# Supplementary material for: Bortezomib Enhances CD70 CAR-T Cell Therapy in Sunitinib Resistant Renal Cell Carcinoma by Inducing Mitochondrial DNA Mediated cGAS-STING Activation
Source: Research Square preprint supplement (doi:10.21203/rs.3.rs-8078134/v1), 2025-11-25
Supplement: Supplementary file 1 [file 47cfc37da746da5cbe36b4c0.xlsx]

## Sheet: Sheet1
FDA-Approved Compounds for Synergistic Cytotoxicity with CAR-T Therapy.
Compound	Kill Efficiency 1	Kill Efficiency 2	Kill Efficiency 3	RelativeCytotoxicity
Compound 38 (S1013)	11.96	8.09	9.69	9.91
Compound 36 (S2853)	7.61	8.83	6.26	7.57
Compound 3 (S8048)	8.37	7.15	5.3	6.94
Compound 28 (S7025)	6.54	8.22	5.22	6.66
Compound 23 (S1648)	5.89	7.51	6.54	6.65
Compound 24 (S3013)	5.03	6.54	8.31	6.63
Compound 11 (S1787)	5.1	8.78	5.98	6.62
Compound 19 (S5971)	7.55	7.4	4.74	6.56
Compound 14 (S1225)	6.3	7.11	6.26	6.55
Compound 2	8.28	5.65	5.65	6.53
Compound 1	6.75	5.79	6.97	6.5
Compound 20	5.54	6.5	7.46	6.5
Compound 22	4.21	7.22	8.03	6.49
Compound 40	4.25	7.71	7.13	6.36
Compound 26	7.23	6.13	5.55	6.3
Compound 33	6.44	6.39	6.01	6.28
Compound 31	6.15	7.45	4.95	6.18
Compound 30	6.49	5.21	6.77	6.16
Compound 39	5.71	6.45	5.95	6.04
Compound 16	4.92	5.31	7.59	5.94
Compound 4	6.81	5.3	5.3	5.81
Compound 29	4.79	5.25	7.37	5.8
Compound 18	5.42	4.98	6.92	5.77
Compound 10	6.56	5.1	5.56	5.74
Compound 7	4.64	3.88	8.2	5.57
Compound 17	6.52	3.36	6.49	5.45
Compound 25	5.95	8.35	2.07	5.45
Compound 6	5.16	4.48	6.47	5.37
Compound 35	5.49	4.8	5.76	5.35
Compound 12	4.41	7.23	4.17	5.27
Compound 8	5.66	6.1	3.86	5.21
Compound 9	5.18	6.17	4.27	5.21
Compound 37	6.39	5.89	3.12	5.13
Compound 21	5.28	5.72	4.34	5.11
Compound 15	5.83	5.55	3.78	5.05
Compound 34	5.65	3.88	5.37	4.96
Compound 27	6.14	3.02	5.67	4.94
Compound 32	5.51	5.41	3.8	4.91
Compound 13	6.31	3.06	4.01	4.46
Compound 5	6.36	3.13	3.41	4.3
Compound 769	4.39	5.73	2.73	4.28
Compound 499	3.85	4.41	4.47	4.24
Compound 1679	2.86	4.87	4.62	4.12
Compound 70	2.62	2.62	6.62	3.95
Compound 389	3.23	4.93	3.66	3.94
Compound 550	3.18	3.42	5.11	3.91
Compound 125	3.74	3.15	4.58	3.83
Compound 587	3.93	3.58	3.97	3.83
Compound 160	2.37	5.69	3.34	3.8
Compound 1619	3.42	4.81	3.04	3.76
Compound 1179	4.52	3.91	2.81	3.75
Compound 342	4.57	4.07	2.52	3.72
Compound 1573	4.87	3.42	2.87	3.72
Compound 1133	2.61	3.79	4.73	3.71
Compound 679	3.27	5.31	2.47	3.68
Compound 764	3.71	4.09	3.17	3.66
Compound 1239	3.22	1.81	5.89	3.64
Compound 1072	3.83	2.88	4.14	3.62
Compound 1624	1.37	5.69	3.63	3.57
Compound 60	3.74	1.68	5.26	3.56
Compound 1488	4.22	3.01	3.4	3.54
Compound 1666	1.94	2.85	5.74	3.51
Compound 208	2.57	4.26	3.61	3.48
Compound 1328	3.97	5.78	0.65	3.47
Compound 202	3.63	2.5	4.25	3.46
Compound 1107	3.35	4.78	2.24	3.46
Compound 1508	3.29	2.6	4.49	3.46
Compound 255	5.07	1.88	3.38	3.45
Compound 141	4.47	4.11	1.7	3.43
Compound 966	6.71	-0.5	4.07	3.43
Compound 841	2.21	5.58	2.44	3.41
Compound 901	2.46	3.31	4.41	3.4
Compound 911	3.48	4.02	2.68	3.39
Compound 1552	2.75	2.84	4.59	3.39
Compound 412	5.1	1.04	3.97	3.37
Compound 977	3.89	3.18	3.04	3.37
Compound 485	2.29	5.12	2.68	3.36
Compound 638	4.68	2.77	2.6	3.35
Compound 836	1.01	5.54	3.49	3.35
Compound 374	3.26	3.33	3.42	3.34
Compound 444	2.72	3.84	3.46	3.34
Compound 1717	2.9	2.39	4.73	3.34
Compound 539	1.78	5.83	2.36	3.32
Compound 972	2.91	2.82	4.22	3.32
Compound 676	2.22	4.16	3.49	3.29
Compound 824	1.75	3.29	4.84	3.29
Compound 946	1.64	4.28	3.95	3.29
Compound 1618	5.06	2.64	2.18	3.29
Compound 294	3.43	5.03	1.36	3.27
Compound 934	2.36	2.22	5.23	3.27
Compound 1448	2.23	4.34	3.23	3.27
Compound 1026	4.18	2.93	2.66	3.26
Compound 56	2.5	2.99	4.28	3.25
Compound 939	4.2	2.98	2.58	3.25
Compound 1350	5.38	1.87	2.47	3.24
Compound 195	2.76	4.72	2.22	3.23
Compound 792	2.6	3.34	3.74	3.23
Compound 843	2.5	2.73	4.47	3.23
Compound 1311	2.81	3.83	3.07	3.23
Compound 410	1.82	3.16	4.65	3.21
Compound 860	3.2	2.34	4.11	3.21
Compound 290	2.4	2.79	4.41	3.2
Compound 992	4.38	3.09	2.13	3.2
Compound 142	3.17	2.77	3.64	3.19
Compound 859	5.14	0.67	3.76	3.19
Compound 909	4.36	2	3.21	3.19
Compound 105	2.99	2.98	3.57	3.18
Compound 347	2.27	3.26	4.02	3.18
Compound 828	4.06	4.39	1.08	3.18
Compound 874	3.75	2.85	2.95	3.18
Compound 879	4.04	3.29	2.23	3.18
Compound 227	3.12	3.53	2.87	3.17
Compound 424	3.48	3.31	2.73	3.17
Compound 1116	3.95	1.66	3.91	3.17
Compound 1144	3.32	2.56	3.62	3.17
Compound 334	2.69	3.68	3.11	3.16
Compound 362	4.49	2.46	2.52	3.16
Compound 463	3.56	3.87	2.04	3.16
Compound 1491	2.39	3.54	3.55	3.16
Compound 431	2.47	4.99	1.99	3.15
Compound 1353	3.75	2.54	3.15	3.15
Compound 426	2.17	4.78	2.47	3.14
Compound 899	2.4	3.72	3.3	3.14
Compound 480	3.93	2.59	2.88	3.13
Compound 500	3.45	3.23	2.71	3.13
Compound 1696	4.79	1.98	2.61	3.13
Compound 997	0.64	4.89	3.82	3.12
Compound 1290	3.98	2.17	3.2	3.12
Compound 438	2.98	3.67	2.67	3.11
Compound 298	2.61	3.28	3.4	3.1
Compound 802	1.67	4.01	3.61	3.1
Compound 1307	3.14	1.93	4.23	3.1
Compound 252	3.26	0.86	5.16	3.09
Compound 1485	3.38	2.36	3.52	3.09
Compound 68	2.67	3.3	3.26	3.08
Compound 533	2.74	4.47	2.02	3.08
Compound 1145	2.63	1.88	4.73	3.08
Compound 1166	4.32	2.98	1.94	3.08
Compound 1657	1.65	3.74	3.83	3.07
Compound 71	2.69	3.36	3.14	3.06
Compound 219	5.09	2.07	2.02	3.06
Compound 1103	2.64	2.43	4.11	3.06
Compound 1181	2.4	3.74	3.06	3.06
Compound 1381	2.74	3.97	2.46	3.06
Compound 188	4.49	3.05	1.61	3.05
Compound 509	1.55	3.31	4.26	3.04
Compound 1231	2.64	3.01	3.46	3.04
Compound 386	3.21	1.17	4.7	3.03
Compound 132	4.2	3.42	1.44	3.02
Compound 373	4.88	1.93	2.24	3.02
Compound 710	3.34	2.86	2.86	3.02
Compound 850	1.32	3.23	4.51	3.02
Compound 1413	3.72	1.58	3.74	3.02
Compound 1641	4	2.37	2.7	3.02
Compound 297	2.71	3.33	2.98	3.01
Compound 1678	3.51	2.88	2.65	3.01
Compound 276	3.74	3.9	1.37	3
Compound 378	2.51	3.94	2.54	3
Compound 559	3.94	1.61	3.46	3
Compound 1467	3.3	3.13	2.58	3
Compound 95	3.9	0.51	4.56	2.99
Compound 1630	3.93	2.27	2.76	2.99
Compound 468	2.64	3.42	2.86	2.98
Compound 472	4.6	1.23	3.11	2.98
Compound 986	4.1	3.12	1.72	2.98
Compound 1128	3.43	2.26	3.23	2.97
Compound 1154	0.59	4.03	4.28	2.97
Compound 1253	2.12	4.45	2.33	2.97
Compound 315	2.78	1.88	4.22	2.96
Compound 1194	0.72	4.55	3.6	2.96
Compound 1427	1.92	2.44	4.51	2.96
Compound 1542	2.93	2.43	3.51	2.96
Compound 1087	3.42	3.72	1.71	2.95
Compound 164	3.06	1.99	3.78	2.94
Compound 461	2.81	1.41	4.59	2.94
Compound 471	3.59	2.67	2.55	2.94
Compound 554	3.37	3.58	1.86	2.94
Compound 766	2.63	2.5	3.68	2.94
Compound 947	4.66	1.81	2.35	2.94
Compound 1075	3.64	2.83	2.34	2.94
Compound 1378	2	3.28	3.53	2.94
Compound 1671	3.92	2.88	2.01	2.94
Compound 217	1.72	2.84	4.22	2.93
Compound 662	3.03	3.14	2.62	2.93
Compound 902	3.23	2.3	3.25	2.93
Compound 691	3.16	3.48	2.11	2.92
Compound 736	2.57	3.78	2.43	2.92
Compound 1234	1.73	3.28	3.74	2.92
Compound 1430	2.22	3.81	2.73	2.92
Compound 1638	3.59	2.99	2.19	2.92
Compound 542	1.2	4.25	3.3	2.91
Compound 904	3.88	1.02	3.84	2.91
Compound 1640	1.55	3.62	3.55	2.91
Compound 1651	2.29	3.5	2.95	2.91
Compound 130	4.25	3.14	1.31	2.9
Compound 262	2.73	2.67	3.3	2.9
Compound 367	3.1	2.42	3.2	2.9
Compound 460	3.25	1.27	4.19	2.9
Compound 605	3.93	3.08	1.68	2.9
Compound 665	3.43	2.85	2.42	2.9
Compound 1114	4.16	2.85	1.71	2.9
Compound 1224	2.41	3.24	3.05	2.9
Compound 1229	2.72	0.98	4.98	2.9
Compound 568	2.59	2.76	3.33	2.89
Compound 690	1.84	3.71	3.11	2.89
Compound 1560	3.33	3.03	2.3	2.89
Compound 586	3.65	1.84	3.14	2.88
Compound 1190	3.29	2.27	3.08	2.88
Compound 1645	3.84	3.35	1.45	2.88
Compound 118	3.77	3.03	1.81	2.87
Compound 321	2.77	3.59	2.24	2.87
Compound 498	5.07	1.32	2.22	2.87
Compound 1070	3	3.08	2.54	2.87
Compound 400	2.66	2.27	3.64	2.86
Compound 1326	2.23	2.61	3.74	2.86
Compound 1704	2.1	1.42	5.05	2.86
Compound 474	2.61	2.65	3.29	2.85
Compound 775	2.55	4.01	1.99	2.85
Compound 943	3.5	1.93	3.14	2.85
Compound 1064	4.2	1.51	2.85	2.85
Compound 204	3.8	2.79	1.93	2.84
Compound 283	2.35	4.95	1.23	2.84
Compound 560	3.83	3.2	1.48	2.84
Compound 734	2.59	4.17	1.77	2.84
Compound 1393	1.99	2.37	4.18	2.84
Compound 296	4.22	2.7	1.57	2.83
Compound 304	4.6	1.63	2.26	2.83
Compound 645	1.44	1.87	5.17	2.83
Compound 1085	2.77	3.27	2.44	2.83
Compound 1143	2.3	3.66	2.53	2.83
Compound 1363	3.03	2.1	3.37	2.83
Compound 110	2.95	2.75	2.75	2.82
Compound 322	2.85	1.89	3.73	2.82
Compound 507	0.77	4.22	3.47	2.82
Compound 653	-0.56	5.77	3.27	2.82
Compound 1171	3.46	0.95	4.05	2.82
Compound 1649	4.1	3.25	1.11	2.82
Compound 1662	1.82	2.68	3.96	2.82
Compound 191	2.02	4.01	2.39	2.81
Compound 481	2.8	3.41	2.22	2.81
Compound 484	2.03	2.37	4.04	2.81
Compound 506	1.85	3.82	2.76	2.81
Compound 1240	4.77	1.78	1.87	2.81
Compound 1408	3.01	1.99	3.41	2.81
Compound 1529	1.77	3.43	3.23	2.81
Compound 1534	3.57	1.74	3.12	2.81
Compound 390	2.68	2.71	3.02	2.8
Compound 1023	4.11	2.02	2.27	2.8
Compound 1035	3.98	3.28	1.12	2.8
Compound 1299	1.53	3.2	3.67	2.8
Compound 1396	2.43	4.82	1.14	2.8
Compound 1443	1.29	3.08	4.04	2.8
Compound 159	3.97	1.7	2.69	2.79
Compound 285	1.24	3.43	3.7	2.79
Compound 577	2.44	4.21	1.73	2.79
Compound 664	2.52	2.96	2.91	2.79
Compound 779	3.07	2.69	2.6	2.79
Compound 121	2.62	3.84	1.87	2.78
Compound 145	1.68	2.86	3.8	2.78
Compound 274	3.28	1.38	3.69	2.78
Compound 826	2.87	1.72	3.74	2.78
Compound 1040	1.09	3.26	3.99	2.78
Compound 1127	2.61	1.13	4.6	2.78
Compound 336	2.47	3.07	2.76	2.77
Compound 360	1.49	3.8	3.02	2.77
Compound 718	3.99	2.03	2.28	2.77
Compound 917	2.46	1.75	4.11	2.77
Compound 1068	2.51	2.27	3.53	2.77
Compound 1318	1	4.62	2.68	2.77
Compound 1371	3.38	1.07	3.87	2.77
Compound 1406	2.67	4.23	1.42	2.77
Compound 1464	2.7	2.62	2.98	2.77
Compound 257	1.25	4.17	2.85	2.76
Compound 379	1.71	3.16	3.43	2.76
Compound 517	2.92	3.47	1.88	2.76
Compound 611	2.85	2.28	3.14	2.76
Compound 633	1.69	3.92	2.67	2.76
Compound 875	2.1	3.69	2.49	2.76
Compound 1197	3.49	1.52	3.28	2.76
Compound 1492	2.65	3.01	2.62	2.76
Compound 108	2.71	1.02	4.51	2.75
Compound 299	3.66	2.78	1.8	2.75
Compound 310	2.45	3.88	1.92	2.75
Compound 333	4.16	2.77	1.31	2.75
Compound 834	2.41	2.68	3.16	2.75
Compound 1316	3.1	2.65	2.51	2.75
Compound 1690	3.93	1.98	2.35	2.75
Compound 473	2.07	2.32	3.83	2.74
Compound 727	4.43	2.01	1.77	2.74
Compound 1535	3.96	3.57	0.69	2.74
Compound 1569	2.69	1.85	3.69	2.74
Compound 288	0.18	3.86	4.16	2.73
Compound 337	3.26	1.36	3.58	2.73
Compound 487	3.55	2.81	1.83	2.73
Compound 465	4.42	2.16	1.56	2.71
Compound 548	3.69	1.9	2.54	2.71
Compound 625	1.63	2.94	3.57	2.71
Compound 740	1.92	4.52	1.7	2.71
Compound 1646	2.65	2	3.48	2.71
Compound 1701	3.23	2.6	2.3	2.71
Compound 1722	2.02	2.95	3.17	2.71
Compound 100	2.37	2.98	2.76	2.7
Compound 185	3.4	2.31	2.41	2.7
Compound 279	1.96	2.28	3.86	2.7
Compound 503	2.84	3.15	2.11	2.7
Compound 979	3.05	3.77	1.28	2.7
Compound 305	2.3	3.89	1.89	2.69
Compound 619	3.2	1.2	3.67	2.69
Compound 655	2.63	2.77	2.67	2.69
Compound 914	3.02	2.5	2.56	2.69
Compound 994	2.24	2.32	3.53	2.69
Compound 1089	2.8	4.33	0.95	2.69
Compound 1499	3.03	4.01	1.03	2.69
Compound 1582	2.5	3.93	1.66	2.69
Compound 1588	2.8	2.81	2.46	2.69
Compound 246	2.57	2.31	3.18	2.68
Compound 266	3.26	1.95	2.82	2.68
Compound 353	1.97	3.41	2.65	2.68
Compound 413	4.01	1.34	2.68	2.68
Compound 419	3.47	0.55	4.01	2.68
Compound 722	3.37	3.9	0.78	2.68
Compound 771	1.62	4.15	2.28	2.68
Compound 862	3.47	3.32	1.25	2.68
Compound 1615	2.82	1.83	3.4	2.68
Compound 489	1.3	2.71	4	2.67
Compound 583	3.17	2.6	2.23	2.67
Compound 693	2.74	3.44	1.83	2.67
Compound 1071	3.42	0.59	4	2.67
Compound 1297	2.17	3.02	2.83	2.67
Compound 1514	2.92	0.75	4.33	2.67
Compound 1711	2.52	3.01	2.47	2.67
Compound 1082	3.27	1.79	2.93	2.66
Compound 85	4.55	3.24	0.18	2.65
Compound 448	2	2.52	3.43	2.65
Compound 699	3.25	1.91	2.8	2.65
Compound 1232	3.27	3.05	1.62	2.65
Compound 1361	2.76	1.16	4.01	2.65
Compound 1503	2.83	2.32	2.79	2.65
Compound 1511	2.2	3.13	2.6	2.65
Compound 1574	2.13	3.21	2.62	2.65
Compound 205	2.34	0.65	4.93	2.64
Compound 580	0.72	3.14	4.05	2.64
Compound 781	2.84	2.51	2.59	2.64
Compound 819	2.82	3.78	1.3	2.64
Compound 846	1.65	3.17	3.1	2.64
Compound 1456	4.52	1.37	2.04	2.64
Compound 1706	2.62	4.01	1.29	2.64
Compound 1720	5.5	1.78	0.64	2.64
Compound 338	2.24	4.49	1.17	2.63
Compound 702	3.35	0.57	3.97	2.63
Compound 772	2.6	2.8	2.51	2.63
Compound 1109	3.32	2.57	2	2.63
Compound 1125	3.74	4.17	-0.02	2.63
Compound 1517	2.49	1.72	3.67	2.63
Compound 1566	1.76	2.61	3.53	2.63
Compound 1590	1.7	3.24	2.96	2.63
Compound 495	4.07	1.52	2.27	2.62
Compound 913	1.6	2.41	3.86	2.62
Compound 1460	4.45	2.35	1.07	2.62
Compound 302	3.53	2.23	2.06	2.61
Compound 437	3.3	2.57	1.97	2.61
Compound 657	1.77	3.36	2.71	2.61
Compound 720	1.62	3.54	2.67	2.61
Compound 814	0.07	4.1	3.66	2.61
Compound 884	3.08	0.91	3.82	2.61
Compound 1300	2.85	2.52	2.46	2.61
Compound 1715	3.24	1.51	3.09	2.61
Compound 275	4.76	1.56	1.47	2.6
Compound 365	2.87	2.06	2.88	2.6
Compound 428	1.82	2.85	3.15	2.6
Compound 618	4.13	0.57	3.1	2.6
Compound 647	3.3	2.12	2.37	2.6
Compound 965	2.92	2.26	2.61	2.6
Compound 1033	3.25	2.7	1.84	2.6
Compound 1417	2.59	1.93	3.29	2.6
Compound 639	3.29	2.11	2.41	2.6
Compound 320	2.55	2.68	2.54	2.59
Compound 621	1.84	2.97	2.95	2.59
Compound 849	4.91	2.52	0.35	2.59
Compound 907	1.29	2.15	4.34	2.59
Compound 1264	3.56	2.7	1.51	2.59
Compound 1375	3.15	2.25	2.37	2.59
Compound 1421	3.2	1.66	2.91	2.59
Compound 671	3.04	1.91	2.81	2.59
Compound 1277	3.42	2.58	1.76	2.58
Compound 1368	1.07	3.62	3.06	2.58
Compound 1658	2.78	2.86	2.1	2.58
Compound 445	1.74	3.79	2.18	2.57
Compound 635	3.41	2.44	1.87	2.57
Compound 1198	2.72	4.76	0.22	2.57
Compound 847	2.3	2.11	2.29	2.23
Compound 1235	2.33	2.07	2.27	2.22
Compound 1395	2.25	1.86	2.54	2.22
Compound 1721	2.33	2.58	1.76	2.22
Compound 915	2.29	2.66	1.69	2.21
Compound 1132	1.91	4.37	0.34	2.2
Compound 1201	1.01	1.14	4.46	2.2
Compound 1303	3.59	0.31	2.7	2.2
Compound 1453	2.27	1.61	2.71	2.2
Compound 1484	3.8	1.41	1.4	2.2
Compound 1669	2.88	0.47	3.26	2.2
Compound 1675	1.78	0.08	4.73	2.2
Compound 54	2.79	0.83	2.94	2.19
Compound 394	0.68	2.22	3.67	2.19
Compound 534	1.13	1.78	3.65	2.19
Compound 553	2.2	3.58	0.79	2.19
Compound 582	3.39	0.89	2.29	2.19
Compound 963	1.37	3.67	1.54	2.19
Compound 1165	2.6	1.36	2.61	2.19
Compound 1276	3.41	0.59	2.59	2.19
Compound 1283	3.31	1.44	1.82	2.19
Compound 1520	2.43	1.35	2.79	2.19
Compound 1527	1.32	3	2.25	2.19
Compound 46	3.86	1.06	1.61	2.18
Compound 491	3.44	1.27	1.84	2.18
Compound 654	2.27	1.93	2.34	2.18
Compound 682	2.18	1.01	3.35	2.18
Compound 922	1.24	2.3	2.98	2.18
Compound 998	2.72	2.09	1.75	2.18
Compound 1039	2.47	2.3	1.77	2.18
Compound 1420	3.71	1.89	0.93	2.18
Compound 1522	2.26	2.95	1.32	2.18
Compound 1579	2.35	3.15	1.05	2.18
Compound 462	1.27	2.89	2.36	2.17
Compound 520	1.04	3.79	1.67	2.17
Compound 575	2.89	2.74	0.88	2.17
Compound 1074	2.87	0.74	2.91	2.17
Compound 1160	-0.53	3.38	3.66	2.17
Compound 1323	2.37	-0.27	4.42	2.17
Compound 1357	0.57	3.26	2.69	2.17
Compound 1419	2.28	3.24	1	2.17
Compound 1516	2.7	1.88	1.93	2.17
Compound 1526	1.73	0.59	4.18	2.17
Compound 1551	1.7	2.75	2.05	2.17
Compound 1570	1.42	3.15	1.95	2.17
Compound 1577	3.91	2.02	0.57	2.17
Compound 1699	1.86	1.58	3.07	2.17
Compound 94	1.54	2.14	2.79	2.16
Compound 106	2.03	2.82	1.63	2.16
Compound 713	2.12	3.86	0.51	2.16
Compound 1061	3.17	2.63	0.68	2.16
Compound 1554	1.04	3.78	1.66	2.16
Compound 1571	1.27	2.71	2.49	2.16
Compound 1572	2.43	2.1	1.95	2.16
Compound 80	2.22	1.21	3.02	2.15
Compound 747	1.51	2.82	2.13	2.15
Compound 789	1.24	3.84	1.36	2.15
Compound 1046	2.53	3.14	0.77	2.15
Compound 1243	2.6	3.28	0.56	2.15
Compound 1306	1.89	1.9	2.66	2.15
Compound 1541	1.46	4.07	0.94	2.15
Compound 234	1.78	1.37	3.26	2.14
Compound 1088	2.06	0.91	3.41	2.13
Compound 1385	2.1	1.1	3.19	2.13
Compound 87	2.53	2.93	0.89	2.12
Compound 107	2.39	1.84	2.12	2.12
Compound 126	1.08	3.05	2.22	2.12
Compound 260	1.7	1.91	2.74	2.12
Compound 600	1.04	3.29	2.03	2.12
Compound 620	1.7	2.35	2.31	2.12
Compound 839	1.85	2.39	2.1	2.12
Compound 880	3.13	0.76	2.48	2.12
Compound 1254	1.97	2.39	1.99	2.12
Compound 1487	0.14	2.79	3.43	2.12
Compound 1623	2.23	1.96	2.18	2.12
Compound 187	2.47	1.49	2.35	2.11
Compound 224	3.31	3.5	-0.49	2.11
Compound 287	1.34	2.76	2.24	2.11
Compound 351	1.25	2.47	2.59	2.11
Compound 1008	1.44	1.51	3.38	2.11
Compound 1220	-0.5	2.19	4.66	2.11
Compound 1294	1.76	2.36	2.21	2.11
Compound 1424	3.12	1.84	1.37	2.11
Compound 1609	1.92	2.29	2.1	2.11
Compound 1611	3.04	0.58	2.71	2.11
Compound 199	3.25	1.39	1.68	2.1
Compound 254	2.84	1.31	2.15	2.1
Compound 566	4.33	0.8	1.19	2.1
Compound 813	1.84	2.99	1.48	2.1
Compound 937	3.1	1.34	1.86	2.1
Compound 942	0.31	1.94	4.04	2.1
Compound 1017	2.51	3.44	0.35	2.1
Compound 1042	1.57	1.83	2.89	2.1
Compound 1067	1.55	2.52	2.22	2.1
Compound 1222	2.37	3.43	0.49	2.1
Compound 1344	2.96	3.03	0.3	2.1
Compound 181	3	0.64	2.64	2.09
Compound 370	0.74	1.25	4.3	2.09
Compound 572	3.02	1.36	1.89	2.09
Compound 833	1.67	1.66	2.95	2.09
Compound 953	1.14	1.72	3.42	2.09
Compound 1062	1.6	1.06	3.6	2.09
Compound 1255	1.02	2.99	2.27	2.09
Compound 1710	1.98	2.18	2.12	2.09
Compound 528	3.38	0.78	2.07	2.08
Compound 715	2.21	2.29	1.73	2.08
Compound 767	2.78	0.2	3.26	2.08
Compound 382	2.15	1.79	2.02	1.99
Compound 540	1.1	1.49	3.38	1.99
Compound 760	0.62	2.8	2.56	1.99
Compound 870	-0.65	3.08	3.53	1.99
Compound 1010	2.54	1.39	2.04	1.99
Compound 1661	0.56	3.06	2.34	1.99
Compound 1695	2.1	0.72	3.15	1.99
Compound 163	1.22	0.7	4.02	1.98
Compound 317	1.95	2.29	1.71	1.98
Compound 327	0.1	2.91	2.94	1.98
Compound 447	1.53	2.2	2.19	1.98
Compound 823	1.08	2.05	2.82	1.98
Compound 889	2.56	0.36	3.02	1.98
Compound 890	0.52	2.66	2.75	1.98
Compound 967	1.66	2.34	1.95	1.98
Compound 1656	1.72	0.87	3.34	1.98
Compound 51	2.3	2.42	1.18	1.97
Compound 207	2.58	2.27	1.05	1.97
Compound 313	0.77	2.85	2.29	1.97
Compound 341	2.63	1.31	1.97	1.97
Compound 510	3.85	1.41	0.66	1.97
Compound 630	2.51	1.43	1.98	1.97
Compound 751	1.85	3.81	0.26	1.97
Compound 245	2.49	-0.04	3.23	1.89
Compound 396	3.13	0.82	1.73	1.89
Compound 409	1.78	1.84	2.05	1.89
Compound 756	3.43	-0.13	2.38	1.89
Compound 1094	2.66	0.97	2.04	1.89
Compound 1129	3.33	1.32	1.02	1.89
Compound 1204	1.5	2.04	2.13	1.89
Compound 1211	2.72	1.24	1.72	1.89
Compound 1266	1.61	1.8	2.25	1.89
Compound 1372	0.16	3.96	1.55	1.89
Compound 1709	2.83	1.18	1.67	1.89
Compound 1728	1.46	1.76	2.44	1.89
Compound 293	1.38	2.27	1.98	1.88
Compound 364	1.76	1.91	1.96	1.88
Compound 552	1.58	2.41	1.65	1.88
Compound 615	1.34	2.11	2.19	1.88
Compound 672	0.87	3	1.77	1.88
Compound 1142	2.5	-0.13	3.28	1.88
Compound 1483	0.95	2.12	2.58	1.88
Compound 1513	2.26	1.64	1.74	1.88
Compound 1543	1.2	1.12	3.32	1.88
Compound 93	2.24	1.28	2.08	1.87
Compound 211	-0.03	3.84	1.81	1.87
Compound 385	1.23	0.41	3.97	1.87
Compound 397	2.66	0.84	2.13	1.87
Compound 683	2	1.99	1.61	1.87
Compound 712	2.71	1.58	1.31	1.87
Compound 773	3.01	1.26	1.33	1.87
Compound 812	1.79	2.27	1.56	1.87
Compound 919	1.91	1.46	2.23	1.87
Compound 970	0.64	1.46	3.51	1.87
Compound 1461	2.19	2.21	1.2	1.87
Compound 1495	0.99	2.66	1.96	1.87
Compound 1555	1.32	1.43	2.86	1.87
Compound 1564	1.42	1.9	2.29	1.87
Compound 1591	2.02	0.83	2.77	1.87
Compound 66	2.46	0.94	2.18	1.86
Compound 420	2.5	1.15	1.93	1.86
Compound 490	2.47	0.56	2.53	1.86
Compound 565	3.05	0.38	2.15	1.86
Compound 707	-1.07	1.77	4.9	1.86
Compound 1036	2.43	0.45	2.69	1.86
Compound 1269	0.93	2.62	2.04	1.86
Compound 1281	1.26	1.15	3.17	1.86
Compound 1293	3.14	2.29	0.16	1.86
Compound 1575	2.03	1.64	1.9	1.86
Compound 173	2.6	0.83	2.12	1.85
Compound 174	2.9	0	2.65	1.85
Compound 340	1.42	1.62	2.51	1.85
Compound 721	0.67	2.3	2.6	1.85
Compound 931	2.71	1.33	1.5	1.85
Compound 1101	2.41	0.87	2.26	1.85
Compound 78	2.26	2.05	1.22	1.84
Compound 81	1.05	1.86	2.61	1.84
Compound 135	2.01	2.06	1.46	1.84
Compound 213	2.99	2.09	0.45	1.84
Compound 435	1.79	1.09	2.64	1.84
Compound 541	2.14	0.27	3.1	1.84
Compound 978	1.45	0.93	3.15	1.84
Compound 1225	0.63	2.98	1.92	1.84
Compound 1263	2.38	0.94	2.22	1.84
Compound 1670	2.59	1.12	1.83	1.84
Compound 1674	2.48	1.93	1.12	1.84
Compound 1686	0.65	2.85	2.02	1.84
Compound 1698	1.15	0.33	4.04	1.84
Compound 686	1.02	1.43	3.05	1.83
Compound 898	1.71	1.95	1.84	1.83
Compound 1313	3.5	0.4	1.58	1.83
Compound 63	2.57	1.91	0.98	1.82
Compound 809	0.16	2.62	2.69	1.82
Compound 887	2.21	2.66	0.59	1.82
Compound 133	-0.06	3.62	1.86	1.81
Compound 193	2.28	2.93	0.23	1.81
Compound 526	1.96	0.06	3.4	1.81
Compound 609	2.2	2.53	0.69	1.81
Compound 648	1.53	2.32	1.59	1.81
Compound 811	2.68	0.78	1.97	1.81
Compound 1012	0.82	2.07	2.54	1.81
Compound 1655	1.85	2.37	1.21	1.81
Compound 1667	2.97	0.98	1.49	1.81
Compound 50	0.42	2.63	2.36	1.8
Compound 92	2.01	0.82	2.55	1.8
Compound 281	1.94	2.81	0.65	1.8
Compound 467	3.44	1.21	0.74	1.8
Compound 1270	-0.36	2.79	2.97	1.8
Compound 1347	1.97	1.17	2.25	1.8
Compound 269	1.48	1.63	2.27	1.79
Compound 561	2.48	1.97	0.92	1.79
Compound 905	2.6	0.32	2.44	1.79
Compound 1043	-0.29	3.58	2.09	1.79
Compound 1168	1.25	2.05	2.06	1.79
Compound 1206	2.88	0.82	1.66	1.79
Compound 1275	1.95	2.22	1.2	1.79
Compound 1334	2.43	0.96	1.96	1.79
Compound 1432	1.75	3.45	0.17	1.79
Compound 1439	1.51	3.21	0.65	1.79
Compound 1525	2.97	1.3	1.1	1.79
Compound 58	1.02	1.91	2.41	1.78
Compound 97	2.34	1.25	1.75	1.78
Compound 629	1.97	2.34	1.03	1.78
Compound 791	1.81	1.34	2.19	1.78
Compound 1044	1.51	1.89	1.95	1.78
Compound 1149	2.83	0.63	1.87	1.78
Compound 1310	2.55	0.58	2.21	1.78
Compound 1348	2.92	0.06	2.36	1.78
Compound 1379	1.87	1.53	1.93	1.78
Compound 1387	1.22	2.1	2.02	1.78
Compound 1452	-0.01	2.49	2.86	1.78
Compound 136	2.75	0.72	1.83	1.77
Compound 632	1.87	1.89	1.56	1.77
Compound 960	1.2	2.35	1.78	1.77
Compound 1076	0.81	0.98	3.5	1.77
Compound 1394	1.59	2.33	1.39	1.77
Compound 1481	0.37	2.27	2.66	1.77
Compound 155	1.16	2.26	1.87	1.76
Compound 328	2.51	0.84	1.94	1.76
Compound 493	1.85	2.5	0.94	1.76
Compound 501	2.93	1.34	1.02	1.76
Compound 508	2.7	1.73	0.85	1.76
Compound 525	2.35	0.37	2.56	1.76
Compound 703	0.92	2.77	1.61	1.76
Compound 709	2.03	2.66	0.58	1.76
Compound 750	0.4	1.77	3.11	1.76
Compound 780	2.06	2.01	1.21	1.76
Compound 906	-0.52	2.75	3.06	1.76
Compound 1030	3.46	-0.34	2.17	1.76
Compound 1041	1.42	1.27	2.59	1.76
Compound 1099	0.55	0.71	4.01	1.76
Compound 117	1.14	1.74	2.37	1.75
Compound 486	-0.11	2.9	2.46	1.75
Compound 502	2	1.8	1.46	1.75
Compound 616	0.77	3.52	0.96	1.75
Compound 877	1.47	1.42	2.36	1.75
Compound 995	2.88	2.35	0.01	1.75
Compound 999	0.86	2.09	2.31	1.75
Compound 1106	2.5	1.94	0.82	1.75
Compound 1352	2.23	0.78	2.25	1.75
Compound 1437	1.76	1.44	2.05	1.75
Compound 1530	3.1	1.45	0.7	1.75
Compound 1578	1.94	0.74	2.57	1.75
Compound 1580	2.04	0.36	2.84	1.75
Compound 1629	2.76	1.43	1.07	1.75
Compound 1688	3.26	1.6	0.39	1.75
Compound 101	1.01	1.33	2.9	1.74
Compound 450	3.12	0.36	1.73	1.74
Compound 595	0.19	2.91	2.1	1.74
Compound 739	1.44	2.32	1.48	1.74
Compound 783	1.43	0.96	2.83	1.74
Compound 1216	0.66	2.31	2.26	1.74
Compound 1392	0.84	1.79	2.59	1.74
Compound 82	3.04	0.56	1.6	1.73
Compound 184	1.28	2.1	1.81	1.73
Compound 578	1.58	1.98	1.64	1.73
Compound 968	1.49	1.32	2.4	1.73
Compound 1119	1.29	1.8	2.09	1.73
Compound 1418	2.25	2.25	0.69	1.73
Compound 1449	1.22	2.03	1.94	1.73
Compound 1672	1.71	2.09	1.39	1.73
Compound 166	2.65	0.76	1.77	1.72
Compound 871	2.78	0.63	1.76	1.72
Compound 1359	1.46	2.14	1.56	1.72
Compound 1714	1.21	1.31	2.64	1.72
Compound 67	2.07	0.63	2.43	1.71
Compound 113	1.01	1.61	2.5	1.71
Compound 115	2.29	1.39	1.43	1.71
Compound 172	0.91	1.31	2.91	1.71
Compound 289	1.26	1.53	2.34	1.71
Compound 358	2.57	2.09	0.46	1.71
Compound 692	2.24	1.26	1.62	1.71
Compound 800	0.8	2.25	2.08	1.71
Compound 1104	2	0.58	2.54	1.71
Compound 1221	1.57	1.13	2.45	1.71
Compound 1459	3.19	2.78	-0.85	1.71
Compound 1636	3.11	1.4	0.62	1.71
Compound 229	0.53	2.86	1.71	1.7
Compound 388	4.75	0.33	0.03	1.7
Compound 538	0.12	3.06	1.91	1.7
Compound 856	1.51	0.81	2.78	1.7
Compound 896	2.38	2.56	0.16	1.7
Compound 935	2.42	0.8	1.89	1.7
Compound 1115	0.77	3.48	0.84	1.7
Compound 1246	1.85	1.45	1.81	1.7
Compound 1333	-0.49	1.62	3.97	1.7
Compound 1635	0.77	1.55	2.77	1.7
Compound 1719	0.96	1.99	2.16	1.7
Compound 77	1.14	2.82	1.12	1.69
Compound 261	2.21	0.4	2.46	1.69
Compound 418	3	-0.39	2.45	1.69
Compound 588	2.89	2.09	0.08	1.69
Compound 646	0.2	2.3	2.56	1.69
Compound 845	2.67	0.9	1.5	1.69
Compound 926	1.66	1.69	1.71	1.69
Compound 1157	1.45	1.74	1.89	1.69
Compound 1289	1.55	1.13	2.38	1.69
Compound 1512	0.95	2.89	1.23	1.69
Compound 1708	1.48	1.69	1.92	1.69
Compound 120	1.65	2.39	1.01	1.68
Compound 603	2.32	2.61	0.1	1.68
Compound 608	2.09	1.73	1.22	1.68
Compound 776	2.8	0.69	1.54	1.68
Compound 987	3.36	0.67	1.01	1.68
Compound 1192	2.23	0.48	2.34	1.68
Compound 1442	0.71	1.08	3.24	1.68
Compound 1634	2.72	1.53	0.78	1.68
Compound 1691	0.59	1.74	2.73	1.68
Compound 111	1.99	0.92	2.09	1.67
Compound 152	2.6	1.36	1.05	1.67
Compound 497	0.17	3.52	1.34	1.67
Compound 549	0.73	2.51	1.78	1.67
Compound 951	1.34	3	0.67	1.67
Compound 1172	-0.1	2.52	2.57	1.67
Compound 1362	-0.29	3.57	1.73	1.67
Compound 1411	0.11	3.63	1.27	1.67
Compound 1462	2.24	1.27	1.51	1.67
Compound 65	2.26	0.51	2.21	1.66
Compound 175	1.2	2.68	1.08	1.66
Compound 599	2.26	1.1	1.62	1.66
Compound 1110	1.29	0.69	3	1.66
Compound 1147	0.45	2.35	2.17	1.66
Compound 1648	1.75	2.1	1.13	1.66
Compound 1654	2.6	1.62	0.76	1.66
Compound 1725	1.5	0.81	2.66	1.66
Compound 268	1.38	2.12	1.45	1.65
Compound 309	3.43	0.17	1.33	1.65
Compound 436	0.92	2.03	1.99	1.65
Compound 1098	-0.99	3.53	2.41	1.65
Compound 1335	2.02	2.57	0.36	1.65
Compound 1398	2.32	3.54	-0.91	1.65
Compound 1438	-0.09	2.59	2.46	1.65
Compound 1444	1.52	2.82	0.62	1.65
Compound 1489	1.3	0.61	3.02	1.65
Compound 1524	2.02	1.28	1.64	1.65
Compound 1687	1.83	1.49	1.63	1.65
Compound 1718	0.98	2.62	1.36	1.65
Compound 674	0.51	2.07	2.33	1.64
Compound 752	1.99	0.5	2.44	1.64
Compound 971	1.36	2.43	1.12	1.64
Compound 1273	1.54	1.85	1.52	1.64
Compound 1280	2.46	0.84	1.63	1.64
Compound 286	1.32	1	2.57	1.63
Compound 546	1.52	0.85	2.51	1.63
Compound 1278	1.37	3.24	0.29	1.63
Compound 1599	1.82	0.48	2.58	1.63
Compound 134	3.49	0.09	1.28	1.62
Compound 352	2.31	1.34	1.19	1.62
Compound 355	3.38	-0.09	1.57	1.62
Compound 368	-1.48	4.51	1.83	1.62
Compound 383	0.68	0.27	3.91	1.62
Compound 716	3.79	0.08	1.01	1.62
Compound 1084	-0.23	2.72	2.36	1.62
Compound 1100	0.87	0.62	3.36	1.62
Compound 1286	1.82	0.33	2.71	1.62
Compound 1601	2.61	1.93	0.33	1.62
Compound 314	1.32	0.46	3.05	1.61
Compound 464	1.1	2.55	1.19	1.61
Compound 523	2.08	2.62	0.12	1.61
Compound 762	0.82	1.44	2.55	1.61
Compound 1237	2.51	2.05	0.28	1.61
Compound 1506	0.9	1.5	2.41	1.61
Compound 1683	-0.49	1.97	3.35	1.61
Compound 417	2.28	0.13	2.4	1.6
Compound 524	1.37	2.95	0.49	1.6
Compound 725	1.62	2.18	1	1.6
Compound 996	0.85	1.85	2.11	1.6
Compound 1113	0.36	1.82	2.6	1.6
Compound 1288	1.05	1.99	1.74	1.6
Compound 1553	1.62	0.87	2.3	1.6
Compound 264	0.01	2.52	2.25	1.59
Compound 361	1.58	1.58	1.61	1.59
Compound 476	-0.36	4.47	0.68	1.59
Compound 584	3.2	-1.24	2.81	1.59
Compound 805	0.65	0.9	3.22	1.59
Compound 982	1.77	2.39	0.62	1.59
Compound 1159	1.14	0.46	3.17	1.59
Compound 1180	1.03	1.94	1.81	1.59
Compound 1292	0.23	1.11	3.43	1.59
Compound 1366	0.76	2.71	1.29	1.59
Compound 1405	2.96	-0.23	2.05	1.59
Compound 1414	1.91	-0.21	3.07	1.59
Compound 1429	1.07	2.24	1.45	1.59
Compound 1507	2.42	0.92	1.41	1.59
Compound 109	0.79	0.54	3.39	1.58
Compound 119	1.98	0.8	1.98	1.58
Compound 196	2.3	1.45	0.98	1.58
Compound 200	0.83	1.47	2.45	1.58
Compound 359	3.2	1.41	0.13	1.58
Compound 743	3.7	1.28	-0.24	1.58
Compound 1203	1.06	3.3	0.38	1.58
Compound 1317	1.66	0.47	2.62	1.58
Compound 1608	1.78	0.99	1.98	1.58
Compound 593	1.27	1.96	1.48	1.57
Compound 613	0.63	2.13	1.96	1.57
Compound 1000	0.51	2.4	1.81	1.57
Compound 1245	-0.42	2.17	2.95	1.57
Compound 1562	1.16	0.76	2.8	1.57
Compound 1637	2.32	1.01	1.38	1.57
Compound 1712	2.54	0.1	2.06	1.57
Compound 64	0.18	1.46	3.03	1.56
Compound 392	1.92	1.1	1.66	1.56
Compound 440	1.63	1.27	1.78	1.56
Compound 530	1.56	1.01	2.1	1.56
Compound 801	1.13	2.21	1.34	1.56
Compound 815	0.45	2.83	1.4	1.56
Compound 1158	1.9	2.06	0.73	1.56
Compound 1341	4.6	0.29	-0.22	1.56
Compound 1493	1.45	2.91	0.33	1.56
Compound 1538	-0.42	3.73	1.39	1.56
Compound 346	3.89	0.53	0.24	1.55
Compound 456	1.81	1.97	0.88	1.55
Compound 514	-1.45	1.97	4.13	1.55
Compound 758	1.42	1.19	2.04	1.55
Compound 768	0.8	1.54	2.3	1.55
Compound 893	2.42	0.12	2.11	1.55
Compound 1013	1.59	2.2	0.84	1.55
Compound 114	1.32	1.01	2.29	1.54
Compound 221	1.31	1.34	1.96	1.54
Compound 222	1.35	1.14	2.13	1.54
Compound 924	1.76	1.75	1.1	1.54
Compound 1031	-0.18	2.91	1.89	1.54
Compound 1124	2.16	1.91	0.57	1.54
Compound 1339	1.91	1.31	1.42	1.54
Compound 1685	2.41	1.67	0.54	1.54
Compound 228	0.65	1.37	2.59	1.53
Compound 399	0.09	2.53	1.98	1.53
Compound 469	3.2	1.09	0.29	1.53
Compound 571	3.33	1.86	-0.61	1.53
Compound 867	3.44	1.41	-0.25	1.53
Compound 940	2.44	2.47	-0.31	1.53
Compound 969	0.18	2.9	1.5	1.53
Compound 1078	-0.43	0.71	4.29	1.53
Compound 1187	1.86	0.44	2.28	1.53
Compound 1585	1.72	1.51	1.36	1.53
Compound 513	2.62	1.36	0.6	1.52
Compound 761	-0.07	1.19	3.43	1.52
Compound 831	1.98	1.17	1.41	1.52
Compound 868	2.74	1.24	0.57	1.52
Compound 916	1.64	2.29	0.62	1.52
Compound 948	0.18	3.77	0.6	1.52
Compound 1612	2.74	-0.29	2.11	1.52
Compound 1632	1.85	0.72	1.99	1.52
Compound 1016	-0.46	3.39	1.6	1.51
Compound 1587	1.2	2.87	0.48	1.51
Compound 189	3.44	1.51	-0.45	1.5
Compound 356	0.66	0.45	3.39	1.5
Compound 446	1.6	1.26	1.64	1.5
Compound 640	1.25	1.8	1.43	1.5
Compound 579	2.96	0.06	0.74	1.25
Compound 592	2.23	1.11	0.42	1.25
Compound 696	0.54	1.39	1.82	1.25
Compound 825	1.06	0.34	2.36	1.25
Compound 959	1.96	0.91	0.88	1.25
Compound 1550	1.96	0.06	1.72	1.25
Compound 57	1.71	1.1	0.93	1.24
Compound 518	1.76	0.95	1.01	1.24
Compound 1626	0.78	0.39	2.52	1.23
Compound 416	0.53	2.04	1.08	1.22
Compound 778	1.91	0.18	1.57	1.22
Compound 830	1.95	2.03	-0.3	1.22
Compound 44	1.4	0.14	2.08	1.21
Compound 162	2.24	1.09	0.29	1.21
Compound 324	0.28	2.15	1.18	1.21
Compound 332	1.18	0.8	1.66	1.21
Compound 585	1.22	-0.2	2.61	1.21
Compound 950	1	1.27	1.35	1.21
Compound 1056	-0.1	1.53	2.19	1.21
Compound 1463	1.18	0.28	2.18	1.21
Compound 215	1.69	0.2	1.71	1.2
Compound 366	1.9	2.09	-0.4	1.2
Compound 1498	0.85	1.29	1.45	1.2
Compound 1621	1.43	1.01	1.18	1.2
Compound 411	1.33	0.36	1.89	1.19
Compound 835	1.6	1.27	0.7	1.19
Compound 956	1.63	0.99	0.94	1.19
Compound 1482	2.82	-0.32	1.09	1.19
Compound 1532	-0.61	1.99	2.19	1.19
Compound 277	1.5	1.66	0.39	1.18
Compound 1258	1.4	1.06	1.09	1.18
Compound 1473	2.31	-0.34	1.58	1.18
Compound 1515	-0.19	1.28	2.44	1.18
Compound 1703	0.76	2.06	0.71	1.18
Compound 265	2.33	0.47	0.7	1.17
Compound 331	2.25	-0.45	1.7	1.17
Compound 1009	-0.24	1.53	2.23	1.17
Compound 622	-0.1	3.57	0.01	1.16
Compound 658	-1.53	2.79	2.23	1.16
Compound 729	-0.65	3.84	0.29	1.16
Compound 793	1.57	0.41	1.5	1.16
Compound 1724	0.65	2.37	0.47	1.16
Compound 225	1.59	1.55	0.31	1.15
Compound 466	2.22	0.38	0.83	1.15
Compound 990	1.32	-0.18	2.32	1.15
Compound 1184	1.96	1.36	0.12	1.15
Compound 1298	2.7	1.04	-0.29	1.15
Compound 753	3.06	1.5	-1.13	1.14
Compound 1164	0.08	1.61	1.74	1.14
Compound 1477	2.12	1.42	-0.14	1.14
Compound 1633	-0.03	0.66	2.81	1.14
Compound 1707	0.1	2.98	0.34	1.14
Compound 422	0.9	2.2	0.3	1.13
Compound 594	1.17	0.31	1.9	1.13
Compound 1616	2.64	-0.61	1.36	1.13
Compound 148	1.96	-0.48	1.89	1.12
Compound 512	1.82	1.44	0.09	1.12
Compound 837	0.38	0.41	2.58	1.12
Compound 988	1.27	1.37	0.73	1.12
Compound 1108	0.92	0.14	2.31	1.12
Compound 1338	0.31	0.82	2.24	1.12
Compound 1391	0.15	1.81	1.42	1.12
Compound 1457	1.19	2.27	-0.09	1.12
Compound 1486	2.35	0.61	0.4	1.12
Compound 1558	0.04	2.58	0.73	1.12
Compound 614	1.75	1.85	-0.26	1.11
Compound 925	1.79	0.14	1.41	1.11
Compound 958	2.55	-0.5	1.3	1.11
Compound 312	-0.64	2.53	1.4	1.1
Compound 415	1.3	0.78	1.22	1.1
Compound 475	1.56	0.99	0.75	1.1
Compound 496	3.12	0.3	-0.11	1.1
Compound 636	2.54	0.11	0.65	1.1
Compound 719	0.49	1.26	1.55	1.1
Compound 980	1.72	0.03	1.53	1.1
Compound 1412	2.61	0.12	0.58	1.1
Compound 1451	-0.44	2.06	1.7	1.1
Compound 488	0.53	1.75	0.98	1.09
Compound 1126	0.77	1.66	0.84	1.09
Compound 1193	1	1.23	1.02	1.09
Compound 1244	-0.78	3.03	1.01	1.09
Compound 1500	3.29	-0.6	0.57	1.09
Compound 443	0.87	1.83	0.55	1.08
Compound 641	-0.38	2.9	0.71	1.08
Compound 680	1.39	1.97	-0.12	1.08
Compound 685	1.21	1.64	0.38	1.08
Compound 723	1.03	0.49	1.72	1.08
Compound 745	-0.36	3.07	0.55	1.08
Compound 853	-1.16	2	2.39	1.08
Compound 1055	1.45	1.17	0.61	1.08
Compound 863	0.42	1.76	1.04	1.07
Compound 1291	0.33	2.19	0.68	1.07
Compound 291	1.79	1.04	0.34	1.06
Compound 439	2.01	0.43	0.72	1.05
Compound 1358	1.15	0.15	1.83	1.05
Compound 452	2.91	1.31	-1.11	1.04
Compound 787	-0.13	2.49	0.76	1.04
Compound 817	1.06	1.17	0.9	1.04
Compound 158	-0.76	0.18	3.64	1.02
Compound 354	1.56	2.93	-1.42	1.02
Compound 799	1.9	0.26	0.89	1.02
Compound 1131	0.11	1.04	1.91	1.02
Compound 1697	2.1	1.14	-0.18	1.02
Compound 532	3.08	-0.84	0.79	1.01
Compound 150	0.87	1.38	0.73	0.99
Compound 596	0.25	1.63	1.1	0.99
Compound 882	1.22	0.69	1.06	0.99
Compound 1597	-0.51	1.8	1.68	0.99
Compound 1037	2.54	-0.24	0.61	0.97
Compound 1434	1.05	1.49	0.36	0.97
Compound 1478	-0.68	2.27	1.33	0.97
Compound 1602	1.15	1.68	0.08	0.97
Compound 1668	1.46	-0.15	1.6	0.97
Compound 1373	1.71	-0.27	1.45	0.96
Compound 1594	-1.81	2.33	2.35	0.96
Compound 1631	1.01	0.54	1.32	0.96
Compound 116	2.28	0.26	0.31	0.95
Compound 866	-0.7	1.27	2.25	0.94
Compound 1120	-0.55	2.55	0.82	0.94
Compound 1268	0.08	0.54	2.19	0.94
Compound 505	1.14	-0.24	1.9	0.93
Compound 161	1.85	0.85	0.07	0.92
Compound 278	0.9	0.8	1.08	0.92
Compound 936	-0.13	1.9	1	0.92
Compound 1011	-0.99	1.21	2.54	0.92
Compound 1360	-0.41	1.53	1.63	0.92
Compound 1617	1.33	2.58	-1.15	0.92
Compound 1676	0.52	0.76	1.47	0.92
Compound 241	2.37	-0.05	0.38	0.9
Compound 430	2.61	0.68	-0.58	0.9
Compound 689	2.32	1.3	-0.93	0.9
Compound 1336	2.71	-1.25	1.24	0.9
Compound 250	1.09	1.27	0.31	0.89
Compound 393	-0.03	1.88	0.81	0.89
Compound 403	1.16	1.2	0.32	0.89
Compound 962	2.55	-1.3	1.4	0.88
Compound 1295	-0.21	0.93	1.92	0.88
Compound 1048	-0.55	1.88	1.28	0.87
Compound 1095	-0.58	3.05	0.13	0.87
Compound 1423	2.35	-0.39	0.65	0.87
Compound 1732	1.29	-0.22	1.49	0.85
Compound 928	1.22	0.56	0.75	0.84
Compound 1196	0.45	1.17	0.9	0.84
Compound 1073	0.01	1.37	1.12	0.83
Compound 178	0.01	1.92	0.55	0.82
Compound 344	0.77	1.69	0	0.82
Compound 1028	2.17	-0.36	0.66	0.82
Compound 1272	2.12	0.48	-0.15	0.82
Compound 1540	-1.41	1.98	1.87	0.82
Compound 661	0.83	0.34	1.25	0.81
Compound 675	3.63	0.43	-1.62	0.81
Compound 944	1.56	-0.04	0.89	0.8
Compound 216	1.67	-1.24	1.93	0.79
Compound 1052	1.55	0.75	0.04	0.78
Compound 1066	-0.26	2.86	-0.26	0.78
Compound 798	0.88	0.2	1.22	0.77
Compound 1450	0.1	0.87	1.33	0.77
Compound 212	1.49	0.79	0.01	0.76
Compound 449	3.14	0.22	-1.06	0.76
Compound 983	2.1	-1.59	1.78	0.76
Compound 1252	1.46	1.17	-0.36	0.76
Compound 1622	0.38	1.91	-0.02	0.76
Compound 190	0.79	-0.24	1.58	0.71
Compound 1059	0.8	1.1	0.24	0.71
Compound 1403	2.59	-1.43	0.97	0.71
Compound 1466	0.37	0.92	0.84	0.71
Compound 128	1.28	-0.55	1.37	0.7
Compound 251	0.89	0.38	0.83	0.7
Compound 1600	-0.34	-0.46	2.89	0.7
Compound 1005	0.46	0.32	1.3	0.69
Compound 1161	1.64	-1.12	1.57	0.69
Compound 316	0.72	0.17	1.17	0.68
Compound 840	-0.66	1.72	0.98	0.68
Compound 1006	3.25	0.18	-1.4	0.67
Compound 991	-0.29	1.92	0.36	0.66
Compound 1249	0.81	1.78	-0.61	0.66
Compound 176	-0.17	0.05	2.06	0.65
Compound 1260	0.53	-0.49	1.9	0.64
Compound 1267	0.81	0.78	0.33	0.64
Compound 1315	1.28	-0.87	1.51	0.64
Compound 1576	-1.8	2.25	1.41	0.62
Compound 892	1.35	0.79	-0.36	0.6
Compound 531	0.71	-1.51	2.52	0.58
Compound 1546	-1.5	2.63	0.54	0.56
Compound 235	1.15	0.31	0.13	0.53
Compound 606	0.93	-0.58	1.14	0.5
Compound 203	1.07	0.51	-0.13	0.48
Compound 1382	2.37	0.18	-1.16	0.46
Compound 1407	2.39	-0.16	-0.87	0.45
Compound 1501	0.85	0.38	0.1	0.44
Compound 429	1.06	0.4	-0.2	0.42
Compound 384	0.98	0.81	-0.58	0.4
Compound 1400	0.12	-1.61	2.69	0.4
Compound 1547	-0.42	-1.4	2.98	0.39
Compound 1331	-0.03	1.43	-0.37	0.35
Compound 1174	-0.66	2.6	-0.99	0.32
Compound 1199	0.33	0.22	0.33	0.29
Compound 1212	0.31	0.29	0.28	0.29
Compound 1445	0.38	0.21	0.25	0.28
Compound 1533	0.37	0.21	0.27	0.28
Compound 1693	0.34	0.31	0.19	0.28
Compound 642	0.22	0.31	0.32	0.28
Compound 1230	0.22	0.27	0.34	0.28
Compound 1370	0.35	0.22	0.26	0.28
Compound 695	0.27	-0.76	1.34	0.28
Compound 42	0.27	0.32	0.22	0.27
Compound 319	0.29	0.28	0.23	0.27
Compound 349	0.27	0.29	0.26	0.27
Compound 724	0.23	0.27	0.3	0.27
Compound 1093	0.27	0.29	0.24	0.27
Compound 137	0.31	0.23	0.27	0.27
Compound 88	1.93	-1.89	0.77	0.27
Compound 140	0.31	0.23	0.24	0.26
Compound 408	0.23	0.25	0.29	0.26
Compound 522	0.26	0.21	0.3	0.26
Compound 576	0.22	0.28	0.26	0.25
Compound 1155	0.28	0.27	0.21	0.25
Compound 1365	0.23	0.2	0.31	0.25
Compound 1603	0.27	0.24	0.24	0.25
Compound 1642	0.23	0.25	0.27	0.25
Compound 610	0.3	0.23	0.22	0.25
Compound 697	0.26	0.27	0.24	0.25
Compound 974	0.22	0.29	0.22	0.24
Compound 989	0.23	0.27	0.21	0.24
Compound 1191	0.19	0.24	0.3	0.24
Compound 1479	0.27	0.17	0.29	0.24
Compound 1680	0.21	0.26	0.25	0.24
Compound 55	0.24	0.21	0.27	0.24
Compound 483	0.24	0.22	0.22	0.23
Compound 529	0.23	0.21	0.24	0.23
Compound 687	0.26	0.17	0.26	0.23
Compound 821	0.26	0.23	0.2	0.23
Compound 927	0.21	0.2	0.29	0.23
Compound 1007	0.25	0.25	0.18	0.23
Compound 1384	0.25	0.22	0.23	0.23
Compound 1475	0.28	0.18	0.24	0.23
Compound 1548	0.22	0.21	0.26	0.23
Compound 41	0.23	0.2	0.23	0.22
Compound 339	0.19	0.22	0.25	0.22
Compound 350	0.26	0.17	0.24	0.22
Compound 1425	0.37	0.7	-0.43	0.22
Compound 784	0.2	0.22	0.2	0.21
Compound 1163	0.22	0.17	0.24	0.21
Compound 1497	0.23	0.23	0.18	0.21
Compound 1565	0.17	0.21	0.26	0.21
Compound 1627	0.16	0.26	0.2	0.21
Compound 273	0.22	0.2	0.21	0.21
Compound 770	0.19	0.25	0.19	0.21
Compound 777	0.25	0.16	0.22	0.21
Compound 872	0.24	0.14	0.23	0.2
Compound 876	0.19	0.21	0.19	0.2
Compound 1189	0.19	0.2	0.2	0.2
Compound 1346	0.15	0.22	0.22	0.2
Compound 103	0.16	0.26	0.17	0.2
Compound 263	0.25	0.19	0.15	0.2
Compound 295	0.21	0.22	0.17	0.2
Compound 573	0.19	0.22	0.18	0.2
Compound 644	0.2	0.18	0.19	0.19
Compound 1349	0.21	0.19	0.16	0.19
Compound 1380	0.19	0.19	0.2	0.19
Compound 804	0.19	0.16	0.21	0.19
Compound 820	0.23	0.17	0.17	0.19
Compound 1081	0.18	0.2	0.18	0.19
Compound 1312	0.2	0.19	0.18	0.19
Compound 1321	0.2	0.2	0.17	0.19
Compound 91	0.17	0.21	0.18	0.19
Compound 239	0.16	0.17	0.23	0.19
Compound 421	0.18	0.14	0.21	0.18
Compound 806	0.21	0.19	0.12	0.18
Compound 981	0.16	0.2	0.18	0.18
Compound 1027	0.16	0.21	0.17	0.18
Compound 1223	0.19	0.18	0.17	0.18
Compound 53	0.18	0.17	0.19	0.18
Compound 156	0.13	0.15	0.22	0.17
Compound 391	0.2	0.13	0.16	0.17
Compound 557	0.13	0.15	0.22	0.17
Compound 1092	0.13	0.22	0.17	0.17
Compound 1137	0.16	0.22	0.14	0.17
Compound 59	0.18	0.15	0.17	0.17
Compound 139	0.19	0.13	0.18	0.17
Compound 375	0.15	0.2	0.15	0.16
Compound 591	0.15	0.21	0.13	0.16
Compound 601	0.12	0.22	0.12	0.16
Compound 711	0.17	0.16	0.17	0.16
Compound 744	0.14	0.21	0.14	0.16
Compound 957	0.14	0.15	0.2	0.16
Compound 1024	0.13	0.13	0.22	0.16
Compound 1102	0.19	0.13	0.15	0.16
Compound 1148	0.11	0.19	0.15	0.15
Compound 1200	0.14	0.15	0.16	0.15
Compound 1236	0.17	0.14	0.14	0.15
Compound 1257	0.14	0.16	0.14	0.15
Compound 72	0.17	0.17	0.1	0.15
Compound 478	0.17	0.13	0.15	0.15
Compound 551	0.11	0.18	0.15	0.15
Compound 842	0.17	0.13	0.13	0.15
Compound 1121	0.62	-0.02	-0.15	0.15
Compound 1002	0.11	0.14	0.16	0.14
Compound 1025	0.15	0.15	0.13	0.14
Compound 1441	0.15	0.13	0.14	0.14
Compound 168	0.16	0.15	0.12	0.14
Compound 194	0.16	0.14	0.13	0.14
Compound 236	0.16	0.12	0.15	0.14
Compound 306	0.11	0.15	0.13	0.13
Compound 323	0.17	0.11	0.12	0.13
Compound 589	0.12	0.17	0.1	0.13
Compound 623	0.1	0.14	0.15	0.13
Compound 1130	0.14	0.14	0.12	0.13
Compound 1282	0.13	0.14	0.12	0.13
Compound 1320	0.11	0.16	0.12	0.13
Compound 1523	0.1	0.11	0.13	0.12
Compound 1682	0.11	0.12	0.12	0.12
Compound 258	0.1	0.11	0.13	0.11
Compound 282	0.09	0.13	0.11	0.11
Compound 414	0.11	0.09	0.11	0.11
Compound 519	0.11	0.11	0.11	0.11
Compound 567	0.1	0.1	0.1	0.1
Compound 650	0.08	0.11	0.12	0.1
Compound 754	0.1	0.11	0.09	0.1
Compound 945	0.08	0.09	0.08	0.09
Compound 985	0.08	0.08	0.12	0.09
Compound 1047	0.07	0.08	0.1	0.09
Compound 1183	0.11	0.08	0.09	0.09
Compound 1241	0.1	0.06	0.11	0.09
Compound 210	0.11	0.07	0.11	0.09
Compound 256	0.08	0.09	0.11	0.09
Compound 292	0.1	0.1	0.06	0.09
Compound 547	0.1	0.1	0.07	0.09
Compound 738	0.1	0.08	0.09	0.09
Compound 326	-0.27	1.46	-0.91	0.09
Compound 1185	0.08	0.1	0.07	0.08
Compound 1228	0.06	0.09	0.08	0.08
Compound 1409	0.08	0.08	0.08	0.08
Compound 1470	0.08	0.08	0.09	0.08
Compound 1581	0.08	0.09	0.08	0.08
Compound 1345	0.62	-1.41	1.03	0.08
Compound 1730	0.06	0.08	0.08	0.07
Compound 267	0.08	0.07	0.08	0.07
Compound 363	0.06	0.08	0.06	0.07
Compound 372	0.08	0.06	0.09	0.07
Compound 748	0.07	0.06	0.09	0.07
Compound 832	0.07	0.06	0.07	0.07
Compound 1060	0.05	0.08	0.09	0.07
Compound 1248	0.05	0.07	0.06	0.06
Compound 1251	0.07	0.07	0.05	0.06
Compound 1628	0.05	0.05	0.07	0.06
Compound 62	0.06	0.05	0.06	0.06
Compound 206	0.05	0.05	0.05	0.05
Compound 878	0.04	0.05	0.06	0.05
Compound 1301	0.07	0.05	0.05	0.05
Compound 1664	0.06	0.06	0.05	0.05
Compound 918	0.04	0.05	0.05	0.05
Compound 993	0.05	0.06	0.06	0.05
Compound 1096	0.04	0.05	0.05	0.04
Compound 1111	0.04	0.04	0.03	0.04
Compound 1440	0.05	0.04	0.04	0.04
Compound 1584	0.05	0.05	0.03	0.04
Compound 1620	0.03	0.03	0.04	0.04
Compound 602	0.18	-0.16	0.1	0.04
Compound 381	0.03	0.03	0.03	0.03
Compound 470	0.03	0.03	0.03	0.03
Compound 952	0.03	0.03	0.03	0.03
Compound 1509	0.03	0.02	0.02	0.02
Compound 232	0.02	0.02	0.01	0.02
Compound 371	0.02	0.02	0.02	0.02
Compound 433	0.02	0.02	0.02	0.02
Compound 543	0.02	0.01	0.02	0.02
Compound 731	0.03	0.02	0.03	0.02
Compound 808	0.02	0.03	0.02	0.02
Compound 1173	0.01	0.01	0.01	0.01
Compound 1205	0.01	0.01	0.01	0.01
Compound 1490	0.01	0.02	0.02	0.01
Compound 144	-0.11	0.58	-0.45	0.01
Compound 961	-0.69	-0.54	1.27	0.01
Compound 1539	-0.01	0	0	0
Compound 1684	0	0	0	0
Compound 865	-0.01	0	-0.01	0
Compound 885	0	0	0	0
Compound 1327	0	0	0	0
Compound 1455	-0.01	-0.01	-0.01	-0.01
Compound 1556	-0.01	-0.01	-0.02	-0.01
Compound 247	-0.01	-0.01	-0.01	-0.01
Compound 406	-0.01	-0.01	-0.01	-0.01
Compound 569	-0.01	-0.01	-0.02	-0.01
Compound 755	-0.02	-0.03	-0.03	-0.02
Compound 838	-0.02	-0.02	-0.03	-0.02
Compound 1549	-0.02	-0.02	-0.02	-0.02
Compound 271	-0.02	-0.02	-0.02	-0.02
Compound 307	-0.02	-0.02	-0.02	-0.02
Compound 432	-0.02	-0.02	-0.01	-0.02
Compound 728	-0.04	-0.03	-0.04	-0.03
Compound 749	-0.03	-0.04	-0.03	-0.03
Compound 1032	-0.02	-0.04	-0.04	-0.03
Compound 1314	-0.02	-0.03	-0.03	-0.03
Compound 1416	-0.03	-0.03	-0.04	-0.03
Compound 1653	-0.03	-0.02	-0.03	-0.03
Compound 154	-0.04	-0.03	-0.03	-0.03
Compound 536	-0.04	-0.04	-0.05	-0.04
Compound 570	-0.05	-0.04	-0.04	-0.04
Compound 1325	-0.05	-0.04	-0.04	-0.04
Compound 1354	-0.04	-0.04	-0.06	-0.05
Compound 143	-0.05	-0.05	-0.05	-0.05
Compound 230	-0.05	-0.05	-0.05	-0.05
Compound 343	-0.04	-0.05	-0.04	-0.05
Compound 670	-0.07	-0.05	-0.05	-0.05
Compound 938	-0.05	-0.06	-0.07	-0.06
Compound 1195	-0.05	-0.07	-0.05	-0.06
Compound 79	-0.04	-0.06	-0.07	-0.06
Compound 165	-0.06	-0.06	-0.06	-0.06
Compound 183	-0.07	-0.06	-0.05	-0.06
Compound 454	-0.07	-0.05	-0.07	-0.06
Compound 617	-0.05	-0.06	-0.06	-0.06
Compound 881	-0.05	-0.07	-0.07	-0.06
Compound 1004	-0.05	-0.07	-0.06	-0.06
Compound 1138	-0.06	-0.05	-0.08	-0.06
Compound 1217	-0.05	-0.07	-0.06	-0.06
Compound 1518	-0.06	-0.09	-0.06	-0.07
Compound 242	-0.07	-0.06	-0.06	-0.07
Compound 659	-0.08	-0.07	-0.07	-0.07
Compound 810	-0.06	-0.07	-0.06	-0.07
Compound 864	-0.07	-0.06	-0.08	-0.07
Compound 895	-0.07	-0.09	-0.08	-0.08
Compound 921	-0.08	-0.08	-0.07	-0.08
Compound 1034	-0.07	-0.07	-0.09	-0.08
Compound 1153	-0.08	-0.08	-0.08	-0.08
Compound 1186	-0.09	-0.06	-0.07	-0.08
Compound 1207	-0.09	-0.1	-0.06	-0.09
Compound 102	-0.09	-0.09	-0.09	-0.09
Compound 122	-0.12	-0.07	-0.09	-0.09
Compound 201	-0.1	-0.09	-0.09	-0.09
Compound 861	-0.08	-0.07	-0.11	-0.09
Compound 1105	-0.06	-0.09	-0.1	-0.09
Compound 1176	-0.09	-0.09	-0.1	-0.09
Compound 1233	-0.11	-0.09	-0.1	-0.1
Compound 1410	-0.12	-0.07	-0.09	-0.1
Compound 104	-0.1	-0.09	-0.11	-0.1
Compound 330	-0.1	-0.09	-0.11	-0.1
Compound 369	-0.1	-0.1	-0.13	-0.11
Compound 637	-0.11	-0.13	-0.08	-0.11
Compound 726	-0.12	-0.12	-0.09	-0.11
Compound 1377	-0.09	-0.14	-0.09	-0.11
Compound 1561	-0.11	-0.08	-0.13	-0.11
Compound 1610	-0.13	-0.12	-0.09	-0.11
Compound 1702	-0.1	-0.14	-0.12	-0.12
Compound 434	-0.11	-0.13	-0.13	-0.12
Compound 857	-0.12	-0.11	-0.13	-0.12
Compound 886	-0.12	-0.14	-0.1	-0.12
Compound 900	-0.15	-0.11	-0.14	-0.13
Compound 1134	-0.11	-0.13	-0.15	-0.13
Compound 1167	-0.15	-0.11	-0.13	-0.13
Compound 83	-0.15	-0.11	-0.13	-0.13
Compound 402	-0.11	-0.12	-0.17	-0.13
Compound 598	-0.14	-0.1	-0.14	-0.13
Compound 626	-0.15	-0.14	-0.09	-0.13
Compound 649	-0.15	-0.14	-0.1	-0.13
Compound 1112	-0.11	-0.13	-0.15	-0.13
Compound 1428	-0.17	-0.12	-0.15	-0.14
Compound 1465	-0.1	-0.17	-0.13	-0.14
Compound 1694	-0.13	-0.14	-0.13	-0.14
Compound 459	-0.17	-0.14	-0.12	-0.14
Compound 515	-0.14	-0.12	-0.16	-0.14
Compound 663	-0.15	-0.11	-0.17	-0.14
Compound 973	-0.15	-0.15	-0.11	-0.14
Compound 1063	-0.16	-0.15	-0.11	-0.14
Compound 1182	-0.15	-0.13	-0.13	-0.14
Compound 1330	-0.1	-0.12	-0.19	-0.14
Compound 1469	-0.1	-0.13	-0.18	-0.14
Compound 99	-0.15	-0.19	-0.12	-0.15
Compound 345	-0.15	-0.13	-0.17	-0.15
Compound 348	-0.14	-0.17	-0.14	-0.15
Compound 377	-0.17	-0.13	-0.16	-0.15
Compound 660	-0.18	-0.14	-0.15	-0.16
Compound 912	-0.17	-0.16	-0.16	-0.16
Compound 1502	-0.16	-0.19	-0.15	-0.16
Compound 1689	-0.18	-0.14	-0.17	-0.16
Compound 127	-0.17	-0.16	-0.19	-0.17
Compound 318	-0.14	-0.2	-0.16	-0.17
Compound 604	-0.18	-0.21	-0.13	-0.17
Compound 1014	-0.19	-0.15	-0.17	-0.17
Compound 1343	-0.16	-0.24	-0.13	-0.18
Compound 1468	-0.13	-0.2	-0.21	-0.18
Compound 1545	-0.15	-0.19	-0.19	-0.18
Compound 1559	-0.23	-0.16	-0.16	-0.18
Compound 74	-0.23	-0.15	-0.16	-0.18
Compound 300	-0.16	-0.17	-0.22	-0.18
Compound 441	-0.17	-0.16	-0.21	-0.18
Compound 677	-0.15	-0.16	-0.22	-0.18
Compound 785	-0.16	-0.18	-0.2	-0.18
Compound 822	-0.18	-0.19	-0.2	-0.19
Compound 941	-0.21	-0.17	-0.18	-0.19
Compound 1135	-0.15	-0.21	-0.22	-0.19
Compound 1178	-0.22	-0.13	-0.22	-0.19
Compound 1219	-0.15	-0.2	-0.23	-0.2
Compound 1322	-0.22	-0.18	-0.21	-0.2
Compound 1713	-0.2	-0.18	-0.21	-0.2
Compound 544	-0.21	-0.16	-0.22	-0.2
Compound 590	-0.16	-0.22	-0.22	-0.2
Compound 708	-0.18	-0.19	-0.24	-0.2
Compound 742	-0.21	-0.22	-0.18	-0.2
Compound 1090	-0.22	-0.21	-0.2	-0.21
Compound 1097	-0.14	-0.25	-0.24	-0.21
Compound 329	-0.7	-0.57	-0.48	-0.58
Compound 455	-0.61	-0.69	-0.48	-0.59
Compound 803	-0.62	-0.65	-0.51	-0.59
Compound 897	-0.53	-0.77	-0.47	-0.59
Compound 976	-0.57	-0.63	-0.57	-0.59
Compound 984	-0.64	-0.67	-0.47	-0.59
Compound 1015	-0.71	-0.48	-0.61	-0.6
Compound 1256	-0.65	-0.45	-0.71	-0.6
Compound 1302	-0.77	-0.51	-0.56	-0.61
Compound 1309	-0.66	-0.5	-0.65	-0.61
Compound 123	-0.69	-0.64	-0.5	-0.61
Compound 146	-0.56	-0.52	-0.74	-0.61
Compound 198	-0.61	-0.68	-0.54	-0.61
Compound 562	-0.56	-0.74	-0.54	-0.61
Compound 795	-0.55	-0.64	-0.66	-0.62
Compound 816	-0.81	-0.49	-0.56	-0.62
Compound 1019	-0.49	-0.66	-0.74	-0.63
Compound 1077	-0.48	-0.72	-0.7	-0.63
Compound 1049	-0.82	-0.77	-0.5	-0.7
Compound 1053	-0.64	-0.73	-0.72	-0.7
Compound 1606	-0.67	-0.69	-0.76	-0.7
Compound 1607	-0.68	-0.81	-0.6	-0.7
Compound 1054	-0.53	-0.76	-0.81	-0.7
Compound 1118	-0.81	-0.63	-0.67	-0.7
Compound 1146	-0.72	-0.58	-0.79	-0.7
Compound 1218	-0.66	-0.71	-0.76	-0.71
Compound 1337	-0.77	-0.73	-0.62	-0.71
Compound 1454	-0.72	-0.6	-0.81	-0.71
Compound 1605	-0.72	-0.63	-0.78	-0.71
Compound 1647	-0.64	-0.53	-0.96	-0.71
Compound 112	-0.87	-0.64	-0.63	-0.71
Compound 504	-0.62	-0.85	-0.66	-0.71
Compound 666	-0.77	-0.79	-0.58	-0.71
Compound 688	-0.74	-0.79	-0.63	-0.72
Compound 694	-0.52	-0.89	-0.75	-0.72
Compound 891	-0.82	-0.61	-0.74	-0.72
Compound 954	-0.83	-0.65	-0.68	-0.72
Compound 1139	-0.77	-0.72	-0.7	-0.73
Compound 1422	-0.81	-0.84	-0.53	-0.73
Compound 1494	-0.79	-0.65	-0.75	-0.73
Compound 1510	-0.84	-0.67	-0.69	-0.73
Compound 89	-0.72	-0.85	-0.64	-0.73
Compound 407	-0.72	-0.73	-0.75	-0.73
Compound 631	-0.67	-0.74	-0.77	-0.73
Compound 652	-0.66	-0.65	-0.87	-0.73
Compound 684	-0.66	-0.92	-0.6	-0.73
Compound 774	-0.69	-0.9	-0.63	-0.74
Compound 894	-0.78	-0.65	-0.79	-0.74
Compound 910	-0.61	-0.76	-0.85	-0.74
Compound 1065	-0.59	-0.84	-0.79	-0.74
Compound 1209	-0.86	-0.84	-0.52	-0.74
Compound 1250	-0.72	-0.66	-0.84	-0.74
Compound 1415	-0.93	-0.51	-0.82	-0.75
Compound 1531	-0.74	-0.87	-0.65	-0.75
Compound 1613	-0.65	-0.88	-0.72	-0.75
Compound 209	-0.61	-0.94	-0.68	-0.75
Compound 335	-0.87	-0.57	-0.8	-0.75
Compound 807	-0.82	-0.67	-0.82	-0.77
Compound 1340	-0.89	-0.65	-0.76	-0.77
Compound 1673	-0.58	-0.78	-0.97	-0.78
Compound 1727	-0.77	-0.77	-0.8	-0.78
Compound 76	-0.98	-0.62	-0.74	-0.78
Compound 86	-0.84	-0.91	-0.58	-0.78
Compound 380	-0.65	-1.02	-0.66	-0.78
Compound 634	-0.6	-0.85	-0.88	-0.78
Compound 797	-0.86	-0.69	-0.83	-0.79
Compound 1029	-0.72	-0.84	-0.8	-0.79
Compound 1058	-0.66	-1.04	-0.68	-0.79
Compound 1175	-0.63	-0.88	-0.85	-0.79
Compound 1389	-0.86	-0.78	-0.72	-0.79
Compound 1586	-0.85	-0.86	-0.65	-0.79
Compound 1593	-0.84	-0.6	-0.93	-0.79
Compound 1595	-0.61	-0.78	-0.97	-0.79
Compound 1677	-0.64	-0.85	-0.87	-0.79
Compound 84	-0.75	-0.75	-0.89	-0.8
Compound 180	-0.8	-0.92	-0.68	-0.8
Compound 197	-0.85	-0.9	-0.66	-0.8
Compound 214	-0.72	-0.77	-0.9	-0.8
Compound 545	-0.86	-0.88	-0.66	-0.8
Compound 852	-0.97	-0.71	-0.74	-0.81
Compound 1123	-0.68	-0.87	-0.88	-0.81
Compound 1663	-1	-0.76	-0.68	-0.81
Compound 220	-0.72	-0.89	-0.82	-0.81
Compound 303	-0.86	-0.65	-0.93	-0.81
Compound 427	-0.75	-0.88	-0.81	-0.81
Compound 563	-0.82	-0.6	-1.02	-0.81
Compound 612	-0.85	-0.81	-0.76	-0.81
Compound 786	-0.68	-0.91	-0.85	-0.82
Compound 1003	-1.03	-0.73	-0.71	-0.82
Compound 1117	-1.01	-0.69	-0.75	-0.82
Compound 1265	-0.8	-0.77	-0.92	-0.83
Compound 1390	-0.84	-0.72	-0.93	-0.83
Compound 177	-0.89	-0.91	-0.69	-0.83
Compound 233	-0.62	-0.87	-1.01	-0.83
Compound 301	-0.72	-1.07	-0.71	-0.83
Compound 678	-0.73	-0.87	-0.88	-0.83
Compound 854	-0.89	-0.64	-0.94	-0.83
Compound 955	-0.95	-0.9	-0.66	-0.84
Compound 1202	-0.76	-0.97	-0.77	-0.84
Compound 1226	-0.9	-0.8	-0.81	-0.84
Compound 1227	-0.87	-0.82	-0.84	-0.84
Compound 1639	-0.65	-0.96	-0.91	-0.84
Compound 171	-1.01	-0.6	-0.92	-0.84
Compound 249	-0.94	-0.72	-0.88	-0.85
Compound 763	-1.04	-0.86	-0.94	-0.94
Compound 829	-0.85	-1.18	-0.8	-0.94
Compound 908	-0.74	-1.09	-0.99	-0.94
Compound 1079	-0.89	-1.01	-0.94	-0.95
Compound 1083	-0.77	-1.07	-1	-0.95
Compound 1364	-0.88	-0.86	-1.1	-0.95
Compound 1397	-1.08	-1.03	-0.75	-0.95
Compound 1537	-0.79	-1.04	-1.02	-0.95
Compound 151	-0.83	-1.01	-1.02	-0.95
Compound 494	-0.79	-1.08	-1.02	-0.96
Compound 704	-1.01	-0.89	-0.98	-0.96
Compound 730	-1.1	-1.01	-0.79	-0.96
Compound 923	-0.82	-0.84	-1.22	-0.96
Compound 1021	-1.1	-0.82	-0.96	-0.96
Compound 1122	-1.14	-0.7	-1.04	-0.96
Compound 1170	-0.99	-1.05	-0.83	-0.96
Compound 1213	-1.12	-0.81	-0.99	-0.97
Compound 1351	-0.82	-1.15	-0.94	-0.97
Compound 1536	-0.76	-1.18	-0.98	-0.97
Compound 1652	-1.12	-0.81	-0.98	-0.97
Compound 48	-1.08	-0.81	-1.02	-0.97
Compound 226	-0.89	-0.86	-1.15	-0.97
Compound 270	-1.05	-0.78	-1.07	-0.97
Compound 311	-1.25	-0.86	-0.8	-0.97
Compound 405	-0.91	-1.02	-0.97	-0.97
Compound 479	-0.78	-1.24	-0.87	-0.97
Compound 492	-1.21	-0.93	-0.8	-0.98
Compound 1080	-0.96	-1.05	-0.92	-0.98
Compound 1279	-0.94	-0.88	-1.11	-0.98
Compound 1369	-1.08	-0.7	-1.15	-0.98
Compound 1480	-1.01	-1.22	-0.71	-0.98
Compound 1731	-1.18	-0.99	-0.77	-0.98
Compound 564	-1.06	-1.03	-0.88	-0.99
Compound 1356	-1.05	-0.96	-0.96	-0.99
Compound 1733	-0.9	-0.91	-1.16	-0.99
Compound 237	-0.82	-1.07	-1.12	-1
Compound 243	-1.14	-0.68	-1.19	-1
Compound 253	-1.22	-0.79	-1	-1
Compound 357	-0.97	-1.01	-1.04	-1
Compound 401	-1.1	-0.95	-0.94	-1
Compound 404	-1.05	-1.19	-0.76	-1
Compound 574	-1.04	-0.79	-1.2	-1.01
Compound 903	-1.16	-0.78	-1.1	-1.01
Compound 975	-0.96	-1.11	-0.96	-1.01
Compound 1285	-1	-1.08	-0.97	-1.01
Compound 1376	-1.17	-0.82	-1.03	-1.01
Compound 1386	-0.91	-1.18	-0.98	-1.02
Compound 1557	-0.89	-0.99	-1.18	-1.02
Compound 47	-1.1	-0.79	-1.18	-1.02
Compound 49	-0.99	-0.96	-1.12	-1.02
Compound 52	-0.81	-1.03	-1.23	-1.02
Compound 425	-0.91	-1.03	-1.15	-1.03
Compound 477	-1.3	-0.78	-1.01	-1.03
Compound 581	-0.86	-1.35	-0.88	-1.03
Compound 628	-1.06	-1.04	-0.99	-1.03
Compound 733	-1.1	-0.83	-1.18	-1.03
Compound 746	-1.1	-1.11	-0.91	-1.04
Compound 873	-1.05	-0.99	-1.1	-1.04
Compound 1045	-0.86	-1.39	-0.88	-1.04
Compound 1091	-1.07	-1.09	-0.98	-1.05
Compound 1324	-1.21	-0.88	-1.06	-1.05
Compound 1504	-1.08	-0.73	-1.33	-1.05
Compound 1528	-1.13	-0.96	-1.06	-1.05
Compound 1568	-1.24	-0.73	-1.19	-1.05
Compound 1665	-1.24	-0.98	-0.93	-1.05
Compound 1716	-1.06	-0.95	-1.16	-1.06
Compound 98	-0.84	-0.84	-1.48	-1.06
Compound 280	-1.16	-1.12	-0.89	-1.06
Compound 516	-1.11	-1.19	-0.89	-1.06
Compound 537	-1.17	-0.91	-1.11	-1.06
Compound 597	-1.39	-0.98	-0.8	-1.06
Compound 698	-0.92	-1.26	-1	-1.06
Compound 705	-1.1	-0.93	-1.14	-1.06
Compound 1214	-1.26	-1.17	-0.74	-1.06
Compound 1342	-0.77	-1.38	-1.06	-1.07
Compound 1383	-1.19	-1.11	-0.92	-1.07
Compound 1596	-1.02	-1.27	-0.92	-1.07
Compound 124	-1.07	-0.88	-1.27	-1.07
Compound 218	-1.22	-1.11	-0.88	-1.07
Compound 238	-1.26	-0.97	-1	-1.07
Compound 272	-1.11	-1.22	-0.88	-1.07
Compound 325	-0.94	-1.2	-1.09	-1.08
Compound 656	-1.34	-0.92	-0.97	-1.08
Compound 741	-1.28	-0.95	-1.01	-1.08
Compound 757	-1.33	-0.89	-1.01	-1.08
Compound 1141	-1.11	-0.93	-1.2	-1.08
Compound 1521	-0.93	-1.32	-0.99	-1.08
Compound 1598	-1.11	-1.11	-1.03	-1.08
Compound 129	-1.05	-1.09	-1.1	-1.08
Compound 149	-1.34	-0.94	-0.94	-1.08
Compound 231	-1.35	-0.91	-1	-1.09
Compound 240	-1.06	-1.11	-1.1	-1.09
Compound 668	-1.84	-1.2	-1.17	-1.41
Compound 714	-1.33	-1.21	-1.74	-1.42
Compound 827	-1.23	-1.42	-1.62	-1.42
Compound 888	-1.58	-1.43	-1.24	-1.42
Compound 1262	-1.4	-1.71	-1.17	-1.43
Compound 1644	-1.54	-1.4	-1.39	-1.44
Compound 1692	-1.52	-1.47	-1.33	-1.44
Compound 458	-1.54	-1.05	-1.73	-1.44
Compound 920	-1.21	-1.65	-1.45	-1.44
Compound 1319	-1.34	-1.55	-1.43	-1.44
Compound 1329	-1.66	-1.6	-1.1	-1.45
Compound 1332	-1.83	-1.35	-1.18	-1.45
Compound 1650	-1.9	-1.35	-1.1	-1.45
Compound 1729	-1.44	-1.72	-1.2	-1.45
Compound 61	-1.57	-1.15	-1.64	-1.45
Compound 511	-1.12	-1.77	-1.46	-1.45
Compound 167	-1	-1.7	-1.66	-1.45
Compound 186	-1.44	-1.49	-1.43	-1.45
Compound 607	-1.39	-1.46	-1.51	-1.46
Compound 1274	-1.37	-1.44	-1.58	-1.46
Compound 1305	-1.93	-1.3	-1.16	-1.46
Compound 1567	-1.21	-1.56	-1.65	-1.47
Compound 527	-1.13	-1.57	-1.72	-1.47
Compound 1726	-1.57	-1.37	-1.46	-1.47
Compound 138	-1.55	-1.35	-1.51	-1.47
Compound 147	-1.63	-1.43	-1.36	-1.47
Compound 157	-1.2	-1.46	-1.76	-1.47
Compound 1177	-1.51	-1.05	-1.89	-1.48
Compound 1287	-1.84	-1.21	-1.38	-1.48
Compound 1519	-1.88	-1.32	-1.25	-1.48
Compound 1614	-1.63	-1.19	-1.62	-1.48
Compound 1681	-1.2	-1.81	-1.43	-1.48
Compound 75	-1.06	-1.53	-1.85	-1.48
Compound 223	-1.03	-1.56	-1.86	-1.48
Compound 701	-1.31	-1.65	-1.46	-1.48
Compound 1020	-1.68	-1.55	-1.25	-1.49
Compound 1210	-1.74	-1.62	-1.13	-1.49
Compound 1431	-1.66	-1.65	-1.17	-1.49
Compound 442	-1.5	-1.67	-1.33	-1.5
Compound 555	-1.38	-1.29	-1.84	-1.5
Compound 651	-1.29	-1.52	-1.7	-1.5
Compound 869	-1.6	-1.73	-1.18	-1.5
Compound 1152	-1.71	-1.66	-1.14	-1.5
Compound 1271	-1.8	-1.63	-1.12	-1.51
Compound 1723	-1.5	-1.45	-1.59	-1.51
Compound 43	-1.25	-1.76	-1.53	-1.51
Compound 1057	-1.49	-1.15	-1.89	-1.51
Compound 1086	-1.86	-1.34	-1.33	-1.51
Compound 1447	-1.28	-1.45	-1.82	-1.52
Compound 179	-1.5	-1.39	-1.67	-1.52
Compound 949	-1.83	-1.59	-1.15	-1.52
Compound 1284	-1.37	-1.41	-1.77	-1.52
Compound 1402	-1.66	-1.65	-1.24	-1.52
Compound 1659	-1.41	-1.57	-1.6	-1.52
Compound 45	-1.16	-1.45	-2	-1.53
Compound 73	-2.04	-1.18	-1.36	-1.53
Compound 457	-1.62	-1.52	-1.44	-1.53
Compound 759	-1.35	-1.63	-1.64	-1.54
Compound 1436	-1.55	-1.45	-1.62	-1.54
Compound 1458	-1.93	-1.37	-1.33	-1.54
Compound 1643	-1.48	-1.56	-1.57	-1.54
Compound 96	-1.5	-1.66	-1.45	-1.54
Compound 556	-1.37	-1.79	-1.48	-1.55
Compound 627	-1.48	-1.5	-1.66	-1.55
Compound 735	-1.6	-1.57	-1.48	-1.55
Compound 1261	-1.44	-1.46	-1.75	-1.55
Compound 1592	-1.74	-1.14	-1.79	-1.55
Compound 244	-1.21	-1.74	-1.72	-1.56
Compound 482	-1.49	-1.38	-1.81	-1.56
Compound 765	-1.46	-1.47	-1.75	-1.56
Compound 1169	-1.22	-1.54	-1.92	-1.56
Compound 1367	-1.26	-1.51	-1.92	-1.56
Compound 667	-1.97	-1.55	-1.17	-1.56
Compound 737	-1.56	-1.48	-1.68	-1.57
Compound 782	-1.91	-1.62	-1.19	-1.57
Compound 844	-1.5	-1.68	-1.57	-1.58
Compound 855	-2.01	-1.13	-1.61	-1.58
Compound 930	-1.37	-1.7	-1.67	-1.58
Compound 933	-1.73	-1.19	-1.83	-1.58
Compound 1208	-1.19	-1.76	-1.78	-1.58
Compound 1435	-1.69	-1.42	-1.62	-1.58
Compound 1604	-1.26	-1.77	-1.73	-1.59
Compound 1705	-1.39	-1.43	-1.95	-1.59
Compound 192	-1.35	-1.73	-1.69	-1.59
Compound 308	-1.16	-1.95	-1.66	-1.59
Compound 376	-1.15	-1.59	-2.05	-1.6
Compound 790	-1.43	-1.86	-1.53	-1.6
Compound 851	-1.37	-1.41	-2.02	-1.6
Compound 929	-1.89	-1.15	-1.77	-1.6
Compound 964	-1.55	-1.58	-1.66	-1.6
Compound 1150	-1.62	-1.8	-1.38	-1.6
Compound 1162	-1.86	-1.23	-1.72	-1.61
Compound 398	-1.49	-1.74	-1.61	-1.61
Compound 453	-1.33	-1.73	-1.77	-1.61
Compound 673	-1.79	-1.45	-1.59	-1.61
Compound 681	-1.59	-1.7	-1.57	-1.62
Compound 818	-1.51	-1.45	-1.9	-1.62
Compound 1140	-1.41	-1.71	-1.78	-1.63
Compound 1156	-1.83	-1.66	-1.39	-1.63
Compound 1355	-1.59	-1.51	-1.8	-1.63
Compound 1388	-1.56	-1.84	-1.52	-1.64
Compound 1476	-1.79	-1.54	-1.6	-1.64
Compound 1625	-1.31	-1.82	-1.8	-1.64
Compound 170	-1.5	-1.79	-1.64	-1.64
Compound 395	-1.73	-1.54	-1.65	-1.64
Compound 794	-1.25	-1.63	-2.05	-1.64
Compound 1544	-1.23	-1.86	-1.86	-1.65
Compound 259	-1.34	-1.85	-1.78	-1.66
Compound 558	-1.77	-1.55	-1.68	-1.67
Compound 669	-1.53	-1.53	-1.95	-1.67
Compound 1426	-1.15	-2	-1.87	-1.67
Compound 153	-1.64	-1.59	-1.79	-1.67
Compound 284	-1.65	-1.64	-1.76	-1.68
Compound 1472	-1.39	-1.55	-2.1	-1.68
Compound 1505	-1.99	-1.47	-1.57	-1.68
Compound 131	-1.78	-1.43	-1.85	-1.69
Compound 169	-1.78	-1.69	-1.6	-1.69
Compound 624	-1.86	-1.57	-1.65	-1.69
Compound 643	-1.59	-1.64	-1.84	-1.69
Compound 706	-2.05	-1.58	-1.46	-1.69
Compound 1022	-1.83	-1.74	-1.52	-1.7
Compound 1050	-1.74	-2	-1.36	-1.7
Compound 1136	-1.47	-1.96	-1.68	-1.7
Compound 1308	-1.68	-1.79	-1.65	-1.71
Compound 1660	-1.55	-1.67	-1.95	-1.72
Compound 90	-2.02	-1.54	-1.59	-1.72
Compound 423	-2.06	-1.4	-1.69	-1.72
Compound 788	-1.95	-1.27	-1.96	-1.73
Compound 883	-1.88	-1.55	-1.75	-1.73
Compound 1188	-1.83	-1.66	-1.7	-1.73
Compound 1496	-1.35	-1.93	-1.93	-1.74
Compound 848	-1.69	-1.75	-1.81	-1.75
Compound 1018	-1.63	-1.8	-1.83	-1.75
Compound 1374	-2.16	-1.79	-1.3	-1.75
Compound 1399	-1.8	-1.83	-1.62	-1.75
Compound 69	-1.5	-1.87	-1.89	-1.76
Compound 700	-1.93	-1.32	-2.08	-1.77
Compound 858	-1.83	-1.49	-2.03	-1.78
Compound 932	-1.91	-1.76	-1.7	-1.79
Compound 1038	-1.72	-1.72	-1.97	-1.8
Compound 1446	-1.94	-1.48	-2.01	-1.81
Compound 1471	-1.88	-1.81	-1.73	-1.81
Compound 182	-1.44	-2.03	-2.01	-1.82
Compound 732	-1.66	-1.99	-1.8	-1.82
Compound 1215	-1.85	-1.73	-1.91	-1.83
Compound 1242	-1.55	-1.88	-2.1	-1.84
Compound 1296	-2.18	-1.96	-1.41	-1.85
Compound 1401	-1.61	-1.98	-2.06	-1.88
Compound 1583	-1.97	-1.93	-1.79	-1.9
Compound 1700	-1.89	-2	-1.85	-1.91
Compound 387	-1.92	-2.08	-1.72	-1.91
Compound 1151	-1.87	-1.95	-1.92	-1.91
Compound 248	-2.16	-1.5	-2.19	-1.95
Compound 1304	-2.1	-2.8	-1.7	-2.2
Compound 1404	-2.43	-1.66	-2.5	-2.2
Compound 1433	-1.96	-2.55	-2.08	-2.2
Compound 1474	-2.45	-1.63	-2.53	-2.2
Compound 1589	-2.21	-2.56	-1.83	-2.2
Compound 535	-2.21	-2.53	-1.89	-2.21
Compound 717	-2.11	-2.22	-2.29	-2.21
Compound 796	-2.38	-2.64	-1.62	-2.21
Compound 521 (S8018)	-2.98	-2.48	-2.25	-2.57
Compound 1563 (S6744)	-2.56	-3.08	-2.07	-2.57
Compound 1001 (S5254)	-2.17	-3.12	-2.45	-2.58
Compound 1238 (S5508)	-2.18	-2.66	-2.9	-2.58
Compound 1259 (S2226)	-2.72	-2.35	-2.71	-2.59
Compound 1069 (S5003)	-2.28	-2.81	-3.82	-2.97
Compound 451 (S5070)	-2.58	-2.48	-3.85	-2.97
Compound 1051 (S4248)	-2.83	-3.37	-2.72	-2.97
Compound 1247 (S1378)	-2.11	-3.03	-3.78	-2.97
