# Supplementary material for: Bortezomib Enhances CD70 CAR-T Cell Therapy in Sunitinib Resistant Renal Cell Carcinoma by Inducing Mitochondrial DNA Mediated cGAS-STING Activation
Source: Research Square preprint supplement (doi:10.21203/rs.3.rs-8078134/v1), 2025-11-25
Supplement: Supplementary file 2 [file 70f3439d7c01c71961a969ca.xlsx]

## Sheet: Sheet1
Primers sequence used in this study, related to STAR Methods
Name	Forward	Reverse
Vdac1	5’-ACTAATGTGAATGACGGGACA-3’	5’-GCATTGACGTTCTTGCCAT-3’
Tert	5’- CTAGCTCATGTGTCAAGACCCTCTT-3’	5’-GCCAGCACGTTTCTCTCGTT-3’
Dloop	5’-TCCTCCGTGAAACCAACAA-3’	5’-AGCGAGAAGAGGGGCATT-3’
ActB	5’-GATGCACAGTAGGTCTAAGTGGAG-3’	5’-CACTCAGGGCAGGTGAAACT-3’
Cox1	5’-GCCCCAGATATAGCATTCCC-3’	5’-GTTCATCCTGTTCCTGCTCC-3’
Human LINE1	5’-TCACTCAAAGCCGCTCAACTAC-3’	5’-TCTGCCTTCATTTCGTTATGTACC-3’
Human ND1	5’-ATACCCATGGCCAACCTCCT-3’	5’-GGGCCTTTGCGTAGTTGTAT-3’
