# Supplementary material for: Bortezomib Enhances CD70 CAR-T Cell Therapy in Sunitinib Resistant Renal Cell Carcinoma by Inducing Mitochondrial DNA Mediated cGAS-STING Activation
Source: Research Square preprint supplement (doi:10.21203/rs.3.rs-8078134/v1), 2025-11-25
Supplement: Supplementary file 3 [file d1933bd35ab03ddd54ecb304.xlsx]

## Sheet: General Information
			FDA approved Anticancer Drug Library (96-well)-L8000
	For more information on Selleck library service, please contact us via +1-832-582-8158 or library@selleckchem.com
	Product Details:
	Description		A unique collection of 1733 compounds
	Container		96 Well
	Stability		12 months | ﹣20°C | in DMSO
			24 months | ﹣80°C | in DMSO
	Shipping		Blue ice or Dry ice
	Formulation		Solubility ≥10 mM pre-dissolved in 10 mM solution and solubility between 2 mM and 10 mM pre-dissolved in 2 mM solution
			In 10 mM DMSO: Plate Layout L8000-01~20; In 2 mM DMSO: Plate Layout L8000-23 In 10 mM Water: Plate Layout L8000-21~22; In 2 mM Water: Plate Layout L8000-24
	Plate layout: L8000-01
		1	2	3	4	5	6	7	8	9	10	11	12
	a	Empty	S1005	S1022	S1039	S1064	S1144	S1185	S1197	S1209	S1223	S1238	Empty
			Axitinib (AG 013736)	Ridaforolimus (Deforolimus, MK-8669)	Rapamycin (AY-22989)	Masitinib (AB1010)	Ivacaftor (VX-770)	Ritonavir (ABT-538)	Finasteride	Fluorouracil (5-Fluorouracil, 5-FU)	Epirubicin (IMI 28) HCl	Tamoxifen (ICI 46474)
	b	Empty	S1007	S1025	S1040	S1068	S1148	S1188	S1199	S1210	S1225	S1241	Empty
			Roxadustat (FG-4592)	Gefitinib (ZD1839)	Sorafenib (BAY 43-9006) tosylate	Crizotinib (PF-02341066)	Docetaxel (RP56976)	Anastrozole (ZD-1033)	Cladribine (RWJ 26251)	Methotrexate (CL-14377)	Etoposide (VP-16)	Vincristine (NSC-67574) sulfate
	c	Empty	S1008	S1026	S1042	S1082	S1150	S1189	S1200	S1212	S1227	S1243	Empty
			Selumetinib (AZD6244)	Imatinib (STI571) Mesylate	Sunitinib (SU11248) malate	Vismodegib (GDC-0449)	Paclitaxel (NSC 125973)	Aprepitant (MK-0869)	Decitabine (NSC 127716)	Bendamustine (SDX105) HCl	Raloxifene HCl	Agomelatine (S20098)
	d	Empty	S1010	S1028	S1044	S1085	S1156	S1190	S1202	S1213	S1229	S1245	Empty
			Nintedanib (BIBF 1120)	Lapatinib (GW-572016) Ditosylate	Temsirolimus (CCI-779)	Belinostat (PXD101)	Capecitabine (RO 09-1978)	Bicalutamide (ICI-176334)	Dutasteride	Nelarabine	Fludarabine Phosphate	Latrepirdine 2HCl
	e	Empty	S1011	S1029	S1047	S1098	S1162	S1191	S1204	S1214	S1231	S1247	Empty
			Afatinib (BIBW2992)	Lenalidomide (CC-5013)	Vorinostat (SAHA)	Rucaparib (AG-014699) phosphate	Pretomanid (PA-824)	Fulvestrant (ICI-182780)	Melatonin (NSC 113928)	Bleomycin (NSC125066) sulfate	Topotecan (NSC609699) HCl	Leflunomide (HWA486)
	f	Empty	S1013	S1030	S1053	S1119	S1164	S1192	S1206	S1218	S1233	S1250	Empty
			Bortezomib (PS-341)	Panobinostat (LBH589)	Entinostat (MS-275)	Cabozantinib (BMS-907351)	Lenvatinib (E7080)	Raltitrexed	Bisoprolol fumarate	Clofarabine	2-Methoxyestradiol (2-MeOE2)	Enzalutamide (MDV3100)
	g	Empty	S1014	S1033	S1055	S1120	S1168	S1193	S1207	S1221	S1235	S1251	Empty
			Bosutinib (SKI-606)	Nilotinib (AMN-107)	Enzastaurin (LY317615)	Everolimus (RAD001)	Valproic Acid (NSC 93819) sodium salt	Thalidomide (K17)	Tivozanib (AV-951)	Dacarbazine (NSC-45388)	Letrozole (CGS 20267)	Dienogest
	h	Empty	S1021	S1035	S1060	S1137	S1178	S1196	S1208	S1222	S1237	S1255	Empty
			Dasatinib (BMS-354825)	Pazopanib HCl (GW786034 HCl)	Olaparib (AZD2281)	Malotilate	Regorafenib (BAY 73-4506)	Exemestane (FCE 24304)	Doxorubicin (Adriamycin) HCl	Dexrazoxane HCl (ICRF-187)	Temozolomide (CCRG 81045)	Nepafenac
	Plate layout: L8000-02
		1	2	3	4	5	6	7	8	9	10	11	12
	a	Empty	S1257	S1280	S1294	S1322	S1333	S1357	S1378	S1393	S1405	S1432	Empty
			Posaconazole (SCH 56592)	Amisulpride	Cilostazol (OPC-13013)	Dexamethasone (MK-125)	Fluoxetine (Lilly 110140) HCl	Lidocaine	Ruxolitinib (INCB018424)	Pirarubicin (NSC-333054)	Vecuronium Bromide	Sumatriptan Succinate
	b	Empty	S1259	S1281	S1299	S1324	S1334	S1358	S1379	S1394	S1407	Empty	Empty
			Ramelteon	Aniracetam	Floxuridine (NSC 27640)	Doxazosin Mesylate	Flupirtine maleate	Loratadine (SCH29851)	Isotretinoin	Pizotifen Malate	Bimatoprost
	c	Empty	S1260	S1282	S1300	S1326	S1336	S1359	S1385	S1396	S1408	S1437	Empty
			Cinacalcet (AMG-073) HCl	Artemisinin	Tegafur (FT-207)	Edaravone	Fluvoxamine (DU-23000) maleate	Losartan Potassium (DuP 753)	Mosapride Citrate	Resveratrol (SRT501)	Linezolid (PNU-100766)	Tizanidine HCl
	d	Empty	S1261	S1283	S1302	S1328	S1340	S1367	S1386	S1397	S1409	S1438	Empty
			Celecoxib (SC 58635)	Asenapine maleate	Ifosfamide (NSC109724)	Etodolac	Gatifloxacin	Amonafide	Nafamostat mesilate (FUT-175)	Rocuronium Bromide	Alfuzosin HCl	Topiramate
	e	Empty	S1267	S1284	S1304	Empty	S1342	S1368	S1387	S1398	S1425	S1439	Empty
			Vemurafenib (PLX4032)	Benazepril HCl	Megestrol Acetate		Genistein (NPI 031L)	Acitretin	Naftopidil DiHCl	Stavudine (d4T)	Ranolazine 2HCl	Tranilast (SB 252218)
	f	Empty	S1271	S1287	S1305	S1330	S1344	S1373	S1389	S1401	S1426	S1441	Empty
			Acarbose	Bumetanide	Mercaptopurine (6-MP)	Felbamate	Glimepiride	Daptomycin (LY146032)	Omeprazole	Tenofovir	Repaglinide	Venlafaxine HCl
	g	Empty	S1276	S1289	Empty	S1331	S1351	S1376	S1390	S1403	S1430	S1442	Empty
			Adapalene	Carmofur		Fluconazole (UK 49858)	Ivermectin (MK-933)	Gestodene	Ondansetron HCl	Tigecycline (GAR-936)	Rolipram (ZK-62711)	Voriconazole (UK-109496)
	h	Empty	S1278	S1291	S1319	S1332	S1354	S1377	S1391	S1404	S1431	S1443	Empty
			Altretamine	Cetirizine DiHCl	Costunolide	Flumazenil (RO 15-1788)	Lansoprazole	Drospirenone	Oxcarbazepine	Trilostane	Sildenafil Citrate	Zileuton (A-64077)
	Plate layout: L8000-03
		1	2	3	4	5	6	7	8	9	10	11	12
	a	Empty	S1444	S1468	S1500	S1547	S1576	S1606	S1625	S1635	S1647	S1665	Empty
			Ziprasidone HCl	Alfacalcidol	Betamethasone	Febuxostat	Sulfasalazine (NSC 667219)	Clotrimazole	Ethinyl Estradiol	Erythromycin	Adenosine	Estrone
	b	Empty	S1445	S1483	S1501	S1548	S1578	S1607	S1626	S1638	S1649	S1666	Empty
			Zonisamide	Iloperidone	Mycophenolate mofetil (RS-61443)	Dapagliflozin (BMS-512148)	Candesartan (CV-11974)	Rizatriptan Benzoate	Naproxen Sodium	Ibuprofen (NSC 256857)	Zolmitriptan	Flucytosine
	c	Empty	S1453	S1485	S1504	S1549	S1591	S1608	S1627	S1639	S1651	S1667	Empty
			Tipifarnib (R115777)	HMN-214	Dyphylline	Nebivolol hydrochloride (R-65824)	Bestatin (NK421)	Pyridostigmine Bromide	Nitazoxanide (NSC 697855)	Amprenavir (VX-478)	Telbivudine	Trichlormethiazide
	d	Empty	S1457	S1488	S1505	S1550	S1593	S1613	S1628	S1640	S1652	Empty	Empty
			Atazanavir (BMS-232632) Sulfate	Naratriptan HCl	Aztreonam	Pimobendan	Apixaban (BMS 562247-01)	Silodosin	Triamcinolone Acetonide	Albendazole (SKF-62979)	Monobenzone
	e	Empty	S1458	S1490	S1512	S1565	S1601	S1614	S1629	S1641	S1653	S1679	Empty
			Neflamapimod (VX-745)	Ponatinib (AP24534)	Tadalafil (IC351)	Lumacaftor (VX-809)	Reserpine	Riluzole (PK 26124)	Orlistat (Ro 18-0647)	Chlorothiazide	Tretinoin (NSC 122758)	Flurbiprofen
	f	Empty	S1465	S1491	S1514	S1567	S1603	S1618	S1630	S1643	S1654	S1680	Empty
			Moxifloxacin (BAY12-8039) HCl	Fludarabine (NSC 118218)	Cyclosporine	Pomalidomide (CC-4047)	Furosemide (NSC 269420)	Sulfameter	Allopurinol	Ursodiol	Phenylbutazone	Disulfiram (NSC 190940)
	g	Empty	Empty	S1497	S1517	S1569	S1604	S1622	S1631	S1644	S1655	S1681	Empty
				Pralatrexate (NSC 754230)	Natamycin	Tazarotene	Olmesartan Medoxomil	Prednisone (NSC-10023)	Allopurinol Sodium	Nitrofural	Ezetimibe (SCH-58235)	Mesalamine (5-ASA)
	h	Empty	S1467	S1499	S1526	S1573	S1605	Empty	S1633	S1645	S1658	S1683	Empty
			Doxercalciferol	Cefaclor	Quizartinib (AC220)	Fasudil (HA-1077) HCl	Cefdinir		Zafirlukast (ICI-204219)	Ketoprofen	Dofetilide	Ipratropium Bromide
	Plate layout: L8000-04
		1	2	3	4	5	6	7	8	9	10	11	12
	a	Empty	S1685	S1702	S1718	S1734	S1754	S1770	S1784	S1801	S1828	S1845	Empty
			Sulfanilamide	Didanosine	Adefovir Dipivoxil (GS 0840)	Meloxicam	Oxybutynin	Sulfadiazine	Vidarabine	Ranitidine Hydrochloride	Proparacaine HCl	Cimetidine
	b	Empty	S1688	S1705	S1721	S1735	S1756	S1771	S1786	S1805	S1829	S1847	Empty
			Betamethasone Dipropionate	Progesterone (NSC 9704)	Azathioprine	Mesna	Enoxacin	Chlorprothixene	Verteporfin (CL 318952)	Acetylcholine Chloride	Pranlukast	Clemastine (HS-592) fumarate
	c	Empty	S1689	S1706	S1723	S1736	S1759	S1774	S1787	S1806	S1830	S1848	Empty
			Meprednisone	Lamivudine (BCH-189)	Indomethacin (NSC-77541)	Methocarbamol	Pitavastatin (NK-104) calcium	Thioguanine (NSC 752)	Teniposide	Acipimox	Oxfendazole	Curcumin
	d	Empty	S1690	S1709	S1727	S1738	S1760	S1775	S1790	S1808	S1831	S1849	Empty
			Betamethasone Valerate	Estradiol	Levonorgestrel	Telmisartan	Rifapentine	Thiotepa	Rifaximin	Nifedipine (BAY-a-1040)	Carvedilol	Daidzein
	e	Empty	S1692	S1712	S1729	S1739	S1761	S1776	S1792	S1811	S1833	S1854	Empty
			Busulfan (NSC-750)	Deferasirox (ICL-670)	Gemfibrozil	Thiabendazole	Suprofen	Toremifene Citrate (NK 622)	Simvastatin (MK 733)	Amiloride (MK-870) HCl	Butoconazole nitrate	Bifonazole
	f	Empty	S1693	S1713	S1730	S1741	S1763	S1777	S1793	S1816	S1835	S1855	Empty
			Carbamazepine	Piroxicam	Indapamide	Rifabutin (LM427)	Quetiapine (ICI-204636) fumarate	Ethionamide	Ramipril	Chlorpheniramine Maleate	Azithromycin (CP-62993)	Pefloxacin Mesylate
	g	Empty	S1696	S1714	S1732	S1742	S1764	S1778	S1794	S1820	S1839	S1856	Empty
			Hydrocortisone (NSC 10483)	Gemcitabine (LY-188011)	Mitotane	Nevirapine (NSC 641530)	Rifampin (NSC-113926)	Trifluridine (NSC 75520)	Fenofibrate (NSC-281319)	Clofibrate	Chloroxine	Metoprolol Tartrate
	h	Empty	S1701	S1715	S1733	S1747	S1768	S1782	S1799	S1827	S1840	S1858	Empty
			Desonide	Glipizide	Methylprednisolone (NSC-19987)	Nimodipine	Cefditoren Pivoxil	Azacitidine (5-Azacytidine)	Ranolazine	Betaxolol HCl	Lomustine	Dienestrol
	Plate layout: L8000-05
		1	2	3	4	5	6	7	8	9	10	11	12
	a	Empty	S1859	S1894	S1910	S1934	S1965	S1990	S2024	S2042	S2059	S2078	Empty
			Diethylstilbestrol	Valsartan (CGP-48933)	Tioconazole	Nystatin (Fungicidin)	Primidone	Capsaicin(Vanilloid)	Ketotifen Fumarate	Cyproterone Acetate	Terazosin HCl Dihydrate	Famotidine
	b	Empty	S1869	S1895	S1913	S1937	S1969	S1992	S2025	S2045	S2061	S2080	Empty
			Dapoxetine HCl	Dipyridamole (NSC 515776)	Tropicamide	Isoniazid	Nefiracetam	Fluticasone propionate	Urapidil HCl	Doxifluridine	Lovastatin (MK-803)	Clevidipine Butyrate
	c	Empty	S1878	S1896	S1914	S1941	S1971	S2003	S2028	S2046	S2064	S2082	Empty
			Ganciclovir (BW 759)	Hydroxyurea (NSC-32065)	Pregnenolone	Enalapril Maleate	Nicorandil	Maraviroc (UK-427857)	Diclazuril	Pioglitazone HCl	Balofloxacin	Adiphenine HCl
	d	Empty	S1880	S1899	S1915	S1949	S1972	S2006	S2029	S2051	S2065	S2086	Empty
			Roxatidine Acetate HCl	Nicotinamide (NSC 13128)	Sulfamethoxazole	Menadione (NSC 4170)	Tamoxifen (ICI 46474) Citrate	Pyrimethamine	Uridine	Captopril	Lafutidine	Ivabradine HCl
	e	Empty	S1883	S1903	S1916	S1950	S1973	S2007	S2032	S2053	S2067	S2087	Empty
			Idoxuridine	Diclofenac Sodium	Sulfisoxazole	Metformin HCl	Cyclocytidine HCl	Sulindac	Rebamipide	Cytidine	Ozagrel HCl	Rivastigmine Tartrate
	f	Empty	S1884	S1907	S1917	S1952	S1975	S2015	S2037	S2055	S2069	S2090	Empty
			Sparfloxacin	Metronidazole	Crystal Violet	Methoxsalen	Aripiprazole	Suplatast Tosylate	Candesartan Cilexetil	Gimeracil	Argatroban (MCI-9038)	Dexmedetomidine HCl
	g	Empty	S1888	S1908	S1920	S1957	S1978	S2017	S2038	S2057	S2072	S2096	Empty
			Deflazacort	Flutamide	Haloperidol	Sulfamethizole	Methscopolamine	Benidipine HCl	Phentolamine Mesylate	Cyclophosphamide (NSC-26271) Monohydrate	Seratrodast(AA-2414)	Almotriptan Malate
	h	Empty	S1890	S1909	S1933	S1959	S1979	S2020	S2040	S2058	S2077	S2098	Empty
			Nizatidine	Fluvastatin (XU-62-320) Sodium	Triamcinolone	Tolfenamic Acid	Amiodarone (NSC 85442) HCl	Formoterol Hemifumarate	Nimesulide	Tolnaftate	Atorvastatin Calcium	Bexarotene (LGD1069)
	Plate layout: L8000-06
		1	2	3	4	5	6	7	8	9	10	11	12
	a	Empty	S2099	S2113	S2130	S2180	S2246	S2264	S2280	S2296	S2310	S2328	Empty
			Temocapril HCl	Cisatracurium Besylate	Atropine sulfate monohydrate	Ixazomib (MLN2238)	Abiraterone Acetate (CB7630)	Artemether	Chlorogenic Acid	Enoxolone	Honokiol (NSC 293100)	Nalidixic acid
	b	Empty	S2101	S2114	S2131	S2181	S2250	S2265	S2283	S2299	S2311	S2329	Empty
			Gabexate Mesylate	Dronedarone HCl	Roflumilast (B9302-107)	Ixazomib Citrate (MLN9708) Analogue	(-)-Epigallocatechin Gallate	Artesunate (WR-256283)	Cinchonine(LA40221)	Formononetin	Hyodeoxycholic acid (HDCA)	Naringin
	c	Empty	S2102	S2118	S2151	S2199	S2256	S2266	S2284	S2300	S2314	S2331	Empty
			Rasagiline Mesylate	Ibutilide Fumarate	Sonidegib (NVP-LDE225)	Aliskiren Hemifumarate	4-Methylumbelliferone (4-MU)	Asiatic Acid	Colchicine (NSC 757)	Ferulic Acid	Kaempferol (NSC 407289)	Neohesperidin Dihydrochalcone (Nhdc)
	d	Empty	S2103	S2119	S2154	S2208	S2258	S2268	S2286	S2302	S2318	S2332	Empty
			Naltrexone HCl	Probucol	Dabigatran (BIBR-1048) etexilate	Formestane	Esculin	Baicalein	Cyclosporin A (NSC 290193)	Glycyrrhizin (NSC 167409)	Lappaconitine	Neohesperidin
	e	Empty	S2105	S2125	S2167	S2217	S2260	S2269	S2287	S2303	S2320	S2334	Empty
			Pantoprazole	Mestranol	Bazedoxifene (TSE-424) acetate	Irinotecan (CPT-11) HCl Trihydrate	Amygdalin	Baicalin (NSC-661431)	Cytisine	Gossypol Acetate	Luteolin	Oleanolic Acid
	f	Empty	S2108	S2126	S2169	S2226	S2261	S2270	S2289	S2304	S2321	S2336	Empty
			Flunixin Meglumin	Naftopidil	Rosuvastatin (ZD4522) calcium	Idelalisib	Andrographolide	Bergenin	Daidzin	Gramine	Magnolol	Orotic acid (6-Carboxyuracil)
	g	Empty	S2109	S2127	S2173	S2229	S2262	S2271	S2290	S2308	S2322	S2337	Empty
			Imidapril HCl	S-(+)-Rolipram	Telotristat Etiprate (LX 1606 Hippurate)	Eltrombopag (SB497115) Olamine	Apigenin (LY 080400)	Berberine chloride (NSC 646666)	Dihydroartemisinin (DHA)	Hesperetin	(+)-Matrine	Osthole
	h	Empty	S2111	S2128	S2177	S2233	S2263	S2277	S2295	S2309	S2325	S2338	Empty
			Lapatinib (GW-572016)	Bazedoxifene (WAY-140424) HCl	Dichlorphenamide	Esomeprazole sodium	Arbutin	Caffeic Acid	Emodin	Hesperidin	Morin Hydrate	Oxymatrine
	Plate layout: L8000-07
		1	2	3	4	5	6	7	8	9	10	11	12
	a	Empty	S2341	S2354	S2370	S2386	S2401	S2455	S2471	S2487	S2502	S2515	Empty
			(-)-Parthenolide	Sclareol	Ursolic Acid	Indirubin (NSC 105327)	Sodium Danshensu	Bethanechol chloride	Gallamine Triethiodide	Mycophenolic acid	Quinine HCl Dihydrate	Vardenafil HCl Trihydrate
	b	Empty	S2344	S2357	S2375	S2387	S2403	S2456	S2473	S2489	S2503	S2516	Empty
			Piperine	Silibinin (NSC 651520)	Aloin	Lappaconite HBr	Tetrandrine (NSC-77037)	Chlorpromazine HCl	Hexestrol	Nateglinide	Racecadotril	Xylazine HCl
	c	Empty	S2346	S2358	S2376	S2388	S2422	S2458	S2475	S2492	S2504	S2517	Empty
			Puerarin	Silymarin	Ammonium Glycyrrhizinate	L-carnitine	Ipriflavone (Osteofix)	Clonidine HCl	Imatinib (STI571)	Novobiocin Sodium (NSC 2382)	Ribavirin (ICN-1229)	Maprotiline HCl
	d	Empty	S2347	S2362	S2378	S2389	S2423	S2461	S2480	S2493	S2505	S2519	Empty
			Quercetin Dihydrate	Synephrine	Butylscopolamine Bromide	Naringin Dihydrochalcone	(S)-10-Hydroxycamptothecin	Domperidone	Loperamide HCl	Olanzapine	Rosiglitazone (BRL-49653) maleate	Naphazoline HCl
	e	Empty	S2348	S2364	S2379	S2390	S2438	S2466	S2481	S2494	S2508	S2528	Empty
			Rotenone (Barbasco)	Tanshinone I	Dioscin	Polydatin	Synephrine HCl	Estriol	Manidipine	Olopatadine HCl	Scopolamine (LSM-4015) HBr	Ciclopirox
	f	Empty	S2349	S2365	S2380	S2391	S2439	S2467	S2484	S2496	S2509	S2529	Empty
			Rutaecarpine	Tanshinone IIA	Diosmetin	Quercetin (NSC 9221)	Guanosine	Famciclovir	Milrinone	Ozagrel	Sotalol HCl	Dopamine HCl
	g	Empty	S2350	S2366	S2382	S2396	S2443	S2468	S2485	S2497	S2511	S2533	Empty
			Rutin	Taxifolin (Dihydroquercetin)	Evodiamine	Salidroside	Tolbutamide (HLS 831)	Fenbendazole	Mitoxantrone (NSC-301739) 2HCl	Pancuronium dibromide	Sulfadoxine	Ritodrine HCl
	h	Empty	S2351	S2369	S2383	S2397	S2450	S2470	S2486	S2499	S2512	S2535	Empty
			Salicin	Troxerutin	Gastrodin	Palmatine chloride	Equol	Fluocinolone Acetonide	Moroxydine HCl	Phenoxybenzamine HCl	Tenoxicam	Econazole nitrate
	Plate layout: L8000-08
		1	2	3	4	5	6	7	8	9	10	11	12
	a	Empty	S2536	S2553	S2567	S2585	S2606	S2665	S2789	S2840	S2900	S3012	Empty
			Miconazole	5-Aminolevulinic acid HCl	Medroxyprogesterone acetate (NSC-26386)	Brompheniramine hydrogen maleate	Mifepristone (RU486)	Ciprofibrate	Tofacitinib (CP-690550)	Apalutamide (ARN-509)	Cobicistat (GS-9350)	Pazopanib
	b	Empty	S2537	S2554	S2569	S2586	S2607	S2673	S2790	S2851	S2902	S3015	Empty
			Secnidazole	Daphnetin	Phenylephrine (NCI-C55641) HCl	Dimethyl Fumarate	Buflomedil HCl	Trametinib (GSK1120212)	Istradefylline	Baricitinib (INCB028050)	S-Ruxolitinib (INCB018424)	Amoxicillin
	c	Empty	S2541	S2555	S2570	S2590	S2610	S2680	S2792	S2853	S2907	S3017	Empty
			Clomipramine HCl	Clarithromycin	Prednisolone Acetate	Pioglitazone (AD-4833)	Lonidamine (AF-1890)	Ibrutinib (PCI-32765)	Torcetrapib	Carfilzomib (PR-171)	Pirfenidone (S-7701)	Aspirin (NSC 27223)
	d	Empty	Empty	S2556	S2576	S2593	S2611	S2727	S2797	S2868	S2922	S3018	Empty
				Rosiglitazone (BRL 49653)	Xylometazoline HCl	Tolvaptan	Ethisterone	Dacomitinib (PF-00299804)	Lonafarnib (SCH66336)	Alogliptin (SYR-322) benzoate	Icotinib (BPI-2009H)	Niflumic acid
	e	Empty	S2543	S2559	S2577	S2601	S2615	S2736	S2807	S2874	S3001	S3019	Empty
			Ceftiofur HCl	Cortisone acetate	Phenacetin	Gliclazide	Noradrenaline bitartrate monohydrate	Fedratinib (TG101348)	Dabrafenib (GSK2118436)	Camostat Mesilate	Clevudine	Ciclopirox ethanolamine
	f	Empty	S2549	S2561	S2579	S2602	S2625	S2741	S2809	S2875	S3002	S3021	Empty
			Trospium chloride	Clomifene citrate	Zidovudine	Acemetacin	Fostamatinib (R788)	Niraparib (MK-4827)	MPEP	Prucalopride	Rivaroxaban (BAY 59-7939)	Rimonabant (SR141716)
	g	Empty	Empty	S2564	S2581	S2603	Empty	S2760	S2814	S2883	S3005	S3022	Empty
				Cloxacillin Sodium	Quinapril HCl	Tioxolone		Canagliflozin (JNJ 28431754)	Alpelisib (BYL719)	4-Aminohippuric Acid	Paroxetine HCl	Cabazitaxel (XRP6258)
	h	Empty	S2552	S2566	S2584	Empty	S2664	S2762	Empty	S2884	S3008	S3023	Empty
			Azelastine HCl	Isoprenaline (NCI-C55630) HCl	Clobetasol propionate		Clinofibrate	Alectinib (CH5424802)		Acesulfame Potassium	Zaltoprofen	Bufexamac
	Plate layout: L8000-09
		1	2	3	4	5	6	7	8	9	10	11	12
	a	Empty	S3024	S3046	S3079	S3117	S3149	S3175	Empty	S3609	S3627	S3655	Empty
			Lamotrigine	Azilsartan	Atovaquone	Oxybutynin hydrochloride	Estradiol valerate	Atomoxetine HCl		Berbamine dihydrochloride	Tryptamine	Cefepime Dihydrochloride Monohydrate
	b	Empty	S3027	S3047	S3080	S3120	S3151	S3176	S3195	S3611	S3635	S3656	Empty
			Fenoprofen calcium hydrate	Otilonium Bromide	Etravirine (TMC125)	Doxepin HCl	Gliquidone	Betahistine 2HCl	Azlocillin sodium salt	(+)-Fangchinoline	Medroxyprogesterone	Piribedil
	c	Empty	S3030	S3052	S3081	S3124	S3160	S3178	S3200	S3612	S3639	S3657	Empty
			Niclosamide (BAY2353)	Rupatadine Fumarate	Ulipristal Acetate (CDB 2914)	Dexamethasone Acetate	Ethynodiol diacetate	Brinzolamide	Triflusal	Rosmarinic acid	Tacrine hydrochloride hydrate	Promestriene
	d	Empty	S3035	S3054	S3083	S3129	S3162	S3180	S3201	S3615	S3641	S3659	Empty
			Daunorubicin (RP 13057) HCl	Alverine Citrate	Indacaterol Maleate	Trimethoprim	Tylosin tartrate	Eletriptan HBr	Trifluoperazine 2HCl	Dehydrocostus Lactone	Osalmid	Fludrocortisone acetate
	e	Empty	S3036	S3057	S3100	S3132	S3167	S3181	S3202	S3616	S3643	S3666	Empty
			Pravastatin sodium	Azilsartan Medoxomil	2-Thiouracil	Sulfamerazine	Altrenogest	Flumequine	Catharanthine	Asiaticoside	Amitraz	Ilaprazole
	f	Empty	S3037	S3067	S3104	S3137	S3170	S3183	S3212	S3621	S3647	S3668	Empty
			Bepotastine Besilate	Chlorhexidine 2HCl	Moguisteine	Sodium salicylate	Ampicillin sodium	Amitriptyline HCl	Moclobemide (Ro 111163)	Pazufloxacin mesylate	Mafenide Acetate	Thymopentin
	g	Empty	S3038	Empty	S3105	S3138	S3172	S3185	S3604	S3622	S3648	S3669	Empty
			Fosaprepitant dimeglumine salt		Nadifloxacin	Methylthiouracil	Anagrelide HCl	Adrenalone HCl	Triptolide (PG490)	Diammonium Glycyrrhizinate	Amlexanox (AA-673)	Carmustine
	h	Empty	S3043	S3078	S3116	S3144	S3173	S3186	S3606	S3625	S3654	S3671	Empty
			Rofecoxib	Beclomethasone dipropionate	Sulfathiazole	Darifenacin HBr	Antipyrine	Azatadine dimaleate	Fangchinoline	Tyramine	Tauroursodeoxycholic Acid (TUDCA)	Quinestrol
	Plate layout: L8000-10
		1	2	3	4	5	6	7	8	9	10	11	12
	a	Empty	S3672	S3690	S3714	S3745	S3774	S3807	S3847	S3883	S3899	S3926	Empty
			Cefonicid sodium	Pargyline hydrochloride	Lifitegrast	Balsalazide disodium	Dehydroandrographolide Succinate Potasium Salt	Dehydroandrographolide	Panaxatriol	Protopine	Hederagenin	Forsythin
	b	Empty	S3675	S3692	Empty	S3751	S3776	S3809	S3849	S3885	S3901	S3927	Empty
			Umbelliferone	N-Ethylmaleimide (NEM)		Quinidine hemisulfate hydrate	Sophoricoside	Imperatorin	D-Galactose	Pyrogallol	Astragaloside IV	Swertiamarin
	c	Empty	S3676	S3694	Empty	S3755	S3779	S3810	S3850	S3887	S3909	S3930	Empty
			Carbendazim	Glucosamine hydrochloride		Betaine	cis-Anethole	Scutellarin	Glucosamine sulfate	α-L-Rhamnose monohydrate	Catalpol	Liquiritin
	d	Empty	S3677	S3697	S3724	S3758	S3785	S3811	S3851	S3889	S3914	S3935	Empty
			Cinnamic acid	Mafenide hydrochloride	Velpatasvir	Sinomenine hydrochloride	Notoginsenoside R1	Ginsenoside Re	Camphor	Arteether	α-Hederin	Nonivamide
	e	Empty	S3681	S3698	S3731	S3759	S3788	S3817	S3856	S3892	S3921	S3944	Empty
			Vitamin E Acetate	Nortriptyline hydrochloride	Tipiracil hydrochloride	Norcantharidin	Carvacrol	Harmine hydrochloride	Allantoin	Isopsoralen	Lathyrol	Valproic acid (VPA)
	f	Empty	S3684	S3701	S3732	S3763	S3794	S3835	S3868	S3893	S3923	S3945	Empty
			Methacholine chloride	Benactyzine hydrochloride	Avibactam sodium	Cinnamaldehyde	Palmitic acid	Loganin	Harmine	Bornyl acetate	Ginsenoside Rg1	L-Cycloserine
	g	Empty	Empty	S3707	S3739	S3766	S3802	S3842	S3870	S3895	S3924	S3951	Empty
				Ethopabate	Calcipotriene	Tanshinone IIA sulfonate sodium	Trigonelline Hydrochloride	Isoquercitrin	D-Pinitol	Sophoridine	Ginsenoside Rb1	Tannic acid
	h	Empty	S3687	S3711	S3742	S3769	S3805	S3846	S3876	S3898	S3925	S3956	Empty
			Urea	Carbasalate Calcium	Cholic acid	Palmatine	Stevioside	Eupatilin	Indigo	Hydroxy Camptothecine	(-)-Epicatechin gallate	Tetramethylpyrazine
	Plate layout: L8000-11
		1	2	3	4	5	6	7	8	9	10	11	12
	a	Empty	S3957	S3975	S4001	S4014	S4026	S4045	Empty	S4078	S4089	S4110	Empty
			Gamma-Oryzanol	Protocatechuic acid	Cabozantinib malate	Hyoscyamine	Hydroxyzine 2HCl	Pheniramine Maleate		Mefenamic Acid	Halobetasol Propionate	Estradiol Benzoate
	b	Empty	S3959	S3980	S4003	S4017	S4034	S4046	S4065	S4079	S4090	S4113	Empty
			(+)-Borneol	Pyridoxine	Lithocholic acid	Allylthiourea	Diphemanil Methylsulfate	Estradiol Cypionate	Guanabenz Acetate	Ticagrelor	Fenspiride HCl	Desvenlafaxine
	c	Empty	S3966	S3982	S4004	S4018	Empty	S4047	S4070	S4080	S4095	S4114	Empty
			Nifuratel	Batyl alcohol	Ethambutol 2HCl	Sennoside B		Bisacodyl	Guanidine HCl	Triamterene	Difluprednate	Triclabendazole
	d	Empty	S3967	S3983	S4007	S4019	S4037	S4049	S4071	S4081	S4098	S4118	Empty
			Flavone	Caryophyllene oxide	Pentamidine isethionate	Avanafil	Doxapram HCl	Valdecoxib	Griseofulvin	Sulfacetamide Sodium	Halcinonide	Histamine 2HCl
	e	Empty	S3968	S3984	S4009	S4022	S4039	S4051	S4072	S4082	S4101	S4119	Empty
			Histamine	Nordihydroguaiaretic acid (NDGA)	Mirabegron	Probenecid	Methazolamide	Nabumetone	Decamethonium Bromide	Spiramycin	Voglibose	Pefloxacin Mesylate Dihydrate
	f	Empty	S3970	S3987	S4010	S4023	S4040	S4053	S4073	S4083	S4102	S4120	Empty
			Vindoline	L-Tryptophan	Acebutolol HCl	Procaine HCl	Norethindrone	Sertraline HCl	Sodium 4-Aminosalicylate	Vitamin A Acetate	Eprosartan Mesylate	Sulconazole Nitrate
	g	Empty	Empty	S3996	S4011	S4024	S4041	S4054	S4075	S4086	S4104	S4123	Empty
				Thioctic acid	Ampiroxicam	Homatropine Methylbromide	Olsalazine Sodium	Spironolactone	Zinc Pyrithione	Loxapine Succinate	Diminazene Aceturate	Timolol Maleate
	h	Empty	S3974	S3998	S4012	S4025	S4042	S4059	S4076	S4088	S4107	S4124	Empty
			(+)-Catechin hydrate	(+)-α-Lipoic acid	Desloratadine	Homatropine Bromide	Nafcillin Sodium	Sodium Nitroprusside Dihydrate	Propranolol HCl	Flumethasone	Clofazimine	Tolazoline HCl
	Plate layout: L8000-12
		1	2	3	4	5	6	7	8	9	10	11	12
	a	Empty	S4125	S4155	S4169	S4184	S4196	S4213	S4227	S4243	S4255	S4267	Empty
			Sodium Phenylbutyrate	Chlorzoxazone	Teriflunomide	Penciclovir	Ethacridine lactate monohydrate	Dirithromycin	Fidaxomicin	Deoxycorticosterone acetate	Quinacrine 2HCl	Diacerein
	b	Empty	S4131	S4159	S4170	S4185	S4197	S4214	S4230	S4244	S4256	S4268	Empty
			Levodropropizine	Bezafibrate	Coumarin	Tiratricol	Bemegride	Sucralose	Oxaprozin	Serotonin HCl	Buspirone HCl	Flufenamic acid
	c	Empty	S4135	S4160	S4171	S4186	S4201	S4216	S4231	S4246	S4257	S4269	Empty
			Clorprenaline HCl	Penicillin G Sodium	Choline Chloride	Domiphen Bromide	Florfenicol	Valnemulin HCl	Pilocarpine HCl	Tranylcypromine (2-PCPA) HCl	Alizapride HCl	Vinorelbine ditartrate (KW-2307)
	d	Empty	S4136	S4162	S4172	S4187	S4206	S4217	S4237	S4247	S4259	S4270	Empty
			Carprofen	Benzethonium Chloride	Cetylpyridinium Chloride	Salicylanilide	Cysteamine HCl	Liothyronine Sodium	Primaquine Diphosphate	Prucalopride Succinate	Vilazodone HCl	Oxiracetam
	e	Empty	S4147	S4164	S4175	S4188	S4207	S4221	S4238	S4249	S4260	S4277	Empty
			Azithromycin Dihydrate	Doxofylline	Sulfaguanidine	Sasapyrine	Clofibric Acid	Benzbromarone	Cepharanthine	Flopropione	Tamibarotene	Bambuterol HCl
	f	Empty	S4149	S4165	S4177	S4190	S4208	S4223	S4239	S4250	S4263	S4278	Empty
			Amfenac Sodium Monohydrate	Benzydamine HCl	Uracil	Cinchophen	Chromocarb	Mevastatin	Bergapten	Sulfamethoxypyridazine	Efaproxiral Sodium	Carteolol HCl
	g	Empty	S4151	S4166	S4181	S4192	S4210	S4224	S4240	Empty	S4265	S4280	Empty
			Penfluridol	Chlorpropamide	Nicardipine HCl	Chlorquinaldol	Benzocaine	Erythritol	Doxylamine Succinate		Nicaraven	Meclofenoxate (Centrophenoxine) HCl
	h	Empty	S4152	S4167	S4182	S4195	Empty	S4225	S4242	S4253	S4266	S4282	Empty
			Ethamsylate	Cyromazine	Nifuroxazide	Broxyquinoline		Mexiletine HCl	Cetrimonium Bromide (CTAB)	Epinastine HCl	Brimonidine Tartrate	Nelfinavir (AG 1343) Mesylate
	Plate layout: L8000-13
		1	2	3	4	5	6	7	8	9	10	11	12
	a	Empty	S4283	S4297	S4330	S4353	S4381	S4502	S4516	S4535	S4550	S4578	Empty
			Cyclobenzaprine HCl	Mupirocin	Isoetharine Mesylate	Terfenadine	Proadifen HCl	Eltrombopag	(+)-Camphor	Methylene Blue	Azelaic acid	Tyloxapol
	b	Empty	S4285	S4299	S4334	S4354	S4382	S4504	S4517	S4538	S4552	S4583	Empty
			Ospemifene	Dicoumarol	Mesoridazine Besylate	Thiostrepton	Pyrilamine Maleate	6-Mercaptopurine (6-MP) Monohydrate	Cefotaxime sodium	Pantoprazole sodium	Bithionol	Butamben
	c	Empty	S4288	S4303	S4335	S4358	S4387	S4505	S4521	S4539	S4561	S4585	Empty
			Chloroambucil	9-Aminoacridine	Metaproterenol Sulfate	Pimozide	Bendroflumethiazide	Vinblastine (NSC-49842) sulfate	DEET	Salicylic acid	Danthron	Succinylsulfathiazole
	d	Empty	S4289	S4307	S4336	S4361	S4394	S4506	S4524	S4541	S4564	S4587	Empty
			Metoclopramide HCl	Auranofin	Metaraminol Bitartrate	Cinoxacin	Clofoctol	Acetazolamide	2-Ethoxybenzamide	Triclosan	Diethylcarbamazine citrate	Pentylenetetrazol
	e	Empty	S4291	S4308	S4338	S4362	S4396	S4507	S4526	S4544	S4569	S4589	Empty
			Labetalol HCl	Benzthiazide	Methoxamine HCl	Glafenine HCl	Digoxigenin	17-Hydroxyprogesterone	Fenbufen	Urethane	Fluphenazine dihydrochloride	Amodiaquine dihydrochloride dihydrate
	f	Empty	S4292	S4309	S4339	S4367	S4404	S4509	S4527	S4546	S4570	S4591	Empty
			Diphenidol HCl	Bromocriptine Mesylate	Meticrane	Suxibuzone	Pasiniazid	4-Aminoantipyrine	Fenofibric acid	Xylitol	Halothane	Nitroxoline
	g	Empty	S4294	S4316	S4344	S4373	S4406	S4512	S4528	S4547	S4571	S4593	Empty
			Procainamide HCl	Clopamide	Oxprenolol HCl	Dicyclomine HCl	Pindolol	Aceglutamide	Furazolidone	8-Hydroxyquinoline	Hexylresorcinol	Chlormadinone acetate
	h	Empty	S4295	S4317	S4345	S4375	S4416	S4514	S4534	S4548	S4576	S4594	Empty
			Meclofenamate Sodium	Clorgyline HCl	Pentoxifylline	Mepenzolate Bromide	Trimipramine Maleate	Acetylleucine	6-Acetamidohexanoic acid	Aminoguanidine hydrochloride	Sulfabenzamide	Cephalothin sodium
	Plate layout: L8000-14
		1	2	3	4	5	6	7	8	9	10	11	12
	a	Empty	S4595	S4609	S4635	S4658	S4673	S4693	S4711	S4731	S4751	S4779	Empty
			Cefazolin Sodium	Diflunisal	Cyproheptadine hydrochloride sesquihydrate	Hydroquinidine	Etonogestrel	Guanfacine Hydrochloride	Esculetin	Perphenazine	Cisapride hydrate	Menadiol Diacetate
	b	Empty	S4596	S4610	Empty	S4660	S4679	S4695	S4714	S4735	S4753	S4783	Empty
			Cefixime	Mebendazole		Glycopyrrolate	Terazosin HCl	D panthenol	(-)-Menthol	Salvianolic acid B	Ganoderic acid A	Benzyl isothiocyanate
	c	Empty	S4599	S4619	S4641	S4662	Empty	S4696	S4717	S4736	S4754	Empty	Empty
			Benzyl benzoate	Itopride hydrochloride	Tedizolid Phosphate	Atazanavir		CarbinoxaMine Maleate	Isatin	Trapidil	Betulin
	d	Empty	S4600	S4625	S4646	S4665	S4682	S4697	S4718	S4737	Empty	Empty	Empty
			Benzyl alcohol	Alcaftadine	Ciclesonide	Rabeprazole sodium	Loxoprofen	Saxagliptin hydrate	Acetylcholine iodide	Psoralen
	e	Empty	S4601	S4628	S4647	S4666	S4685	S4701	S4722	S4744	S4759	S4797	Empty
			Clioquinol	(+/-)-Sulfinpyrazone	Cefmenoxime hydrochloride	Sivelestat sodium tetrahydrate	Efavirenz	2-Deoxy-D-glucose (2-DG)	(+)-Catechin	Anethole trithione	p-Coumaric Acid	Nicergoline
	f	Empty	S4602	S4629	S4650	S4667	S4686	S4706	S4723	S4748	S4769	Empty	Empty
			Acetohydroxamic acid	Chlorotrianisene	Atipamezole	Lidocaine hydrochloride	Vitamin E	Eugenol	(-)Epicatechin	Ondansetron Hydrochloride Dihydrate	L-5-Hydroxytryptophan
	g	Empty	S4603	S4630	S4651	S4669	S4687	S4707	S4725	S4749	S4772	S4817	Empty
			Gallic acid	Diazoxide	Etoricoxib	Benzocaine hydrochloride	Rivastigmine	Oleic Acid	Benzenesulfonamide	Citalopram HBr	alpha-Asarone	Atenolol
	h	Empty	S4604	S4633	S4656	S4672	S4690	S4709	S4727	S4750	Empty	S4832	Empty
			Levofloxacin hydrate	Isosorbide Mononitrate	Parecoxib	Dimenhydrinate	Escin	Latanoprost	Cinnarizine	Sulfacetamide sodium salt hydrate		Tolmetin
	Plate layout: L8000-15
		1	2	3	4	5	6	7	8	9	10	11	12
	a	Empty	S4833	S4856	S4940	S4977	S5009	S5032	S5062	S5091	S5163	S5234	Empty
			Cefoxitin sodium	Iproniazid	Maltol	Efonidipine	Brivudine	Mephenesin	Daclatasvir Dihydrochloride	Geranyl acetate	7-Methoxycoumarin	Nintedanib Ethanesulfonate Salt
	b	Empty	S4834	S4862	S4941	S4980	S5012	S5033	S5067	S5113	S5177	S5240	Empty
			Propantheline bromide	Squalene	Farnesol	Anamorelin	Octenidine Dihydrochloride	Terconazole	Losartan	Propyl gallate	Naproxen	Lenvatinib (E7080) Mesylate
	c	Empty	S4835	S4867	S4952	S4988	S5014	S5040	S5069	S5070	S5200	S5241	Empty
			Aceclofenac	Propacetamol hydrochloride	Fumaric acid	Tiamulin fumarate	Crisaborole (AN2728)	Tiamulin	Dabrafenib Mesylate	Pimasertib	Diaveridine	Lapatinib ditosylate monohydrate
	d	Empty	S4836	S4878	S4953	S5001	S5016	S5049	S5074	S5130	S5205	S5243	Empty
			Nilutamide	Neticonazole Hydrochloride	Usnic acid	Tofacitinib (CP-690550) Citrate	Isoprinosine	Thiocolchicoside	Argatroban Monohydrate	Taurocholic acid sodium salt hydrate	Nilotinib hydrochloride	Ruxolitinib Phosphate
	e	Empty	S4837	S4885	S4957	S5002	S5020	S5052	S5077	S5138	S5209	S5247	Empty
			Ibudilast	Taurolidine	Linalool	Fingolimod (FTY720) HCl	Tilorone dihydrochloride	Granisetron	Regorafenib (BAY-734506) Monohydrate	Citral	Enoxacin Sesquihydrate	Selamectin
	f	Empty	S4838	Empty	S4958	S5003	S5023	S5058	S5078	S5141	S5210	S5253	Empty
			Acotiamide hydrochloride		Glycocholic acid	Tacrolimus (FK506)	Nadolol	Revaprazan Hydrochloride	Osimertinib mesylate	Pyrithioxin	Sulfamethazine Sodium Salt	Cisapride (R 51619)
	g	Empty	S4849	S4896	S4975	S5006	S5027	S5059	S5082	S5145	S5211	S5254	Empty
			Levocetirizine Dihydrochloride	Elagolix Sodium	Fimasartan	Teprenone	Mebeverine Hydrochloride	Pixantrone Maleate	Vitamin K2	Protoporphyrin IX	4-Aminosalicylic acid	Dasatinib hydrochloride
	h	Empty	S4852	S4932	S4976	S5007	S5029	S5060	S5083	S5159	S5233	S5256	Empty
			Gadopentetate Dimeglumine	Proxyphylline	Sulfalene (SMPZ)	Delamanid	Etofylline	Metadoxine	Lentinan	Doxycycline	Fenretinide (NSC 374551)	Benproperine phosphate
	Plate layout: L8000-16
		1	2	3	4	5	6	7	8	9	10	11	12
	a	Empty	S5273	S5297	S5353	S5392	S5424	S5458	S5486	S5498	S5537	S5563	Empty
			Canrenone	Vidarabine monohydrate	Cefpiramide sodium	Mepivacaine	Carbaryl	Verbascoside	Fluorometholone	Betahistine mesylate	Tizanidine	Thioridazine hydrochloride
	b	Empty	S5278	S5298	S5358	S5398	S5428	S5459	S5487	S5502	S5538	S5564	Empty
			Tedizolid (TR-700)	Amoxicillin trihydrate	Regadenoson	Nefazodone hydrochloride	Promazine hydrochloride	Aucubin	Cefoperazone sodium	Ilaprazole sodium	Tropisetron	Xylazine
	c	Empty	S5279	S5301	S5365	S5399	S5435	S5466	S5488	S5504	S5544	S5566	Empty
			Fendiline hydrochloride	Carglumic Acid	Alogliptin	Chlorprothixene hydrochloride	Quinacrine Dihydrochloride Dihydrate	Saikosaponin A	Fluorescein	Ropivacaine	D-Ribose	Dapagliflozin propanediol monohydrate
	d	Empty	S5281	Empty	S5366	S5401	S5447	S5476	S5490	Empty	S5550	S5573	Empty
			Dapiprazole Hydrochloride		Fipronil	Tegaserod Maleate	Triprolidine Hydrochloride	Rolapitant	Disopyramide		Ethyl gallate	Tilmicosin phosphate
	e	Empty	S5284	S5325	S5369	S5407	S5452	S5479	S5491	S5507	S5552	S5582	Empty
			Adenosine 5'-monophosphate monohydrate	Nitisinone	Ethoxyquin	Squalane	Sanguinarine chloride	Cloperastine hydrochloride	Lomefloxacin	Trimebutine maleate	Amenamevir	Cytarabine hydrochloride
	f	Empty	S5286	S5327	S5371	S5416	S5453	S5480	S5492	S5508	S5554	S5592	Empty
			Ramatroban	Meisoindigo	Ajmaline	Metyrapone	Hyperoside	Clidinium Bromide	Econazole	MLN 0128	Lanatoside C	Vitamin A
	g	Empty	S5288	S5341	S5372	S5418	S5454	S5481	S5493	S5527	S5556	S5623	Empty
			Estropipate	Metroprolol succinate	Methyl Aminolevulinate Hydrochloride	Parecoxib Sodium	Saikosaponin D	Molindone hydrochloride	Atropine sulfate	Salmeterol	(-)-Sparteine Sulfate	Bedaquiline
	h	Empty	S5293	S5345	S5377	S5419	S5457	S5485	S5494	S5535	S5561	S5625	Empty
			Nimustine Hydrochloride	Nerolidol	Dibutyl phthalate	1,4-Cineole	Curculigoside	Desipramine Hydrochloride	Salbutamol	Moxifloxacin	Ethacrynic Acid	Ammonium lactate
	Plate layout: L8000-17
		1	2	3	4	5	6	7	8	9	10	11	12
	a	Empty	S5627	S5662	S5683	S5715	S5737	S5781	S5863	S5950	S6136	S6411	Empty
			Amsacrine hydrochloride	Ranitidine	Isoproterenol sulfate dihydrate	Atorvastatin	Diclofenac Epolamine	Raloxifene	Metronidazole Benzoate	Fingolimod	(±)-α-Bisabolol	Nimorazole
	b	Empty	S5649	S5663	S5698	S5716	S5740	S5787	S5868	S6003	S6288	S6441	Empty
			Hydroxyzine pamoate	Minaprine dihydrochloride	Ketorolac tromethamine salt	Abemaciclib (LY2835219)	Palonosetron	Dronedarone	DL-Menthol	Ataluren (PTC124)	Chlorhexidine diacetate	Riboflavin Tetrabutyrate
	c	Empty	S5651	S5664	S5703	S5717	S5749	S5795	S5871	S6055	S6400	S6453	Empty
			Dexrazoxane	Orphenadrine Hydrochloride	Carvedilol Phosphate	Acetohexamide	Chlorpromazine	Rasagiline	Trans-Tranilast	(S)-(−)-Limonene	Glucosamine	Bicyclol
	d	Empty	S5654	S5665	S5705	S5727	S5754	S5802	S5872	S6058	S6402	S6455	Empty
			Indacaterol	Drofenine Hydrochloride	Raceanisodamine	Tetryzoline	Baricitinib phosphate	Alprenolol hydrochloride	Estradiol dipropionate	β-Caryophyllene	2-Aminoethanethiol	Clebopride malate
	e	Empty	S5656	S5666	S5709	S5728	S5761	S5808	S5873	S6068	S6404	S6456	Empty
			Diphenylpyraline hydrochloride	Moxisylyte hydrochloride	Norgestrel	Delapril Hydrochloride	Citric acid	Relugolix	Scopolamine HBr trihydrate	Doxycycline monohydrate	Salicylamide	Glycyrrhetinic acid
	f	Empty	S5657	S5667	S5710	S5729	S5763	S5812	S5901	S6073	S6407	S6457	Empty
			Ertapenem sodium	Fruquintinib (HMPL-013)	Ambroxol	Fosfosal	D-Mannose	Choline Fenofibrate	Canagliflozin hemihydrate	Diclofenac acid	Tulobuterol hydrochloride	Flurbiprofen Axetil
	g	Empty	S5658	S5669	S5713	S5733	S5767	S5816	S5927	S6115	S6409	S6459	Empty
			Omeprazole Sodium	Isoxsuprine hydrochloride	Pravastatin	Stearic acid	Aliskiren	Pyrvinium	Proguanil	Pyridoxal 5′-phosphate hydrate	Zucapsaicin	Nifurtimox
	h	Empty	S5659	S5670	S5714	S5735	S5780	S5821	S5939	S6118	S6410	S6476	Empty
			Emedastine	Chloropyramine hydrochloride	lurasidone	Midodrine	Prazosin	Linoleic acid	Bendamustine (SDX105)	Terpinen-4-ol	Clemizole	Eicosapentaenoic Acid
	Plate layout: L8000-18
		1	2	3	4	5	6	7	8	9	10	11	12
	a	Empty	S6484	S7059	S7252	S7470	S7660	S7783	S7856	S7975	S8067	S8183	Empty
			uridine triacetate	Tezacaftor (VX-661)	Selinexor (KPT-330)	Triapine	Obeticholic Acid	Combretastatin A4	Tenofovir Alafenamide (GS-7340)	Favipiravir (T-705)	Vorapaxar (MK-5348)	Pimavanserin tartrate
	b	Empty	S6588	S7077	S7280	S7505	S7663	S7784	S7858	S7998	S8101	S8205	Empty
			Methylprednisolone hemisuccinate	Cilengitide trifluoroacetate	Edoxaban tosylate Monohydrate	(S)-crizotinib	Ruboxistaurin (LY333531) HCl	Fumagillin	Dibutyryl-cAMP (Bucladesine)	Entrectinib (RXDX-101)	CB-5083	Enasidenib (AG-221)
	c	Empty	S6590	S7083	S7297	S7536	S7668	S7786	S7867	S8016	S8116	S8206	Empty
			Hydrocortisone butyrate	Ceritinib (LDK378)	Osimertinib (AZD9291)	Lorlatinib (PF-6463922)	Picropodophyllin (PPP)	Erlotinib (OSI-774)	Oleuropein	Vonoprazan Fumarate (TAK-438)	Acalabrutinib (ACP-196)	Ivosidenib (AG-120)
	d	Empty	S6601	S7091	S7303	S7559	S7678	S7787	S7935	S8018	S8133	S8294	Empty
			(±)-Equol	Zotarolimus (ABT-578)	Rilpivirine	Darolutamide (ODM-201)	Sacubitril/valsartan (LCZ696)	Docetaxel Trihydrate	Y-39983 HCl	AZD7762	Resiquimod (R-848)	Olmutinib (BI 1482694)
	e	Empty	S6614	S7156	S7397	S7579	S7721	S7810	S7952	S8034	S8134	S8362	Empty
			Fursultiamine	Marimastat (BB-2516)	Sorafenib (BAY 43-9006)	Ledipasvir (GS5885)	Monomethyl auristatin E (MMAE)	Afatinib (BIBW2992) Dimaleate	Ozanimod (RPC1063)	Apremilast (CC-10004)	Radotinib	Tucatinib
	f	Empty	S7007	S7158	S7417	S7625	S7754	S7818	S7953	S8041	S8135	S8401	Empty
			Binimetinib (MEK162)	Abemaciclib mesylate (LY2835219)	Puromycin (CL13900) 2HCl	Niraparib (MK-4827) tosylate	Gilteritinib (ASP2215)	Pexidartinib (PLX3397)	ETC-1002	Cobimetinib (GDC-0973)	Riociguat (BAY 63-2521)	Erdafitinib (JNJ-42756493)
	g	Empty	S7025	S7160	S7440	S7633	S7781	S7834	S7954	S8048	S8136	S8432	Empty
			Embelin	Glasdegib (PF-04449913)	Ribociclib (LEE011)	Lomitapide Mesylate	Sunitinib (SU11248)	Cyclo (-RGDfK)	CP21R7 (CP21)	Venetoclax (ABT-199)	Sivelestat (ONO-5046)	Troglitazone (CS-045)
	h	Empty	S7028	S7179	S7456	S7650	S7782	S7844	S7960	S8051	S8144	S8539	Empty
			Duvelisib (IPI-145)	Siponimod (BAF312)	Osilodrostat (LCI699)	Peficitinib (ASP015K)	Dasatinib Monohydrate	Cyclo(RGDyK)	Larotrectinib (LOXO-101) sulfate	Macitentan (ACT 064992)	Halofuginone	TAS-102
	Plate layout: L8000-19
		1	2	3	4	5	6	7	8	9	10	11	12
	a	Empty	S8558	S9002	S9143	S9368	S9510	S8781	S9123	S9294	S6848	S3141	Empty
			Tofogliflozin(CSG 452)	L-Fucose	Ammonium Glycyrrhizate	ADP	Protriptyline hydrochloride	Selpercatinib (LOXO-292)	Eriodictyol	Gelsemine	3'-Fluoro-3'-deoxythymidine (Alovudine)	Maleimide
	b	Empty	S8567	S9007	S9179	S9382	S4421	S9015	S9183	S9416	S0088	S5248	Empty
			Tucidinostat (Chidamide)	2'-Deoxyguanosine monohydrate	Catharanthine hemitartrate	Thymine	Josamycin	Homoharringtonine (CGX-635)	Ruscogenin	Triptonide	Pemigatinib (INCB054828)	Apatinib
	c	Empty	S8594	S9032	S9193	S9413	S6589	S9024	S9192	S9519	S2440	S6948	Empty
			Tirofiban Hydrochloride	Sanguinarine	Aristolochic acid A	Yangonin	Norethisterone Enanthate	3-O-Acetyl-11-keto-β-boswellic acid (AKBA)	Vitexin	Fadrozole (CGS16949A)	Vindesine sulfate	Lanreotide
	d	Empty	S8615	S9042	S9240	S9459	S6593	S9050	S9224	S2307	S3273	S6958	Empty
			Sodium dichloroacetate (DCA)	Wedelolactone	Isofraxidin	Mecamylamine Hydrochloride	Methylprednisolone sodium succinate	Boldine	Dehydroandrographolide Succinate	Roquinimex	Hypericin	Treosulfan
	e	Empty	S8726	S9046	S9249	S9463	S6626	S9086	S9248	S2426	S6852	S9521	Empty
			Anlotinib (AL3818) dihydrochloride	Berberine	Securinine	Demecarium Bromide	Brequinar (DUP785)	Dihydrocapsaicin	Homoorientin	Tirapazamine	Gossypol	Pentostatin
	f	Empty	S8757	S9063	S9321	S9502	S6631	S9102	S9270	S6676	S0323	S9712	Empty
			Ripretinib (DCC-2618)	Harringtonine	Topotecan	Madecassic acid	Belotecan (CKD-602) hydrochloride	Magnolin	Dracohodin perochlorate	Ebselen	Antineoplaston A10	Fluzoparib (SHR-3162)
	g	Empty	S8791	S9140	S9338	Empty	S6742	S9110	S9285	S2288	S1198	S4418	Empty
			Zanubrutinib (BGB-3111)	Pulegone	Octyl gallate		Etofenamate	Morin	Fargesin	Rubitecan	Irinotecan (CPT-11)	Phenol Red sodium salt
	h	Empty	S8817	S9141	S9354	S9507		S9111	S9288	S2447	S1421	S4432	Empty
			Almonertinib (HS-10296)	Berbamine	Oxalic acid	(−)-Norepinephrine	Gandotinib	Isorhamnetin	Casticin	Ansamitocin p-3 (Maytansinol isobutyrate, NSC292222)	Staurosporine (AM-2282)	Ixazomib Citrate (MLN9708)
	Plate layout: L8000-20
		1	2	3	4	5	6	7	8	9	10	11	12
	a	Empty	S4447	S5026	Empty	E0190	E0704	S7048	S3020	S8942	P1005	E2944	Empty
			Pipobroman	Irinotecan hydrochloride		Invert sugar	Esaxerenone (CS-3150)	Talazoparib (BMN 673)	Romidepsin	Suramin sodium salt	Abarelix Acetate	Norepinephrine hydrochloride
	b	Empty	S4484	S5080	S5860	E0245	E0707	S7108	S6594	S8955	P1109	E4010	Empty
			Trametinib DMSO solvate	Neticonazole	Larotrectinib	Rhamnose	Nomegestrol Acetate	Encorafenib (LGX818)	Liarozole dihydrochloride	Sotorasib (AMG510) racemate	Linaclotide	L-3,4-Dihydroxyphenylalanine methyl ester hydrochloride
	c	Empty	S4489	S5184	S5958	E0515	E0814	S8162	S6984	S8999	E0359	S9865	Empty
			Tetraethylammonium chloride	Dexamethasone palmitate	Metformin	Cefatrizine	Masitinib mesylate	Upadacitinib (ABT-494)	Dianhydrogalactitol (VAL-083)	Exatecan Mesylate	Evocalcet	CB-5339
	d	Empty	S4895	S5187	S5971	E0527	Empty	S8553	S7930	S9522	E1310	E4467	Empty
			Nilotinib hydrochloride monohydrate	Ribociclib hydrochloride	Pemetrexed	Norgestimate		Avapritinib (BLU-285)	Ixabepilone (BMS-247550)	Valrubicin	DPCPX	Temozolomide Acid
	e	Empty	S4929	S5188	S8932	E0528	E2516	Empty	S8064	S9702	E1410	E4474	Empty
			Enasidenib Mesylate	Ribociclib succinate	Remdesivir (GS-5734)	Flecainide	Doxorubicin		Midostaurin (PKC412)	Finerenone	Fluspirilene	Infigratinib Phosphate
	f	Empty	S4947	S5190	S9783	E0530	P1110	S1217	S8716	S9726	E2873	E1445	Empty
			Regorafenib Hydrochloride	Crizotinib hydrochloride	6-Aminonicotinamide	Prednicarbate	Etelcalcetide HCl	Cyclophosphamide	Pralsetinib (BLU-667)	Rimiducid (AP1903)	Laropiprant	Palovarotene
	g	Empty	S4948	S5195	S2089	E0609	Empty	S2221	S8830	E0742	E2874	S4684	Empty
			Rucaparib	Rucaparib Camsylate	Fenoldopam	Methyl methanesulfonate		Apatinib (YN968D1) mesylate	Sotorasib (AMG510)	Melengestrol Acetate	Sofpironium bromide	Sildenafil
	h	Empty	S4967	S5738	S9973	E0650	S1469	S2345	S8926	E2438	E2876	Empty	Empty
			Ceritinib dihydrochloride	Megestrol	Flumatinib (HH-GV-678)	γ-Terpinene	Calcifediol	Podophyllotoxin (Podofilox)	Valemetostat (DS-3201)	Ginsenoside Rg3	pemafibrate
	Plate layout: L8000-21
		1	2	3	4	5	6	7	8	9	10	11	12
	a	Empty	S1037	S1345	S1648	S2008	S2527	S3146	S3861	S4108	S4236	S4606	Empty
			Perifosine (KRX-0401)	Granisetron HCl	Cytarabine (U-19920A)	Taurine	Methacycline HCl	Tripelennamine HCl	Sodium Demethylcantharidate	Clodronate Disodium	Proflavine Hemisulfate	Glutathione
	b	Empty	S1116	S1375	Empty	S2048	S2539	S3148	S3963	S4117	S4245	S4653	Empty
			Palbociclib (PD-0332991) HCl	Dorzolamide HCl		Clindamycin Phosphate	Lomefloxacin HCl	Ibandronate sodium monohydrate	DL-Glutamine	Histamine Phosphate	Sodium ascorbate	L-Ornithine hydrochloride
	c	Empty	S1135	S1440	S1853	S2076	S3013	S3174	S3973	S4121	S4254	S4671	Empty
			Pemetrexed (LY-231514) disodium	Varenicline Tartrate (CP 526555-18)	Penicillamine	Lisinopril dihydrate	Plerixafor (AMD3100) 8HCl	L-Arginine HCl (L-Arg)	L-SelenoMethionine	Succinylcholine Chloride Dihydrate	Apramycin Sulfate	Cefradine
	d	Empty	S1149	S1506	S1857	S2129	S3048	S3649	S4008	S4127	S4298	S4248	Empty
			Gemcitabine (LY-188011) HCl	Perindopril Erbumine	Etidronate	Fudosteine	Solifenacin succinate	Ceftazidime	Pemirolast potassium	Terbutaline Sulfate	Amifostine trihydrate	Refametinib
	e	Empty	Empty	S1516	S1875	S2133	S3050	S3662	S4027	S4144	S4360	S4700	Empty
				Cidofovir	Tranexamic Acid	Gabapentin	Palonosetron HCl	Pirenzepine dihydrochloride	Flavoxate HCl	Amprolium HCl	Tolmetin Sodium	4-Aminobutyric acid (GABA)
	f	Empty	Empty	S1518	S1984	S2462	S3056	S3667	S4028	S4157	S4430	S4740	Empty
				Ibuprofen Lysine	Ticlopidine HCl	Donepezil HCl	Miltefosine	Imipenem	Dexamethasone Sodium Phosphate	Chloroquine diphosphate	Hydroxychloroquine Sulfate (NSC 4375)	Sodium ferulate
	g	Empty	S1311	S1579	S1995	S2490	S3058	S3748	S4030	S4158	S4575	S4741	Empty
			Pamidronate Disodium	Palbociclib (PD0332991) Isethionate	Procarbazine HCl	Neostigmine Bromide	Danofloxacin Mesylate	Acamprosate Calcium	Gentamicin Sulfate	Ceftriaxone disodium salt hemi (heptahydrate)	Pralidoxime chloride	Danshensu
	h	Empty	S1339	S1624	S1999	S2507	S3072	S3752	S4094	S4183	S4582	S4993	Empty
			Galanthamine HBr	Alendronate sodium trihydrate	Sodium butyrate	Salbutamol Sulfate	(R)-baclofen	isoleucine	Tetramisole HCl	Paromomycin Sulfate	Eflornithine (MDL-71782) hydrochloride hydrate	Timonacic
	Plate layout: L8000-22
		1	2	3	4	5	6	7	8	9	10	11	12
	a	Empty	S5097	S5545	S9353	P1084	Empty	S2542	Empty	Empty	Empty	Empty	Empty
			Methotrexate disodium	DL-Serine	L-serine	Desmopressin Acetate		Phenformin (NSC-756501) HCl
	b	Empty	S5131	S5660	P1011	P1085	S3096	Empty	Empty	Empty	Empty	Empty	Empty
			Homotaurine	Clodronate disodium tetrahydrate	Eptifibatide Acetate	Angiotensin II human Acetate	L-Histidine monohydrochloride monohydrate
	c	Empty	S5136	S5706	Empty	Empty	S1314	Empty	Empty	Empty	Empty	Empty	Empty
			Calcium folinate	Edetate Trisodium			Zoledronic acid (ZOL 446)
	d	Empty	S5267	S6023	P1017	S1671	S6289	Empty	Empty	Empty	Empty	Empty	Empty
			Nylidrin Hydrochloride	Creatine monohydrate	Octreotide (SMS 201-995) acetate	(6-)ε-​Aminocaproic acid	Gentamicin
	e	Empty	S5384	S6445	P1025	S3076	S6872	Empty	Empty	Empty	Empty	Empty	Empty
			UTP Trisodium Salt	Chlorophyllin (sodium copper salt)	Atosiban Acetate	Foscarnet Sodium	Merbromin
	f	Empty	S5524	S6488	P1030	S4519	E0532	Empty	Empty	Empty	Empty	Empty	Empty
			Spermine Tetrahydrochloride	Gadoxetate sodium	Salmon Calcitonin Acetate	Citric acid trilithium salt tetrahydrate	Menotropin
	g	Empty	S5526	Empty	P1039	S2441	E2638	Empty	Empty	Empty	Empty	Empty	Empty
			β-Alanine		Somatostatin Acetate	Estramustine phosphate sodium	Tricine
	h	Empty	S5533	S7785	Empty	P1088	Empty	Empty	Empty	Empty	Empty	Empty	Empty
			Tobramycin sulfate	Pemetrexed Disodium Hydrate		Lanreotide acetate
	Plate layout: L8000-23
		1	2	3	4	5	6	7	8	9	10	11	12
	a	Empty	S1023	S1507	S1837	S2206	S2920	S4262	S8229	Empty	Empty	Empty	Empty
			Erlotinib (OSI-774) HCl	Irbesartan	Flubendazole	Fostamatinib (R788) disodium	Mozavaptan	Ebastine	Brigatinib (AP26113)
	b	Empty	S1046	S1509	S1851	S2251	S3059	S4605	S5098	Empty	Empty	Empty	Empty
			Vandetanib (ZD6474)	Norfloxacin	Oxibendazole	(-)-Huperzine A (HupA)	Enrofloxacin	Folic acid	Gefitinib hydrochloride
	c	Empty	S1211	S1615	S1977	S2292	S3770	S4642	S1502	Empty	Empty	Empty	Empty
			Imiquimod (R-837)	Risperidone	Sarafloxacin HCl	Diosmin	Sodium Aescinate	Dolutegravir Sodium	Cephalexin
	d	Empty	S1288	S1617	S1986	S2476	S3801	S5018	S4482	Empty	Empty	Empty	Empty
			Camptothecin (NSC-100880)	Sulfapyridine	Meclizine 2HCl	Itraconazole (R 51211)	Sodium Houttuyfonate	Mebhydrolin napadisylate	Palbociclib
	e	Empty	S1353	S1642	S2035	S2530	S3821	S5232	E0524	Empty	Empty	Empty	Empty
			Ketoconazole (R 41400)	Methyldopa	Epalrestat (ONO-2235)	7-Aminocephalosporanic acid	Nuciferine	Alectinib (CH5424802) hydrochloride	Spinosad
	f	Empty	S1424	S1698	S2047	S2582	S3891	S5677	S9464	Empty	Empty	Empty	Empty
			Prazosin HCl	Torsemide	Lornoxicam	Trazodone HCl	Vincamine	Xanthopterin Hydrate	Tranylcypromine Sulfate
	g	Empty	S1463	S1707	S2110	S2597	S4033	S7128	Empty	Empty	Empty	Empty	Empty
			Ofloxacin	Eplerenone (CGP 30083)	Vinpocetine	Oseltamivir Phosphate	Sennoside A	Tazemetostat (EPZ-6438)
	h	Empty	S1464	S1724	S2150	S2788	S4126	S7756	Empty	Empty	Empty	Empty	Empty
			Marbofloxacin	Paliperidone	Neratinib (HKI-272)	Capmatinib (INCB28060)	Retinyl (Vitamin A) Palmitate	Indoximod (NLG-8189）
	Plate layout: L8000-24
		1	2	3	4	5	6	7	8	9	10	11	12
	a	Empty	Empty	S5650	Empty	Empty	Empty	Empty	Empty	Empty	Empty	Empty	Empty
				Sodium Hyaluronate
	b	Empty	S1911	Empty	Empty	Empty	Empty	Empty	Empty	Empty	Empty	Empty	Empty
			Disodium Cromoglycate
	c	Empty	S2106	S2095	Empty	Empty	Empty	Empty	Empty	Empty	Empty	Empty	Empty
			Azasetron HCl	Fosinopril Sodium
	d	Empty	S2562	Empty	Empty	Empty	Empty	Empty	Empty	Empty	Empty	Empty	Empty
			Hydralazine HCl
	e	Empty	S4067	Empty	Empty	Empty	Empty	Empty	Empty	Empty	Empty	Empty	Empty
			Deferiprone
	f	Empty	S4226	Empty	Empty	Empty	Empty	Empty	Empty	Empty	Empty	Empty	Empty
			Minocycline (CL 59806) HCl
	g	Empty	S4694	Empty	Empty	Empty	Empty	Empty	Empty	Empty	Empty	Empty	Empty
			Alosetron Hydrochloride
	h	Empty	S8030	Empty	Empty	Empty	Empty	Empty	Empty	Empty	Empty	Empty	Empty
			Plerixafor (AMD3100)

## Sheet: Chemical Data-1733 cpds
Cat	Name	Plate Location	Rack Number	Formulation	Target	Pathway	Information	M.w.	CAS Number	DMSO (mg/mL)Max Solubility	DMSO (mM)Max Solubility	Water (mg/mL)Max Solubility	Water (mM)Max Solubility	URL	Formula	Form	Synonyms	SMILES	ALogP	HBA_Count	HBD_Count	RotatableBond
S1005	Axitinib (AG 013736)	a2	L8000-01	in 10mM DMSO	c-Kit,PDGFR,VEGFR	Protein Tyrosine Kinase	Axitinib (AG 013736) is a multi-target inhibitor of VEGFR1, VEGFR2, VEGFR3, PDGFRβ and c-Kit with IC50 of 0.1 nM, 0.2 nM, 0.1-0.3 nM, 1.6 nM and 1.7 nM in Porcine aorta endothelial cells, respectively.	386.47	319460-85-0	35	90.56	<1	N/A	http://selleckchem.com/products/Axitinib.html	C22H18N4OS	free base	AG 013736	CNC(=O)C1=CC=CC=C1SC2=CC3=C(C=C2)C(=N[NH]3)\C=C\C4=CC=CC=N4	4.492	3	2	5
S1007	Roxadustat (FG-4592)	b2	L8000-01	in 10mM DMSO	Ferroptosis,HIF	Angiogenesis	Roxadustat (FG-4592) is an HIF-α prolyl hydroxylase inhibitor in a cell-free assay, stabilizes HIF-2 and induces EPO production. Roxadustat potentiates RSL3 induced ferroptosis. Phase 3.	352.34	808118-40-3	70	198.67	<1	N/A	http://selleckchem.com/products/fg-4592.html	C19H16N2O5	free base	ASP1517	CC1=NC(=C(O)C2=C1C=C(OC3=CC=CC=C3)C=C2)C(=O)NCC(O)=O	2.306	4	2	5
S1008	Selumetinib (AZD6244)	c2	L8000-01	in 10mM DMSO	Apoptosis related,MEK	MAPK	Selumetinib (AZD6244, ARRY-142886) is a potent, highly selective MEK inhibitor with IC50 of 14 nM for MEK1 and Kd value of 530 nM for MEK2. It also inhibits ERK1/2 phosphorylation with IC50 of 10 nM, no inhibition to p38α, MKK6, EGFR, ErbB2, ERK2, B-Raf, etc. Selumetinib suppresses cell proliferation, migration and trigger apoptosis. Phase 3.	457.68	606143-52-6	91	198.83	<1	N/A	http://selleckchem.com/products/AZD6244.html	C17H15BrClFN4O3	free base	ARRY-142886	C[N]1C=NC2=C(F)C(=C(C=C12)C(=O)NOCCO)NC3=CC=C(Br)C=C3Cl	3.234	3	3	6
S1010	Nintedanib (BIBF 1120)	d2	L8000-01	in 10mM DMSO	FGFR,PDGFR,Src,VEGFR	Protein Tyrosine Kinase	Nintedanib (BIBF 1120, Intedanib, Vargatef, Ofev) is a potent triple angiokinase inhibitor for VEGFR1/2/3, FGFR1/2/3 and PDGFRα/β with IC50 of 34 nM/13 nM/13 nM, 69 nM/37 nM/108 nM and 59 nM/65 nM in cell-free assays. Phase 3.	539.62	656247-17-5	6	11.12	<1	N/A	http://selleckchem.com/products/BIBF1120.html	C31H33N5O4	free base	Intedanib, Vargatef, Ofev	COC(=O)C1=CC=C\2C(=C1)NC(=O)C2=C(NC3=CC=C(C=C3)N(C)C(=O)CN4CCN(C)CC4)/C5=CC=CC=C5	2.965	4	2	8
S1011	Afatinib (BIBW2992)	e2	L8000-01	in 10mM DMSO	Autophagy,EGFR,HER2	Protein Tyrosine Kinase	Afatinib (BIBW2992) inhibits EGFR/ErbB irreversibly in vitro with IC50 of 0.5, 0.4, 10, 14, 1 nM for EGFRwt, EGFR L858R , EGFR L858R/T790M ErbB2 (HER2) and ErbB4 (HER4), respectively. Afatinib induces autophagy.	485.94	850140-72-6	97	199.61	<1	N/A	http://selleckchem.com/products/BIBW2992.html	C24H25ClFN5O3	Free Base	BIBW2992	CN(C)C/C=C/C(=O)NC1=CC2=C(NC3=CC=C(F)C(=C3)Cl)N=CN=C2C=C1OC4CCOC4	3.917	5	2	8
S1013	Bortezomib (PS-341)	f2	L8000-01	in 10mM DMSO	Autophagy,Cathepsin B,Cysteine Protease,ERK,NF-κB,Proteasome	Proteases	Bortezomib (PS-341, Velcade, LDP-341, MLM341, NSC 681239) is a potent 20S proteasome inhibitor with Ki of 0.6 nM. It exhibits favorable selectivity towards tumor cells over normal cells. Bortezomib (PS-341) inhibits NF-κB and induces ERK phosphorylation to suppress cathepsin B and inhibit the catalytic process of autophagy in ovarian cancer and other solid tumors.	384.24	179324-69-7	76	197.79	<1	N/A	http://selleckchem.com/products/Bortezomib.html	C19H25BN4O4	Free Base	Velcade, LDP-341, MLM341, NSC 681239,PS-341	CC(C)CC(NC(=O)C(CC1=CC=CC=C1)NC(=O)C2=NC=CN=C2)B(O)O	2.183	4	2	9
S1014	Bosutinib (SKI-606)	g2	L8000-01	in 10mM DMSO	Autophagy,Bcr-Abl,ERK,S6 Kinase,Src,STAT	Angiogenesis	Bosutinib (SKI-606) is a novel, dual Src/Abl inhibitor with IC50 of 1.2 nM and 1 nM in cell-free assays, respectively. Bosutinib also effectively decreases the activity of PI3K/AKT/mTOR, MAPK/ERK and JAK/STAT3 signaling pathways by blocking the phosphorylation levels of p-ERK, p-S6, and p-STAT3. Bosutinib promotes autophagy.	530.45	380843-75-4	100	188.52	<1	N/A	http://selleckchem.com/products/Bosutinib.html	C26H29Cl2N5O3	free base	SKI-606	COC1=C(Cl)C=C(Cl)C(=C1)NC2=C(C=NC3=CC(=C(OC)C=C23)OCCCN4CCN(C)CC4)C#N	4.883	4	1	9
S1021	Dasatinib (BMS-354825)	h2	L8000-01	in 10mM DMSO	Apoptosis related,Autophagy,Bcr-Abl,c-Kit,Src	Angiogenesis	Dasatinib (BMS-354825) is a novel, potent and multi-targeted inhibitor that targets Abl, Src and c-Kit, with IC50 of <1 nM, 0.8 nM and 79 nM in cell-free assays, respectively. Dasatinib induces autophagy and apoptosis with anti-tumor activity.	488.01	302962-49-8	98	200.82	<1	N/A	http://selleckchem.com/products/Dasatinib.html	C22H26ClN7O2S	free base	BMS-354825	CC1=NC(=CC(=N1)N2CCN(CCO)CC2)NC3=NC=C(S3)C(=O)NC4=C(Cl)C=CC=C4C	3.439	4	3	7
S1022	Ridaforolimus (Deforolimus, MK-8669)	a3	L8000-01	in 10mM DMSO	FKBP,mTOR	PI3K/Akt/mTOR	Ridaforolimus (Deforolimus, MK-8669, AP23573) is a selective mTOR inhibitor with IC50 of 0.2 nM in HT-1080 cell line; while not classified as a prodrug, mTOR inhibition and FKBP12 binding is similar to rapamycin. Phase 3.	990.21	572924-54-0	198	199.96	<1	N/A	http://selleckchem.com/products/Deforolimus.html	C53H84NO14P	free base	AP23573	COC1CC(CCC1O[P](C)(C)=O)CC(C)C2CC(=O)C(C)\C=C(C)\C(O)C(OC)C(=O)C(C)CC(C)/C=C/C=C/C=C(C)/C(CC3CCC(C)C(O)(O3)C(=O)C(=O)N4CCCCC4C(=O)O2)OC	6.303	12	1	8
S1025	Gefitinib (ZD1839)	b3	L8000-01	in 10mM DMSO	Apoptosis related,Autophagy,EGFR	Protein Tyrosine Kinase	Gefitinib (ZD-1839, Iressa) is an EGFR inhibitor for Tyr1173, Tyr992, Tyr1173 and Tyr992 in the NR6wtEGFR and NR6W cells with IC50 of 37 nM, 37nM, 26 nM and 57 nM, respectively. Gefitinib promotes autophagy and apoptosis of lung cancer cells via blockade of the PI3K/AKT/mTOR pathway.	446.9	184475-35-2	89	199.15	<1	N/A	http://selleckchem.com/products/Gefitinib.html	C22H24ClFN4O3	free base	Iressa,ZD1839	COC1=C(OCCCN2CCOCC2)C=C3C(=NC=NC3=C1)NC4=CC=C(F)C(=C4)Cl	4.203	5	1	8
S1026	Imatinib (STI571) Mesylate	c3	L8000-01	in 10mM DMSO	Autophagy,Bcr-Abl,c-Kit,PDGFR	Protein Tyrosine Kinase	Imatinib (STI571, CGP057148B, Gleevec) Mesylate is an orally bioavailability mesylate salt of Imatinib, which is a multi-target inhibitor of v-Abl, c-Kit and PDGFR with IC50 of 0.6 μM, 0.1 μM and 0.1 μM in cell-free or cell-based assays, respectively. Imatinib Mesylate (STI571) induces autophagy.	589.71	220127-57-1	118	200.1	118	200.1	http://selleckchem.com/products/Imatinib-Mesylate.html	C29H31N7O.CH4SO3	Mesylate	Gleevec, Glivec, CGP-57148B,STI571	CN1CCN(CC1)CC2=CC=C(C=C2)C(=O)NC3=CC=C(C)C(=C3)NC4=NC=CC(=N4)C5=CC=CN=C5.C[S](O)(=O)=O	3.806	4	2	7
S1028	Lapatinib (GW-572016) Ditosylate	d3	L8000-01	in 10mM DMSO	EGFR,HER2	Protein Tyrosine Kinase	Lapatinib (GW-572016) Ditosylate is a potent EGFR and ErbB2 inhibitor with IC50 of 10.8 and 9.2 nM in cell-free assays, respectively.	925.46	388082-77-7	100	108.05	<1	N/A	http://selleckchem.com/products/Lapatinib-Ditosylate.html	C29H26ClFN4O4S.2C7H8O3S	Ditosylat	GW-572016	CC1=CC=C(C=C1)[S](O)(=O)=O.CC2=CC=C(C=C2)[S](O)(=O)=O.C[S](=O)(=O)CCNCC3=CC=C(O3)C4=CC=C5N=CN=C(NC6=CC=C(OCC7=CC=CC(=C7)F)C(=C6)Cl)C5=C4	9.339	6	2	13
S1029	Lenalidomide (CC-5013)	e3	L8000-01	in 10mM DMSO	Apoptosis related,Caspase,E3 Ligase ,E3 ligase Ligand,TNF-alpha,VEGFR	Ubiquitin	Lenalidomide (CC-5013) is a TNF-α secretion inhibitor with IC50 of 13 nM in PBMCs. Lenalidomide (CC-5013) is a ligand of ubiquitin E3 ligase cereblon (CRBN), and it causes selective ubiquitination and degradation of two lymphoid transcription factors, IKZF1 and IKZF3, by the CRBN-CRL4 ubiquitin ligase. Lenalidomide promotes cleaved caspase-3 expression and inhibit VEGF expression and induces apop…	259.26	191732-72-6	52	200.57	<1	N/A	https://www.selleckchem.com/products/lenalidomide-s1029.html	C13H13N3O3	free base	CC-5013	NC1=C2CN(C3CCC(=O)NC3=O)C(=O)C2=CC=C1	-0.515	3	2	1
S1030	Panobinostat (LBH589)	f3	L8000-01	in 10mM DMSO	Apoptosis related,Autophagy,HDAC,HIV Protease	Epigenetics	Panobinostat (LBH589, NVP-LBH589) is a novel broad-spectrum HDAC inhibitor with IC50 of 5 nM in a cell-free assay. Panobinostat (LBH589) induces autophagy and apoptosis. Panobinostat effectively disrupts HIV latency in vivo. Phase 3.	349.43	404950-80-7	69	197.46	<1	N/A	http://selleckchem.com/products/LBH-589.html	C21H23N3O2	Free Base	NVP-LBH589	CC1=C(CCNCC2=CC=C(\C=C\C(=O)NO)C=C2)C3=C([NH]1)C=CC=C3	3.194	1	3	7
S1033	Nilotinib (AMN-107)	g3	L8000-01	in 10mM DMSO	AMPK,Autophagy,Bcr-Abl	Angiogenesis	Nilotinib (AMN-107) is a selective Bcr-Abl inhibitor with IC50 less than 30 nM in Murine myeloid progenitor cells. Nilotinib induces autophagy through AMPK activition.	529.52	641571-10-0	27	50.99	<1	N/A	http://selleckchem.com/products/Nilotinib.html	C28H22F3N7O	free base	AMN-107	CC1=C[N](C=N1)C2=CC(=CC(=C2)C(F)(F)F)NC(=O)C3=CC=C(C)C(=C3)NC4=NC=CC(=N4)C5=CN=CC=C5	5.084	5	2	7
S1035	Pazopanib HCl (GW786034 HCl)	h3	L8000-01	in 10mM DMSO	Autophagy,c-Kit,CSF-1R,FGFR,PDGFR,VEGFR	Protein Tyrosine Kinase	Pazopanib HCl (GW786034 HCl) is a novel multi-target inhibitor of VEGFR1, VEGFR2, VEGFR3, PDGFR, FGFR, c-Kit and c-Fms with IC50 of 10 nM, 30 nM, 47 nM, 84 nM, 74 nM, 140 nM and 146 nM in cell-free assays, respectively. Pazopanib induces autophagic Type II cell death.	473.98	635702-64-6	17	35.87	<1	N/A	http://selleckchem.com/products/Pazopanib-Hydrochloride.html	C21H23N7O2S.HCl	Hydrochloride	GW786034 HCl	Cl.C[N]1N=C2C=C(C=CC2=C1C)N(C)C3=NC(=NC=C3)NC4=CC=C(C)C(=C4)[S](N)(=O)=O	4.123	5	2	5
S1039	Rapamycin (AY-22989)	a4	L8000-01	in 10mM DMSO	Antineoplastic and Immunosuppressive Antibiotics,Autophagy,mTOR	PI3K/Akt/mTOR	Rapamycin (AY-22989, Rapamune, Sirolimus, NSC-2260804,AY-22989) is a specific mTOR inhibitor with IC50 of ~0.1 nM HEK293 cells.	914.18	53123-88-9	20	21.88	<1	N/A	http://selleckchem.com/products/Rapamycin.html	C51H79NO13	free base	Rapamune, Sirolimus, NSC-2260804,AY-22989	COC1CC(CCC1O)CC(C)C2CC(=O)C(C)\C=C(/C)C(O)C(OC)C(=O)C(C)CC(C)/C=C/C=C/C=C(C)/C(CC3CCC(C)C(O)(O3)C(=O)C(=O)N4CCCCC4C(=O)O2)OC	6.295	10	2	6
S1040	Sorafenib (BAY 43-9006) tosylate	b4	L8000-01	in 10mM DMSO	Apoptosis related,Autophagy,c-Kit,Ferroptosis,FGFR,FLT3,PDGFR,Raf,VEGFR	MAPK	Sorafenib tosylate (BAY 43-9006 tosylate,NSC-724772 tosylate) is a multikinase inhibitor of Raf-1 and B-Raf with IC50 of 6 nM and 22 nM in cell-free assays, respectively. Sorafenib Tosylate inhibits VEGFR-2, VEGFR-3, PDGFR-β, Flt-3 and c-KIT with IC50 of 90 nM, 20 nM, 57 nM, 59 nM and 68 nM, respectively. Sorafenib Tosylate induces autophagy and apoptosis and activates ferroptosis with anti-tumor…	637.03	475207-59-1	127	199.36	0.01	0.02	http://selleckchem.com/products/Sorafenib-Tosylate.html	C21H16ClF3N4O3.C7H8O3S	Tosylate	BAY 43-9006 tosylate,NSC-724772 tosylate	CNC(=O)C1=CC(=CC=N1)OC2=CC=C(NC(=O)NC3=CC=C(Cl)C(=C3)C(F)(F)F)C=C2.CC4=CC=C(C=C4)[S](O)(=O)=O	5.824	4	3	7
S1042	Sunitinib (SU11248) malate	c4	L8000-01	in 10mM DMSO	Apoptosis related,c-Kit,IRE1,Mitophagy,PDGFR,VEGFR	Protein Tyrosine Kinase	Sunitinib (SU11248) malate is a multi-targeted RTK inhibitor targeting VEGFR2 (Flk-1) and PDGFRβ with IC50 of 80 nM and 2 nM in cell-free assays, and also inhibits c-Kit. Sunitinib Malate effectively inhibits autophosphorylation of Ire1α. Sunitinib Malate increases both death receptor and mitochondrial-dependent apoptosis.	532.56	341031-54-7	15	28.17	<1	N/A	http://selleckchem.com/products/Sunitinib-Malate-(Sutent).html	C22H27FN4O2.C4H6O5	Malate	N/A	CCN(CC)CCNC(=O)C1=C(C)[NH]C(=C1C)/C=C/2C(=O)NC3=CC=C(F)C=C23.OC(CC(O)=O)C(O)=O	-1.049	4	4	10
S1044	Temsirolimus (CCI-779)	d4	L8000-01	in 10mM DMSO	Apoptosis related,Autophagy,mTOR	PI3K/Akt/mTOR	Temsirolimus (CCI-779, NSC 683864) is a specific mTOR inhibitor with IC50 of 1.76 μM in a cell-free assay. Temsirolimus induces autophagy and apoptosis.	1030.29	162635-04-3	67	65.03	<1	N/A	http://selleckchem.com/products/Temsirolimus.html	C56H87NO16	free base	NSC 683864,CCI-779	COC1CC(CCC1OC(=O)C(C)(CO)CO)CC(C)C2CC(=O)C(C)\C=C(C)\C(O)C(OC)C(=O)C(C)CC(C)/C=C/C=C/C=C(C)/C(CC3CCC(C)C(O)(O3)C(=O)C(=O)N4CCCCC4C(=O)O2)OC	6.039	12	3	11
S1047	Vorinostat (SAHA)	e4	L8000-01	in 10mM DMSO	Autophagy,HDAC,HPV	Epigenetics	Vorinostat (SAHA,MK0683, Suberoylanilide hydroxamic acid, Zolinza) is an HDAC inhibitor with IC50 of ~10 nM in a cell-free assay. Vorinostat abrogates productive HPV-18 DNA amplification.	264.3	149647-78-9	52	196.75	<1	N/A	http://selleckchem.com/products/Vorinostat-saha.html	C14H20N2O3	free base	SAHA,MK0683, Suberoylanilide hydroxamic acid, Zolinza	ONC(=O)CCCCCCC(=O)NC1=CC=CC=C1	2.005	2	2	8
S1053	Entinostat (MS-275)	f4	L8000-01	in 10mM DMSO	Apoptosis related,Autophagy,HDAC	Epigenetics	Entinostat (MS-275, SNDX-275) strongly inhibits HDAC1 and HDAC3 with IC50 of 0.51 μM and 1.7 μM in cell-free assays, compared with HDACs 4, 6, 8, and 10. Entinostat induces autophagy and apoptosis. Phase 3.	376.41	209783-80-2	75	199.25	<1	N/A	http://selleckchem.com/products/MS-275.html	C21H20N4O3	free base	SNDX-275	NC1=CC=CC=C1NC(=O)C2=CC=C(CNC(=O)OCC3=CN=CC=C3)C=C2	2.071	4	3	7
S1055	Enzastaurin (LY317615)	g4	L8000-01	in 10mM DMSO	PKC	TGF-beta/Smad	Enzastaurin (LY317615) is a potent PKCβ selective inhibitor with IC50 of 6 nM in cell-free assays, 6- to 20-fold selectivity against PKCα, PKCγ and PKCε. Phase 3.	515.61	170364-57-5	30	58.18	<1	N/A	http://selleckchem.com/products/Enzastaurin.html	C32H29N5O2	free base	N/A	C[N]1C=C(C2=CC=CC=C12)C3=C(C(=O)NC3=O)C4=C[N](C5CCN(CC5)CC6=NC=CC=C6)C7=CC=CC=C47	4.32	3	1	5
S1060	Olaparib (AZD2281)	h4	L8000-01	in 10mM DMSO	Autophagy,Mitophagy,PARP	DNA Damage/DNA Repair	Olaparib (AZD2281, KU0059436) is a selective inhibitor of PARP1/2 with IC50 of 5 nM/1 nM in cell-free assays, 300-times less effective against tankyrase-1. Olaparib induces significant autophagy that is associated with mitophagy in cells with BRCA mutations.	434.46	763113-22-0	86	197.95	N/A	N/A	http://selleckchem.com/products/AZD2281(Olaparib).html	C24H23FN4O3	free base	Ku-0059436	FC1=C(C=C(CC2=NNC(=O)C3=C2C=CC=C3)C=C1)C(=O)N4CCN(CC4)C(=O)C5CC5	2.127	4	1	4
S1064	Masitinib (AB1010)	a5	L8000-01	in 10mM DMSO	c-Kit,PDGFR	Protein Tyrosine Kinase	Masitinib is a novel inhibitor for Kit (c-Kit) and PDGFRα/β with IC50 of 200 nM and 540 nM/800 nM, weak inhibition to ABL and c-Fms. Phase 3.	498.64	790299-79-5	100	200.55	<1	N/A	http://selleckchem.com/products/Masitinib-(AB1010).html	C28H30N6OS	free base	N/A	CN1CCN(CC1)CC2=CC=C(C=C2)C(=O)NC3=CC(=C(C)C=C3)NC4=NC(=CS4)C5=CC=CN=C5	4.475	3	2	7
S1068	Crizotinib (PF-02341066)	b5	L8000-01	in 10mM DMSO	ALK,Autophagy,c-Met,ROS1	Protein Tyrosine Kinase	Crizotinib (PF-02341066) is a potent inhibitor of c-Met and ALK with IC50 of 11 nM and 24 nM in cell-based assays, respectively. It is also a potent ROS1 inhibitor with Ki value less than 0.025 nM. Crizotinib induces autophagy through inhibition of the STAT3 pathway in multiple lung cancer cell lines.	450.34	877399-52-5	9	19.98	<1	N/A	http://selleckchem.com/products/PF-2341066.html	C21H22Cl2FN5O	free base	PF-02341066	CC(OC1=C(N)N=CC(=C1)C2=C[N](N=C2)C3CCNCC3)C4=C(Cl)C=CC(=C4Cl)F	3.693	3	2	5
S1082	Vismodegib (GDC-0449)	c5	L8000-01	in 10mM DMSO	Hedgehog/Smoothened	Stem Cells & Wnt	Vismodegib (GDC-0449) is a potent, novel and specific hedgehog inhibitor with IC50 of 3 nM and also inhibits P-gp with IC50 of 3.0 μM in a cell-free assay.	421.3	879085-55-9	84	199.38	<1	N/A	http://selleckchem.com/products/GDC-0449.html	C19H14Cl2N2O3S	free base	GDC-0449	C[S](=O)(=O)C1=CC=C(C(=C1)Cl)C(=O)NC2=CC(=C(Cl)C=C2)C3=NC=CC=C3	4.265	4	1	4
S1085	Belinostat (PXD101)	d5	L8000-01	in 10mM DMSO	Autophagy,HDAC	Epigenetics	Belinostat (PXD101, NSC726630, PX-105684) is a novel HDAC inhibitor with IC50 of 27 nM in a cell-free assay, with activity demonstrated in cisplatin-resistant tumors. Belinostat (PXD101) induces autophagy.	318.35	866323-14-0	64	201.04	<1	N/A	http://selleckchem.com/products/Belinostat.html	C15H14N2O4S	free base	PXD101,NSC726630, PX-105684	ONC(=O)/C=C/C1=CC(=CC=C1)[S](=O)(=O)NC2=CC=CC=C2	1.8	3	2	5
S1098	Rucaparib (AG-014699) phosphate	e5	L8000-01	in 10mM DMSO	PARP	DNA Damage/DNA Repair	Rucaparib (AG-014699, PF-01367338) is an inhibitor of PARP with Ki of 1.4 nM for PARP1 in a cell-free assay, also showing binding affinity to eight other PARP domains. Phase 3.	421.36	459868-92-9	84	199.35	<1	N/A	http://selleckchem.com/products/AG-014699.html	C19H18FN3O.H3PO4	Phosphate	PF-01367338	CNCC1=CC=C(C=C1)C2=C3CCNC(=O)C4=CC(=CC(=C34)[NH]2)F.O[P](O)(O)=O	2.49	1	3	3
S1119	Cabozantinib (BMS-907351)	f5	L8000-01	in 10mM DMSO	Apoptosis related,Axl,c-Met,VEGFR	Protein Tyrosine Kinase	Cabozantinib (XL184, BMS-907351) is a potent VEGFR2 inhibitor with IC50 of 0.035 nM and also inhibits c-Met, Ret, Kit, Flt-1/3/4, Tie2, and AXL with IC50 of 1.3 nM, 4 nM, 4.6 nM, 12 nM/11.3 nM/6 nM, 14.3 nM and 7 nM in cell-free assays, respectively. Cabozantinib induces PUMA-dependent apoptosis in colon cancer cells via AKT/GSK-3β/NF-κB signaling pathway.	501.51	849217-68-1	100	199.4	<1	N/A	http://selleckchem.com/products/XL184.html	C28H24FN3O5	Free Base	XL184,BMS-907351	COC1=CC2=C(C=C1OC)C(=CC=N2)OC3=CC=C(NC(=O)C4(CC4)C(=O)NC5=CC=C(F)C=C5)C=C3	4.342	6	2	8
S1120	Everolimus (RAD001)	g5	L8000-01	in 10mM DMSO	Apoptosis related,Autophagy,FKBP,mTOR	PI3K/Akt/mTOR	Everolimus (RAD001, SDZ-RAD, Afinitor) is an mTOR inhibitor of FKBP12 with IC50 of 1.6-2.4 nM in a cell-free assay. Everolimus induces cell apoptosis and autophagy and inhibits tumor cells proliferation.	958.22	159351-69-6	100	104.36	<1	N/A	http://selleckchem.com/products/Everolimus(RAD001).html	C53H83NO14	free base	RAD001,SDZ-RAD, Afinitor	COC1CC(CCC1OCCO)CC(C)C2CC(=O)C(C)\C=C(C)\C(O)C(OC)C(=O)C(C)CC(C)/C=C/C=C/C=C(C)/C(CC3CCC(C)C(O)(O3)C(=O)C(=O)N4CCCCC4C(=O)O2)OC	6.164	11	2	9
S1137	Malotilate	h5	L8000-01	in 10mM DMSO	Lipoxygenase	Metabolism	Malotilate (NKK105) is a drug used for the treatment of liver cirrhosis. Malotilate is a liver protein metabolism improved compound, which selectively inhibit the 5-lipoxygenase.	288.38	59937-28-9	58	201.12	<1	N/A	http://selleckchem.com/products/Malotilate.html	C12H16O4S2	free base	NKK105	CC(C)OC(=O)C(C(=O)OC(C)C)=C1SC=CS1	2.363	4	0	6
S1144	Ivacaftor (VX-770)	a6	L8000-01	in 10mM DMSO	CFTR	Transmembrane Transporters	Ivacaftor (VX-770) is a selective potentiator of CFTR targeting G551D-CFTR and F508del-CFTR with EC50 of 100 nM and 25 nM in fisher rat thyroid cells, respectively.	392.49	873054-44-5	78	198.73	<1	N/A	http://selleckchem.com/products/VX-770.html	C24H28N2O3	free base	VX-770	CC(C)(C)C1=CC(=C(NC(=O)C2=CNC3=C(C=CC=C3)C2=O)C=C1O)C(C)(C)C	4.516	2	3	4
S1148	Docetaxel (RP56976)	b6	L8000-01	in 10mM DMSO	Microtubule Associated	Cytoskeletal Signaling	Docetaxel (RP56976, NSC 628503), an analog of paclitaxel, is an inhibitor of depolymerisation of microtubules by binding to stabilized microtubules.	807.88	114977-28-5	100	123.78	<1	N/A	http://selleckchem.com/products/Docetaxel(Taxotere).html	C43H53NO14	Free Base	NSC 628503,RP56976	CC(=O)OC12COC1CC(O)C3(C)C2C(OC(=O)C4=CC=CC=C4)C5(O)CC(OC(=O)C(O)C(NC(=O)OC(C)(C)C)C6=CC=CC=C6)C(=C(C(O)C3=O)C5(C)C)C	2.586	10	4	13
S1150	Paclitaxel (NSC 125973)	c6	L8000-01	in 10mM DMSO	ADC Cytotoxin,Antineoplastic and Immunosuppressive Antibiotics,Autophagy,Microtubule Associated	Cytoskeletal Signaling	Paclitaxel (NSC 125973, PTX, Taxol, Onxal, Abraxane) is a microtubule polymer stabilizer with IC50 of 0.1 pM in human endothelial cells.	853.91	33069-62-4	171	200.26	<1	N/A	http://selleckchem.com/products/Paclitaxel(Taxol).html	C47H51NO14	free base	PTX, Taxol, Onxal, Abraxane,NSC 125973	CC(=O)OC1C(=O)C2(C)C(O)CC3OCC3(OC(C)=O)C2C(OC(=O)C4=CC=CC=C4)C5(O)CC(OC(=O)C(O)C(NC(=O)C6=CC=CC=C6)C7=CC=CC=C7)C(=C1C5(C)C)C	3.055	11	3	14
S1156	Capecitabine (RO 09-1978)	d6	L8000-01	in 10mM DMSO	Apoptosis related,DNA/RNA Synthesis	DNA Damage/DNA Repair	Capecitabine (RO 09-1978) is a tumor-selective fluoropyrimidine carbamate, which achieves higher intratumoral 5-FU level with lower toxicity than 5-FU. Capecitabine treatment of HCT-15 cells causes condensation of DNA and induces apoptosis.	359.35	154361-50-9	72	200.36	6	16.7	http://selleckchem.com/products/Capecitabine(Xeloda).html	C15H22FN3O6	free base	RO 09-1978	CCCCCOC(=O)NC1=NC(=O)N(C=C1F)C2OC(C)C(O)C2O	0.82	5	3	7
S1162	Pretomanid (PA-824)	e6	L8000-01	in 10mM DMSO	Bacterial	Microbiology	PA-824 is an anti-tuberculosis drug for tuberculosis with MIC less than 2.8 μM.Phase 2.	359.26	187235-37-6	72	200.41	<1	N/A	http://selleckchem.com/products/pa-824.html	C14H12F3N3O5	free base	N/A	[O-][N+](=O)C1=C[N]2CC(COC2=N1)OCC3=CC=C(OC(F)(F)F)C=C3	4.301	4	0	6
S1164	Lenvatinib (E7080)	f6	L8000-01	in 10mM DMSO	c-Kit,c-RET,FGFR,PDGFR,VEGFR	Protein Tyrosine Kinase	Lenvatinib (E7080) is a multi-target inhibitor, mostly for VEGFR2(KDR)/VEGFR3(Flt-4) with IC50 of 4 nM/5.2 nM, less potent against VEGFR1/Flt-1, ~10-fold more selective for VEGFR2/3 against FGFR1, PDGFRα/β in cell-free assays. Lenvatinib (E7080) also inhibits FGFR1-4, PDGFR, Kit (c-Kit), RET (c-RET), and shows potent antitumor activities. Phase 3.	426.85	417716-92-8	40	93.71	<1	N/A	http://selleckchem.com/products/E7080.html	C21H19ClN4O4	free base	N/A	COC1=C(C=C2C(=CC=NC2=C1)OC3=CC(=C(NC(=O)NC4CC4)C=C3)Cl)C(N)=O	2.832	5	3	6
S1168	Valproic Acid (NSC 93819) sodium salt	g6	L8000-01	in 10mM DMSO	Autophagy,GABA Receptor,HDAC,Mitophagy,Notch,PGC-1α	Neuronal Signaling	Valproic Acid sodium salt (NSC 93819, Sodium valproate) is a HDAC inhibitor by selectively inducing proteasomal degradation of HDAC2, used in the treatment of epilepsy, bipolar disorder and prevention of migraine headaches. Valproic acid induces Notch1 signaling in small cell lung cancer (SCLC) cells. Valproic acid is under investigation for treatment of HIV and various cancers. Valproic acid (VP…	166.19	1069-66-5	33	198.57	33	198.57	http://selleckchem.com/products/Sodium-valproate.html	C8H15NaO2	Sodium salt	Sodium valproate,NSC 93819,2-Propylpentanoic Acid	CCCC(CCC)C(=O)O[Na]	1.275	0	0	5
S1178	Regorafenib (BAY 73-4506)	h6	L8000-01	in 10mM DMSO	Autophagy,c-Kit,c-RET,PDGFR,Raf,VEGFR	Protein Tyrosine Kinase	Regorafenib (BAY 73-4506,Fluoro-Sorafenib, Resihance, Stivarga) is a multi-target inhibitor for VEGFR1, VEGFR2, VEGFR3, PDGFRβ, Kit (c-Kit), RET (c-RET) and Raf-1 with IC50 of 13 nM/4.2 nM/46 nM, 22 nM, 7 nM, 1.5 nM and 2.5 nM in cell-free assays, respectively. Regorafenib induces autophagy.	482.82	755037-03-7	97	200.9	<1	N/A	http://selleckchem.com/products/BAY-73-4506.html	C21H15ClF4N4O3	free base	Fluoro-Sorafenib, Resihance, Stivarga,BAY 73-4506	CNC(=O)C1=CC(=CC=N1)OC2=CC(=C(NC(=O)NC3=CC=C(Cl)C(=C3)C(F)(F)F)C=C2)F	4.381	4	3	6
S1185	Ritonavir (ABT-538)	a7	L8000-01	in 10mM DMSO	Apoptosis related,COVID-19,HIV Protease,P450 (e.g. CYP17)	Proteases	Ritonavir (ABT-538, A 84538, RTV, Norvir, Norvir Softgel) is a Cytochrome P450 3A and Protease Inhibitor; Also inhibits Cytochrome P450 2D6, P-Glycoprotein and induces Cytochrome P450 2C19, Cytochrome P450 1A2, Cytochrome P450 2C9, Cytochrome P450 2B6 and UDP Glucuronosyltransferases. Ritonavir induces apoptosis.	720.94	155213-67-5	100	138.71	<1	N/A	http://selleckchem.com/products/Ritonavir.html	C37H48N6O5S2	free base	ABT-538,A 84538, RTV, Norvir, Norvir Softgel	CC(C)C(NC(=O)N(C)CC1=CSC(=N1)C(C)C)C(=O)NC(CC(O)C(CC2=CC=CC=C2)NC(=O)OCC3=CN=CS3)CC4=CC=CC=C4	4.978	6	4	18
S1188	Anastrozole (ZD-1033)	b7	L8000-01	in 10mM DMSO	Aromatase	Endocrinology & Hormones	Anastrozole (Arimidex,ZD-1033) is a third-generation nonsteroidal selective aromatase inhibitor. It may offer greater selectivity compared with other aromatase inhibitors, being without any intrinsic endocrine effects and with no apparent effect on the synthesis of adrenal steroids.	293.37	120511-73-1	59	201.11	<1	N/A	http://selleckchem.com/products/Anastrozole.html	C17H19N5	free base	Arimidex,ZD-1033	CC(C)(C#N)C1=CC(=CC(=C1)C[N]2C=NC=N2)C(C)(C)C#N	2.965	2	0	4
S1189	Aprepitant (MK-0869)	c7	L8000-01	in 10mM DMSO	CSF-1R,HIV,Interleukins,Neurokinin Receptor,TNF-alpha	Neuronal Signaling	Aprepitant (MK-0869, L-754030, Emend) is a potent and selective neurokinin-1 receptor antagonist with IC50 of 0.1 nM. Aprepitant reduces levels of pro-inflammatory cytokines including G-CSF, IL-6, IL-8 and TNFα. Aprepitant inhibits HIV infection of human macrophages.	534.43	170729-80-3	107	200.21	<1	N/A	http://selleckchem.com/products/Aprepitant.html	C23H21F7N4O3	free base	MK-0869, L-754030, Emend	CC(OC1OCCN(CC2=NNC(=O)N2)C1C3=CC=C(F)C=C3)C4=CC(=CC(=C4)C(F)(F)F)C(F)(F)F	4.635	4	2	8
S1190	Bicalutamide (ICI-176334)	d7	L8000-01	in 10mM DMSO	Androgen Receptor,Autophagy	Endocrinology & Hormones	Bicalutamide (ICI-176334) is an androgen receptor (AR) antagonist with IC50 of 0.16 μM in LNCaP/AR(cs)cell line. Bicalutamide promotes autophagy.	430.37	90357-06-5	86	199.83	<1	N/A	http://selleckchem.com/products/Bicalutamide(Casodex).html	C18H14F4N2O4S	free base	ICI-176334	CC(O)(C[S](=O)(=O)C1=CC=C(F)C=C1)C(=O)NC2=CC=C(C#N)C(=C2)C(F)(F)F	2.926	3	1	6
S1191	Fulvestrant (ICI-182780)	e7	L8000-01	in 10mM DMSO	Apoptosis related,Autophagy,Estrogen/progestogen Receptor	Endocrinology & Hormones	Fulvestrant (ICI-182780, ZD 9238, ZM 182780) is an estrogen receptor (ER) antagonist with IC50 of 0.94 nM in a cell-free assay. Fulvestrant also induces autophagy and apoptosis and has antitumor activity.	606.77	129453-61-8	100	164.81	<1	N/A	http://selleckchem.com/products/Fulvestrant.html	C32H47F5O3S	free base	ICI-182780, ZD 9238, ZM 182780	CC12CCC3C(C(CCCCCCCCC[S](=O)CCCC(F)(F)C(F)(F)F)CC4=C3C=CC(=C4)O)C1CCC2O	8.437	1	2	15
S1192	Raltitrexed	f7	L8000-01	in 10mM DMSO	DNA/RNA Synthesis,Thymidylate Synthase	DNA Damage/DNA Repair	Raltitrexed (ZD-1694) is a thymidylate synthase inhibitor with an IC50 of 9 nM for the inhibition of L1210 cell growth.	458.49	112887-68-0	91	198.48	<1	N/A	http://selleckchem.com/products/Raltitrexed.html	C21H22N4O6S	free base	ZD-1694, ICI-D1694, D1694	CN(CC1=CC2=C(C=C1)N=C(C)NC2=O)C3=CC=C(S3)C(=O)NC(CCC(O)=O)C(O)=O	1.528	5	2	9
S1193	Thalidomide (K17)	g7	L8000-01	in 10mM DMSO	E3 Ligase ,E3 ligase Ligand,TNF-alpha	Ubiquitin	Thalidomide (K17) was introduced as a sedative drug, immunomodulatory agent and also is investigated for treating symptoms of many cancers. Thalidomide inhibits cereblon (CRBN), a part of the cullin-4 E3 ubiquitin ligase complex CUL4-RBX1-DDB1.	258.23	50-35-1	51	197.5	<1	N/A	http://selleckchem.com/products/Thalidomide.html	C13H10N2O4	free base	K17	O=C1CCC(N2C(=O)C3=C(C=CC=C3)C2=O)C(=O)N1	0.097	4	1	1
S1196	Exemestane (FCE 24304)	h7	L8000-01	in 10mM DMSO	Aromatase	Endocrinology & Hormones	Exemestane (Aromasin,FCE24304, PNU155971,EXE) is an aromatase inhibitor, inhibits human placental and rat ovarian aromatase with IC50 of 30 nM and 40 nM, respectively.	296.4	107868-30-4	54	182.19	<1	N/A	http://selleckchem.com/products/Exemestane.html	C20H24O2	free base	Aromasin,FCE24304, PNU155971,EXE	CC12CCC3C(CC(=C)C4=CC(=O)C=CC34C)C1CCC2=O	3.606	2	0	0
S1197	Finasteride	a8	L8000-01	in 10mM DMSO	5-alpha Reductase	Endocrinology & Hormones	Finasteride (MK-906) is a potent, reversible inhibitor of the rat type 1 5 alpha-reductase with Ki of 10.2 nM, used in the treatment of benign prostatic hyperplasia (BPH) and male pattern baldness (MPB).	372.54	98319-26-7	75	201.32	<1	N/A	http://selleckchem.com/products/Finasteride.html	C23H36N2O2	free base	MK-906	CC(C)(C)NC(=O)C1CCC2C3CCC4NC(=O)C=CC4(C)C3CCC12C	3.174	2	2	2
S1199	Cladribine (RWJ 26251)	b8	L8000-01	in 10mM DMSO	Adenosine Deaminase,DNA/RNA Synthesis	Neuronal Signaling	Cladribine (RWJ 26251, Leustatin, 2-CdA, 2-chlorodeoxyadenosine, 2-Chloro-2′-deoxyadenosine, CldAdo, Jk 6251, NSC 105014) is an adenosine deaminase inhibitor for U266, RPMI8226, and MM1.S cells with IC50 of approximately 2.43 μM, 0.75 μM, and 0.18 μM, respectively.	285.69	4291-63-8	57	199.52	<1	N/A	http://selleckchem.com/products/Cladribine.html	C10H12ClN5O3	free base	Leustatin,2-CdA,2-Chloro-2′-deoxyadenosine,CldAdo,Jk 6251,NSC 105014,RWJ 26251	NC1=NC(=NC2=C1N=C[N]2C3CC(O)C(CO)O3)Cl	-0.259	4	3	2
S1200	Decitabine (NSC 127716)	c8	L8000-01	in 10mM DMSO	Apoptosis related,DNA Methyltransferase,Nucleoside Analog/Antimetabolite	Epigenetics	Decitabine (Deoxycytidine, Dacogen, 5-aza-2'-deoxycytidine, 5-AZA-dC, 5-aza-CdR,NSC 127716) is a DNA methyltransferase inhibitor, incorporating into DNA and resulting in hypomethylation of DNA and intra-S-phase arrest of DNA replication. It is used to treat myelodysplastic syndrome (MDS). Decitabine induces cell cycle arrest and apoptosis in various cancer cell lines.	228.21	2353-33-5	45	197.19	10	43.82	http://selleckchem.com/products/Decitabine.html	C8H12N4O4	free base	Deoxycytidine, Dacogen, 5-aza-2'-deoxycytidine, 5-AZA-dC, 5-aza-CdR,NSC 127716	NC1=NC(=O)N(C=N1)C2CC(O)C(CO)O2	-1.093	4	3	2
S1202	Dutasteride	d8	L8000-01	in 10mM DMSO	5-alpha Reductase	Endocrinology & Hormones	Dutasteride (GI198745, GG-745) is a dual 5-α reductase inhibitor that inhibits conversion of testosterone to dihydrotestosterone (DHT).	528.53	164656-23-9	62	117.31	<1	N/A	http://selleckchem.com/products/Dutasteride.html	C27H30F6N2O2	free base	GI198745, GG-745	CC12CCC3C(CCC4NC(=O)C=CC34C)C1CCC2C(=O)NC5=CC(=CC=C5C(F)(F)F)C(F)(F)F	5.703	2	2	4
S1204	Melatonin (NSC 113928)	e8	L8000-01	in 10mM DMSO	Apoptosis related,ATF/CREB & c-Fos/c-Jun,Autophagy,COX,Mitophagy,MT Receptor	GPCR & G Protein	Melatonin (NSC 113928, NSC 56423, N-Acetyl-5-methoxytryptamine,MT) is a MT receptor agonist, used as a dietary supplement. Melatonin is a selective ATF-6 inhibitor and downregulates COX-2. Melatonin enhances mitophagy and regulates the homeostasis of apoptosis and autophagy.	232.28	73-31-4	47	202.34	<1	N/A	http://selleckchem.com/products/Melatonin.html	C13H16N2O2	free base	NSC 56423, N-Acetyl-5-methoxytryptamine,NSC 113928,MT	COC1=CC2=C([NH]C=C2CCNC(C)=O)C=C1	1.555	2	2	4
S1206	Bisoprolol fumarate	f8	L8000-01	in 10mM DMSO	Adrenergic Receptor	Neuronal Signaling	Bisoprolol fumarate (EMD33512) is a selective type β1 adrenergic receptor blocker.	441.52	104344-23-2	88	199.31	88	199.31	http://selleckchem.com/products/Bisoprolol-Fumarate.html	C22H35NO8	fumarate	EMD33512	CC(C)NCC(O)COC1=CC=C(COCCOC(C)C)C=C1.OC(=O)\C=C\C(O)=O	-0.635	5	2	14
S1207	Tivozanib (AV-951)	g8	L8000-01	in 10mM DMSO	c-Kit,PDGFR,VEGFR	Protein Tyrosine Kinase	Tivozanib (AV-951, KRN-951) is a potent and selective VEGFR inhibitor for VEGFR1/2/3 with IC50 of 30 nM/6.5 nM/15 nM, and also inhibits PDGFR and c-Kit, low activity observed against FGFR-1, Flt3, c-Met, EGFR and IGF-1R. Phase 3.	454.86	475108-18-0	20	43.97	<1	N/A	http://selleckchem.com/products/AV-951.html	C22H19ClN4O5	free base	KRN-951	COC1=CC2=C(C=C1OC)C(=CC=N2)OC3=CC=C(NC(=O)NC4=NOC(=C4)C)C(=C3)Cl	4.039	7	2	6
S1208	Doxorubicin (Adriamycin) HCl	h8	L8000-01	in 10mM DMSO	ADC Cytotoxin,AMPK,Antibiotics,Antineoplastic and Immunosuppressive Antibiotics,Apoptosis related,HIV,Mitophagy,Topoisomerase	DNA Damage/DNA Repair	Doxorubicin (Adriamycin, NSC 123127, DOX, Hydroxydaunorubicin) HCl is an antibiotic agent that inhibits DNA topoisomerase II and induces DNA damage, mitophagy and apoptosis in tumor cells. Doxorubicin reduces basal phosphorylation of AMPK. Doxorubicin is used in the concomitant treatment of HIV-infected patients but is found to be at high risk of HBV reactivation.	579.98	25316-40-9	100	172.42	20	34.48	http://selleckchem.com/products/Adriamycin.html	C27H29NO11.HCl	Hydrochloride	NSC 123127, DOX, Doxorubicin hydrochloride, Hydroxydaunorubicin HCl,Adriamycin HCl	Cl.COC1=C2C(=O)C3=C(C(=C4CC(O)(CC(OC5CC(N)C(O)C(C)O5)C4=C3O)C(=O)CO)O)C(=O)C2=CC=C1	0.338	6	5	5
S1209	Fluorouracil (5-Fluorouracil, 5-FU)	a9	L8000-01	in 10mM DMSO	Apoptosis related,DNA/RNA Synthesis,HIV,Nucleoside Analog/Antimetabolite,Thymidylate Synthase	DNA Damage/DNA Repair	Fluorouracil (5-Fluorouracil, 5-FU, NSC 19893) is a DNA/RNA synthesis inhibitor, which interrupts nucleotide synthetic by inhibiting thymidylate synthase (TS) in tumor cells. Fluorouracil induces apoptosis and can be used in the treatment of HIV.	130.08	51-21-8	26	199.88	<1	N/A	http://selleckchem.com/products/Adrucil(Fluorouracil).html	C4H3FN2O2	free base	NSC 19893,5-Fluorouracil, 5-FU	FC1=CNC(=O)NC1=O	-1.102	2	2	0
S1210	Methotrexate (CL-14377)	b9	L8000-01	in 10mM DMSO	ADC Cytotoxin,DHFR	Metabolism	Methotrexate (CL14377, MTX, NCI-C04671, Amethopterin, WR19039, abitrexate), analog of folic acid, is a nonspecific inhibitor of the dihydrofolate reductase(DHFR) of bacteria and cancerous cells as well as normal cells. It forms an inactive ternary complex with DHFR and NADPH. Methotrexate (MTX) induces apoptosis.	454.44	59-05-2	90	198.05	<1	N/A	http://selleckchem.com/products/Abitrexate.html	C20H22N8O5	free base	NCI-C04671, Amethopterin, CL14377, WR19039, abitrexate	CN(CC1=NC2=C(N)N=C(N)N=C2N=C1)C3=CC=C(C=C3)C(=O)NC(CCC(O)=O)C(O)=O	0.114	7	3	9
S1212	Bendamustine (SDX105) HCl	c9	L8000-01	in 10mM DMSO	DNA/RNA Synthesis	DNA Damage/DNA Repair	Bendamustine (SDX-105, Cytostasane) HCl is a DNA-damaging agent with IC50 of 50 μM in cell-free assay.	394.72	3543-75-7	78	197.61	2	5.07	http://selleckchem.com/products/Bendamustine-Hydrochloride.html	C16H21Cl2N3O2.HCl	Hydrochloride	Cytostasane HCl	Cl.C[N]1C(=NC2=CC(=CC=C12)N(CCCl)CCCl)CCCC(O)=O	3.988	2	0	9
S1213	Nelarabine	d9	L8000-01	in 10mM DMSO	DNA/RNA Synthesis	DNA Damage/DNA Repair	Nelarabine (506U78,Arranon) is a purine nucleoside analog and DNA synthesis inhibitor with IC50 from 0.067-2.15 μM in tumor cells.	297.27	121032-29-9	60	201.84	3	10.09	http://selleckchem.com/products/Arranon.html	C11H15N5O5	free base	506U78,Arranon	COC1=NC(=NC2=C1N=C[N]2C3OC(CO)C(O)C3O)N	-1.376	5	4	3
S1214	Bleomycin (NSC125066) sulfate	e9	L8000-01	in 10mM DMSO	Antineoplastic and Immunosuppressive Antibiotics,DNA/RNA Synthesis,Selection Antibiotics for Transfected Cell	DNA Damage/DNA Repair	Bleomycin Sulfate (Blenoxane,NSC125066) is a glycopeptide antibiotic and an anticancer agent for squamous cell carcinomas (SCC) with IC50 of 4 nM in UT-SCC-19A cells.	1512.62	9041-93-4	100	66	N/A	N/A	http://www.selleckchem.com/products/Bleomycin-sulfate.html	C55H85N17O25S4	Sulfate	Blenoxane,NSC125066	CC(O)C(NC(=O)C(C)C(O)C(C)NC(=O)C(NC(=O)C1=C(C)C(=NC(=N1)C(CC(N)=O)NCC(N)C(N)=O)N)C(OC2OC(CO)C(O)C(O)C2OC3OC(CO)C(O)C(OC(N)=O)C3O)C4=C[NH]C=N4)C(=O)NCCC5=NC(=CS5)C6=NC(=CS6)C(=O)NCCC[S+](C)C.O[S]([O-])(=O)=O	N/A	N/A	N/A	N/A
S1218	Clofarabine	f9	L8000-01	in 10mM DMSO	Apoptosis related,Autophagy,DNA/RNA Synthesis,RNR	DNA Damage/DNA Repair	Clofarabine (Clolar) inhibits the enzymatic activities of ribonucleotide reductase (RNR) (IC50 = 65 nM) and DNA polymerase. Clofarabine induces autophagy and apoptosis.	303.68	123318-82-1	60	197.58	<1	N/A	http://selleckchem.com/products/Clofarabine.html	C10H11ClFN5O3	free base	Clolar	NC1=C2N=C[N](C3OC(CO)C(O)C3F)C2=NC(=N1)Cl	-0.085	4	3	2
S1221	Dacarbazine (NSC-45388)	g9	L8000-01	in 10mM DMSO	Antineoplastic and Immunosuppressive Antibiotics,DNA/RNA Synthesis	DNA Damage/DNA Repair	Dacarbazine (NSC-45388, DTIC-Dome, Imidazole Carboxamide) is a triazene derivative with antineoplastic activity. Dacarbazine alkylates and cross-links DNA during all phases of the cell cycle, resulting in disruption of DNA function, cell cycle arrest, and apoptosis; used in the treatment of various cancers.	182.18	4342-03-4	12	65.87	2	10.98	http://selleckchem.com/products/Dacarbazine.html	C6H10N6O	free base	DTIC-Dome, Imidazole Carboxamide,NSC-45388	CN(C)N=NC1=C(N=C[NH]1)C(N)=O	-0.344	4	2	3
S1222	Dexrazoxane HCl (ICRF-187)	h9	L8000-01	in 10mM DMSO	Topoisomerase	DNA Damage/DNA Repair	Dexrazoxane HCl (ADR-529,Totect, ICRF-187, Zinecard, Cardioxane) is an intracellular iron chelator, which decreases the formation of superoxide radicals, used as a cardioprotective agent; also an inhibitor of topoisomerase II	304.73	149003-01-0	60	196.9	60	196.9	http://selleckchem.com/products/Dexrazoxane-Hydrochloride.html	C11H16N4O4.HCl	Hydrochloride	ADR-529,Totect, ICRF-187, Zinecard, Cardioxane	Cl.CC(CN1CC(=O)NC(=O)C1)N2CC(=O)NC(=O)C2	-1.722	4	2	3
S1223	Epirubicin (IMI 28) HCl	a10	L8000-01	in 10mM DMSO	Apoptosis related,Topoisomerase	DNA Damage/DNA Repair	Epirubicin HCl (Ellence, Pharmorubicin, Epirubicin Ebewe,IMI 28, NSC 256942, 4'-epidoxorubicin,Epirubicin hydrochloride), a semisynthetic L-arabino derivative of doxorubicin, is an antineoplastic agent by inhibiting Topoisomerase. Epirubicin induces apoptosis.	579.98	56390-09-1	100	172.42	100	172.42	http://selleckchem.com/products/Ellence.html	C27H29NO11.HCl	Hydrochloride	Ellence, Pharmorubicin, Epirubicin Ebewe,IMI 28, NSC 256942, 4'-epidoxorubicin,Epirubicin hydrochloride	Cl.COC1=C2C(=O)C3=C(C(=C4CC(O)(CC(OC5CC(N)C(O)C(C)O5)C4=C3O)C(=O)CO)O)C(=O)C2=CC=C1	0.338	6	5	5
S1225	Etoposide (VP-16)	b10	L8000-01	in 10mM DMSO	Antineoplastic and Immunosuppressive Antibiotics,Apoptosis related,Autophagy,Mitophagy,Topoisomerase	DNA Damage/DNA Repair	Etoposide (VP-16213,Vepesid,VP-16) is a semisynthetic derivative of podophyllotoxin, which inhibits DNA synthesis via topoisomerase II inhibition activity. Etoposide induces autophagy, mitophagy and apoptosis.	588.56	33419-42-0	100	169.91	<1	N/A	http://selleckchem.com/products/Etopophos.html	C29H32O13	free base	VP-16213,Vepesid,VP-16	COC1=CC(=CC(=C1O)OC)C2C3C(COC3=O)C(OC4OC5COC(C)OC5C(O)C4O)C6=C2C=C7OCOC7=C6	0.935	10	3	5
S1227	Raloxifene HCl	c10	L8000-01	in 10mM DMSO	Estrogen/progestogen Receptor	Endocrinology & Hormones	Raloxifene (LY156758, Keoxifene) HCl is a selective and orally active estrogen receptor modulator (SERM), which inhibits human cytosolic aldehyde oxidase-catalyzed phthalazine oxidation activity with IC50 of 5.7 nM.	510.04	82640-04-8	100	196.06	<1	N/A	http://selleckchem.com/products/Evista.html	C28H27NO4S.HCl	Hydrochloride	LY156758 (Keoxifene) HCl	Cl.OC1=CC=C(C=C1)C2=C(C(=O)C3=CC=C(OCCN4CCCCC4)C=C3)C5=C(S2)C=C(O)C=C5	6.843	2	2	7
S1229	Fludarabine Phosphate	d10	L8000-01	in 10mM DMSO	DNA/RNA Synthesis	DNA Damage/DNA Repair	Fludarabine Phosphate (F-ara-A, NSC 312887) is an analogue of adenosine and deoxyadenosine, which is able to compete with dATP for incorporation into DNA and inhibit DNA synthesis.	365.21	75607-67-9	73	199.88	2	5.48	http://selleckchem.com/products/Fludara.html	C10H13FN5O7P	Phosphate	F-ara-A (NSC 312887) Phosphate	NC1=NC(=NC2=C1N=C[N]2C3OC(CO[P](O)(O)=O)C(O)C3O)F	-1.384	5	3	4
S1231	Topotecan (NSC609699) HCl	e10	L8000-01	in 10mM DMSO	Apoptosis related,Autophagy,Topoisomerase	DNA Damage/DNA Repair	Topotecan HCl (Nogitecan HCl, SKFS 104864A,Hycamtin, NSC 609699) is a topoisomerase I inhibitor for MCF-7 Luc cells and DU-145 Luc cells with IC50 of 13 nM and 2 nM in cell-free assays, respectively. Topotecan HCl induces autophagy and apoptosis.	457.91	119413-54-6	91	198.73	91	198.73	http://selleckchem.com/products/Topotecan-Hydrochloride.html	C23H23N3O5.HCl	Hydrochloride	Nogitecan HCl, SKFS 104864A,Hycamtin, NSC 609699	Cl.CCC1(O)C(=O)OCC2=C1C=C3N(CC4=C3N=C5C=CC(=C(CN(C)C)C5=C4)O)C2=O	1.959	4	1	3
S1233	2-Methoxyestradiol (2-MeOE2)	f10	L8000-01	in 10mM DMSO	Apoptosis related,Autophagy,HIF,Microtubule Associated	Angiogenesis	2-Methoxyestradiol (2-MeOE2, NSC 659853, 2-ME2) depolymerizes microtubules and blocks HIF-1α nuclear accumulation and HIF-transcriptional activity. 2-Methoxyestradiol induces both autophagy and apoptosis in various carcinogenic cell lines.	302.41	362-07-2	60	198.41	<1	N/A	http://selleckchem.com/products/2-Methoxyestradiol(2ME2).html	C19H26O3	free base	NSC 659853, 2-ME2	COC1=C(O)C=C2CCC3C(CCC4(C)C(O)CCC34)C2=C1	3.821	1	2	1
S1235	Letrozole (CGS 20267)	g10	L8000-01	in 10mM DMSO	Aromatase,Autophagy	Endocrinology & Hormones	Letrozole (CGS 20267,Femara, Piroxicam) is a third generation inhibitor of aromatase with IC50 of 0.07-20 nM in cell-free assays.It has no effect on the plasma levels of 17α-OH progesterone, thyroid-stimulating hormone (TSH), luteinizing hormone (LH), follicle-stimulating hormone (FSH), or androstenedione and does not affect normal urine electrolyte excretion or thyroid function in clinical studi…	285.3	112809-51-5	57	199.79	<1	N/A	http://selleckchem.com/products/Letrozole.html	C17H11N5	free base	CGS 20267,Femara, Piroxicam	N#CC1=CC=C(C=C1)C([N]2C=NC=N2)C3=CC=C(C=C3)C#N	2.749	2	0	3
S1237	Temozolomide (CCRG 81045)	h10	L8000-01	in 10mM DMSO	Apoptosis related,Autophagy,DNA/RNA Synthesis	DNA Damage/DNA Repair	Temozolomide (NSC 362856,TMZ,CCRG 81045,Methazolastone,Temodar,Temodal) is a monofunctional SN-1 alkylating agent that can modify nitrogen atoms in the DNA ring and the extracyclic oxygen group, chemically converted to MTIC and degrades to methyldiazonium cation, which transfers methyl groups to DNA at physiologic pH. A DNA damage inducer in L-1210 and L-1210/BCNU cells. Temozolomide induces apop…	194.15	85622-93-1	38	195.72	<1	N/A	http://selleckchem.com/products/Methazolastone.html	C6H6N6O2	free base	NSC 362856,TMZ,CCRG 81045,Methazolastone,Temodar,Temodal	CN1N=NC2=C(N=C[N]2C1=O)C(N)=O	0.052	5	1	1
S1238	Tamoxifen (ICI 46474)	a11	L8000-01	in 10mM DMSO	Antineoplastic and Immunosuppressive Antibiotics,Apoptosis related,ATPase,Autophagy,Estrogen/progestogen Receptor,HSP (HSP90)	Angiogenesis	Tamoxifen (ICI 46474, (Z)-Tamoxifen, trans-Tamoxifen) is a selective estrogen receptor modulator (SERM). Tamoxifen enhances the Hsp90 molecular chaperone ATPase activity. Tamoxifen induces apoptosis.	371.51	10540-29-1	74	199.19	<1	N/A	http://selleckchem.com/products/Nolvadex.html	C26H29NO	Free Base	ICI 46474, (Z)-Tamoxifen, trans-Tamoxifen	CC/C(C1=CC=CC=C1)=C(C2=CC=CC=C2)/C3=CC=C(OCCN(C)C)C=C3.OC(=O)CC(O)(CC(O)=O)C(O)=O	1.966	4	0	13
S1241	Vincristine (NSC-67574) sulfate	b11	L8000-01	in 10mM DMSO	Antineoplastic and Immunosuppressive Antibiotics,Apoptosis related,Autophagy,Microtubule Associated	Cytoskeletal Signaling	Vincristine sulfate (NSC-67574, Leurocristine, Oncovin, 22-Oxovincaleukoblastine) is an inhibitor of polymerization of microtubules by binding to tubulin with IC50 of 32 μM in a cell-free assay. Vincristine sulfate induces apoptosis.	923.04	2068-78-2	100	108.34	60	65	http://selleckchem.com/products/Vincristine-Sulfate.html	C46H58N4O14S	free base	Leurocristine, Oncovin, NSC-67574, 22-Oxovincaleukoblastine	CCC1(O)CC2CN(CCC3=C([NH]C4=C3C=CC=C4)C(C2)(C(=O)OC)C5=CC6=C(C=C5OC)N(C=O)C7C(O)(C(OC(C)=O)C8(CC)C=CCN9CCC67C89)C(=O)OC)C1.O[S](O)(=O)=O	3.365	8	1	10
S1243	Agomelatine (S20098)	c11	L8000-01	in 10mM DMSO	5-HT Receptor	Neuronal Signaling	Agomelatine (Valdoxan, Melitor, Thymanax,S20098) is classified as a norepinephrine-dopamine disinhibitor (NDDI) due to its antagonism of the 5-HT2C receptor.	243.3	138112-76-2	48	197.29	<1	N/A	http://selleckchem.com/products/Agomelatine.html	C15H17NO2	free base	Valdoxan, Melitor, Thymanax,S20098	COC1=CC2=C(CCNC(C)=O)C=CC=C2C=C1	2.17	2	1	4
S1245	Latrepirdine 2HCl	d11	L8000-01	in 10mM DMSO	5-HT Receptor,GluR,Histamine Receptor	Neuronal Signaling	Latrepirdine is an orally active,and neuroactive antagonist of multiple drug targets, including histamine receptors, GluR, and 5-HT receptors, used as an antihistamine drug.	392.37	97657-92-6	24	61.17	<1	N/A	http://selleckchem.com/products/Dimebon.html	C21H25N3.2HCl	Dihydrochloride	N/A	Cl.Cl.CN1CCC2=C(C1)C3=C(C=CC(=C3)C)[N]2CCC4=CC=C(C)N=C4	4.769	1	0	3
S1247	Leflunomide (HWA486)	e11	L8000-01	in 10mM DMSO	AhR,Dehydrogenase	Metabolism	Leflunomide (HWA486, RS-34821, SU101, Arava) is a pyrimidine synthesis and protein tyrosine kinase inhibitor belonging to the DMARD, used as an immunosuppressant agent. The active metabolite of Leflunomide is A77 1726, which inhibits dihydroorotate dehydrogenase (DHODH). Leflunomide is also an agonist of the AhR.	270.21	75706-12-6	54	199.84	<1	N/A	http://selleckchem.com/products/Leflunomide.html	C12H9F3N2O2	free base	HWA486, RS-34821, SU101, Arava	CC1=C(C=NO1)C(=O)NC2=CC=C(C=C2)C(F)(F)F	2.156	3	1	3
S1250	Enzalutamide (MDV3100)	f11	L8000-01	in 10mM DMSO	Androgen Receptor,Autophagy	Endocrinology & Hormones	Enzalutamide (MDV3100) is an androgen-receptor (AR) antagonist with IC50 of 36 nM in LNCaP cells. Enzalutamide is shown to increase autophagy.	464.44	915087-33-1	92	198.09	<1	N/A	http://selleckchem.com/products/MDV3100.html	C21H16F4N4O2S	free base	MDV3100	CNC(=O)C1=C(F)C=C(C=C1)N2C(=S)N(C(=O)C2(C)C)C3=CC=C(C#N)C(=C3)C(F)(F)F	4.954	2	1	4
S1251	Dienogest	g11	L8000-01	in 10mM DMSO	Estrogen/progestogen Receptor	Endocrinology & Hormones	Dienogest (STS 557) is an orally active synthetic progesterone, used for contraception and the treatment of endometriosis.	311.42	65928-58-7	62	199.09	<1	N/A	http://selleckchem.com/products/Dienogest.html	C20H25NO2	free base	STS 557	CC12CCC3=C4CCC(=O)C=C4CCC3C1CCC2(O)CC#N	3.046	1	0	1
S1255	Nepafenac	h11	L8000-01	in 10mM DMSO	COX	Neuronal Signaling	Nepafenac (AHR 9434, AL 6515) is a prodrug of amfenac that acts as an inhibitor of COX-1 and COX-2 activity, used in the treatment of pain and inflammation associated with cataract surgery.	254.28	78281-72-8	50	196.63	<1	N/A	http://selleckchem.com/products/Nepafenac.html	C15H14N2O2	free base	AHR 9434, AL 6515	NC(=O)CC1=CC=CC(=C1N)C(=O)C2=CC=CC=C2	1.524	2	2	4
S1257	Posaconazole (SCH 56592)	a2	L8000-02	in 10mM DMSO	P450 (e.g. CYP17)	Metabolism	Posaconazole (SCH 56592,POS,Noxafil) is an inhibitor primarily of CYP3A4, but it does not inhibit the activity of other CYP enzymes; Also an inhibitor of sterol C14ɑ demethylase inhibitor with IC50 of 0.25 μM. Posaconazole has a median terminal elimination half-life of 15-35 hours.	700.78	171228-49-2	100	142.7	<1	N/A	http://selleckchem.com/products/Posaconazole.html	C37H42F2N8O4	free base	SCH 56592,POS,Noxafil	CCC(C(C)O)N1N=CN(C1=O)C2=CC=C(C=C2)N3CCN(CC3)C4=CC=C(OCC5COC(C5)(C[N]6C=NC=N6)C7=CC=C(F)C=C7F)C=C4	5.096	6	1	12
S1259	Ramelteon	b2	L8000-02	in 10mM DMSO	MT Receptor	GPCR & G Protein	Ramelteon (TAK-375) is a novel melatonin receptor agonist for human MT1 and MT2 receptors and chick forebrain melatonin receptors with Ki of 14 pM, 112 pM and 23.1 pM, respectively.	259.34	196597-26-9	52	200.51	<1	N/A	http://selleckchem.com/products/Ramelteon.html	C16H21NO2	free base	TAK-375	CCC(=O)NCCC1CCC2=CC=C3OCCC3=C12	2.826	2	1	4
S1260	Cinacalcet (AMG-073) HCl	c2	L8000-02	in 10mM DMSO	CaSR	GPCR & G Protein	Cinacalcet (Mimpara, Sensipar,AMG-073) HCl represents a new class of compounds for the treatment of hyperparathyroidism.	393.87	364782-34-3	79	200.57	<1	N/A	http://selleckchem.com/products/Cinacalcet-hydrochloride.html	C22H22F3N.HCl	Hydrochloride	Mimpara, Sensipar,AMG-073	Cl.CC(NCCCC1=CC(=CC=C1)C(F)(F)F)C2=CC=CC3=C2C=CC=C3	6.338	0	1	7
S1261	Celecoxib (SC 58635)	d2	L8000-02	in 10mM DMSO	COX	Neuronal Signaling	Celecoxib (Celebrex, Celebra,SC 58635) is a selective COX-2 inhibitor with IC50 of 40 nM in Sf9 cells.	381.37	169590-42-5	76	199.28	<1	N/A	http://selleckchem.com/products/Celecoxib.html	C17H14F3N3O2S	free base	Celebrex, Celebra,SC 58635	CC1=CC=C(C=C1)C2=CC(=N[N]2C3=CC=C(C=C3)[S](N)(=O)=O)C(F)(F)F	4.428	3	1	4
S1267	Vemurafenib (PLX4032)	e2	L8000-02	in 10mM DMSO	Autophagy,Raf	MAPK	Vemurafenib (PLX4032, RG7204, RO5185426) is a novel and potent inhibitor of B-RafV600E with IC50 of 31 nM in cell-free assay. 10-fold selective for B-RafV600E over wild-type B-Raf in enzymatic assays and the cellular selectivity can exceed 100-fold. Vemurafenib (PLX4032, RG7204) induces autophagy.	489.92	918504-65-1	97	197.99	<1	N/A	http://selleckchem.com/products/PLX-4032.html	C23H18ClF2N3O3S	free base	RG7204, RO5185426,PLX4032	CCC[S](=O)(=O)NC1=CC=C(F)C(=C1F)C(=O)C2=C[NH]C3=NC=C(C=C23)C4=CC=C(Cl)C=C4	4.953	4	2	7
S1271	Acarbose	f2	L8000-02	in 10mM DMSO	Carbohydrate Metabolism	Metabolism	Acarbose(BAY g 5421,Prandase, Precose, Glucobay, Bay-g 5421) is an inhibitor of intestinal alpha-glucosidase, used to treat type 2 diabetes mellitus.	645.6	56180-94-0	100	154.89	100	154.89	http://selleckchem.com/products/Acarbose.html	C25H43NO18	free base	BAY g 5421,Prandase, Precose, Glucobay, Bay-g 5421	CC1OC(OC2C(O)C(O)C(OC2CO)OC3C(O)C(O)C(O)OC3CO)C(O)C(O)C1NC4C=C(CO)C(O)C(O)C4O	-6.839	5	13	9
S1276	Adapalene	g2	L8000-02	in 10mM DMSO	Retinoid Receptor	Metabolism	Adapalene (CD-271) is a dual RAR and RXR agonist, used in the treatment of acne.	412.52	106685-40-9	8	19.39	<1	N/A	http://selleckchem.com/products/Adapalene.html	C28H28O3	free base	CD-271	COC1=C(C=C(C=C1)C2=CC3=C(C=C2)C=C(C=C3)C(O)=O)[C]45CC6[CH2][CH](C[CH]([CH2]6)C4)C5	6.279	2	0	4
S1278	Altretamine	h2	L8000-02	in 10mM DMSO	DNA alkylator	DNA Damage/DNA Repair	Altretamine (Hexamethylmelamine, NSC13875, ENT50852) is an anti-neoplastic agent.	210.28	645-05-6	15	71.33	<1	N/A	http://selleckchem.com/products/Altretamine.html	C9H18N6	free base	Hexamethylmelamine, NSC13875, ENT50852	CN(C)C1=NC(=NC(=N1)N(C)C)N(C)C	1.995	3	0	3
S1280	Amisulpride	a3	L8000-02	in 10mM DMSO	Dopamine Receptor	Neuronal Signaling	Amisulpride (DAN-2163) is an atypical antipsychotic used to treat psychosis in schizophrenia and episodes of mania in bipolar disorder.	369.48	71675-85-9	73	197.57	<1	N/A	http://selleckchem.com/products/Amisulpride.html	C17H27N3O4S	free base	DAN-2163	CCN1CCCC1CNC(=O)C2=CC(=C(N)C=C2OC)[S](=O)(=O)CC	1.127	4	2	7
S1281	Aniracetam	b3	L8000-02	in 10mM DMSO	AMPA Receptor-kainate Receptor-NMDA Receptor	Neuronal Signaling	Aniracetam (RO 13-5057) is a nootropics and neuroprotective drug.	219.24	72432-10-1	44	200.69	<1	N/A	http://selleckchem.com/products/Aniracetam.html	C12H13NO3	free base	RO 13-5057	COC1=CC=C(C=C1)C(=O)N2CCCC2=O	1.267	3	0	2
S1282	Artemisinin	c3	L8000-02	in 10mM DMSO	ADC Cytotoxin,Anti-infection	Microbiology	Artemisinin (Qinghaosu,Artemisinine,Coartem,NSC 369397) is a sesquiterpene endoperoxide which is a potent antimalarial agent.	282.33	63968-64-9	57	201.89	<1	N/A	http://selleckchem.com/products/Artemisinin.html	C15H22O5	free base	Qinghaosu,Artemisinine,Coartem,NSC 369397	CC1CCC2C(C)C(=O)OC3OC4(C)CCC1C23OO4	1.998	5	0	0
S1283	Asenapine maleate	d3	L8000-02	in 10mM DMSO	5-HT Receptor,Adrenergic Receptor	Neuronal Signaling	Asenapine maleate (Org 5222) is a high-affinity antagonist of serotonin, norepinephrine, dopamine and histamine receptors, used for the treatment of schizophrenia and acute mania associated with bipolar disorder.	401.84	85650-56-2	80	199.08	<1	N/A	http://selleckchem.com/products/Asenapine.html	C17H16ClNO.C4H4O4	Maleate	Org 5222	CN1CC2C(C1)C3=C(OC4=C2C=CC=C4)C=CC(=C3)Cl.OC(=O)\C=C/C(O)=O	0.883	3	0	2
S1284	Benazepril HCl	e3	L8000-02	in 10mM DMSO	RAAS	Endocrinology & Hormones	Benazepril HCl (CGS 14824A) is a novel angiotensin I converting enzyme inhibitor, used primarily in treatment of hypertension.	460.95	86541-74-4	92	199.59	19	41.22	http://selleckchem.com/products/Benazepril-hydrochloride.html	C24H28N2O5.HCl	Hydrochloride	CGS 14824A HCl	Cl.CCOC(=O)C(CCC1=CC=CC=C1)NC2CCC3=C(C=CC=C3)N(CC(O)=O)C2=O	1.003	4	1	10
S1287	Bumetanide	f3	L8000-02	in 10mM DMSO	NKCC	Transmembrane Transporters	Bumetanide (Bumex) is a loop diuretic of the sulfamyl category to treat heart failure. Bumetanide is a selective Na+-K+-Cl- cotransporter 1 (NKCC1) inhibitor, weakly inhibits NKCC2, with IC50s of 0.68 and 4.0 μM for hNKCC1A and hNKCC2A, respectively.	364.42	28395-03-1	73	200.32	<1	N/A	http://selleckchem.com/products/Bumetanide.html	C17H20N2O5S	free base	N/A	CCCCNC1=C(OC2=CC=CC=C2)C(=CC(=C1)C(O)=O)[S](N)(=O)=O	2.862	4	2	8
S1289	Carmofur	g3	L8000-02	in 10mM DMSO	COVID-19,DNA/RNA Synthesis	DNA Damage/DNA Repair	Carmofur (HCFU) is a highly potent acid ceramidase inhibitor, used in the treatment of breast and colorectal cancer.	257.26	61422-45-5	52	202.13	<1	N/A	http://selleckchem.com/products/Carmofur.html	C11H16FN3O3	free base	HCFU	CCCCCCNC(=O)N1C=C(F)C(=O)NC1=O	1.125	3	2	5
S1291	Cetirizine DiHCl	h3	L8000-02	in 10mM DMSO	Histamine Receptor	Neuronal Signaling	Cetirizine DiHCl (Zyrtec, Reactine,UCB P071) is an antihistamine.	461.81	83881-52-1	92	199.22	92	199.22	http://selleckchem.com/products/Cetirizine-Dihydrochloride.html	C21H25ClN2O3.2HCl	Dihydrochloride	Zyrtec, Reactine,UCB P071	Cl.Cl.OC(=O)COCCN1CCN(CC1)C(C2=CC=CC=C2)C3=CC=C(Cl)C=C3	1.217	2	0	8
S1294	Cilostazol (OPC-13013)	a4	L8000-02	in 10mM DMSO	PDE	Metabolism	Cilostazol (Pletal,OPC-13013) is a potent cyclic nucleotide phosphodiesterase type 3 (PDE3) inhibitor with IC50 of 0.2 μM and inhibitor of adenosine uptake.	369.46	73963-72-1	74	200.29	<1	N/A	http://selleckchem.com/products/Cilostazol.html	C20H27N5O2	free base	Pletal,OPC-13013	O=C1CCC2=C(N1)C=CC(=C2)OCCCCC3=NN=N[N]3C4CCCCC4	3.23	5	1	7
S1299	Floxuridine (NSC 27640)	b4	L8000-02	in 10mM DMSO	Apoptosis related,CMV,DNA/RNA Synthesis	DNA Damage/DNA Repair	Floxuridine (NSC 27640, Deoxyfluorouridine, FUDR) is a prodrug that is rapidly catabolized to 5-fluorouracil in vivo. Floxuridine is used to treat various cancers, particularly metastases to the liver. Floxuridine inhibits Poly(ADP-Ribose) polymerase and induces DNA damage and apoptosis. Floxuridine has antiviral effects against HSV and CMV.	246.19	50-91-9	49	199.03	49	199.03	http://selleckchem.com/products/Floxuridine.html	C9H11FN2O5	free base	Deoxyfluorouridine, FUDR,NSC 27640	OCC1OC(CC1O)N2C=C(F)C(=O)NC2=O	-1.775	3	3	2
S1300	Tegafur (FT-207)	c4	L8000-02	in 10mM DMSO	DNA/RNA Synthesis	DNA Damage/DNA Repair	Tegafur (NSC 148958,Fluorafur,FT-207) is a substance being used in the treatment of some types of cancer.	200.17	17902-23-7	40	199.83	8	39.97	http://selleckchem.com/products/Ftorafur.html	C8H9FN2O3	free base	NSC 148958,Fluorafur,FT-207	FC1=CN(C2CCCO2)C(=O)NC1=O	-0.625	3	1	1
S1302	Ifosfamide (NSC109724)	d4	L8000-02	in 10mM DMSO	DNA alkylator,DNA/RNA Synthesis	DNA Damage/DNA Repair	Ifosfamide (Mitoxana, Ifex,Isophosphamide,NSC109724) is a nitrogen mustard alkylating agent used in the treatment of cancer.	261.09	3778-73-2	52	199.17	52	199.17	http://selleckchem.com/products/Ifosfamide.html	C7H15Cl2N2O2P	free base	Mitoxana, Ifex,Isophosphamide,NSC109724	ClCCN[P]1(=O)OCCCN1CCCl	0.144	2	1	5
S1304	Megestrol Acetate	e4	L8000-02	in 10mM DMSO	Androgen Receptor,Estrogen/progestogen Receptor	Endocrinology & Hormones	Megestrol acetate (BDH1298, SC10363) is a synthetic progestogen, used to treat breast cancer and loss of appetite.	384.51	595-33-5	33	85.82	<1	N/A	http://selleckchem.com/products/Megestrol-Acetate.html	C24H32O4	free base	BDH1298, SC10363	CC(=O)OC1(CCC2C3C=C(C)C4=CC(=O)CCC4(C)C3CCC12C)C(C)=O	3.505	4	0	3
S1305	Mercaptopurine (6-MP)	f4	L8000-02	in 10mM DMSO	DNA/RNA Synthesis	DNA Damage/DNA Repair	Mercaptopurine(6-MP) is a widely used antileukemic agent and immunosuppressive drug that inhibits de novo purine synthesis through incorporation of thiopurine methyltransferase metabolites into DNA and RNA.	152.18	50-44-2	30	197.13	<1	N/A	http://selleckchem.com/products/Mercaptopurine.html	C5H4N4S	free base	6-MP	S=C1N=CNC2=C1[NH]C=N2	0.367	2	2	0
S1319	Costunolide	h4	L8000-02	in 10mM DMSO	Telomerase	DNA Damage/DNA Repair	Costunolide (NSC 106404), a natural sesquiterpene compound with multiple biological activities; inhibits FPTase with IC50 of 20 μM, also inhibits telomerase with IC50 of 65-90 μM.	232.32	553-21-9	47	202.31	<1	N/A	http://selleckchem.com/products/Costunolide.html	C15H20O2	free base	NSC 106404	CC/1=C\CC\C(=C\C2OC(=O)C(=C)C2CC1)C	4.022	2	0	0
S1322	Dexamethasone (MK-125)	a5	L8000-02	in 10mM DMSO	Autophagy,Complement System,COVID-19,Glucocorticoid Receptor,IL Receptor,Mitophagy	Immunology & Inflammation	Dexamethasone (MK-125, NSC 34521, Hexadecadrol, Prednisolone F) is a potent synthetic member of the glucocorticoid class of steroid drugs, and an interleukin receptor modulator that has anti-inflammatory and immunosuppressant effects. Dexamethasone induces autophagy and mitophagy. Dexamethasone is tested in hospitalized patients with COVID-19 and is found to have benefits for critically ill patie…	392.46	50-02-2	79	201.29	<1	N/A	http://selleckchem.com/products/Dexamethasone.html	C22H29FO5	free base	NSC 34521, Hexadecadrol, Prednisolone F,MK-125	CC1CC2C3CCC4=CC(=O)C=CC4(C)C3(F)C(O)CC2(C)C1(O)C(=O)CO	1.708	2	2	2
S1324	Doxazosin Mesylate	b5	L8000-02	in 10mM DMSO	Adrenergic Receptor	Neuronal Signaling	Doxazosin, a quinazoline-derivative, selectively antagonizes postsynaptic α1-adrenergic receptors, used in the treatment of high blood pressure and urinary retention associated with benign prostatic hyperplasia.	547.58	77883-43-3	15	27.39	<1	N/A	http://selleckchem.com/products/Doxazosin-mesylate.html	C23H25N5O5.CH4O3S	Mesylate	N/A	COC1=C(OC)C=C2C(=NC(=NC2=C1)N3CCN(CC3)C(=O)C4COC5=C(O4)C=CC=C5)N.C[S](O)(=O)=O	2.071	7	1	4
S1326	Edaravone	c5	L8000-02	in 10mM DMSO	Antioxidant	ER stress & UPR	Edaravone (MCI-186) is a novel potent free radical scavenger that has been clinically used to reduce the neuronal damage following ischemic stroke.	174.2	89-25-8	35	200.92	<1	N/A	http://selleckchem.com/products/Edaravone.html	C10H10N2O	free base	MCI-186	CC1=NN(C(=O)C1)C2=CC=CC=C2	1.123	2	0	1
S1328	Etodolac	d5	L8000-02	in 10mM DMSO	COX	Neuronal Signaling	Etodolac(AY-24236) is a nonsteroidal anti-inflammatory drug (NSAID) and a COX inhibitor, used for the treatment of inflammation and pain.	287.35	41340-25-4	58	201.84	<1	N/A	http://selleckchem.com/products/Etodolac.html	C17H21NO3	free base	AY-24236	CCC1=CC=CC2=C1[NH]C3=C2CCOC3(CC)CC(O)=O	3.723	2	1	4
S1330	Felbamate	f5	L8000-02	in 10mM DMSO	NMDAR	Neuronal Signaling	Felbamate (Felbatol, ADD-03055,W-554) is an anticonvulsant drug used in the treatment of epilepsy; NMDAR antagonist.	238.24	25451-15-4	48	201.48	<1	N/A	http://selleckchem.com/products/Felbamate.html	C11H14N2O4	free base	Felbatol, ADD-03055,W-554	NC(=O)OCC(COC(N)=O)C1=CC=CC=C1	0.984	4	2	7
S1331	Fluconazole (UK 49858)	g5	L8000-02	in 10mM DMSO	Fungal,P450 (e.g. CYP17)	Metabolism	Fluconazole (Diflucan, Trican, Alfumet,UK 49858) is a fungal lanosterol 14 alpha-demethylase inhibitor, which thereby prevents the formation of ergosterol,used in the treatment and prevention of superficial and systemic fungal infections.	306.27	86386-73-4	61	199.17	<1	N/A	http://selleckchem.com/products/Fluconazole.html	C13H12F2N6O	free base	Diflucan, Trican, Alfumet,UK 49858	OC(C[N]1C=NC=N1)(C[N]2C=NC=N2)C3=C(F)C=C(F)C=C3	0.75	4	0	5
S1332	Flumazenil (RO 15-1788)	h5	L8000-02	in 10mM DMSO	GABA Receptor	Neuronal Signaling	Flumazenil (RO 15-1788) is a competitive GABAA receptor antagonist, used in the treatment of benzodiazepine overdoses.	303.29	78755-81-4	5	16.49	<1	N/A	http://selleckchem.com/products/Flumazenil.html	C15H14FN3O3	free base	RO 15-1788	CCOC(=O)C1=C2CN(C)C(=O)C3=CC(=CC=C3[N]2C=N1)F	1.583	4	0	3
S1333	Fluoxetine (Lilly 110140) HCl	a6	L8000-02	in 10mM DMSO	5-HT Receptor	Neuronal Signaling	Fluoxetine HCl (Prozac, Sarafem,LY-110140) is a selective serotonin-reuptake inhibitor (SSRI) at the neuronal membrane, used in the treatment of depression.	345.79	56296-78-7	69	199.54	4	11.57	http://selleckchem.com/products/Fluoxetine-hydrochloride.html	C17H18F3NO.HCl	Hydrochloride	Prozac, Sarafem,LY-110140	Cl.CNCCC(OC1=CC=C(C=C1)C(F)(F)F)C2=CC=CC=C2	4.415	1	1	7
S1334	Flupirtine maleate	b6	L8000-02	in 10mM DMSO	DNA/RNA Synthesis	DNA Damage/DNA Repair	Flupirtine maleate is the salt form of Flupirtine, which is a centrally acting non-opioid analgesia, is a selective neuronal potassium channel opener that also has NMDA receptor antagonist properties.	420.39	75507-68-5	84	199.81	<1	N/A	http://selleckchem.com/products/Flupirtine-maleate.html	C15H17FN4O2.C4H4O4	Maleate	N/A	CCOC(=O)NC1=C(N)N=C(NCC2=CC=C(F)C=C2)C=C1.OC(=O)\C=C\C(O)=O	2.76	5	3	8
S1336	Fluvoxamine (DU-23000) maleate	c6	L8000-02	in 10mM DMSO	Serotonin Transporter	Neuronal Signaling	Fluvoxamine maleate (DU-23000, MK-264) is a selective serotonin (5-HT) reuptake inhibitor (SSRI), used in the treatment of obsessive-compulsive disorder.	434.41	61718-82-9	87	200.27	<1	N/A	http://selleckchem.com/products/Fluvoxamine-maleate.html	C19H25F3N2O6	Maleate	MK-264,DU-23000 maleate	COCCCCC(=N\OCCN)/C1=CC=C(C=C1)C(F)(F)F.OC(=O)\C=C/C(O)=O	0.111	5	1	12
S1340	Gatifloxacin	d6	L8000-02	in 10mM DMSO	Topoisomerase	DNA Damage/DNA Repair	Gatifloxacin (AM-1155, CG5501, BMS-206584) is an antibiotic of the fourth-generation fluoroquinolone family, and inhibits the bacterial enzymes DNA gyrase and topoisomerase IV.	375.39	112811-59-3	7	18.65	<1	N/A	http://selleckchem.com/products/Gatifloxacin.html	C19H22FN3O4	free base	AM-1155, CG5501, BMS-206584	COC1=C2N(C=C(C(O)=O)C(=O)C2=CC(=C1N3CCNC(C)C3)F)C4CC4	-0.909	3	1	4
S1342	Genistein (NPI 031L)	e6	L8000-02	in 10mM DMSO	EGFR,Topoisomerase	Protein Tyrosine Kinase	Genistein (NPI 031L), a phytoestrogen found in soy products, is a highly specific inhibitor of protein tyrosine kinase (PTK) which blocks the mitogenic effect mediated by EGF on NIH-3T3 cells with IC50 of 12μM or by insulin with IC50 of 19 μM.	270.24	446-72-0	54	199.82	<1	N/A	http://selleckchem.com/products/Genistein.html	C15H10O5	free base	NPI 031L	OC1=CC=C(C=C1)C2=COC3=C(C(=CC(=C3)O)O)C2=O	2.14	2	3	1
S1344	Glimepiride	f6	L8000-02	in 10mM DMSO	Potassium Channel	Transmembrane Transporters	Glimepiride(HOE-490) is a potent Kir6.2/SUR inhibitor with IC50 of 3.0 nM, 5.4 nM, and 7.3 nM for SUR1, SUR2A and SUR2B, used in the treatment of type 2 diabetes mellitus.	490.62	93479-97-1	11	22.42	<1	N/A	http://selleckchem.com/products/Glimepiride.html	C24H34N4O5S	free base	HOE-490	CCC1=C(C)CN(C(=O)NCCC2=CC=C(C=C2)[S](=O)(=O)NC(=O)NC3CCC(C)CC3)C1=O	3.781	5	3	7
S1351	Ivermectin (MK-933)	g6	L8000-02	in 10mM DMSO	AChR,Autophagy,Chloride Channel,COVID-19,HIV,Mitophagy,P2 Receptor	Transmembrane Transporters	Ivermectin (MK-933, IVM) is a glutamate-gated chloride channel (GluCls) activator, used as a broad-spectrum antiparasitic drug. Ivermectin (MK-933, IVM) is a specific positive allosteric effector of P2X4 and α7 nicotinic acetylcholine receptors (nAChRs). Ivermectin has potent antiviral activity towards both HIV-1 and dengue virus. Ivermectin induces autophagy through the AKT/mTOR signaling pathwa…	875.09	70288-86-7	100	114.27	<1	N/A	http://selleckchem.com/products/Ivermectin.html	C48H74O14	Free Base	MK-933	CCC(C)C1OC2(CCC1C)CC3CC(C\C=C(C)\C(OC4CC(OC)C(OC5CC(OC)C(O)C(C)O5)C(C)O4)C(C)\C=C\C=C\6COC7C(O)C(=CC(C(=O)O3)C67O)C)O2	4.743	11	2	8
S1354	Lansoprazole	h6	L8000-02	in 10mM DMSO	ATPase,Proton Pump	Transmembrane Transporters	Lansoprazole (A-65006, AG-1749) is a proton-pump inhibitor (PPI) that binds covalently to parietal cell H(+),K(+)-ATPase. Lansoprazole prevents the stomach from producing gastric acid.	369.36	103577-45-3	74	200.35	<1	N/A	http://selleckchem.com/products/Lansoprazole.html	C16H14F3N3O2S	free base	A-65006, AG-1749	CC1=C(OCC(F)(F)F)C=CN=C1C[S](=O)C2=NC3=CC=CC=C3[NH]2	3.442	4	1	6
S1357	Lidocaine	a7	L8000-02	in 10mM DMSO	Histamine Receptor	Neuronal Signaling	Lidocaine (Alphacaine) is a selective inverse peripheral histamine H1-receptor agonist with an IC50 of >32 μM.	234.34	137-58-6	47	200.56	9	38.41	http://selleckchem.com/products/Lidocaine.html	C14H22N2O	Free Base	Alphacaine	CCN(CC)CC(=O)NC1=C(C)C=CC=C1C	2.626	1	1	5
S1358	Loratadine (SCH29851)	b7	L8000-02	in 10mM DMSO	Histamine Receptor	Neuronal Signaling	Loratadine (Alavert,Claritin,SCH29851) is a histamine H1 receptor antagonist, used to treat allergies. Also acts as a selective inhibitor of B(0)AT2 with IC50 of 4 μM.	382.88	79794-75-5	17	44.4	<1	N/A	http://selleckchem.com/products/Loratadine.html	C22H23ClN2O2	free base	Alavert,Claritin,SCH29851	CCOC(=O)N1CCC(CC1)=C2C3=C(CCC4=C2N=CC=C4)C=C(Cl)C=C3	5	3	0	2
S1359	Losartan Potassium (DuP 753)	c7	L8000-02	in 10mM DMSO	Angiotensin Receptor	GPCR & G Protein	Losartan Potassium (DuP 753, MK 954) is an angiotensin II receptor antagonist, competes with the binding of angiotensin II to AT1 receptors with IC50 of 20 nM.	462.01	124750-99-8	92	199.13	92	199.13	http://selleckchem.com/products/losartan-potassium.html	C22H23ClKN6O	Potassium salt	MK 954,DuP 753	[KH].CCCCC1=NC(=C(CO)[N]1CC2=CC=C(C=C2)C3=C(C=CC=C3)C4=NN=N[NH]4)Cl	4.241	4	2	8
S1367	Amonafide	d7	L8000-02	in 10mM DMSO	Topoisomerase	DNA Damage/DNA Repair	Amonafide (NSC308847, AS1413) produces protein-associated DNA-strand breaks through a topoisomerase II-mediated reaction, but does not produce topoisomerase I-mediated DNA cleavage. Phase 3.	283.33	69408-81-7	57	201.18	<1	N/A	http://selleckchem.com/products/Amonafide.html	C16H17N3O2	free base	NSC308847,AS1413	CN(C)CCN1C(=O)C2=C3C(=CC=C2)C=C(N)C=C3C1=O	1.162	2	1	3
S1368	Acitretin	e7	L8000-02	in 10mM DMSO	Retinoid Receptor	Metabolism	Acitretin (Etretin, RO 10-1670) is a second generation retinoid used for psoriasis.	326.43	55079-83-9	20	61.27	<1	N/A	http://selleckchem.com/products/Acitretin.html	C21H26O3	free base	Etretin, RO 10-1670	COC1=CC(=C(\C=C\C(C)=C\C=C\C(C)=C\C(O)=O)C(=C1C)C)C	5.665	2	0	6
S1373	Daptomycin (LY146032)	f7	L8000-02	in 10mM DMSO	Antibiotics,Antibiotics for Mammalian Cell Culture,Bacterial,DNA/RNA Synthesis	DNA Damage/DNA Repair	Daptomycin (Cubicin,LY146032) is a novel antibiotic with rapid in vitro bactericidal activity against gram-positive organisms.	1620.67	103060-53-3	100	61.7	100	61.7	http://selleckchem.com/products/Daptomycin.html	C72H101N17O26	free base	Cubicin,LY146032	CCCCCCCCCC(=O)NC(CC1=C[NH]C2=C1C=CC=C2)C(=O)NC(CC(N)=O)C(=O)NC(CC(O)=O)C(=O)NC3C(C)OC(=O)C(CC(=O)C4=CC=CC=C4N)NC(=O)C(NC(=O)C(CO)NC(=O)CNC(=O)C(CC(O)=O)NC(=O)C(C)NC(=O)C(CC(O)=O)NC(=O)C(CCCN)NC(=O)CNC3=O)C(C)CC(O)=O	-7.895	21	18	35
S1376	Gestodene	g7	L8000-02	in 10mM DMSO	Estrogen/progestogen Receptor	Endocrinology & Hormones	Gestodene (SH B 331,WL 70) is a progestogen hormonal contraceptive.	310.43	60282-87-3	62	199.72	<1	N/A	http://selleckchem.com/products/Gestodene.html	C21H26O2	free base	SH B 331,WL 70	CCC12CCC3C(CCC4=CC(=O)CCC34)C1C=CC2(O)C#C	4.462	1	0	1
S1377	Drospirenone	h7	L8000-02	in 10mM DMSO	Estrogen/progestogen Receptor	Endocrinology & Hormones	Drospirenone (ZK 3059) is a synthetic progestin that is an analog to spironolactone.	366.49	67392-87-4	73	199.19	<1	N/A	http://selleckchem.com/products/Drospirenone.html	C24H30O3	free base	ZK 3059	CC12CCC(=O)C=C1C3CC3C4C2CCC5(C)C4C6CC6C57CCC(=O)O7	3.383	3	0	0
S1378	Ruxolitinib (INCB018424)	a8	L8000-02	in 10mM DMSO	Apoptosis related,Autophagy,JAK,Mitophagy	JAK/STAT	Ruxolitinib (INCB018424) is the first potent, selective, JAK1/2 inhibitor to enter the clinic with IC50 of 3.3 nM/2.8 nM in cell-free assays, >130-fold selectivity for JAK1/2 versus JAK3. Ruxolitinib kills tumor cells through toxic mitophagy. Ruxolitinib induces autophagy and enhances apoptosis.	306.37	941678-49-5	61	199.11	<1	N/A	http://selleckchem.com/products/INCB18424.html	C17H18N6	free base	INCB018424	N#CCC(C1CCCC1)[N]2C=C(C=N2)C3=NC=NC4=C3C=C[NH]4	2.88	3	1	4
S1379	Isotretinoin	b8	L8000-02	in 10mM DMSO	Hydroxylase	Metabolism	Isotretinoin (13-cis retinoic acid) was developed to be used as a chemotherapy medication for the treatment of brain cancer, pancreatic cancer and more.	300.44	4759-48-2	60	199.71	<1	N/A	http://selleckchem.com/products/Isotretinoin.html	C20H28O2	free base	13-cis retinoic acid	CC1=C(\C=C\C(C)=C\C=C\C(C)=C/C(O)=O)C(C)(C)CCC1	5.551	1	0	5
S1385	Mosapride Citrate	c8	L8000-02	in 10mM DMSO	5-HT Receptor	Neuronal Signaling	Mosapride Citrate (TAK-370, AS-4370, Gasmotin) is a gastroprokinetic agent that acts as a selective 5HT4 agonist.	614.02	112885-42-4	90	146.58	<1	N/A	http://selleckchem.com/products/Mosapride-citrate.html	C21H25ClFN3O3.C6H8O7	Citrate	TAK-370, AS-4370, Gasmotin	CCOC1=CC(=C(Cl)C=C1C(=O)NCC2CN(CCO2)CC3=CC=C(F)C=C3)N.OC(=O)CC(O)(CC(O)=O)C(O)=O	-1.422	6	2	12
S1386	Nafamostat mesilate (FUT-175)	d8	L8000-02	in 10mM DMSO	Apoptosis related,COVID-19,SARS-CoV,Serine Protease	Proteases	Nafamostat mesilate (Futhan, FUT-175) is a synthetic serine protease inhibitor, used as an anticoagulant during hemodialysis. Nafamostat mesylate blocks activation of SARS-CoV-2 and is investigated as a new treatment option for COVID-19. Nafamostat Mesilate attenuates inflammation and apoptosis.	539.58	82956-11-4	20	37.07	53	98.22	http://selleckchem.com/products/Nafamostat-mesylate.html	C19H17N5O2.2CH4O3S	Dimesylate	Futhan, FUT-175	C[S](O)(=O)=O.C[S](O)(=O)=O.NC(=N)NC1=CC=C(C=C1)C(=O)OC2=CC3=C(C=C2)C=C(C=C3)C(N)=N	1.364	2	3	6
S1387	Naftopidil DiHCl	e8	L8000-02	in 10mM DMSO	Adrenergic Receptor	Neuronal Signaling	Naftopidil DiHCl (Flivas, KT-611, Avishot,BM-15275) is a selective 5-HT1A and α1-adrenergic receptor antagonist with IC50 of 0.1 μM and 0.2 μM, respectively.	465.41	57149-08-3	41	88.09	<1	N/A	http://selleckchem.com/products/Naftopidil-Dihydrochloride.html	C24H28N2O3.2HCl	Dihydrochloride	Flivas, KT-611, Avishot,BM-15275	Cl.Cl.COC1=CC=CC=C1N2CCN(CC2)CC(O)COC3=C4C=CC=CC4=CC=C3	4.726	2	1	7
S1389	Omeprazole	f8	L8000-02	in 10mM DMSO	ATPase,Autophagy,Proton Pump	Transmembrane Transporters	Omeprazole is a proton pump inhibitor that blocks H(+)-K(+)-ATPase, used to treat dyspepsia, peptic ulcer disease, gastroesophageal reflux disease, laryngopharyngeal reflux, and Zollinger–Ellison syndrome.	345.42	73590-58-6	69	199.76	<1	N/A	http://selleckchem.com/products/Omeprazole.html	C17H19N3O3S	free base	N/A	COC1=CC=C2[NH]C(=NC2=C1)[S](=O)CC3=C(C)C(=C(C)C=N3)OC	2.904	5	1	5
S1390	Ondansetron HCl	g8	L8000-02	in 10mM DMSO	5-HT Receptor	Neuronal Signaling	Ondansetron HCl (Ondemet, Emeset, Emetron,GR 38032F,SN 307) is a serotonin 5-HT3 receptor antagonist, used to prevent nausea and vomiting caused by cancer chemotherapy, and radiation therapy.	329.82	99614-01-4	66	200.11	24	72.77	http://selleckchem.com/products/Ondansetron-hydrochloride.html	C18H19N3O.HCl	Hydrochloride	Ondemet, Emeset, Emetron,GR 38032F,SN 307	Cl.C[N]1C2=C(C(=O)C(CC2)C[N]3C=CN=C3C)C4=CC=CC=C14	3.016	2	0	2
S1391	Oxcarbazepine	h8	L8000-02	in 10mM DMSO	Sodium Channel	Transmembrane Transporters	Oxcarbazepine (GP47680) inhibits the binding of [3H]BTX to sodium channels with IC50 of 160 μM and also inhibits the influx of 22Na+ into rat brain synaptosomes with IC50 about 100 μM.	252.27	28721-07-5	7	27.75	<1	N/A	http://selleckchem.com/products/Oxcarbazepine.html	C15H12N2O2	free base	GP47680	NC(=O)N1C2=C(CC(=O)C3=C1C=CC=C3)C=CC=C2	2.131	2	1	0
S1393	Pirarubicin (NSC-333054)	a9	L8000-02	in 10mM DMSO	Antineoplastic and Immunosuppressive Antibiotics,Topoisomerase	DNA Damage/DNA Repair	Pirarubicin (NSC-333054,THP) is an anthracycline antibiotic, and also a DNA/RNA synthesis inhibitor by intercalating into DNA and interacts with topoisomerase II, used as an antineoplastic agent.	627.64	72496-41-4	7	11.15	<1	N/A	http://selleckchem.com/products/Pirarubicin.html	C32H37NO12	free base	NSC-333054,THP	COC1=CC=CC2=C1C(=O)C3=C(O)C4=C(CC(O)(CC4OC5CC(N)C(OC6CCCCO6)C(C)O5)C(=O)CO)C(=C3C2=O)O	1.091	8	4	7
S1394	Pizotifen Malate	b9	L8000-02	in 10mM DMSO	5-HT Receptor	Neuronal Signaling	Pizotifen Malate (Sandomigran, pizotyline,BC-105) is a benzocycloheptane based agent used for recurrent migraine headaches.	429.53	5189-11-7	21	48.89	<1	N/A	http://selleckchem.com/products/Pizotifen-malate.html	C19H21NS.C4H6O5	Malate	Sandomigran, pizotyline,BC-105	CN1CCC(CC1)=C2C3=C(CCC4=C2C=CC=C4)SC=C3.OC(CC(O)=O)C(O)=O	0.292	2	1	3
S1396	Resveratrol (SRT501)	c9	L8000-02	in 10mM DMSO	AMPK,Apoptosis related,Autophagy,COX,ERK,IκB/IKK,JNK,Lipoxygenase,Mitophagy,Sirtuin,Src,STAT	Autophagy	Resveratrol (SRT501, trans-Resveratrol) has a wide spectrum of targets including cyclooxygenases(i.e. COX, IC50=1.1 μM), lipooxygenases（LOX, IC50=2.7 μM）, kinases, sirtuins and other proteins. It has anti-cancer, anti-inflammatory, blood-sugar-lowering and other beneficial cardiovascular effects. Resveratrol induces mitophagy/autophagy and autophagy-dependent apoptosis.	228.24	501-36-0	45	197.16	<1	N/A	http://selleckchem.com/products/Resveratrol.html	C14H12O3	free base	trans-Resveratrol,SRT501	OC1=CC=C(C=C1)\C=C\C2=CC(=CC(=C2)O)O	3.09	0	3	2
S1397	Rocuronium Bromide	d9	L8000-02	in 10mM DMSO	AChR	Neuronal Signaling	Rocuronium Bromide (ORG 9426) is a competitive AchR antagonist, used in modern anaesthesia.	609.68	119302-91-9	122	200.1	122	200.1	http://selleckchem.com/products/Rocuronium-bromide.html	C32H53N2O4.Br	Bromide	ORG 9426	[Br-].CC(=O)OC1C(CC2C3CCC4CC(O)C(CC4(C)C3CCC12C)N5CCOCC5)[N+]6(CCCC6)CC=C	0.282	3	1	6
S1398	Stavudine (d4T)	e9	L8000-02	in 10mM DMSO	Reverse Transcriptase	Microbiology	Stavudine (d4T, BMY-27857, Sanilvudine, NSC 163661) is a nucleoside analog reverse transcriptase inhibitor (NARTI) active against HIV.	224.21	3056-17-5	45	200.7	<1	N/A	http://selleckchem.com/products/Stavudine.html	C10H12N2O4	free base	BMY-27857, Sanilvudine, NSC 163661,d4T	CC1=CN(C2OC(CO)C=C2)C(=O)NC1=O	-0.515	3	2	2
S1401	Tenofovir	f9	L8000-02	in 10mM DMSO	Antiviral,COVID-19,Reverse Transcriptase	Microbiology	Tenofovir (GS-1278) blocks reverse transcriptase and hepatitis B virus infections.	287.21	147127-20-6	4	13.93	2	6.96	http://selleckchem.com/products/Tenofovir.html	C9H14N5O4P	free base	GS-1278	CC(C[N]1C=NC2=C(N)N=CN=C12)OC[P](O)(O)=O	-0.772	4	1	5
S1403	Tigecycline (GAR-936)	g9	L8000-02	in 10mM DMSO	Antineoplastic and Immunosuppressive Antibiotics,Autophagy,Bacterial	Microbiology	Tigecycline (Tygacil, GAR-936, WAY-GAR-936, TBG-MINO) is bacteriostatic and is a protein synthesis inhibitor by binding to the 30S ribosomal subunit of bacteria and thereby blocking entry of Aminoacyl-tRNA into the A site of the ribosome during prokaryotic translation. Tigecycline induces autophagy by downregulating the PI3K-AKT-mTOR pathway.	585.65	220620-09-7	100	170.75	100	170.75	http://selleckchem.com/products/Tigecycline.html	C29H39N5O8	free base	Tygacil, GAR-936, WAY-GAR-936, TBG-MINO	CN(C)C1C2CC3CC4=C(C(=C(NC(=O)CNC(C)(C)C)C=C4N(C)C)O)C(=O)C3=C(O)C2(O)C(=O)C(=C1O)C(N)=O	-0.381	4	6	7
S1404	Trilostane	h9	L8000-02	in 10mM DMSO	Dehydrogenase	Metabolism	Trilostane (WIN 24540) is an inhibitor of 3β-hydroxysteroid dehydrogenase used in the treatment of Cushing’s syndrome.	329.43	13647-35-3	65	197.31	<1	N/A	http://selleckchem.com/products/Trilostane.html	C20H27NO3	free base	WIN 24540	CC12CCC3C(CCC45OC4C(=C(CC35C)C#N)O)C1CCC2O	2.434	1	2	0
S1405	Vecuronium Bromide	a10	L8000-02	in 10mM DMSO	AChR	Neuronal Signaling	Vecuronium Bromide (ORG NC45) is a non-depolarizing neuromuscular blocking agent, used for skeletal muscle relaxation during surgery.	637.73	50700-72-6	100	156.81	4	6.27	http://selleckchem.com/products/Vecuronium-Bromide.html	C34H57N2O4.Br	Bromide	ORG NC45	[Br-].CC(=O)OC1CC2CCC3C(CCC4(C)C3CC(C4OC(C)=O)[N+]5(C)CCCCC5)C2(C)CC1N6CCCCC6	1.73	4	0	6
S1407	Bimatoprost	b10	L8000-02	in 10mM DMSO	Prostaglandin Receptor	GPCR & G Protein	Bimatoprost(AGN 192024) is a prostaglandin analog used topically (as eye drops) to control the progression of glaucoma and in the management of ocular hypertension.	415.57	155206-00-1	36	86.63	<1	N/A	http://selleckchem.com/products/Bimatoprost.html	C25H37NO4	free base	AGN 192024	CCNC(=O)CCC\C=C/CC1C(O)CC(O)C1/C=C/C(O)CCC2=CC=CC=C2	3.03	1	4	12
S1408	Linezolid (PNU-100766)	c10	L8000-02	in 10mM DMSO	Antibiotics	Microbiology	Linezolid (Zyvoxid, Zyvoxam,PNU-100766) is a synthetic antibiotic used for the treatment of serious infections.	337.35	165800-03-3	67	198.61	<1	N/A	http://selleckchem.com/products/Linezolid(Zyvox).html	C16H20FN3O4	free base	Zyvoxid, Zyvoxam,PNU-100766	CC(=O)NCC1CN(C(=O)O1)C2=CC=C(N3CCOCC3)C(=C2)F	0.894	4	1	4
S1409	Alfuzosin HCl	d10	L8000-02	in 10mM DMSO	Adrenergic Receptor	Neuronal Signaling	Alfuzosin HCI(SL 77499 HCl) is an alpha1 receptor antagonist used to treat benign prostatic hyperplasia (BPH).	425.91	81403-68-1	85	199.57	85	199.57	http://selleckchem.com/products/Alfuzosin-hydrochloride.html	C19H27N5O4.HCl	Hydrochloride	SL 77499 HCl	Cl.COC1=C(OC)C=C2C(=NC(=NC2=C1)N(C)CCCNC(=O)C3CCCO3)N	1.8	6	2	8
S1425	Ranolazine 2HCl	e10	L8000-02	in 10mM DMSO	Calcium Channel	Transmembrane Transporters	Ranolazine 2HCl (RS-43285,RS 43285-193,Ranexa, renolazine,Ranolazine dihydrochloride) is a calcium uptake inhibitor via the sodium/calcium channal, used to treat chronic angina.	500.46	95635-56-6	100	199.82	100	199.82	http://selleckchem.com/products/Ranolazine-dihydrochloride.html	C24H33N3O4.2HCl	Dihydrochloride	RS-43285,RS 43285-193,Ranexa, renolazine,Ranolazine dihydrochloride	Cl.Cl.COC1=CC=CC=C1OCC(O)CN2CCN(CC2)CC(=O)NC3=C(C)C=CC=C3C	3.755	3	2	9
S1426	Repaglinide	f10	L8000-02	in 10mM DMSO	Potassium Channel	Transmembrane Transporters	Repaglinide (AG-EE 623 ZW) is a potassium channel blocker, which lowers blood glucose by stimulating the release of insulin from the pancreas, used the treatment of type II diabetes.	452.59	135062-02-1	91	201.06	<1	N/A	http://selleckchem.com/products/Repaglinide.html	C27H36N2O4	free base	AG-EE 623 ZW	CCOC1=C(C=CC(=C1)CC(=O)NC(CC(C)C)C2=CC=CC=C2N3CCCCC3)C(O)=O	5.307	3	1	10
S1430	Rolipram (ZK-62711)	g10	L8000-02	in 10mM DMSO	PDE	Metabolism	The PDE4 selective inhibitor, Rolipram (ZK-62711, SB 95952), inhibited immunopurified PDE4B and PDE4D activities similarly, with IC50 values of approx. 130 nM and 240 nM respectively; an anti-inflammatory agent.	275.34	61413-54-5	55	199.75	<1	N/A	http://selleckchem.com/products/Rolipram.html	C16H21NO3	free base	ZK-62711, SB 95952	COC1=C(OC2CCCC2)C=C(C=C1)C3CNC(=O)C3	2.349	3	1	4
S1431	Sildenafil Citrate	h10	L8000-02	in 10mM DMSO	PDE	Metabolism	Sildenafil Citrate, a selective inhibitor of cyclic guanosine monophosphate (cGMP)-specific phosphodiesterase type 5 (PDE5), is a well-tolerated and highly effective treatment for erectile dysfunction.	666.7	171599-83-0	20	30	<1	N/A	http://selleckchem.com/products/Sildenafil-citrate.html	C22H30N6O4S.C6H8O7	Citrate	N/A	CCCC1=N[N](C)C2=C1N=C(NC2=O)C3=CC(=CC=C3OCC)[S](=O)(=O)N4CCN(C)CC4.OC(=O)CC(O)(CC(O)=O)C(O)=O	-2.107	9	1	12
S1432	Sumatriptan Succinate	a11	L8000-02	in 10mM DMSO	5-HT Receptor	Neuronal Signaling	Sumatriptan Succinate (GR 43175) is a triptan sulfa drug containing a sulfonamide group for the treatment of migraine headaches.	413.49	103628-48-4	83	200.73	83	200.73	http://selleckchem.com/products/Sumatriptan-succinate.html	C14H21N3O2S.C4H6O4	Succinate	GR 43175	CN[S](=O)(=O)CC1=CC=C2[NH]C=C(CCN(C)C)C2=C1.OC(=O)CCC(O)=O	-1.958	4	2	9
S1437	Tizanidine HCl	c11	L8000-02	in 10mM DMSO	Adrenergic Receptor	Neuronal Signaling	Tizanidine HCl (DS 103-282) is an α2-adrenergic receptor agonist and inhibits neurotransmitter release from CNS noradrenergic neurons.	290.17	64461-82-1	10	34.46	15	51.69	http://selleckchem.com/products/Tizanidine-hydrochloride.html	C9H8ClN5S.HCl	Hydrochloride	DS 103-282	Cl.ClC1=C(NC2=NCCN2)C3=NSN=C3C=C1	2.199	3	2	2
S1438	Topiramate	d11	L8000-02	in 10mM DMSO	Carbonic Anhydrase	Metabolism	Topiramate (MCN 4853, RWJ 17021) is a mutil-targeted inhibitor, including voltage-gated sodium channel and calcium channel, AMPA/kainate receptor and carbonic anhydrase, used to treat epilepsy.	339.36	97240-79-4	68	200.38	<1	N/A	http://selleckchem.com/products/Topiramate.html	C12H21NO8S	free base	MCN 4853, RWJ 17021	CC1(C)OC2COC3(CO[S](N)(=O)=O)OC(C)(C)OC3C2O1	-1.932	6	1	3
S1439	Tranilast (SB 252218)	e11	L8000-02	in 10mM DMSO	Immunology & Inflammation related	Immunology & Inflammation	Tranilast (SB 252218, MK-341, Rizaben, MK 341, Tranpro) is an antiallergic drug by inhibiting lipid mediator and cytokine release from inflammatory cells, used for the treatment of allergic disorders such as asthma, allergic rhinitis and atopic dermatitis.	327.33	53902-12-8	66	201.63	<1	N/A	http://selleckchem.com/products/Tranilast.html	C18H17NO5	free base	SB 252218, MK-341, Rizaben, MK 341, Tranpro	COC1=C(OC)C=C(\C=C\C(=O)NC2=CC=CC=C2C(O)=O)C=C1	2.679	4	1	6
S1441	Venlafaxine HCl	f11	L8000-02	in 10mM DMSO	Serotonin Transporter	Neuronal Signaling	Venlafaxine HCl(Wy 453 HCl) is an arylalkanolamine serotonin-norepinephrine reuptake inhibitor (SNRI), used to treat major depressive disorder (MDD), generalised anxiety disorder (GAD), panic disorder and social phobia.	313.86	99300-78-4	55.5	176.83	55.5	176.83	http://selleckchem.com/products/Venlafaxine-hydrochloride.html	C17H27NO2.HCl	Hydrochloride	Wy 453 HCl	Cl.COC1=CC=C(C=C1)C(CN(C)C)C2(O)CCCCC2	3.404	1	0	5
S1442	Voriconazole (UK-109496)	g11	L8000-02	in 10mM DMSO	Fungal,P450 (e.g. CYP17)	Metabolism	Voriconazole (Vfend,UK-109496) is a new triazole derivative similar to fluconazole and itraconazole that acts by inhibiting fungal cytochrome P-450-dependent, 14-alpha-sterol demethylase-mediated synthesis of ergosterol.	349.31	137234-62-9	70	200.4	<1	N/A	http://selleckchem.com/products/Voriconazole.html	C16H14F3N5O	free base	Vfend,UK-109496	CC(C1=NC=NC=C1F)C(O)(C[N]2C=NC=N2)C3=CC=C(F)C=C3F	2.071	4	0	5
S1443	Zileuton (A-64077)	h11	L8000-02	in 10mM DMSO	Apoptosis related,Ferroptosis,Lipoxygenase	Metabolism	Zileuton (A-64077, Abbott 64077, ZYFLO) is an orally active inhibitor of 5-lipoxygenase, and thus inhibits leukotrienes (LTB4, LTC4, LTD4, and LTE4) formation, used to decrease the symptoms of asthma. Zileuton induces apoptosis while inhibits ferroptosis.	236.29	111406-87-2	47	198.91	<1	N/A	http://selleckchem.com/products/Zileuton.html	C11H12N2O2S	free base	A-64077, Abbott 64077, ZYFLO	CC(N(O)C(N)=O)C1=CC2=CC=CC=C2S1	2.184	1	1	2
S1444	Ziprasidone HCl	a2	L8000-03	in 10mM DMSO	5-HT Receptor,Dopamine Receptor	Neuronal Signaling	Ziprasidone HCl (CP-88059) is a novel and potent dopamine and serotonin (5-HT) receptor antagonist, used in the treatment of schizophrenia and bipolar disorder.	449.4	122883-93-6	90	200.27	<1	N/A	http://selleckchem.com/products/Ziprasidone-hydrochloride.html	C21H21ClN4OS.HCl	Hydrochloride	CP-88059	Cl.ClC1=CC2=C(CC(=O)N2)C=C1CCN3CCN(CC3)C4=NSC5=C4C=CC=C5	4.641	2	1	4
S1445	Zonisamide	b2	L8000-03	in 10mM DMSO	Sodium Channel	Transmembrane Transporters	Zonisamide (Zonegran,CI-912,AD 810) is a voltage-dependent sodium channel and T-type calcium channel blocker, used as an antiepileptic drug.	212.23	68291-97-4	42	197.9	<1	N/A	http://selleckchem.com/products/Zonisamide.html	C8H8N2O3S	free base	Zonegran,CI-912,AD 810	N[S](=O)(=O)CC1=NOC2=CC=CC=C12	0.411	4	1	2
S1453	Tipifarnib (R115777)	c2	L8000-03	in 10mM DMSO	FTase,Transferase	Metabolism	Tipifarnib (R115777, IND 58359) is a potent and specific farnesyltransferase (FTase) inhibitor with IC50 of 0.6 nM, its anti-proliferative effects are most prominent in H-ras or N-ras mutant cells. Phase 3.	489.4	192185-72-1	14	28.61	<1	N/A	http://selleckchem.com/products/Tipifarnib(R115777).html	C27H22Cl2N4O	free base	IND 58359	C[N]1C=NC=C1C(N)(C2=CC=C(Cl)C=C2)C3=CC4=C(C=C3)N(C)C(=O)C=C4C5=CC(=CC=C5)Cl	4.808	2	1	4
S1457	Atazanavir (BMS-232632) Sulfate	d2	L8000-03	in 10mM DMSO	HIV Protease	Proteases	Atazanavir Sulfate (BMS-232632-05, Reyataz) is a HIV protease inhibitor with Ki of 2.66 nM in a cell-free assay.	802.93	229975-97-7	104	129.53	<1	N/A	http://selleckchem.com/products/Atazanavir.html	C38H52N6O7.H2SO4	Sulfate	BMS-232632-05, Reyataz	COC(=O)NC(C(=O)NC(CC1=CC=CC=C1)C(O)CN(CC2=CC=C(C=C2)C3=NC=CC=C3)NC(=O)C(NC(=O)OC)C(C)(C)C)C(C)(C)C.O[S](O)(=O)=O	4.083	7	5	18
S1458	Neflamapimod (VX-745)	e2	L8000-03	in 10mM DMSO	p38 MAPK	MAPK	Neflamapimod (VX-745) is a potent and selective inhibitor of p38α with IC50 of 10 nM, 22-fold greater selectivity versus p38β and no inhibition to p38γ.	436.26	209410-46-8	15	34.38	<1	N/A	http://selleckchem.com/products/VX-745.html	C19H9Cl2F2N3OS	free base	N/A	FC1=CC(=C(SC2=NN3C=NC(=O)C(=C3C=C2)C4=C(Cl)C=CC=C4Cl)C=C1)F	5.342	3	0	3
S1465	Moxifloxacin (BAY12-8039) HCl	f2	L8000-03	in 10mM DMSO	Topoisomerase	DNA Damage/DNA Repair	Moxifloxacin (Avelox, Avalox,BAY12-8039 HCl) is a fourth-generation synthetic fluoroquinolone antibacterial agent.	437.89	186826-86-8	87	198.68	60	137.02	https://www.selleckchem.com/products/Moxifloxacin-hcl.html	C21H24FN3O4.HCl	Hydrochloride	Avelox, Avalox,BAY12-8039 HCl	Cl.COC1=C2N(C=C(C(O)=O)C(=O)C2=CC(=C1N3CC4CCCNC4C3)F)C5CC5	-0.32	3	1	4
S1467	Doxercalciferol	h2	L8000-03	in 10mM DMSO	Vitamin	Metabolism	Doxercalciferol (1α-hydroxyvitamin D2) is a synthetic vitamin D2 analog, suppressing parathyroid synthesis and secretion, used to treat secondary hyperparathyroidism and metabolic bone disease.	412.65	54573-75-0	83	201.14	<1	N/A	http://selleckchem.com/products/Doxercalciferol(Hectorol).html	C28H44O2	free base	1α-hydroxyvitamin D2	CC(C)C(C)/C=C/C(C)C1CCC2C(/CCCC12C)=C/C=C/3CC(O)CC(O)C3=C	6.337	0	2	5
S1468	Alfacalcidol	a3	L8000-03	in 10mM DMSO	Vitamin	Metabolism	Alfacalcidol (1-hydroxycholecalciferol) is a non-selective VDR activator medication.	400.64	41294-56-8	80	199.68	<1	N/A	http://selleckchem.com/products/Alfacalcidol.html	C27H44O2	free base	1-hydroxycholecalciferol	CC(C)CCCC(C)C1CCC2/C(CCCC12C)=C\C=C3/CC(O)CC(O)C3=C	6.53	0	2	6
S1483	Iloperidone	b3	L8000-03	in 10mM DMSO	5-HT Receptor	Neuronal Signaling	Iloperidone (HP873) is a dopamine (D2)/serotonin (5-HT2) receptor antagonist, used for the treatment of schizophrenia.	426.48	133454-47-4	27	63.31	<1	N/A	http://selleckchem.com/products/Iloperidone(Fanapt).html	C24H27FN2O4	free base	HP873	COC1=C(OCCCN2CCC(CC2)C3=NOC4=C3C=CC(=C4)F)C=CC(=C1)C(C)=O	4.016	5	0	8
S1485	HMN-214	c3	L8000-03	in 10mM DMSO	PLK	Cell Cycle	HMN-214 is a prodrug of HMN-176, which alters the cellular spatial orientation of Plk1.	424.47	173529-46-9	12	28.27	<1	N/A	http://selleckchem.com/products/HMN-214.html	C22H20N2O5S	free base	N/A	COC1=CC=C(C=C1)[S](=O)(=O)N(C(C)=O)C2=C(C=CC=C2)\C=C\C3=CC=[N+]([O-])C=C3	2.282	4	0	6
S1488	Naratriptan HCl	d3	L8000-03	in 10mM DMSO	5-HT Receptor	Neuronal Signaling	Naratriptan HCl is a triptan agent that is used for the treatment of migraine headaches.	371.93	143388-64-1	74	198.96	22	59.15	http://selleckchem.com/products/Naratriptan(Amerge).html	C17H25N3O2S.HCl	Hydrochloride	N/A	Cl.CN[S](=O)(=O)CCC1=CC=C2[NH]C=C(C3CCN(C)CC3)C2=C1	2.435	2	2	5
S1490	Ponatinib (AP24534)	e3	L8000-03	in 10mM DMSO	Autophagy,Bcr-Abl,FGFR,PDGFR,Src,VEGFR	Angiogenesis	Ponatinib (AP24534) is a novel, potent multi-target inhibitor of Abl, PDGFRα, VEGFR2, FGFR1 and Src with IC50 of 0.37 nM, 1.1 nM, 1.5 nM, 2.2 nM and 5.4 nM in cell-free assays, respectively. Ponatinib (AP24534) inhibits autophagy.	532.56	943319-70-8	30	56.33	<1	N/A	http://selleckchem.com/products/AP24534.html	C29H27F3N6O	free base	AP24534	CN1CCN(CC1)CC2=C(C=C(NC(=O)C3=CC(=C(C)C=C3)C#CC4=CN=C5C=CC=N[N]45)C=C2)C(F)(F)F	4.884	3	1	7
S1491	Fludarabine (NSC 118218)	f3	L8000-03	in 10mM DMSO	Apoptosis related,DNA/RNA Synthesis,Nucleoside Analog/Antimetabolite,STAT	JAK/STAT	Fludarabine (NSC 118218, FaraA, Fludarabinum) is a STAT1 activation inhibitor which causes a specific depletion of STAT1 protein (and mRNA) but not of other STATs. Also a DNA synthesis inhibitor in vascular smooth muscle cells. Fludarabine induces apoptosis.	285.23	21679-14-1	57	199.84	<1	N/A	http://selleckchem.com/products/Fludarabine(Fludara).html	C10H12FN5O4	Free Base	FaraA, Fludarabinum, NSC 118218	NC1=NC(=NC2=C1N=C[N]2C3OC(CO)C(O)C3O)F	-1.312	4	4	2
S1497	Pralatrexate (NSC 754230)	g3	L8000-03	in 10mM DMSO	Apoptosis related,DHFR	Metabolism	Pralatrexate (NSC 754230) is an antifolate, and structurally a folate analog. Its IC50 is < 300 nM in some cell lines. Pralatrexate induces tumor cell apoptosis.	477.47	146464-95-1	28	58.64	<1	N/A	http://selleckchem.com/products/Pralatrexate(Folotyn).html	C23H23N7O5	free base	NSC 754230	NC1=NC(=C2N=C(CC(CC#C)C3=CC=C(C=C3)C(=O)NC(CCC(O)=O)C(O)=O)C=NC2=N1)N	1.94	7	3	10
S1499	Cefaclor	h3	L8000-03	in 10mM DMSO	Antibiotics	Microbiology	Cefaclor (Cefachlor, Cefaclorum) is a cephalosporin antibiotic.	385.82	70356-03-5	11	28.51	<1	N/A	http://selleckchem.com/products/Cefaclor-(Ceclor).html	C15H14ClN3O4S.H2O	monohydrate	Cefachlor, Cefaclorum	O.NC(C(=O)NC1C2SCC(=C(N2C1=O)C(O)=O)Cl)C3=CC=CC=C3	-2.54	3	2	4
S1500	Betamethasone	a4	L8000-03	in 10mM DMSO	Glucocorticoid Receptor	Endocrinology & Hormones	Betamethasone (NSC-39470, SCH-4831) is a glucocorticoid steroid with anti-inflammatory and immunosuppressive properties.	392.46	378-44-9	79	201.29	<1	N/A	http://selleckchem.com/products/Betamethasone-(Celestone).html	C22H29FO5	Free Base	NSC-39470, SCH-4831	CC1CC2C3CCC4=CC(=O)C=CC4(C)C3(F)C(O)CC2(C)C1(O)C(=O)CO	1.708	2	2	2
S1501	Mycophenolate mofetil (RS-61443)	b4	L8000-03	in 10mM DMSO	Apoptosis related,Dehydrogenase	Metabolism	Mycophenolate Mofetil (RS 61443, Mycophenolic acid morpholinoethyl ester, CellCept, TM-MMF) is a non-competitive, selective and reversible inhibitor of inosine monophosphate dehydrogenase I/II with IC50 of 39 nM and 27 nM, respectively. Mycophenolate Mofetil induces caspase-dependent apoptosis and cell cycle inhibition in multiple myeloma cells.	433.49	128794-94-5	86	198.39	<1	N/A	http://selleckchem.com/products/Mycophenolate-mofetil-(CellCept).html	C23H31NO7	free base	Mycophenolic acid morpholinoethyl ester, CellCept, RS 61443, TM-MMF	COC1=C(C)C2=C(C(=O)OC2)C(=C1C\C=C(C)\CCC(=O)OCCN3CCOCC3)O	3.209	6	1	10
S1504	Dyphylline	c4	L8000-03	in 10mM DMSO	PDE	Metabolism	Dyphylline (Diprophylline) is a xanthine derivative with bronchodilator and vasodilator effects.	254.24	479-18-5	51	200.6	51	200.6	http://selleckchem.com/products/Dyphylline(Dilor).html	C10H14N4O4	free base	Diprophylline	CN1C(=O)N(C)C2=C([N](CC(O)CO)C=N2)C1=O	-1.151	3	2	3
S1505	Aztreonam	d4	L8000-03	in 10mM DMSO	Antibiotics,Bacterial	Microbiology	Aztreonam (SQ 26776) is a synthetic monocyclic beta-lactam antibiotic, used to treat Gram-negative aerobic bacteria infection.	435.43	78110-38-0	87	199.8	11	25.26	http://selleckchem.com/products/Aztreonam(Azactam).html	C13H17N5O8S2	free base	SQ 26776	CC1C(NC(=O)\C(=N/OC(C)(C)C(O)=O)C2=CSC(=N2)N)C(=O)N1[S](O)(=O)=O	-1.035	6	2	7
S1512	Tadalafil (IC351)	e4	L8000-03	in 10mM DMSO	PDE	Metabolism	Tadalafil (IC351) is a PDE-5 inhibitor with IC50 of 1.8 nM in a cell-free assay. Tadalafil is at least 9000 times more selective for PDE5 than most of the other families of PDEs, with the exception of PDE11. It can partial inhibits PDE11	389.4	171596-29-5	78	200.31	<1	N/A	http://selleckchem.com/products/Tadalafil(Cialis).html	C22H19N3O4	free base	IC351	CN1CC(=O)N2C(CC3=C([NH]C4=C3C=CC=C4)C2C5=CC=C6OCOC6=C5)C1=O	2.183	4	1	1
S1514	Cyclosporine	f4	L8000-03	in 10mM DMSO	Immunology & Inflammation related,phosphatase	Metabolism	Cyclosporine is a calcineurin phosphatase pathway inhibitor, used as an immunosuppressant drug to prevent rejection in organ transplantation.	1202.61	79217-60-0	100	83.15	<1	N/A	http://selleckchem.com/products/Cyclosporine.html	C62H111N11O12	free base	Neoral	CCC1NC(=O)C(C(O)C(C)C\C=C\C)N(C)C(=O)C(C(C)C)N(C)C(=O)C(CC(C)C)N(C)C(=O)C(CC(C)C)N(C)C(=O)C(C)NC(=O)C(C)NC(=O)C(CC(C)C)N(C)C(=O)C(NC(=O)C(CC(C)C)N(C)C(=O)CN(C)C1=O)C(C)C	4.333	11	5	15
S1517	Natamycin	g4	L8000-03	in 10mM DMSO	Fungal	Microbiology	Natamycin (Pimaricin), a natural and versatile anti-fungal agent during fermentation by the bacterium Streptomyces natalensis, commonly found in soil; with little to no flavour interference	665.73	7681-93-8	7	10.51	<1	N/A	http://selleckchem.com/products/Natamycin(Pimaricin).html	C33H47NO13	free base	Pimaricin	CC1C/C=C/C=C/C=C/C=C/C(CC2OC(O)(CC(O)CC3OC3/C=C/C(=O)O1)CC(O)C2C(O)=O)OC4OC(C)C(O)C(N)C4O	-2.824	7	5	3
S1526	Quizartinib (AC220)	h4	L8000-03	in 10mM DMSO	Apoptosis related,FLT3,Target Protein Ligand	Angiogenesis	Quizartinib (AC220) is a second-generation FLT3 inhibitor for Flt3(ITD/WT) with IC50 of 1.1 nM/4.2 nM in MV4-11 and RS4;11 cells, respectively, 10-fold more selective for Flt3 than KIT, PDGFRα, PDGFRβ, RET, and CSF-1R. Quizartinib (AC220) induces apoptosis of tumor cells. Phase 3.	560.67	950769-58-1	33	58.86	<1	N/A	http://selleckchem.com/products/AC-220.html	C29H32N6O4S	free base	N/A	CC(C)(C)C1=CC(=NO1)NC(=O)NC2=CC=C(C=C2)C3=C[N]4C(=N3)SC5=CC(=CC=C45)OCCN6CCOCC6	5.064	6	2	8
S1547	Febuxostat	a5	L8000-03	in 10mM DMSO	ROS	Immunology & Inflammation	Febuxostat (TMX 67, TEI-6720) is a selective xanthine oxidase inhibitor with Ki of 0.6 nM.	316.37	144060-53-7	63	199.13	<1	N/A	http://selleckchem.com/products/Febuxostat(Uloric).html	C16H16N2O3S	free base	TMX 67, TEI-6720	CC(C)COC1=C(C=C(C=C1)C2=NC(=C(S2)C(O)=O)C)C#N	3.468	3	0	5
S1548	Dapagliflozin (BMS-512148)	b5	L8000-03	in 10mM DMSO	SGLT	GPCR & G Protein	Dapagliflozin (BMS-512148) is a potent and selective hSGLT2 inhibitor with EC50 of 1.1 nM, exhibiting 1200-fold selectivity over hSGLT1. Phase 4.	408.87	461432-26-8	82	200.55	<1	N/A	http://selleckchem.com/products/Dapagliflozin.html	C21H25ClO6	free base	BMS-512148	CCOC1=CC=C(CC2=CC(=CC=C2Cl)C3OC(CO)C(O)C(O)C3O)C=C1	2.409	2	4	6
S1549	Nebivolol hydrochloride (R-65824)	c5	L8000-03	in 10mM DMSO	Adrenergic Receptor	Neuronal Signaling	Nebivolol HCl (R-65824) selectively inhibits β1-adrenoceptor with IC50 of 0.8 nM.	441.9	152520-56-4	88	199.14	<1	N/A	http://selleckchem.com/products/Nebivolol(Bystolic).html	C22H25F2NO4.HCl	Hydrochloride	R-65824 hydrochloride	Cl.OC(CNCC(O)C1CCC2=C(O1)C=CC(=C2)F)C3CCC4=CC(=CC=C4O3)F	3.939	2	3	6
S1550	Pimobendan	d5	L8000-03	in 10mM DMSO	PDE	Metabolism	Pimobendan (UD-CG 115 BS) is a selective inhibitor of PDE3 with IC50 of 0.32 μM.	334.37	74150-27-9	67	200.38	<1	N/A	http://selleckchem.com/products/Pimobendan(Vetmedin).html	C19H18N4O2	free base	UD-CG 115 BS	COC1=CC=C(C=C1)C2=NC3=CC(=CC=C3[NH]2)C4=NNC(=O)CC4C	2.936	4	2	3
S1565	Lumacaftor (VX-809)	e5	L8000-03	in 10mM DMSO	CFTR	Transmembrane Transporters	Lumacaftor (VX-809, VRT 826809) acts to correct CFTR mutations common in cystic fibrosis by increasing mutant CFTR (F508del-CFTR) maturation,EC50 of 0.1 μM in fisher rat thyroid cells. Phase 3.	452.41	936727-05-8	90	198.93	<1	N/A	http://selleckchem.com/products/VX-809.html	C24H18F2N2O5	free base	VRT 826809	CC1=C(N=C(NC(=O)C2(CC2)C3=CC4=C(OC(F)(F)O4)C=C3)C=C1)C5=CC=CC(=C5)C(O)=O	6.411	5	1	5
S1567	Pomalidomide (CC-4047)	f5	L8000-03	in 10mM DMSO	Apoptosis related,E3 Ligase ,E3 ligase Ligand,TNF-alpha	Ubiquitin	Pomalidomide (CC-4047) inhibits LPS-induced TNF-α release with IC50 of 13 nM in PBMCs. Pomalidomide can be utilized in PROTAC as a ligand for targeting E3 ligase and inhibiting the E3 ligase protein cereblon (CRBN). Pomalidomide promotes apoptosis and cell cycle arrest.	273.24	19171-19-8	54	197.63	<1	N/A	http://selleckchem.com/products/Pomalidomide(CC-4047).html	C13H11N3O4	free base	CC-4047	NC1=C2C(=O)N(C3CCC(=O)NC3=O)C(=O)C2=CC=C1	-0.65	4	2	1
S1569	Tazarotene	g5	L8000-03	in 10mM DMSO	Retinoid Receptor	Metabolism	Tazarotene (AGN190168) is a retinoid prodrug of tazarotenic acid, which is a RAR agonist, used to treat psoriasis, acne, and sun damaged skin.	351.46	118292-40-3	10	28.45	<1	N/A	http://selleckchem.com/products/Tazarotene(Avage).html	C21H21NO2S	free base	AGN190168	CCOC(=O)C1=CN=C(C=C1)C#CC2=CC3=C(SCCC3(C)C)C=C2	4.951	3	0	5
S1573	Fasudil (HA-1077) HCl	h5	L8000-03	in 10mM DMSO	Autophagy,Calcium Channel,MLCK,PKA,PKC,PKG,Rho,ROCK	Cell Cycle	Fasudil (HA-1077, AT-877), a potent and selective inhibitor of Rho kinase, displays less potent inhibiton over PKA, PKG, PKC and MLCK with Ki of 1.6, 1.6, 3.3, and 36 μM in cell-free assays, respectively. Fasudil is also a calcium channel blocker.	327.83	105628-07-7	5	15.25	65	198.27	http://selleckchem.com/products/Fasudil-HCl(HA-1077).html	C14H17N3O2S.HCl	Hydrochloride	AT-877,HA-1077 HCl	Cl.O=[S](=O)(N1CCCNCC1)C2=C3C=CN=CC3=CC=C2	0.57	3	1	2
S1576	Sulfasalazine (NSC 667219)	a6	L8000-03	in 10mM DMSO	Apoptosis related,Autophagy,COX,Ferroptosis,Immunology & Inflammation related,NF-κB,TGF-beta/Smad	Immunology & Inflammation	Sulfasalazine (NSC 667219, Azulfidine, Salazopyrin, Sulphasalazine) is a sulfa derivative of mesalazine, used as an anti-inflammatory agent to treat bowel disease and rheumatoid arthritis. Sulfasalazine is a potent and specific inhibitor of nuclear factor kappa B (NF-κB), TGF-β and COX-2. Sulfasalazine induces ferroptosis, apoptosis and autophagy.	398.39	599-79-1	80	200.81	<1	N/A	http://selleckchem.com/products/Sulfasalazine(Azulfidine).html	C18H14N4O5S	free base	Azulfidine, Salazopyrin, Sulphasalazine, NSC 667219	OC(=O)C1=C(O)C=CC(=C1)N=NC2=CC=C(C=C2)[S](=O)(=O)NC3=CC=CC=N3	3.463	6	2	6
S1578	Candesartan (CV-11974)	b6	L8000-03	in 10mM DMSO	Angiotensin Receptor	GPCR & G Protein	Candesartan (CV-11974) is an angiotensin II receptor antagonist with IC50 of 0.26 nM.	440.45	139481-59-7	88	199.8	<1	N/A	http://selleckchem.com/products/Candesartan(Atacand).html	C24H20N6O3	free base	CV-11974	CCOC1=NC2=C([N]1CC3=CC=C(C=C3)C4=CC=CC=C4C5=N[NH]N=N5)C(=CC=C2)C(O)=O	4.626	6	1	7
S1591	Bestatin (NK421)	c6	L8000-03	in 10mM DMSO	Immunology & Inflammation related	Immunology & Inflammation	Bestatin (Ubenimex,NK421) is a potent aminopeptidase-B and leukotriene (LT) A4 hydrolase inhibitor, used in the treatment of acute myelocytic leukemia.	308.37	58970-76-6	4	12.97	<1	N/A	http://www.selleck.cn/products/Ubenimex(Bestatin).html	C16H24N2O4	Free Base	Ubenimex,NK421	CC(C)CC(NC(=O)C(O)C(N)CC1=CC=CC=C1)C(O)=O	-1.34	2	3	8
S1593	Apixaban (BMS 562247-01)	d6	L8000-03	in 10mM DMSO	Factor Xa	Metabolism	Apixaban (BMS 562247-01) is a highly selective, reversible inhibitor of Factor Xa with Ki of 0.08 nM and 0.17 nM in human and rabbit, respectively.	459.5	503612-47-3	18	39.17	<1	N/A	http://selleckchem.com/products/Apixaban(BMS-562247-01).html	C25H25N5O4	free base	BMS 562247-01	COC1=CC=C(C=C1)[N]2N=C(C(N)=O)C3=C2C(=O)N(CC3)C4=CC=C(C=C4)N5CCCCC5=O	2.865	5	1	5
S1601	Reserpine	e6	L8000-03	in 10mM DMSO	VMAT	Transmembrane Transporters	Reserpine is an inhibitor of multidrug efflux pumps, used as an antipsychotic and antihypertensive drug. Reserpine is an inhibitor of the vesicular monoamine transporter 2 (VMAT2).	608.68	50-55-5	13	21.36	<1	N/A	http://selleckchem.com/products/Reserpine.html	C33H40N2O9	free base	N/A	COC1C(CC2CN3CCC4=C([NH]C5=C4C=CC(=C5)OC)C3CC2C1C(=O)OC)OC(=O)C6=CC(=C(OC)C(=C6)OC)OC	4.242	9	1	10
S1603	Furosemide (NSC 269420)	f6	L8000-03	in 10mM DMSO	NKCC	Transmembrane Transporters	Furosemide (NSC 269420) is a potent NKCC2 (Na-K-2Cl symporter) inhibitor, used in the treatment of congestive heart failure and edema.	330.74	54-31-9	66	199.55	<1	N/A	http://selleckchem.com/products/Furosemide(Lasix).html	C12H11ClN2O5S	free base	NSC 269420	N[S](=O)(=O)C1=C(Cl)C=C(NCC2=CC=CO2)C(=C1)C(O)=O	1.403	4	2	5
S1604	Olmesartan Medoxomil	g6	L8000-03	in 10mM DMSO	Angiotensin Receptor	GPCR & G Protein	Olmesartan Medoxomil (CS-866,RNH-6270) is a selective angiotensin II type 1 (AT(1)) receptor antagonist, used in the treatment of high blood pressure.	558.59	144689-63-4	89	159.33	<1	N/A	http://selleckchem.com/products/olmesartan-medoxomil-Benicar.html	C29H30N6O6	free base	CS-866,RNH-6270	CCCC1=NC(=C([N]1CC2=CC=C(C=C2)C3=CC=CC=C3C4=N[NH]N=N4)C(=O)OCC5=C(C)OC(=O)O5)C(C)(C)O	4.814	9	1	11
S1605	Cefdinir	h6	L8000-03	in 10mM DMSO	Antibiotics,Bacterial	Microbiology	Cefdinir (FK 482, PD 134393, CI-983) is an oral cephalosporin antibiotic, used to treat bacterial infections in many different parts of the body.	395.41	91832-40-5	79	199.79	<1	N/A	http://selleckchem.com/products/Cefdinir(Omnicef).html	C14H13N5O5S2	free base	FK 482, PD 134393, CI-983	NC1=NC(=CS1)C(=N/O)/C(=O)NC2C3SCC(=C(N3C2=O)C(O)=O)C=C	-0.172	5	2	5
S1606	Clotrimazole	a7	L8000-03	in 10mM DMSO	Antineoplastic and Immunosuppressive Antibiotics,Fungal	Microbiology	Clotrimazole (BAY b 5097, FB 5097) alters the permeability of the fungal cell wall by inhibiting the biosynthesis of ergosterol, used in the treatment of fungal infections.	344.84	23593-75-1	11	31.9	<1	N/A	http://selleckchem.com/products/Clotrimazole(Canesten).html	C22H17ClN2	free base	BAY b 5097, FB 5097	ClC1=C(C=CC=C1)C([N]2C=CN=C2)(C3=CC=CC=C3)C4=CC=CC=C4	5.222	1	0	4
S1607	Rizatriptan Benzoate	b7	L8000-03	in 10mM DMSO	5-HT Receptor	Neuronal Signaling	Rizatriptan Benzoate (MK-462) is an agonist at serotonin 5-HT1B and 5-HT1D receptors, used to treat acute migraine attacks.	391.47	145202-66-0	20	51.09	46	117.51	http://selleckchem.com/products/Rizatriptan-Benzoate(Maxalt).html	C22H25N5O2	Benzoate	MK-462 Benzoate	CN(C)CCC1=C[NH]C2=C1C=C(C[N]3C=NC=N3)C=C2.OC(=O)C4=CC=CC=C4	0.492	3	1	6
S1608	Pyridostigmine Bromide	c7	L8000-03	in 10mM DMSO	AChR	Neuronal Signaling	Pyridostigmine Bromide is a parasympathomimetic and a reversible cholinesterase inhibitor.	261.12	101-26-8	52	199.14	52	199.14	http://selleckchem.com/products/Pyridostigmine-Bromide(Mestinon).html	C9H13BrN2O2	Bromide	N/A	[Br-].CN(C)C(=O)OC1=C[N+](=CC=C1)C	-1.014	2	0	2
S1613	Silodosin	d7	L8000-03	in 10mM DMSO	Adrenergic Receptor	Neuronal Signaling	Silodosin (KAD 3213, KMD 3213) is a highly selective α1A-adrenoceptor antagonist, used in treatment of benign prostatic hyperplasia.	495.53	160970-54-7	99	199.79	<1	N/A	http://selleckchem.com/products/Silodosin(Rapaflo).html	C25H32F3N3O4	free base	KAD 3213, KMD 3213	CC(CC1=CC2=C(N(CCCO)CC2)C(=C1)C(N)=O)NCCOC3=CC=CC=C3OCC(F)(F)F	3.451	3	3	14
S1614	Riluzole (PK 26124)	e7	L8000-03	in 10mM DMSO	GluR,Sodium Channel	Transmembrane Transporters	Riluzole (PK 26124, RP-54274) is a glutamate release inhibitor with neuroprotective, anticonvulsant, anxiolytic and anesthetic qualities.	234.2	1744-22-5	46	196.41	<1	N/A	http://selleckchem.com/products/Riluzole(Rilutek).html	C8H5F3N2OS	free base	RP-54274, PK 26124	NC1=NC2=C(S1)C=C(OC(F)(F)F)C=C2	3.828	2	1	2
S1618	Sulfameter	f7	L8000-03	in 10mM DMSO	Bacterial	Immunology & Inflammation	Sulfameter is a long-acting sulfonamide antibacterial.	280.3	651-06-9	56	199.79	<1	N/A	http://selleckchem.com/products/Sulfameter(Bayrena).html	C11H12N4O3S	free base	N/A	COC1=CN=C(N[S](=O)(=O)C2=CC=C(N)C=C2)N=C1	0.297	5	2	4
S1622	Prednisone (NSC-10023)	g7	L8000-03	in 10mM DMSO	Glucocorticoid Receptor,Immunology & Inflammation related	Endocrinology & Hormones	Prednisone (NSC-10023, Adasone) is a synthetic corticosteroid agent that is particularly effective as an immunosuppressant compound.	358.43	53-03-2	71	198.09	<1	N/A	http://selleckchem.com/products/Prednisone.html	C21H26O5	free base	Adasone,NSC-10023	CC12CC(=O)C3C(CCC4=CC(=O)C=CC34C)C1CCC2(O)C(=O)CO	1.217	3	1	2
S1625	Ethinyl Estradiol	a8	L8000-03	in 10mM DMSO	Estrogen/progestogen Receptor	Endocrinology & Hormones	Ethinyl Estradiol is an orally bio-active estrogen used in almost all modern formulations of combined oral contraceptive pills.	296.4	57-63-6	59	199.06	<1	N/A	http://selleckchem.com/products/Ethinyl-Estradiol.html	C20H24O2	free base	N/A	CC12CCC3C(CCC4=CC(=CC=C34)O)C1CCC2(O)C#C	4.886	0	1	0
S1626	Naproxen Sodium	b8	L8000-03	in 10mM DMSO	COX	Neuronal Signaling	Naproxen Sodium (RS-3650) is a COX inhibitor for COX-1 and COX-2 with IC50 of 8.7 μM and 5.2 μM, respectively.	252.24	26159-34-2	3	11.89	50	198.22	http://selleckchem.com/products/Naproxen-Sodium(Aleve).html	C14H13NaO3	Sodium Salt	RS-3650	[Na+].COC1=CC=C2C=C(C=CC2=C1)C(C)C([O-])=O	1.375	1	0	3
S1627	Nitazoxanide (NSC 697855)	c8	L8000-03	in 10mM DMSO	Autophagy,Influenza Virus,mTOR,Serotonin Transporter	Microbiology	Nitazoxanide (NTZ, NSC 697855) is a synthetic nitrothiazolyl-salicylamide derivative and an antiprotozoal agent(IC50 for canine influenza virus ranges from 0.17 to 0.21 μM). Nitazoxanide modulates autophagy and inhibits mTORC1 signaling.	307.28	55981-09-4	62	201.77	<1	N/A	http://selleckchem.com/products/Nitazoxanide(Alinia).html	C12H9N3O5S	free base	NTZ, NSC 697855	CC(=O)OC1=C(C=CC=C1)C(=O)NC2=NC=C(S2)[N+]([O-])=O	1.398	4	1	5
S1628	Triamcinolone Acetonide	d8	L8000-03	in 10mM DMSO	Glucocorticoid Receptor	Metabolism	Triamcinolone acetonide is a synthetic glucocorticoid, used in the symptomatic treatment of inflammation.	434.5	76-25-5	87	200.23	<1	N/A	http://selleckchem.com/products/Triamcinolone-Acetonide.html	C24H31FO6	free base	N/A	CC1(C)OC2CC3C4CCC5=CC(=O)C=CC5(C)C4(F)C(O)CC3(C)C2(O1)C(=O)CO	1.157	4	2	2
S1629	Orlistat (Ro 18-0647)	e8	L8000-03	in 10mM DMSO	Apoptosis related,Fatty Acid Synthase,Lipase	Metabolism	Orlistat (Ro 18-0647, Tetrahydrolipstatin) is a general lipase inhibitor with IC50 of 122 ng/ml for PL from human duodenal juice. Orlistat treatment reduces proliferation, induces apoptosis and arrests cell cycle.	495.73	96829-58-2	99	199.71	<1	N/A	http://selleckchem.com/products/Orlistat(Alli).html	C29H53NO5	free base	Tetrahydrolipstatin,Ro 18-0647	CCCCCCCCCCCC(CC1OC(=O)C1CCCCCC)OC(=O)C(CC(C)C)NC=O	8.333	5	1	23
S1630	Allopurinol	f8	L8000-03	in 10mM DMSO	ROS	Immunology & Inflammation	Allopurinol is a purine analog inhibitor of the enzyme xanthine oxidase, used to treat gout or kidney stones, and to decrease levels of uric acid.	136.11	315-30-0	27	198.37	4	29.39	http://selleckchem.com/products/Allopurinol(Zyloprim).html	C5H4N4O	Free Base	N/A	O=C1N=CN=C2NNC=C12	-2.125	3	2	0
S1631	Allopurinol Sodium	g8	L8000-03	in 10mM DMSO	ROS	Immunology & Inflammation	Allopurinol Sodium is a xanthine oxidase inhibitor with an IC50 of 7.82±0.12 μM.	159.1	17795-21-0	32	201.13	32	201.13	http://selleckchem.com/products/Allopurinol-Sodium(Aloprim).html	C5H4N4NaO	Sodium Salt	N/A	[Na+].O=C1NC=NC2=C1C=N[NH]2	-0.681	3	2	0
S1633	Zafirlukast (ICI-204219)	h8	L8000-03	in 10mM DMSO	LTR	Immunology & Inflammation	Zafirlukast (ICI-204219) is an oral leukotriene receptor antagonist (LTRA), used to prevent asthma symptoms.	575.68	107753-78-6	100	173.71	<1	N/A	http://selleckchem.com/products/Zafirlukast(Accolate).html	C31H33N3O6S	free base	ICI-204219	COC1=CC(=CC=C1CC2=C[N](C)C3=C2C=C(NC(=O)OC4CCCC4)C=C3)C(=O)N[S](=O)(=O)C5=CC=CC=C5C	6.299	6	2	9
S1635	Erythromycin	a9	L8000-03	in 10mM DMSO	Antibiotics,Antibiotics for Mammalian Cell Culture	Microbiology	Erythromycin (E-Mycin) is a macrolide antibiotic that has an antimicrobial spectrum similar to or slightly wider than that of penicillin (IC50=1.5 μg/ml).	733.93	114-07-8	147	200.29	3	4.09	http://selleckchem.com/products/Erythromycin(E-Mycin).html	C37H67NO13	Free Base	E-Mycin	CCC1OC(=O)C(C)C(OC2CC(C)(OC)C(O)C(C)O2)C(C)C(OC3OC(C)CC(C3O)N(C)C)C(C)(O)CC(C)C(=O)C(C)C(O)C1(C)O	1.792	8	3	7
S1638	Ibuprofen (NSC 256857)	b9	L8000-03	in 10mM DMSO	COX	Neuronal Signaling	Ibuprofen (NSC 256857, Dolgesic) is an anti-inflammatory inhibitor targeting COX-1 and COX-2 with IC50 of 13 μM and 370 μM, respectively.	206.28	15687-27-1	41	198.76	<1	N/A	http://selleckchem.com/products/Ibuprofen(Advil).html	C13H18O2	free base	Dolgesic,NSC 256857	CC(C)CC1=CC=C(C=C1)C(C)C(O)=O	3.607	1	0	4
S1639	Amprenavir (VX-478)	c9	L8000-03	in 10mM DMSO	HIV Protease	Proteases	Amprenavir (VX-478, 141W94, KVX-478) is a potent PXR-selective agonist, and an HIV protease inhibitor, used to treat HIV.	505.63	161814-49-9	16	31.64	<1	N/A	http://selleckchem.com/products/Amprenavir-(Agenerase).html	C25H35N3O6S	free base	141W94, VX-478, KVX-478	CC(C)CN(CC(O)C(CC1=CC=CC=C1)NC(=O)OC2CCOC2)[S](=O)(=O)C3=CC=C(N)C=C3	2.429	5	3	12
S1640	Albendazole (SKF-62979)	d9	L8000-03	in 10mM DMSO	ADC Cytotoxin,Microtubule Associated	Cytoskeletal Signaling	Albendazole (SKF-62979) is a member of the benzimidazole compounds used as a drug indicated for the treatment of a variety of worm infestations.	265.33	54965-21-8	17	64.07	<1	N/A	http://selleckchem.com/products/Albendazole(Albenza).html	C12H15N3O2S	free base	SKF-62979	CCCSC1=CC=C2N=C(NC(=O)OC)[NH]C2=C1	3.065	3	2	5
S1641	Chlorothiazide	e9	L8000-03	in 10mM DMSO	Others	Others	Chlorothiazide is a diuretic and antihypertensive. (IC50=3.8 mM)	295.72	58-94-6	59	199.51	<1	N/A	http://selleckchem.com/products/Chlorothiazide(Diuril).html	C7H6ClN3O4S2	free base	N/A	N[S](=O)(=O)C1=C(Cl)C=C2N=CN[S](=O)(=O)C2=C1	-0.177	5	2	1
S1643	Ursodiol	f9	L8000-03	in 10mM DMSO	FXR	GPCR & G Protein	Ursodiol (Ursodeoxycholic acid, UDCA) reduces cholesterol absorption and is used to dissolve (cholesterol) gallstones. (IC50=0.22 μM)	392.57	128-13-2	79	201.24	<1	N/A	http://selleckchem.com/products/Ursodiol(Actigal).html	C24H40O4	free base	Ursodeoxycholic acid, UDCA	CC(CCC(O)=O)C1CCC2C3C(O)CC4CC(O)CCC4(C)C3CCC12C	4.014	1	2	4
S1644	Nitrofural	g9	L8000-03	in 10mM DMSO	Anti-infection	Microbiology	Nitrofural (Nitrofurazone) is a topical anti-infective agent with an IC50 of 22.83 ± 1.2 μM. (Rat LD50 = 590 mg/kg)	198.14	59-87-0	40	201.88	<1	N/A	http://selleckchem.com/products/Nitrofurazone(ACTIN-N).html	C6H6N4O4	free base	Nitrofurazone	NC(=O)N/N=C/C1=CC=C(O1)[N+]([O-])=O	0.223	3	2	3
S1645	Ketoprofen	h9	L8000-03	in 10mM DMSO	COX	Neuronal Signaling	Ketoprofen (RP-19583) is a dual COX1/2 inhibitor, used as a nonsteroidal anti-inflammatory drug to treat arthritis-related inflammatory pains.	254.28	22071-15-4	51	200.57	<1	N/A	http://selleckchem.com/products/Ketoprofen(Actron).html	C16H14O3	free base	RP-19583	CC(C(O)=O)C1=CC(=CC=C1)C(=O)C2=CC=CC=C2	3.361	2	0	4
S1647	Adenosine	a10	L8000-03	in 10mM DMSO	Adenosine Receptor,Nucleoside Analog/Antimetabolite	GPCR & G Protein	Adenosine is a nucleoside composed of a molecule of adenine attached to a ribose sugar molecule (ribofuranose) moiety via a β-N9-glycosidic bond.	267.24	58-61-7	12	44.9	<1	N/A	http://selleckchem.com/products/Adenosine(Adenocard).html	C10H13N5O4	free base	N/A	NC1=NC=NC2=C1N=C[N]2C3OC(CO)C(O)C3O	-1.881	4	4	2
S1649	Zolmitriptan	b10	L8000-03	in 10mM DMSO	5-HT Receptor	Neuronal Signaling	Zolmitriptan(BW-311C90) is a novel and highly selective 5-HT(1B/1D) receptor agonist, used in the treatment of acute migraines.	287.36	139264-17-8	58	201.84	<1	N/A	http://selleckchem.com/products/Zolmitriptan(Zomig).html	C16H21N3O2	free base	BW-311C90	CN(C)CCC1=C[NH]C2=C1C=C(CC3COC(=O)N3)C=C2	2.457	2	2	5
S1651	Telbivudine	c10	L8000-03	in 10mM DMSO	Reverse Transcriptase	Microbiology	Telbivudine(NV 02B) is a potent, and selective HBV reverse transcriptase inhibitor, used to treat HBV infection.	242.23	3424-98-4	48	198.16	48	198.16	http://selleckchem.com/products/Telbivudine(Sebivo).html	C10H14N2O5	free base	NV 02B	CC1=CN(C2CC(O)C(CO)O2)C(=O)NC1=O	-1.238	3	3	2
S1652	Monobenzone	d10	L8000-03	in 10mM DMSO	Tyrosinase	Proteases	Monobenzone(Benoquin) is a compound used as a topical agent for medical depigmentation. It can specifically block tyrosinase.	200.23	103-16-2	40	199.77	<1	N/A	http://selleckchem.com/products/Monobenzone(Benoquin).html	C13H12O2	free base	Benoquin	OC1=CC=C(OCC2=CC=CC=C2)C=C1	3.155	1	1	3
S1653	Tretinoin (NSC 122758)	e10	L8000-03	in 10mM DMSO	Retinoid Receptor	Metabolism	Tretinoin (Retinoic acid, All-trans Retinoic Acid, ATRA, Vitamin A acid, Vesanoid, Airol, Renova, Atralin, Retin-A, Avita, Stieva-A,NSC 122758), which is a ligand for both the retinoic acid receptor (RAR) and the retinoid X receptor (RXR), can induce granulocytic differentiation and apoptosis in acute promyelocytic leukemia (APL) cells.	300.4	302-79-4	60	199.73	<1	N/A	http://selleckchem.com/products/Tretinoin(Aberela).html	C20H28O2	free base	Retinoic acid, All-trans Retinoic Acid, ATRA, Vitamin A acid, Vesanoid, Airol, Renova, Atralin, Retin-A, Avita, Stieva-A,NSC 122758	CC1=C(\C=C\C(C)=C\C=C\C(C)=C\C(O)=O)C(C)(C)CCC1	5.551	1	0	5
S1654	Phenylbutazone	f10	L8000-03	in 10mM DMSO	Immunology & Inflammation related	Immunology & Inflammation	Phenylbutazone (Butazolidine) is used as a non-steroidal anti-inflammatory agent for the treatment of chronic pain, including the symptoms of arthritis.	308.37	50-33-9	62	201.06	<1	N/A	http://selleckchem.com/products/Phenylbutazone(Butazolidin).html	C19H20N2O2	free base	Butazolidine	CCCCC1C(=O)N(N(C1=O)C2=CC=CC=C2)C3=CC=CC=C3	3.954	2	0	5
S1655	Ezetimibe (SCH-58235)	g10	L8000-03	in 10mM DMSO	LDL	Metabolism	Ezetimibe (SCH-58235) is a potent, selective, cholesterol absorption inhibitor, used to lower cholesterol.	409.4	163222-33-1	81	197.85	<1	N/A	http://selleckchem.com/products/Ezetimibe(Zetia).html	C24H21F2NO3	free base	SCH-58235	OC(CCC1C(N(C1=O)C2=CC=C(F)C=C2)C3=CC=C(O)C=C3)C4=CC=C(F)C=C4	4.633	1	2	6
S1658	Dofetilide	h10	L8000-03	in 10mM DMSO	Potassium Channel	Transmembrane Transporters	Dofetilide (UK-68798) is a selective potassium channel ((hERG)) blocker, used as a Class III antiarrhythmic drug.	441.56	115256-11-6	88	199.29	<1	N/A	http://selleckchem.com/products/Dofetilide(Tikosyn).html	C19H27N3O5S2	free base	UK-68798	CN(CCOC1=CC=C(N[S](C)(=O)=O)C=C1)CCC2=CC=C(N[S](C)(=O)=O)C=C2	1.679	5	2	11
S1665	Estrone	a11	L8000-03	in 10mM DMSO	Estrogen/progestogen Receptor	Endocrinology & Hormones	Estrone is an estrogenic hormone.	270.37	53-16-7	54	199.73	<1	N/A	http://selleckchem.com/products/Estrone.html	C18H22O2	free base	N/A	CC12CCC3C(CCC4=CC(=CC=C34)O)C1CCC2=O	3.938	1	1	0
S1666	Flucytosine	b11	L8000-03	in 10mM DMSO	Fungal	Microbiology	Flucytosine (5-Fluorocytosine, 5-FC, NSC 103805, Ro 2-9915) is an antifungal drug with IC50 of 0.93 μM in C. albicans.	129.09	2022-85-7	8	61.97	5	38.73	http://selleckchem.com/products/Flucytosine(Ancobon).html	C4H4FN3O	free base	5-Fluorocytosine, 5-FC, NSC 103805, Ro 2-9915	NC1=NC(=O)NC=C1F	-1.048	2	2	0
S1667	Trichlormethiazide	c11	L8000-03	in 10mM DMSO	Others	Others	Trichlormethiazide is a diuretic with properties similar to those of hydrochlorothiazide.	380.66	133-67-5	54	141.86	<1	N/A	http://selleckchem.com/products/Trichlormethiazide(Achletin).html	C8H8Cl3N3O4S2	free base	N/A	N[S](=O)(=O)C1=C(Cl)C=C2NC(N[S](=O)(=O)C2=C1)C(Cl)Cl	1.046	4	3	2
S1679	Flurbiprofen	e11	L8000-03	in 10mM DMSO	Immunology & Inflammation related	Immunology & Inflammation	Flurbiprofen is a member of the phenylalkanoic acid derivative family of non-steroidal anti-inflammatory drugs (NSAIDs).	244.26	5104-49-4	49	200.61	<1	N/A	http://selleckchem.com/products/Flurbiprofen(Ansaid).html	C15H13FO2	free base	N/A	CC(C(O)=O)C1=CC(=C(C=C1)C2=CC=CC=C2)F	3.68	1	0	3
S1680	Disulfiram (NSC 190940)	f11	L8000-03	in 10mM DMSO	Apoptosis related,COVID-19,Dehydrogenase,Pyroptosis	Metabolism	Disulfiram (NSC 190940, Tetraethylthiuram disulfide, TETD) is a specific inhibitor of aldehyde-dehydrogenase (ALDH) with IC50 of 0.15 μM and 1.45 μM for hALDH1 and hALDH2, respectively. Disulfiram is used for the treatment of chronic alcoholism by producing an acute sensitivity to alcohol. Disulfiram induces apoptosis. Disulfiram is also an inhibitor of pore formation by gasdermin D (GSDMD).	296.54	97-77-8	59	198.96	<1	N/A	http://selleckchem.com/products/Disulfiram(Antabuse).html	C10H20N2S4	free base	NSC 190940, Tetraethylthiuram disulfide, TETD	CCN(CC)C(=S)SSC(=S)N(CC)CC	5.6	0	0	9
S1681	Mesalamine (5-ASA)	g11	L8000-03	in 10mM DMSO	Immunology & Inflammation related,IκB/IKK	NF-κB	Mesalamine (5-Aminosalicylic acid, 5-ASA, Mesalazine, Apriso, Asacol, Pentasa, Canasa) is a specific inhibitor of TNFα-induced IKK activity, used to treat inflammatory bowel disease.	153.14	89-57-6	31	202.43	<1	N/A	http://selleckchem.com/products/Mesalamine(Lialda).html	C7H7NO3	free base	5-Aminosalicylic acid, 5-ASA, Mesalazine, Apriso, Asacol, Pentasa, Canasa	NC1=CC=C(O)C(=C1)C(O)=O	0.471	1	2	1
S1683	Ipratropium Bromide	h11	L8000-03	in 10mM DMSO	AChR	Neuronal Signaling	Ipratropium Bromide is an antagonist of M3 type muscarinic acetylcholine receptors, used for the treatment of chronic obstructive pulmonary disease (COPD).	412.37	22254-24-6	83	201.28	83	201.28	http://selleckchem.com/products/Ipratropium-bromide.html	C20H30BrNO3	Bromide	N/A	[Br-].CC(C)[N+]1(C)C2CCC1CC(C2)OC(=O)C(CO)C3=CC=CC=C3	-1.326	2	1	6
S1685	Sulfanilamide	a2	L8000-04	in 10mM DMSO	Bacterial	Microbiology	Sulfanilamide (Sulphanilamide) is a competitive inhibitor for bacterial enzyme dihydropteroate synthetase with IC50 of 320 μM.	172.2	63-74-1	34	197.44	<1	N/A	http://selleckchem.com/products/Sulfanilamide.html	C6H8N2O2S	free base	N/A	NC1=CC=C(C=C1)[S](N)(=O)=O	-0.212	2	2	1
S1688	Betamethasone Dipropionate	b2	L8000-04	in 10mM DMSO	Glucocorticoid Receptor	Endocrinology & Hormones	Betamethasone Dipropionate (SCH 11460) is a glucocorticoid steroid with anti-inflammatory and immunosuppressive abilities.	504.59	5593-20-4	100	198.18	<1	N/A	http://selleckchem.com/products/Betamethasone-Dipropionate(Diprolene).html	C28H37FO7	Free Base	SCH 11460	CCC(=O)OCC(=O)C1(OC(=O)CC)C(C)CC2C3CCC4=CC(=O)C=CC4(C)C3(F)C(O)CC12C	3.8	6	1	8
S1689	Meprednisone	c2	L8000-04	in 10mM DMSO	Glucocorticoid Receptor	Endocrinology & Hormones	Meprednisone (NSC 527579, SCH 4358) is a glucocorticoid and a methylated derivative of prednisone.	372.46	1247-42-3	75	201.37	<1	N/A	http://selleckchem.com/products/Betapar(Meprednisone).html	C22H28O5	free base	NSC 527579, SCH 4358	CC1CC2C3CCC4=CC(=O)C=CC4(C)C3C(=O)CC2(C)C1(O)C(=O)CO	1.536	3	1	2
S1690	Betamethasone Valerate	d2	L8000-04	in 10mM DMSO	Glucocorticoid Receptor	Endocrinology & Hormones	Betamethasone Valerate is a moderately potent glucocorticoid steroid with anti-inflammatory and immunosuppressive properties.	476.58	2152-44-5	95	199.34	<1	N/A	http://selleckchem.com/products/Betamethasone-valerate(Betnovate).html	C27H37FO6	free base	N/A	CCCCC(=O)OC1(C(C)CC2C3CCC4=CC(=O)C=CC4(C)C3(F)C(O)CC12C)C(=O)CO	3.666	4	2	7
S1692	Busulfan (NSC-750)	e2	L8000-04	in 10mM DMSO	Apoptosis related,DNA alkylator	DNA Damage/DNA Repair	Busulfan (NSC-750) is a cell cycle non-specific alkylating antineoplastic agent. Busulfan induces apoptosis.	246.3	55-98-1	49	198.94	<1	N/A	http://selleckchem.com/products/Busulfan(Busulfex).html	C6H14O6S2	free base	NSC-750	C[S](=O)(=O)OCCCCO[S](C)(=O)=O	-0.289	2	0	7
S1693	Carbamazepine	f2	L8000-04	in 10mM DMSO	Autophagy,Sodium Channel	Transmembrane Transporters	Carbamazepine (Carbatrol, NSC 169864) is a sodium channel blocker with IC50 of 131 μM in rat brain synaptosomes.	236.27	298-46-4	47	198.92	<1	N/A	http://selleckchem.com/products/Carbamazepine(Carbatrol).html	C15H12N2O	free base	NSC 169864	NC(=O)N1C2=C(C=CC=C2)C=CC3=C1C=CC=C3	2.679	1	1	0
S1696	Hydrocortisone (NSC 10483)	g2	L8000-04	in 10mM DMSO	Glucocorticoid Receptor	Endocrinology & Hormones	Hydrocortisone (NSC 10483, Cortisol) is a steroid hormone or glucocorticoid produced by the adrenal gland.	362.46	50-23-7	73	201.4	<1	N/A	http://selleckchem.com/products/Hydrocortisone.html	C21H30O5	free base	Cortisol	CC12CCC(=O)C=C1CCC3C4CCC(O)(C(=O)CO)C4(C)CC(O)C23	1.283	2	2	2
S1701	Desonide	h2	L8000-04	in 10mM DMSO	Glucocorticoid Receptor	Endocrinology & Hormones	Desonide is a low potency topical corticosteroid.	416.51	638-94-8	83	199.27	<1	N/A	http://selleckchem.com/products/Desonide.html	C24H32O6	free base	N/A	CC1(C)OC2CC3C4CCC5=CC(=O)C=CC5(C)C4C(O)CC3(C)C2(O1)C(=O)CO	1.028	4	2	2
S1702	Didanosine	a3	L8000-04	in 10mM DMSO	Reverse Transcriptase	Microbiology	Didanosine is a reverse transcriptase inhibitor with an IC50 of 0.49 μM.	236.23	69655-05-6	47	198.96	<1	N/A	http://selleckchem.com/products/Didanosine(Videx).html	C10H12N4O3	free base	N/A	OCC1CCC(O1)[N]2C=NC3=C2N=CNC3=O	-0.844	4	2	2
S1705	Progesterone (NSC 9704)	b3	L8000-04	in 10mM DMSO	Estrogen/progestogen Receptor	Endocrinology & Hormones	Progesterone (NSC 9704, NSC 64377, Pregn-4-ene-3,20-dione) is an endogenous steroid hormone involved in the menstrual cycle, pregnancy, and embryogenesis of humans and other species. A potent agonist of the nuclear progesterone receptor (nPR) with Kd of 1 nM; An agonist of the membrane progesterone receptors(mPRs); An antagonist of the σ1 receptor.	314.46	57-83-0	22	69.96	<1	N/A	http://selleckchem.com/products/Progesterone(Prometrium).html	C21H30O2	free base	NSC 64377, Pregn-4-ene-3,20-dione,NSC 9704	CC(=O)C1CCC2C3CCC4=CC(=O)CCC4(C)C3CCC12C	3.86	2	0	1
S1706	Lamivudine (BCH-189)	c3	L8000-04	in 10mM DMSO	COVID-19,Reverse Transcriptase	Microbiology	Lamivudine (BCH-189, GR109714X) is a potent nucleoside analog reverse transcriptase inhibitor, used for treatment of chronic HBV and HIV/AIDS. It works by blocking the HIV reverse transcriptase and hepatitis B virus polymerase.	229.26	134678-17-4	46	200.65	46	200.65	http://selleckchem.com/products/Lamivudine(Epivir).html	C8H11N3O3S	free base	GR109714X, BCH-189	NC1=NC(=O)N(C=C1)C2CSC(CO)O2	-0.59	3	2	2
S1709	Estradiol	d3	L8000-04	in 10mM DMSO	Estrogen/progestogen Receptor,Interleukins	Endocrinology & Hormones	Estradiol (17β-estradiol, β-Estradiol, E2, 17β-Oestradiol) is a human sex hormone and steroid, and the primary female sex hormone. Estradiol upregulates IL-6 expression through the estrogen receptor β (ERβ) pathway.	272.38	50-28-2	54	198.25	<1	N/A	http://selleckchem.com/products/Estradiol.html	C18H24O2	free base	17β-estradiol, β-Estradiol, E2, 17β-Oestradiol	CC12CCC3C(CCC4=C3C=CC(=C4)O)C1CCC2O	3.838	0	2	0
S1712	Deferasirox (ICL-670)	e3	L8000-04	in 10mM DMSO	Ferroptosis,P450 (e.g. CYP17)	Proteases	Deferasirox (ICL-670, CGP-72670) is an iron chelator, also a cytochrome P450 3A4 inducer, Cytochrome P450 2C8 inhibitor, and Cytochrome P450 1A2 inhibitor. Deferasirox-induced iron depletion promotes BclxL downregulation and cell death.	373.36	201530-41-8	74	198.2	<1	N/A	http://selleckchem.com/products/Deferasirox(Exjade).html	C21H15N3O4	free base	CGP-72670, ICL-670	OC(=O)C1=CC=C(C=C1)[N]2N=C(N=C2C3=CC=CC=C3O)C4=CC=CC=C4O	4.063	3	2	4
S1713	Piroxicam	f3	L8000-04	in 10mM DMSO	COX	Neuronal Signaling	Piroxicam (CP 16171) is a non-selective COX inhibitor, used in the treatment of rheumatoid and osteoarthritis.	331.35	36322-90-4	66	199.19	<1	N/A	http://selleckchem.com/products/Piroxicam(Feldene).html	C15H13N3O4S	free base	CP 16171	CN1C(=C(O)C2=C(C=CC=C2)[S]1(=O)=O)C(=O)NC3=NC=CC=C3	0.501	4	2	2
S1714	Gemcitabine (LY-188011)	g3	L8000-04	in 10mM DMSO	Apoptosis related,Autophagy,DNA/RNA Synthesis,Nucleoside Analog/Antimetabolite	DNA Damage/DNA Repair	Gemcitabine (LY-188011, NSC 613327), a nucleic acid synthesis inhibitor, is a very potent and specific deoxycytidine analogue, used as chemotherapy. Gemcitabine induces a potent p53-dependent apoptosis.	263.2	95058-81-4	52	197.57	52	197.57	http://selleckchem.com/products/Gemcitabine(Gemzar).html	C9H11F2N3O4	Free Base	LY-188011, NSC 613327	NC1=NC(=O)N(C=C1)C2OC(CO)C(O)C2(F)F	-1.394	3	3	2
S1715	Glipizide	h3	L8000-04	in 10mM DMSO	Potassium Channel	Transmembrane Transporters	Glipizide (CP-28720,K 4024) is used to treat high blood sugar levels caused by a type of diabetes mellitus called type 2 diabetes.	445.54	29094-61-9	89	199.76	<1	N/A	http://selleckchem.com/products/Glipizide(Glucotrol).html	C21H27N5O4S	free base	CP-28720,K 4024	CC1=NC=C(N=C1)C(=O)NCCC2=CC=C(C=C2)[S](=O)(=O)NC(=O)NC3CCCCC3	1.902	6	3	7
S1718	Adefovir Dipivoxil (GS 0840)	a4	L8000-04	in 10mM DMSO	Reverse Transcriptase	Microbiology	Adefovir Dipivoxil (GS 0840) is a reverse transcriptase inhibitor, used in the treatment of chronic hepatitis B virus (HBV).	501.47	142340-99-6	100	199.41	<1	N/A	http://selleckchem.com/products/Adefovir-Dipivoxil(Preveon).html	C20H32N5O8P	free base	GS 0840	CC(C)(C)C(=O)OCO[P](=O)(COCC[N]1C=NC2=C1N=CN=C2N)OCOC(=O)C(C)(C)C	1.666	10	1	15
S1721	Azathioprine	b4	L8000-04	in 10mM DMSO	Rho	Cell Cycle	Azathioprine(BW 57-322) is an immunosuppressive drug, inhibiting purine synthesis and GTP-binding protein Rac1 activation, used in the treatment of organ transplantation and autoimmune diseases.	277.26	446-86-6	54	194.76	<1	N/A	http://selleckchem.com/products/Azathioprine(Azasan).html	C9H7N7O2S	free base	BW 57-322	C[N]1C=NC(=C1SC2=C3[NH]C=NC3=NC=N2)[N+]([O-])=O	1.071	4	1	3
S1723	Indomethacin (NSC-77541)	c4	L8000-04	in 10mM DMSO	COX	Neuronal Signaling	Indomethacin (NSC-77541, Indometacin) is a nonselective COX1 and COX2 inhibitor with IC50 of 0.1 μg/mL and 5 μg/mL, respectively, used to reduce fever, pain, stiffness, and swelling.	357.79	53-86-1	72	201.24	<1	N/A	http://selleckchem.com/products/Indomethacin(Indocid).html	C19H16ClNO4	free base	Indometacin,NSC-77541	COC1=CC=C2[N](C(=C(CC(O)=O)C2=C1)C)C(=O)C3=CC=C(Cl)C=C3	4.235	3	0	4
S1727	Levonorgestrel	d4	L8000-04	in 10mM DMSO	Estrogen/progestogen Receptor	Endocrinology & Hormones	Levonorgestrel (D-Norgestrel) is a female hormone that prevents ovulation.	312.45	797-63-7	45	144.02	<1	N/A	http://selleckchem.com/products/Levonorgestrel(Levonelle).html	C21H28O2	free base	D-Norgestrel	CCC12CCC3C(CCC4=CC(=O)CCC34)C1CCC2(O)C#C	4.771	1	0	1
S1729	Gemfibrozil	e4	L8000-04	in 10mM DMSO	PPAR	Metabolism	Gemfibrozil (CI-719) is an activator of peroxisome proliferator-activated receptor-alpha (PPARα), used for the treatment of hypercholesterolemia and hypertriglyceridemia.	250.33	25812-30-0	50	199.74	<1	N/A	http://selleckchem.com/products/Gemfibrozil(Lopid).html	C15H22O3	free base	CI-719	CC1=CC(=C(C)C=C1)OCCCC(C)(C)C(O)=O	4.172	2	0	6
S1730	Indapamide	f4	L8000-04	in 10mM DMSO	Others	Others	Indapamide is a non-thiazide sulphonamide diuretic compound, generally used in the treatment of hypertension, as well as decompensated cardiac failure.	365.83	26807-65-8	73	199.55	<1	N/A	http://selleckchem.com/products/Indapamide(Lozol).html	C16H16ClN3O3S	free base	N/A	CC1CC2=C(C=CC=C2)N1NC(=O)C3=CC=C(Cl)C(=C3)[S](N)(=O)=O	2.664	3	2	3
S1732	Mitotane	g4	L8000-04	in 10mM DMSO	Others	Others	Mitotane (NCI-C04933), is an antineoplastic medication used in the treatment of adrenocortical carcinoma.	320.04	53-19-0	64	199.98	<1	N/A	http://selleckchem.com/products/Mitotane(Lysodren).html	C14H10Cl4	free base	NCI-C04933	ClC(Cl)C(C1=CC=C(Cl)C=C1)C2=C(Cl)C=CC=C2	5.745	0	0	3
S1733	Methylprednisolone (NSC-19987)	h4	L8000-04	in 10mM DMSO	ACE,Apoptosis related,Autophagy,Glucocorticoid Receptor,Immunology & Inflammation related,Interleukins	Endocrinology & Hormones	Methylprednisolone (NSC-19987,U 7532) is a synthetic glucocorticoid receptor agonist, used to achieve prompt suppression of inflammation. Methylprednisolone activates ACE2 and reduces IL-6 levels, thus improves severe or critical COVID-19. Methylprednisolone markedly reduces autophagy and apoptosis.	374.47	83-43-2	75	200.28	<1	N/A	http://selleckchem.com/products/Methylprednisolone.html	C22H30O5	free base	NSC-19987,U 7532	CC1CC2C3CCC(O)(C(=O)CO)C3(C)CC(O)C2C4(C)C=CC(=O)C=C14	1.512	2	2	2
S1734	Meloxicam	a5	L8000-04	in 10mM DMSO	COX	Neuronal Signaling	Meloxicam is a selective COX inhibitor, used to relieve pain and fever effects.	351.4	71125-38-7	30	85.37	<1	N/A	http://selleckchem.com/products/Meloxicam(Mobic).html	C14H13N3O4S2	free base	N/A	CN1C(=C(O)C2=C(C=CC=C2)[S]1(=O)=O)C(=O)NC3=NC=C(C)S3	0.255	4	2	2
S1735	Mesna	b5	L8000-04	in 10mM DMSO	Others	Others	Mesna, a sulfhydryl compound that is used to reduce the incidence of hemorrhagic cystitis associated with certain chemotherapeutic agents.	164.18	19767-45-4	33	201	7	42.64	http://selleckchem.com/products/Mesna(Uromitexan).html	C2H5NaO3S2	Sodium Salt	N/A	[Na+].[O-][S](=O)(=O)CCS	-2.227	0	0	2
S1736	Methocarbamol	c5	L8000-04	in 10mM DMSO	Carbonic Anhydrase	Metabolism	Methocarbamol (AHR 85) is a carbonic anhydrase inhibitor, used as a central muscle relaxant to treat skeletal muscle spasms.	241.24	532-03-6	48	198.97	2	8.29	http://selleckchem.com/products/Methocarbamol(Robaxin).html	C11H15NO5	free base	AHR 85	COC1=C(OCC(O)COC(N)=O)C=CC=C1	0.916	4	2	7
S1738	Telmisartan	d5	L8000-04	in 10mM DMSO	Angiotensin Receptor	GPCR & G Protein	Telmisartan (BIBR 277) is an angiotensin II receptor antagonist (ARB) used in the management of hypertension.	514.62	144701-48-4	13	25.26	<1	N/A	http://selleckchem.com/products/Telmisartan(Micardis).html	C33H30N4O2	free base	BIBR 277	CCCC1=NC2=C(C=C(C=C2C)C3=NC4=C(C=CC=C4)[N]3C)[N]1CC5=CC=C(C=C5)C6=CC=CC=C6C(O)=O	7.799	3	0	7
S1739	Thiabendazole	e5	L8000-04	in 10mM DMSO	P450 (e.g. CYP17)	Metabolism	Thiabendazole inhibits the mitochondrial helminth-specific enzyme, fumarate reductase, with anthelminthic property, used as an anthelmintic and fungicide agent. It is a potent inhibitor of cytochrome P450 1A2 (CYP1A2).	201.25	148-79-8	40	198.76	<1	N/A	http://selleckchem.com/products/Thiabendazole.html	C10H7N3S	free base	N/A	[NH]1C2=C(C=CC=C2)N=C1C3=CSC=N3	2.154	2	1	1
S1741	Rifabutin (LM427)	f5	L8000-04	in 10mM DMSO	Antibiotics,Antineoplastic and Immunosuppressive Antibiotics,Bacterial	Microbiology	Rifabutin (LM427, Ansamycin) is a semisynthetic ansamycin antibiotic, used in the treatment of Mycobacterium avium intracellulare (MAI) and tuberculosis.	847	72559-06-9	60	70.84	<1	N/A	http://selleckchem.com/products/Rifabutin(Mycobutin).html	C46H62N4O11	free base	LM427, Ansamycin	COC1\C=C\OC2(C)OC3=C(C2=O)C4=C(C(=C3C)O)C(=O)C(=C5NC6(CCN(CC6)CC(C)C)N=C45)NC(=O)/C(=C/C=C/C(C)C(O)C(C)C(O)C(C)C(OC(C)=O)C1C)C	3.931	9	5	5
S1742	Nevirapine (NSC 641530)	g5	L8000-04	in 10mM DMSO	Reverse Transcriptase	Microbiology	Nevirapine (NSC 641530,NVP) is a non-nucleoside reverse transcriptase inhibitor (NNRTI) used to treat HIV-1 infection and AIDS.	266.3	129618-40-2	53	199.02	<1	N/A	http://selleckchem.com/products/Nevirapine(Viramune).html	C15H14N4O	free base	NSC 641530,NVP	CC1=CC=NC2=C1NC(=O)C3=C(N=CC=C3)N2C4CC4	2.293	3	1	1
S1747	Nimodipine	h5	L8000-04	in 10mM DMSO	Autophagy,Calcium Channel	Transmembrane Transporters	Nimodipine (BAY E 9736) is a dihydropyridine calcium channel blocker and an autophagy inhibitor, used in the treatment of high blood pressure.	418.44	66085-59-4	84	200.75	<1	N/A	http://selleckchem.com/products/Nimodipine(Nimotop).html	C21H26N2O7	free base	BAY E 9736	COCCOC(=O)C1=C(C)NC(=C(C1C2=CC=CC(=C2)[N+]([O-])=O)C(=O)OC(C)C)C	2.361	5	1	10
S1754	Oxybutynin	a6	L8000-04	in 10mM DMSO	AChR	Neuronal Signaling	Oxybutynin is a competitive antagonist of the M1, M2, and M3 subtypes of the muscarinic acetylcholine receptor, used to relieve urinary and bladder difficulties.	357.49	5633-20-5	71	198.61	<1	N/A	http://selleckchem.com/products/Oxybutynin(Ditropan).html	C22H31NO3	Free Base	N/A	CCN(CC)CC#CCOC(=O)C(O)(C1CCCCC1)C2=CC=CC=C2	4.646	2	0	10
S1756	Enoxacin	b6	L8000-04	in 10mM DMSO	Topoisomerase	DNA Damage/DNA Repair	Enoxacin (AT-2266, CI919, Pd107779, NSC 629661) is an oral broad-spectrum fluoroquinolone antibacterial agent by inhibiting bacterial DNA gyrase and topoisomerase IV, used to treat a wide variety of infections.	320.32	74011-58-8	32	99.9	<1	N/A	http://selleckchem.com/products/Enoxacin(Penetrex).html	C15H17FN4O3	free base	AT-2266, CI919, Pd107779, NSC 629661	CCN1C=C(C(O)=O)C(=O)C2=CC(=C(N=C12)N3CCNCC3)F	-1.483	3	1	3
S1759	Pitavastatin (NK-104) calcium	c6	L8000-04	in 10mM DMSO	Apoptosis related,Autophagy,COVID-19,HMG-CoA Reductase,Mitophagy	Metabolism	Pitavastatin Calcium (NK-104, P-872441, itavastatin, nisvastatin), a novel member of the medication class of statins, is a calcium salt formulation of pitavastatin which is a highly effective HMG-CoA reductase inhibitor. Pitavastatin Calcium attenuates AGEs-induced mitophagy via inhibition of ROS generation. Pitavastatin Calcium induces autophagy and apoptosis.	880.98	147526-32-7	51	57.89	<1	N/A	http://selleckchem.com/products/Pitavastatin-calcium(Livalo).html	C50H46CaF2N2O8	Calcium salt	NK-104, P-872441, itavastatin, nisvastatin	[Ca++].OC(CC(O)C=CC1=C(C2=CC=C(F)C=C2)C3=CC=CC=C3N=C1C4CC4)CC([O-])=O.OC(CC(O)C=CC5=C(C6=CC=C(F)C=C6)C7=CC=CC=C7N=C5C8CC8)CC([O-])=O	4.96	2	4	16
S1760	Rifapentine	d6	L8000-04	in 10mM DMSO	DNA/RNA Synthesis	DNA Damage/DNA Repair	Rifapentine (MDL473) is an antibiotic, which inhibits DNA-dependent RNA polymerase activity, used to treat tuberculosis.	877.03	61379-65-5	100	114.02	<1	N/A	http://selleckchem.com/products/Rifapentine(Priftin).html	C47H64N4O12	free base	MDL473	COC1\C=C\OC2(C)OC3=C(C2=O)C4=C(O)C(=C(NC(=O)\C(=C\C=C\C(C)C(O)C(C)C(O)C(C)C(OC(C)=O)C1C)C)C(=C4C(=C3C)O)O)\C=N\N5CCN(CC5)C6CCCC6	4.664	8	6	6
S1761	Suprofen	e6	L8000-04	in 10mM DMSO	COX	Neuronal Signaling	Suprofen(TN-762) is a dual COX-1/COX-2 inhibitor, used as a non-steroidal anti-inflammatory analgesic and antipyretic.	260.31	40828-46-4	52	199.76	<1	N/A	http://selleckchem.com/products/Suprofen(Profenal).html	C14H12O3S	free base	TN-762	CC(C(O)=O)C1=CC=C(C=C1)C(=O)C2=CC=CS2	3.314	2	0	4
S1763	Quetiapine (ICI-204636) fumarate	f6	L8000-04	in 10mM DMSO	Dopamine Receptor	Neuronal Signaling	Quetiapine Fumarate (ICI-204636) is an atypical antipsychotic used in the treatment of schizophrenia, bipolar I mania, bipolar II depression, bipolar I depression and shows affinity for various neurotransmitter receptors including serotonin, dopamine, histamine, and adrenergic receptors.	883.09	111974-72-2	36	40.77	<1	N/A	http://selleckchem.com/products/Quetiapine-fumarate(Seroquel).html	C46H54N6O8S2	Fumarate	ICI-204636 fumarate	OCCOCCN1CCN(CC1)C2=NC3=CC=CC=C3SC4=C2C=CC=C4.OCCOCCN5CCN(CC5)C6=NC7=CC=CC=C7SC8=C6C=CC=C8.OC(=O)\C=C\C(O)=O	-0.718	6	2	14
S1764	Rifampin (NSC-113926)	g6	L8000-04	in 10mM DMSO	Antibiotics for Plant Cell Culture,Antineoplastic and Immunosuppressive Antibiotics,DNA/RNA Synthesis,Selection Antibiotics for Transfected Cell	DNA Damage/DNA Repair	Rifampin (NSC-113926, Rimactane, Rifampicin) is a DNA-dependent RNA polymerase inhibitor, used to treat a number of bacterial infections.	822.94	13292-46-1	100	121.52	<1	N/A	http://selleckchem.com/products/Rifampin(Rifadin).html	C43H58N4O12	free base	Rimactane, Rifampicin,NSC-113926	COC1\C=C\OC2(C)OC3=C(C2=O)C4=C(O)C(=C(NC(=O)\C(=C\C=C\C(C)C(O)C(C)C(O)C(C)C(OC(C)=O)C1C)C)C(=C4C(=C3C)O)O)\C=N\N5CCN(C)CC5	3.262	8	6	5
S1768	Cefditoren Pivoxil	h6	L8000-04	in 10mM DMSO	Antibiotics,Bacterial	Microbiology	Cefditoren Pivoxil (ME-1207) is a broad-spectrum antibiotic against Gram-negative and Gram-positive bacteria.	620.72	117467-28-4	100	161.1	<1	N/A	http://selleckchem.com/products/Cefditoren-pivoxil.html	C25H28N6O7S3	free base	ME-1207	CO\N=C(/C(=O)NC1C2SCC(=C(N2C1=O)C(=O)OCOC(=O)C(C)(C)C)\C=C/C3=C(C)N=CS3)C4=CSC(=N4)N	1.926	10	2	12
S1770	Sulfadiazine	a7	L8000-04	in 10mM DMSO	Antibiotics	Microbiology	Sulfadiazine is a sulfonamide antibiotic.	250.28	68-35-9	50	199.78	<1	N/A	http://selleckchem.com/products/Sulfadiazine.html	C10H10N4O2S	free base	N/A	NC1=CC=C(C=C1)[S](=O)(=O)NC2=NC=CC=N2	0.313	4	2	3
S1771	Chlorprothixene	b7	L8000-04	in 10mM DMSO	Dopamine Receptor	Neuronal Signaling	Chlorprothixene(Minithixen,Truxal) has strong binding affinities to dopamine and histamine receptors, such as D1, D2, D3, D5, H1, 5-HT2, 5-HT6 and 5-HT7, with Ki of 18 nM, 2.96 nM, 4.56 nM, 9 nM, 3.75 nM, 9.4 nM, 3 nM and 5.6 nM, respectively.	315.86	113-59-7	6	19	<1	N/A	http://selleckchem.com/products/Chlorprothixene.html	C18H18ClNS	free base	Minithixen,Truxal	CN(C)CC/C=C1/C2=CC=CC=C2SC3=C1C=C(Cl)C=C3	5.123	0	0	3
S1774	Thioguanine (NSC 752)	c7	L8000-04	in 10mM DMSO	DNA Methyltransferase	Epigenetics	Thioguanine (NSC 752, 6-Thioguanine, 2-Amino-6-purinethiol), a purine antimetabolite, inhibits DNMT1 activity through ubiquitin-targeted degradation, used in the treatment of acute lymphoblastic leukemia, autoimmune disorders (e.g., Crohn's disease, rheumatoid arthritis) and organ transplant recipients.	167.19	154-42-7	9	53.83	<1	N/A	http://selleckchem.com/products/Thioguanine.html	C5H5N5S	free base	NSC 752,6-Thioguanine, 2-Amino-6-purinethiol	NC1=NC(=S)C2=C(N1)N=C[NH]2	0.236	2	3	0
S1775	Thiotepa	d7	L8000-04	in 10mM DMSO	Antineoplastic and Immunosuppressive Antibiotics	Others	Thiotepa (Thioplex, Tiofosyl, Tiofosfamid, Triethylenethiophosphoramide) is an alkylating agent used to treat cancer.	189.22	52-24-4	100	528.49	100	528.49	http://selleckchem.com/products/thiotepa-thioplex.html	C6H12N3PS	free base	Tiofosyl, Tiofosfamid, Triethylenethiophosphoramide	S=[P](N1CC1)(N2CC2)N3CC3	-0.762	0	0	3
S1776	Toremifene Citrate (NK 622)	e7	L8000-04	in 10mM DMSO	Estrogen/progestogen Receptor	Endocrinology & Hormones	Toremifene Citrate (NK 622, NSC 613680) is an oral selective estrogen receptor modulator (SERM), used in the treatment of advanced breast cancer.	598.08	89778-27-8	100	167.2	<1	N/A	http://selleckchem.com/products/Toremifene-Citrate(Fareston).html	C32H36ClNO8	Citrate	NSC 613680,NK 622 Citrate	CN(C)CCOC1=CC=C(C=C1)\C(=C(CCCl)/C2=CC=CC=C2)C3=CC=CC=C3.OC(=O)CC(O)(CC(O)=O)C(O)=O	1.945	4	0	14
S1777	Ethionamide	f7	L8000-04	in 10mM DMSO	Antibiotics	Microbiology	Ethionamide (Bayer 5312) is an antibiotic used in the treatment of tuberculosis.	166.24	536-33-4	33	198.51	<1	N/A	http://selleckchem.com/products/Ethionamide.html	C8H10N2S	free base	Bayer 5312	CCC1=NC=CC(=C1)C(N)=S	1.498	1	1	2
S1778	Trifluridine (NSC 75520)	g7	L8000-04	in 10mM DMSO	DNA/RNA Synthesis,Thymidylate Synthase	DNA Damage/DNA Repair	Trifluridine (NSC 529182, NSC 75520, Viroptic, Trifluorothymidine, TFT) is an anti-herpesvirus antiviral agent by interacting viral DNA replication, used primarily on the eye.	296.2	70-00-8	59	199.19	59	199.19	http://selleckchem.com/products/Trifluridine(Viroptic).html	C10H11F3N2O5	free base	NSC 529182, NSC 75520, Viroptic, Trifluorothymidine, TFT	OCC1OC(CC1O)N2C=C(C(=O)NC2=O)C(F)(F)F	-0.782	3	3	3
S1782	Azacitidine (5-Azacytidine)	h7	L8000-04	in 10mM DMSO	Autophagy,DNA Methyltransferase,Nucleoside Analog/Antimetabolite	DNA Damage/DNA Repair	Azacitidine (5-Azacytidine, 5-AzaC, Ladakamycin, AZA, 5-Aza, CC-486,NSC 102816) is a nucleoside analogue of cytidine that specifically inhibits DNA methylation by trapping DNA methyltransferases. Azacitidine induces mitochondrial apoptosis and autophagy.	244.2	320-67-2	48	196.56	<1	N/A	http://selleckchem.com/products/Azacitidine(Vidaza).html	C8H12N4O5	free base	5-AzaC,Ladakamycin, AZA,5-Aza, CC-486,NSC 102816,5-Azacytidine	NC1=NC(=O)N(C=N1)C2OC(CO)C(O)C2O	-2.505	4	4	2
S1784	Vidarabine	a8	L8000-04	in 10mM DMSO	DNA/RNA Synthesis	DNA Damage/DNA Repair	Vidarabine is an antiviral drug by interfering with the synthesis of viral DNA, used to treat herpes simplex and varicella zoster viruses.	267.24	5536-17-4	53	198.32	3	11.23	http://selleckchem.com/products/Vidarabine(Vira-A).html	C10H13N5O4	free base	N/A	NC1=C2N=C[N](C3OC(CO)C(O)C3O)C2=NC=N1	-1.881	4	4	2
S1786	Verteporfin (CL 318952)	b8	L8000-04	in 10mM DMSO	Apoptosis related,Autophagy,TEAD,VDA,YAP	Angiogenesis	Verteporfin (CL 318952, Visudyne) is a small molecule that inhibits TEAD–YAP association and YAP-induced liver overgrowth. It is also a potent second-generation photosensitizing agent derived from porphyrin. Verteporfin is an autophagy inhibitor. Verteporfin inhibits cell proliferation and induces apoptosis.	718.79	129497-78-5	100	139.12	<1	N/A	http://selleckchem.com/products/Verteporfin(Visudyne).html	C41H42N4O8	free base	CL 318952, Visudyne	COC(=O)CCC1=C(C)C2=CC3=NC(=CC4=C(C)C(=C([NH]4)C=C5N=C(C=C1[NH]2)C(=C5C)CCC(O)=O)C=C)C6=CC=C(C(C(=O)OC)C36C)C(=O)OC	7.789	9	2	12
S1787	Teniposide	c8	L8000-04	in 10mM DMSO	Topoisomerase	DNA Damage/DNA Repair	Teniposide (NSC 122819, VM-26) is a chemotherapeutic medication mainly used in the treatment of childhood acute lymphocytic leukemia (ALL).	656.65	29767-20-2	40	60.92	<1	N/A	http://selleckchem.com/products/Teniposide(Vumon).html	C32H32O13S	free base	NSC 122819, VM-26	COC1=CC(=CC(=C1O)OC)C2C3C(COC3=O)C(OC4OC5COC(OC5C(O)C4O)C6=CC=CS6)C7=CC8=C(OCO8)C=C27	2.516	10	3	6
S1790	Rifaximin	d8	L8000-04	in 10mM DMSO	DNA/RNA Synthesis	DNA Damage/DNA Repair	Rifaximin is a RNA synthesis inhibitor by binding the β subunit of the bacterial DNA-dependent RNA polymerase, used to treat traveler's diarrhea caused by certain bacteria.	785.88	80621-81-4	47	59.81	<1	N/A	http://selleckchem.com/products/Rifaximin(Xifaxan).html	C43H51N3O11	free base	N/A	COC1\C=C\OC2(C)OC3=C(C2=O)C4=C(C(=C3C)O)C(=C(NC(=O)\C(=C/C=C/C(C)C(O)C(C)C(O)C(C)C(OC(C)=O)C1C)C)C5=C4N=C6C=C(C)C=C[N]56)O	4.805	8	5	3
S1792	Simvastatin (MK 733)	e8	L8000-04	in 10mM DMSO	Apoptosis related,Autophagy,Ferroptosis,HMG-CoA Reductase,Mitophagy	Metabolism	Simvastatin (MK-0733, MK 733) is a competitive inhibitor of HMG-CoA reductase with Ki of 0.1-0.2 nM in cell-free assays. Simvastatin induces ferroptosis, mitophagy, autophagy and apoptosis.	418.57	79902-63-9	83	198.29	<1	N/A	http://selleckchem.com/products/Simvastatin(Zocor).html	C25H38O5	free base	MK-0733, MK 733	CCC(C)(C)C(=O)OC1CC(C)C=C2C=CC(C)C(CCC3CC(O)CC(=O)O3)C12	4.634	4	1	7
S1793	Ramipril	f8	L8000-04	in 10mM DMSO	ACE,RAAS	Endocrinology & Hormones	Ramipril(HOE-498) is an angiotensin-converting enzyme (ACE) inhibitor with IC50 of 5 nM.	416.51	87333-19-5	83	199.27	<1	N/A	http://selleckchem.com/products/Ramipril(Altace).html	C23H32N2O5	free base	HOE-498	CCOC(=O)C(CCC1=CC=CC=C1)NC(C)C(=O)N2C3CCCC3CC2C(O)=O	0.308	4	1	10
S1794	Fenofibrate (NSC-281319)	g8	L8000-04	in 10mM DMSO	Autophagy,P450 (e.g. CYP17),PPAR	Metabolism	Fenofibrate (NSC-281319) is a compound of the fibrate class and fibric acid derivative. Fenofibrate is a selective agonist of PPARα with EC50 of 30 μM. Fenofibrate binds to and inhibits cytochrome P450 epoxygenase (CYP)2C with IC50 of 0.2 μM, 0.7 μM and 9.7 μM for CYP2C19, CYP2B6 and CYP2C9, respectively. Fenofibrate induces autophagy.	360.83	49562-28-9	72	199.54	<1	N/A	http://selleckchem.com/products/Fenofibrate(Tricor).html	C20H21ClO4	free base	NSC-281319	CC(C)OC(=O)C(C)(C)OC1=CC=C(C=C1)C(=O)C2=CC=C(Cl)C=C2	5.111	4	0	7
S1799	Ranolazine	h8	L8000-04	in 10mM DMSO	Calcium Channel	Transmembrane Transporters	Ranolazine (CVT 303, RS 43285-003) is a calcium uptake inhibitor via the sodium/calcium channel, used to treat chronic angina.	427.54	95635-55-5	86	201.15	<1	N/A	http://selleckchem.com/products/Ranolazine(Ranexa).html	C24H33N3O4	Free Base	CVT 303, RS 43285-003	COC1=CC=CC=C1OCC(O)CN2CCN(CC2)CC(=O)NC3=C(C)C=CC=C3C	2.991	3	2	9
S1801	Ranitidine Hydrochloride	a9	L8000-04	in 10mM DMSO	Histamine Receptor	Neuronal Signaling	Ranitidine (AH19065) is a histamine H2-receptor antagonist, used to treat stomach or intestinal ulcers.	350.86	66357-59-3	70	199.51	70	199.51	http://selleckchem.com/products/Ranitidine-hydrochloride(Zantac).html	C13H22N4O3S.HCl	Hydrochloride	AH19065	Cl.CNC(/NCCSCC1=CC=C(CN(C)C)O1)=C\[N+]([O-])=O	1.421	1	2	10
S1805	Acetylcholine Chloride	b9	L8000-04	in 10mM DMSO	AChR	Neuronal Signaling	The chemical compound Acetylcholine Chloride(ACh chloride) is a neurotransmitter in both the peripheral nervous system (PNS) and central nervous system (CNS) in many organisms including humans.	181.66	60-31-1	36	198.17	36	198.17	http://www.selleck.cn/products/Acetylcholine-chloride.html	C7H16NO2.Cl	Chloride	ACh chloride	[Cl-].CC(=O)OCC[N+](C)(C)C	-3.869	2	0	4
S1806	Acipimox	c9	L8000-04	in 10mM DMSO	Others	Others	Acipimox (Olbemox,K-9321) is a niacin derivative used as a hypolipidemic agent.	154.12	51037-30-0	31	201.14	<1	N/A	http://selleckchem.com/products/Acipimox.html	C6H6N2O3	free base	Olbemox,K-9321	CC1=CN=C(C=[N+]1[O-])C(O)=O	-0.975	2	0	1
S1808	Nifedipine (BAY-a-1040)	d9	L8000-04	in 10mM DMSO	Calcium Channel	Transmembrane Transporters	Nifedipine (BAY-a-1040) is a dihydropyridine calcium channel blocker, used to lower hypertension and to treat angina.	346.33	21829-25-4	69	199.23	<1	N/A	http://selleckchem.com/products/Nifedipine(Adalat).html	C17H18N2O6	free base	BAY-a-1040	COC(=O)C1=C(C)NC(=C(C1C2=C(C=CC=C2)[N+]([O-])=O)C(=O)OC)C	1.766	4	1	6
S1811	Amiloride (MK-870) HCl	e9	L8000-04	in 10mM DMSO	Calcium Channel,Serine Protease,Sodium Channel	Transmembrane Transporters	Amiloride (MK-870 HCl) is a selective T-type calcium channel blocker, an epithelial sodium channel blocker and a selective inhibitor of urokinase plasminogen activator (uPA)(Ki=7 μM).	266.09	2016-88-8	53	199.18	6	22.55	http://selleckchem.com/products/Amiloride-hydrochloride(Midamor).html	C6H8ClN7O.HCl	Hydrochloride	MK-870 HCl	Cl.NC(=N)NC(=O)C1=NC(=C(N)N=C1N)Cl	-0.366	3	4	2
S1816	Chlorpheniramine Maleate	f9	L8000-04	in 10mM DMSO	Histamine Receptor	Neuronal Signaling	Chlorpheniramine Maleate (Chlorpheniramine maleate, Chlorphenamine, NCI-C55265) is an histamine H1 receptor antagonist with IC50 of 12 nM.	390.86	113-92-8	78	199.56	78	199.56	http://selleckchem.com/products/Chlorpheniramine-maleate.html	C16H19ClN2.C4H4O4	Maleate	NCI-C55265	CN(C)CCC(C1=CC=C(Cl)C=C1)C2=NC=CC=C2.OC(=O)\C=C/C(O)=O	0.7	3	0	7
S1820	Clofibrate	g9	L8000-04	in 10mM DMSO	Others	Others	Clofibrate (Atromid-S), a fibric acid derivative used in the treatment of hyperlipoproteinemia type III and severe hypertriglyceridemia.	242.7	637-07-0	7	28.84	<1	N/A	http://www.selleck.cn/products/Clofibrate(Atromid-S).html	C12H15ClO3	Free Base	N/A	CCOC(=O)C(C)(C)OC1=CC=C(Cl)C=C1	3.329	3	0	5
S1827	Betaxolol HCl	h9	L8000-04	in 10mM DMSO	Adrenergic Receptor	Neuronal Signaling	Betaxolol (SL 75212) is a β1 adrenergic receptor blocker with IC50 of 6 μM.	343.89	63659-19-8	69	200.65	69	200.65	http://selleckchem.com/products/betaxolol-hydrochloride-betoptic.html	C18H29NO3.HCl	Hydrochloride	SL 75212 HCl	Cl.CC(C)NCC(O)COC1=CC=C(CCOCC2CC2)C=C1	2.959	2	2	11
S1828	Proparacaine HCl	a10	L8000-04	in 10mM DMSO	Sodium Channel	Transmembrane Transporters	Proparacaine HCl(Proxymetacaine Hydrochloride) is a voltage-gated sodium channels antagonist with ED50 of 3.4 mM.	330.85	5875-06-9	12	36.27	66	199.49	http://selleckchem.com/products/proparacaine-hcl.html	C16H26N2O3.HCl	Hydrochloride	Proxymetacaine Hydrochloride	Cl.CCCOC1=C(N)C=C(C=C1)C(=O)OCCN(CC)CC	3.013	3	1	10
S1829	Pranlukast	b10	L8000-04	in 10mM DMSO	Immunology & Inflammation related	Immunology & Inflammation	Pranlukast (ONO-1078,ono-rs-411) is an orally administered, and selective antagonist of the cysteinyl leukotrienes (LT) C(4), LTD(4) and LTE(4), used in the prophylactic treatment of chronic bronchial asthma.	481.5	103177-37-3	11	22.85	<1	N/A	http://selleckchem.com/products/pranlukast.html	C27H23N5O4	free base	ONO-1078,ono-rs-411	O=C(NC1=CC2=C(C=C1)C(=O)C=C(O2)C3=NN=N[NH]3)C4=CC=C(OCCCCC5=CC=CC=C5)C=C4	4.232	7	2	9
S1830	Oxfendazole	c10	L8000-04	in 10mM DMSO	Parasite	Microbiology	Oxfendazole (RS-8858,Fenbendazole sulfoxide) is a broad spectrum benzimidazole anthelmintic.	315.35	53716-50-0	10	31.71	<1	N/A	http://selleckchem.com/products/oxfendazole.html	C15H13N3O3S	free base	RS-8858,Fenbendazole sulfoxide	COC(=O)NC1=NC2=C([NH]1)C=C(C=C2)[S](=O)C3=CC=CC=C3	2.657	4	2	4
S1831	Carvedilol	d10	L8000-04	in 10mM DMSO	Adrenergic Receptor	Neuronal Signaling	Carvedilol (BM-14190, SKF 105517) is a non-selective beta blocker/alpha-1 blocker, used to treat congestive heart failure (CHF) and high blood pressure.	406.47	72956-09-3	81	199.28	<1	N/A	http://selleckchem.com/products/carvedilol.html	C24H26N2O4	free base	BM-14190, SKF 105517	COC1=CC=CC=C1OCCNCC(O)COC2=C3C(=CC=C2)[NH]C4=C3C=CC=C4	4.014	3	3	10
S1833	Butoconazole nitrate	e10	L8000-04	in 10mM DMSO	Fungal,IFN,Interleukins,TNF-alpha	Microbiology	Butoconazole nitrate (RS-35887) is an anti-fungal agent that inhibits PHA-stimulated release of cytokines-- IL-2, TNFα, IFN and GM-CSF from human peripheral blood lymphocytes (IC50 of 7.2 μg/mL, 14.4 μg/mL, 7.36 μg/mL and 7.6 μg/mL, respectively).	474.79	64872-77-1	95	200.09	<1	N/A	http://selleckchem.com/products/butoconazole-nitrate.html	C19H17Cl3N2S.HNO3	Nitrate	RS-35887	O[N+]([O-])=O.ClC1=CC=C(CCC(C[N]2C=CN=C2)SC3=C(Cl)C=CC=C3Cl)C=C1	5.238	1	0	7
S1835	Azithromycin (CP-62993)	f10	L8000-04	in 10mM DMSO	Antibiotics,Antibiotics for Mammalian Cell Culture,Autophagy,Bacterial,COVID-19	Autophagy	Azithromycin (CP-62993, XZ-450) is an antibiotic by inhibiting protein synthesis, used for the treatment of bacterial infections.	748.98	83905-01-5	100	133.51	<1	N/A	http://selleckchem.com/products/azithromycin-zithromax.html	C38H72N2O12	Free Base	XZ-450,CP-62993	CCC1OC(=O)C(C)C(OC2CC(C)(OC)C(O)C(C)O2)C(C)C(OC3OC(C)CC(C3O)N(C)C)C(C)(O)CC(C)CN(C)C(C)C(O)C1(C)O	2.078	7	3	7
S1839	Chloroxine	g10	L8000-04	in 10mM DMSO	Bacterial	Microbiology	Chloroxine is a synthetic antibacterial compound that is effective in the treatment of dandruff and seborrheic dermatitis when incorporated in a shampoo.	214.05	773-76-2	43	200.89	<1	N/A	http://selleckchem.com/products/Chloroxine.html	C9H5Cl2NO	free base	N/A	OC1=C(Cl)C=C(Cl)C2=C1N=CC=C2	3.103	1	1	0
S1840	Lomustine	h10	L8000-04	in 10mM DMSO	DNA/RNA Synthesis	DNA Damage/DNA Repair	Lomustine (NSC79037, Gleostine, CeeNU, CCNU) inhibits cancer cells by damaging the DNA and stops cells from dividing.	233.7	13010-47-4	46	196.83	<1	N/A	http://selleckchem.com/products/Lomustine(CeeNU).html	C9H16ClN3O2	free base	NSC79037, Gleostine, CeeNU, CCNU	ClCCN(N=O)C(=O)NC1CCCCC1	2.394	2	1	4
S1845	Cimetidine	a11	L8000-04	in 10mM DMSO	Histamine Receptor	Neuronal Signaling	Cimetidine (SKF-92334), a histamine congener, competitively inhibits histamine binding to histamine H2 receptors.	252.34	51481-61-9	51	202.11	<1	N/A	http://selleckchem.com/products/Cimetidine(Tagamet).html	C10H16N6S	free base	SKF-92334	CNC(NCCSCC1=C(C)[NH]C=N1)=NC#N	0.007	2	3	7
S1847	Clemastine (HS-592) fumarate	b11	L8000-04	in 10mM DMSO	Autophagy,Histamine Receptor,mTOR	Neuronal Signaling	Clemastine Fumarate (HS-592, Meclastine) is a selective histamine H1 receptor antagonist with IC50 of 3 nM. Clemastine stimulates autophagy via mTOR pathway.	459.96	14976-57-9	35	76.09	<1	N/A	http://selleckchem.com/products/Clemastine-Fumarate.html	C21H26ClNO.C4H4O4	Fumarate	HS-592 fumarate, Meclastine fumarate	CN1CCCC1CCOC(C)(C2=CC=CC=C2)C3=CC=C(Cl)C=C3.OC(=O)\C=C\C(O)=O	1.81	3	0	8
S1848	Curcumin	c11	L8000-04	in 10mM DMSO	Apoptosis related,Autophagy,Epigenetic Reader Domain,Ferroptosis,HCV,HDAC,Histone Acetyltransferase,HIV,Influenza Virus,NF-κB,Nrf2	Epigenetics	Curcumin (Diferuloylmethane, Natural Yellow 3, Turmeric yellow) is the principal curcuminoid of the popular Indian spice turmeric, which is a member of the ginger family (Zingiberaceae). It is an inhibitor of p300 histone acetylatransferase（IC50~25 μM）and Histone deacetylase (HDAC); activates Nrf2 pathway and supresses the activation of NF-κB. Curcumin induces mitophagy, autophagy, apoptosis, and…	368.38	458-37-7	73	198.16	<1	N/A	http://selleckchem.com/products/Curcumin.html	C21H20O6	free base	Diferuloylmethane, Natural Yellow 3, Turmeric yellow	COC1=CC(=CC=C1O)/C=C/C(O)=C/C(=O)/C=C/C2=CC(=C(O)C=C2)OC	3.573	3	3	7
S1849	Daidzein	d11	L8000-04	in 10mM DMSO	PPAR	Metabolism	Daidzein is a natural isoflavone phytoestrogen found in Leguminosae, used as a component of foods and dietary supplements. Daidzein is a soy isoflavone, which acts as a PPAR activator.	254.24	486-66-8	51	200.6	<1	N/A	http://selleckchem.com/products/Daidzein.html	C15H10O4	free base	N/A	OC1=CC=C(C=C1)C2=COC3=CC(=CC=C3C2=O)O	2.382	2	2	1
S1854	Bifonazole	e11	L8000-04	in 10mM DMSO	Fungal	Microbiology	Bifonazole (Bay h 4502,(±)-bifonazole) is a substituted imidazole antifungal agent.	310.39	60628-96-8	62	199.75	<1	N/A	http://selleckchem.com/products/bifonazole.html	C22H18N2	free base	Bay h 4502,(±)-bifonazole	C1=CC=C(C=C1)C([N]2C=CN=C2)C3=CC=C(C=C3)C4=CC=CC=C4	4.637	1	0	4
S1855	Pefloxacin Mesylate	f11	L8000-04	in 10mM DMSO	Bacterial	Microbiology	Pefloxacin Mesylate(Pefloxacinium mesylate) is a synthetic chemotherapeutic agent and an antibacterial agent with IC50 of 6.7 nM.	429.46	70458-95-6	14	32.6	67	156.01	http://selleckchem.com/products/pefloxacin-mesylate.html	C17H20FN3O3.CH4O3S	Mesylate	Pefloxacinium mesylate	CCN1C=C(C(O)=O)C(=O)C2=CC(=C(C=C12)N3CCN(C)CC3)F.C[S](O)(=O)=O	-1.618	2	0	3
S1856	Metoprolol Tartrate	g11	L8000-04	in 10mM DMSO	Adrenergic Receptor	Neuronal Signaling	Metoprolol Tartrate (CGP 2175E) is a selective β1 receptor blocker medication, used to treat hypertension and heart failure.	684.81	56392-17-7	100	146.03	100	146.03	http://selleckchem.com/products/metoprolol-tartrate.html	2C15H25NO3.C4H6O6	Tartrate	CGP 2175E	COCCC1=CC=C(OCC(O)CNC(C)C)C=C1.COCCC2=CC=C(OCC(O)CNC(C)C)C=C2.OC(C(O)C(O)=O)C(O)=O	-3.559	6	6	21
S1858	Dienestrol	h11	L8000-04	in 10mM DMSO	Estrogen/progestogen Receptor	Endocrinology & Hormones	Dienestrol(Restrol) is a synthetic, non-steroidal estrogen. It is an estrogen receptor agonist.	266.33	84-17-3	53	199	-1	N/A	http://www.selleckchem.com/products/Dienestrol(Restrol).html	C18H18O2	Free Base	Restrol	C/C=C(C1=CC=C(O)C=C1)/C(=C/C)C2=CC=C(O)C=C2	4.692	0	2	3
S1859	Diethylstilbestrol	a2	L8000-05	in 10mM DMSO	Estrogen/progestogen Receptor	Endocrinology & Hormones	Diethylstilbestrol (Stilbestrol) is a synthetic nonsteroidal estrogen, used to prevent miscarriage and other pregnancy complications.	268.35	56-53-1	54	201.23	<1	N/A	http://selleckchem.com/products/Diethylstilbestrol(Stilbestrol).html	C18H20O2	free base	Stilbestrol	CCC(/C1=CC=C(O)C=C1)=C(CC)\C2=CC=C(O)C=C2	5.137	0	2	4
S1869	Dapoxetine HCl	b2	L8000-05	in 10mM DMSO	5-HT Receptor,Serotonin Transporter	Neuronal Signaling	Dapoxetine HCl (LY-210448) is a short-acting novel selective serotonin reuptake inhibitor, used for the treatment of premature ejaculation.	341.87	129938-20-1	68	198.91	68	198.91	http://selleckchem.com/products/Dapoxetine-hydrochloride(Priligy).html	C21H23NO.HCl	Hydrochloride	LY-210448	Cl.CN(C)C(CCOC1=C2C=CC=CC2=CC=C1)C3=CC=CC=C3	4.917	1	0	6
S1878	Ganciclovir (BW 759)	c2	L8000-05	in 10mM DMSO	CMV	Microbiology	Ganciclovir (RS-21592, BW-759, 2'-Nor-2'-deoxyguanosine) is an antiviral drug for feline herpesvirus type-1 with IC50 of 5.2 μM in a cell-free assay.	255.23	82410-32-0	27	105.79	<1	N/A	http://selleckchem.com/products/ganciclovir.html	C9H13N5O4	free base	RS-21592, BW-759, 2'-Nor-2'-deoxyguanosine	NC1=NC2=C(N=C[N]2COC(CO)CO)C(=O)N1	-1.934	4	4	5
S1880	Roxatidine Acetate HCl	d2	L8000-05	in 10mM DMSO	Histamine Receptor	Neuronal Signaling	Roxatidine Acetate HCl(HOE 760) is a specific and competitive histamin H2-receptor antagonist, with IC50 of 3.2 μM, inhibits gastric acid secretion and ulcer formation.	384.9	93793-83-0	77	200.05	77	200.05	http://selleckchem.com/products/roxatidine-acetate-hcl.html	C19H28N2O4.HCl	Hydrochloride	HOE 760	Cl.CC(=O)OCC(=O)NCCCOC1=CC=CC(=C1)CN2CCCCC2	2.148	4	1	10
S1883	Idoxuridine	e2	L8000-05	in 10mM DMSO	Antiviral	Microbiology	Idoxuridine (NSC 39661, SKF 14287,5-Iodo-2′-deoxyuridine,5-IUdR,IdUrd) is an antiviral agent for feline herpesvirus type-1 with IC50 of 4.3 μM.	354.1	54-42-2	35	98.84	<1	N/A	http://selleckchem.com/products/idoxuridine.html	C9H11IN2O5	free base	NSC 39661, SKF 14287,5-Iodo-2′-deoxyuridine,5-IUdR,IdUrd	OCC1OC(CC1O)N2C=C(I)C(=O)NC2=O	-1.402	3	3	2
S1884	Sparfloxacin	f2	L8000-05	in 10mM DMSO	Antibiotics,Bacterial	Microbiology	Sparfloxacin (AT-4140, CI-978, PD 131501,Zagam) is a fluoroquinolone antibiotic, shows broad and potent antibacterial activity.	392.4	110871-86-8	9	22.94	<1	N/A	http://selleckchem.com/products/sparfloxacin.html	C19H22F2N4O3	free base	AT-4140, CI-978, PD 131501,Zagam	CC1CN(CC(C)N1)C2=C(F)C3=C(C(=C2F)N)C(=O)C(=CN3C4CC4)C(O)=O	-1.056	2	2	3
S1888	Deflazacort	g2	L8000-05	in 10mM DMSO	Glucocorticoid Receptor	Endocrinology & Hormones	Deflazacort (MDL 458) is a glucocorticoid used as an anti-inflammatory and immunosuppressant.	441.52	14484-47-0	88	199.31	<1	N/A	http://selleckchem.com/products/Deflazacor.html	C25H31NO6	free base	MDL 458	CC(=O)OCC(=O)C12N=C(C)OC1CC3C4CCC5=CC(=O)C=CC5(C)C4C(O)CC23C	1.67	6	1	4
S1890	Nizatidine	h2	L8000-05	in 10mM DMSO	Histamine Receptor	Neuronal Signaling	Nizatidine is a histamine H2 receptor antagonist with IC50 of 0.9 nM, also inhibits AChE with IC50 of 6.7 μM.	331.46	76963-41-2	66	199.12	28	84.47	http://selleckchem.com/products/Nizatidine(Axid).html	C12H21N5O2S2	free base	N/A	CNC(/NCCSCC1=CSC(=N1)CN(C)C)=C/[N+]([O-])=O	0.643	1	2	10
S1894	Valsartan (CGP-48933)	a3	L8000-05	in 10mM DMSO	Angiotensin Receptor	GPCR & G Protein	Valsartan (CGP-48933) is a selective angiotensin II receptor antagonist, used to treat high blood pressure and congestive heart failure.	435.52	137862-53-4	87	199.76	<1	N/A	http://selleckchem.com/products/Valsartan(Diovan).html	C24H29N5O3	free base	CGP-48933	CCCCC(=O)N(CC1=CC=C(C=C1)C2=CC=CC=C2C3=N[NH]N=N3)C(C(C)C)C(O)=O	4.538	5	1	10
S1895	Dipyridamole (NSC 515776)	b3	L8000-05	in 10mM DMSO	PDE	Metabolism	Dipyridamole (NSC-515776, Persantine) is a phosphodiesterase inhibitor that blocks uptake and metabolism of adenosine by erythrocytes and vascular endothelial cells.	504.63	58-32-2	101	200.15	<1	N/A	http://selleckchem.com/products/Dipyridamole(Permole,-Persantine).html	C24H40N8O4	free base	Persantine,NSC-515776	OCCN(CCO)C1=NC2=C(N=C(N=C2N3CCCCC3)N(CCO)CCO)C(=N1)N4CCCCC4	2.483	4	4	12
S1896	Hydroxyurea (NSC-32065)	c3	L8000-05	in 10mM DMSO	Apoptosis related,Autophagy,DNA/RNA Synthesis,HIV	DNA Damage/DNA Repair	Hydroxyurea (NSC-32065, NCI-C04831, Hydroxycarbamide) is an antineoplastic agent that inhibits DNA synthesis through the inhibition of ribonucleoside diphosphate reductase. Hydroxyurea activates apoptosis and autophagy. Hydroxyurea is used to treat HIV infection.	76.05	127-07-1	15	197.24	15	197.24	http://selleckchem.com/products/Hydroxyurea(Cytodrox).html	CH4N2O2	free base	NCI-C04831, Hydroxycarbamide,NSC-32065	NC(=O)NO	-1.03	1	2	0
S1899	Nicotinamide (NSC 13128)	d3	L8000-05	in 10mM DMSO	Sirtuin	DNA Damage/DNA Repair	Nicotinamide (Niacinamide, Vitamin PP, Nicotinic acid amide, Vitamin B3, NSC 27452,NSC 13128), a water-soluble vitamin, is an active component of coenzymes NAD and NADP, and also act as an inhibitor of sirtuins.	122.12	98-92-0	24	196.53	24	196.53	http://selleckchem.com/products/Nicotinamide(Niacinamide).html	C6H6N2O	free base	Niacinamide, Vitamin PP, Nicotinic acid amide, Vitamin B3, NSC 27452,NSC 13128	NC(=O)C1=CC=CN=C1	-0.319	2	1	1
S1903	Diclofenac Sodium	e3	L8000-05	in 10mM DMSO	COX	Neuronal Signaling	Diclofenac Sodium (GP 45840) is a non-selective COX inhibitor with IC50 of 0.5 μg/ml and 0.5 μg/ml for COX-1 and -2 in intact cells, respectively, used as a nonsteroidal anti-inflammatory drug (NSAID) to relieve pain and reduce swelling in flammation.	318.13	15307-79-6	64	201.18	14	44.01	http://selleckchem.com/products/Diclofenac-sodium.html	C14H10Cl2NNaO2	Sodium Salt	GP 45840	[Na+].[O-]C(=O)CC1=C(NC2=C(Cl)C=CC=C2Cl)C=CC=C1	2.899	0	1	4
S1907	Metronidazole	f3	L8000-05	in 10mM DMSO	Antineoplastic and Immunosuppressive Antibiotics,DNA/RNA Synthesis	DNA Damage/DNA Repair	Metronidazole, a synthetic antibacterial and antiprotozoal agent of the nitroimidazole class, is used against protozoa.	171.15	443-48-1	34	198.66	<1	N/A	http://selleckchem.com/products/Metronidazole(Flagyl).html	C6H9N3O3	free base	N/A	CC1=NC=C([N]1CCO)[N+]([O-])=O	-0.337	1	1	3
S1908	Flutamide	g3	L8000-05	in 10mM DMSO	Androgen Receptor	Endocrinology & Hormones	Flutamide (SCH-13521) is an antiandrogen drug, with its active metablolite binding at androgen receptor with Ki values of 55 nM, and primarily used to treat prostate cancer.	276.21	13311-84-7	55	199.12	<1	N/A	http://selleckchem.com/products/Flutamide(Eulexin).html	C11H11F3N2O3	free base	SCH-13521	CC(C)C(=O)NC1=CC(=C(C=C1)[N+]([O-])=O)C(F)(F)F	2.916	1	1	4
S1909	Fluvastatin (XU-62-320) Sodium	h3	L8000-05	in 10mM DMSO	HMG-CoA Reductase	Metabolism	Fluvastatin Sodium (Vastin,XU-62-320) inhibits HMG-CoA reductase activity with IC50 of 8 nM in a cell-free assay.	433.45	93957-55-2	87	200.72	1	2.31	http://selleckchem.com/products/Fluvastatin-Sodium(Lescol).html	C24H25FNNaO4	Sodium	Vastin,XU-62-320	[Na+].CC(C)[N]1C2=C(C=CC=C2)C(=C1\C=C\C(O)CC(O)CC([O-])=O)C3=CC=C(F)C=C3	2.77	0	2	8
S1910	Tioconazole	a4	L8000-05	in 10mM DMSO	Fungal	Microbiology	Tioconazole (UK-20349) is an antifungal medication with an average IC50 of 1.7 μM.	387.71	65899-73-2	78	201.18	<1	N/A	http://selleckchem.com/products/tioconazole.html	C16H13Cl3N2OS	free base	UK-20349	ClC1=CC=C(C(C[N]2C=CN=C2)OCC3=C(Cl)SC=C3)C(=C1)Cl	4.437	2	0	6
S1913	Tropicamide	b4	L8000-05	in 10mM DMSO	AChR	Neuronal Signaling	Tropicamide(Ro 1-7683) is an anticholinergic and a muscarinic receptor subtype M4-preferring antagonist with IC50 of 8.0 nM.	284.35	1508-75-4	57	200.46	<1	N/A	http://selleckchem.com/products/tropicamide.html	C17H20N2O2	free base	Ro 1-7683	CCN(CC1=CC=NC=C1)C(=O)C(CO)C2=CC=CC=C2	1.432	2	1	6
S1914	Pregnenolone	c4	L8000-05	in 10mM DMSO	Estrogen/progestogen Receptor	Endocrinology & Hormones	Pregnenolone(3β-Hydroxy-5-pregnen-20-one) is an endogenous steroid hormone, used in the treatment of fatigue, Alzheimer’s disease, trauma and injuries.	316.48	145-13-1	22	69.51	<1	N/A	http://selleckchem.com/products/pregnenolone.html	C21H32O2	free base	3β-Hydroxy-5-pregnen-20-one	CC(=O)C1CCC2C3CC=C4CC(O)CCC4(C)C3CCC12C	3.624	1	1	1
S1915	Sulfamethoxazole	d4	L8000-05	in 10mM DMSO	Antibiotics,Bacterial	Microbiology	Sulfamethoxazole(Ro 4-2130) is a sulfonamide bacteriostatic antibiotic with an IC50 of 2.7 μM.	253.28	723-46-6	51	201.36	<1	N/A	http://selleckchem.com/products/Sulfamethoxazole.html	C10H11N3O3S	free base	Ro 4-2130	CC1=CC(=NO1)N[S](=O)(=O)C2=CC=C(N)C=C2	0.709	4	2	3
S1916	Sulfisoxazole	e4	L8000-05	in 10mM DMSO	Bacterial	Microbiology	Sulfisoxazole (NU-445) is a sulfonamide antibacterial with an oxazole substituent.	267.3	127-69-5	53	198.28	<1	N/A	http://selleckchem.com/products/Sulfisoxazole.html	C11H13N3O3S	free base	NU-445	CC1=NOC(=C1C)N[S](=O)(=O)C2=CC=C(N)C=C2	0.918	4	2	3
S1917	Crystal Violet	f4	L8000-05	in 10mM DMSO	Dyes	Others	Crystal violet(Gentian Violet) is a triarylmethane dye.	407.98	548-62-9	82	200.99	14	34.32	http://selleckchem.com/products/Crystal-violet.html	C25H30ClN3	quaternary-N chloride salt	Gentian Violet	[Cl-].CN(C)C1=CC=C(C=C1)C(C2=CC=C(C=C2)N(C)C)=C3C=CC(C=C3)=[N+](C)C	2.25	0	0	4
S1920	Haloperidol	g4	L8000-05	in 10mM DMSO	Dopamine Receptor	Neuronal Signaling	Haloperidol (Haldol) is an antipsychotic and butyrophenone.	375.86	52-86-8	75	199.54	<1	N/A	http://selleckchem.com/products/Haloperidol(Haldol).html	C21H23ClFNO2	free base	N/A	OC1(CCN(CCCC(=O)C2=CC=C(F)C=C2)CC1)C3=CC=C(Cl)C=C3	3.887	1	0	6
S1933	Triamcinolone	h4	L8000-05	in 10mM DMSO	Glucocorticoid Receptor	Endocrinology & Hormones	Triamcinolone is a glucocorticoid given, as the free alcohol or in esterified form, orally, intramuscularly, by local injection, by inhalation, or applied topically in the management of various disorders in which corticosteroids are indicated.	394.43	124-94-7	78	197.75	<1	N/A	http://selleckchem.com/products/Triamcinolone(Aristocort).html	C21H27FO6	free base	N/A	CC12CC(O)C3(F)C(CCC4=CC(=O)C=CC34C)C1CC(O)C2(O)C(=O)CO	0.422	2	3	2
S1934	Nystatin (Fungicidin)	a5	L8000-05	in 10mM DMSO	Antibiotics for Mammalian Cell Culture,Fungal	Microbiology	Nystatin(Fungicidin), which belongs to the polyene group of antimycotics, is frequently used as a topical agent in the treatment of oro-pharyngeal candidosis.	1056.24	62997-67-5	19	17.99	<1	N/A	http://selleckchem.com/products/Nystatin(Mycostatin).html	C53H85NO20	free base	Fungicidin	CC1OC(=O)CC(O)CC(O)CC(O)CCC(O)C(O)CC2(O)CC(O)C(C(CC(OC3OC(C)C(O)C(N)C3O)/C=C/C=C/C=C/C=C/CC/C=C/C=C/C(C)C(O)C1C)O2)C(O)=O	-2.265	8	11	5
S1937	Isoniazid	b5	L8000-05	in 10mM DMSO	Fatty Acid Synthase	Metabolism	Isoniazid is a prodrug that blocks the action of fatty acid synthase by interacting with KatG , used for the prevention and treatment of tuberculosis.	137.14	54-85-3	27	196.88	27	196.88	http://selleckchem.com/products/Isoniazid(Tubizid).html	C6H7N3O	free base	N/A	NNC(=O)C1=CC=NC=C1	-0.811	2	2	1
S1941	Enalapril Maleate	c5	L8000-05	in 10mM DMSO	ACE,RAAS	Endocrinology & Hormones	Enalapril (MK-421) Maleate is an angiotensin-converting enzyme (ACE) inhibitor, used in the treatment of hypertension, diabetic nephropathy, and chronic heart failure.	492.52	76095-16-4	99	201.01	<1	N/A	http://selleckchem.com/products/Enalapril-maleate(Vasotec).html	C20H28N2O5.C4H4O4	Maleate	MK-421 Maleate	CCOC(=O)C(CCC1=CC=CC=C1)NC(C)C(=O)N2CCCC2C(O)=O.OC(=O)\C=C/C(O)=O	-0.502	6	1	12
S1949	Menadione (NSC 4170)	d5	L8000-05	in 10mM DMSO	CDK,DNA/RNA Synthesis,phosphatase	Metabolism	Menadione (NSC 4170, Vitamin K3), a fat-soluble compound, is an inhibitor of Cdc25 phosphatase and mitochondrial DNA polymerase γ (pol γ), used as a nutritional supplement.	172.18	58-27-5	34	197.47	<1	N/A	http://selleckchem.com/products/Menadione.html	C11H8O2	free base	Vitamin K3,NSC 4170	CC1=CC(=O)C2=CC=CC=C2C1=O	2.204	2	0	0
S1950	Metformin HCl	e5	L8000-05	in 10mM DMSO	Autophagy,Carbohydrate Metabolism,JNK,Mitophagy,p38 MAPK	Metabolism	Metformin HCl (1,1-Dimethylbiguanide HCl) decreases hyperglycemia in hepatocytes primarily by suppressing glucose production by the liver (hepatic gluconeogenesis). Metformin promotes mitophagy in mononuclear cells. Metformin induces apoptosis of lung cancer cells through activating JNK/p38 MAPK pathway and GADD153.	165.62	1115-70-4	33	199.25	33	199.25	http://selleckchem.com/products/Metformin-hydrochloride(Glucophage).html	C4H11N5.HCl	Hydrochloride	1,1-Dimethylbiguanide HCl	Cl.CN(C)C(=N)NC(N)=N	-0.36	0	2	3
S1952	Methoxsalen	f5	L8000-05	in 10mM DMSO	P450 (e.g. CYP17)	Metabolism	Methoxsalen (Xanthotoxin, NCI-C55903) is a naturally occurring photoactive substance found in the seeds of the Ammi majus (Umbelliferae) plant, used in the diagnosis and treatment of psoriasis; A CYP2A5/6 inhibitor.	216.19	298-81-7	43	198.9	<1	N/A	http://selleckchem.com/products/Methoxsalen(Oxsoralen).html	C12H8O4	free base	Xanthotoxin, NCI-C55903	COC1=C2OC=CC2=CC3=C1OC(=O)C=C3	2.187	4	0	1
S1957	Sulfamethizole	g5	L8000-05	in 10mM DMSO	Bacterial	Microbiology	Sulfamethizole is a sulfathiazole antibacterial agent.	270.33	144-82-1	54	199.76	<1	N/A	http://selleckchem.com/products/Sulfamethizole(Proklar).html	C9H10N4O2S2	free base	N/A	CC1=NN=C(N[S](=O)(=O)C2=CC=C(N)C=C2)S1	0.305	4	2	3
S1959	Tolfenamic Acid	h5	L8000-05	in 10mM DMSO	COX	Neuronal Signaling	Tolfenamic Acid(Clotam) is a COX-2 inhibitor with IC50 of 0.2 μM.	261.7	13710-19-5	52	198.7	<1	N/A	http://selleckchem.com/products/tolfenamic-acid.html	C14H12ClNO2	free base	Clotam	CC1=C(Cl)C=CC=C1NC2=C(C=CC=C2)C(O)=O	4.16	1	1	3
S1965	Primidone	a6	L8000-05	in 10mM DMSO	Sodium Channel	Transmembrane Transporters	Primidone (NCI-C56360) is an anticonvulsant of the pyrimidinedione class.	218.25	125-33-7	44	201.6	<1	N/A	http://selleckchem.com/products/Primidone(Mysoline).html	C12H14N2O2	free base	NCI-C56360	CCC1(C(=O)NCNC1=O)C2=CC=CC=C2	0.931	2	2	2
S1969	Nefiracetam	b6	L8000-05	in 10mM DMSO	GABA Receptor	Neuronal Signaling	Nefiracetam (DZL 221) is a GABAergic, cholinergic, and monoaminergic neuronal system enhancer for Ro 5-4864-induced convulsions. Phase 2.	246.3	77191-36-7	49	198.94	5	20.3	http://selleckchem.com/products/Nefiracetam(Translon).html	C14H18N2O2	free base	DZL 221	CC1=CC=CC(=C1NC(=O)CN2CCCC2=O)C	1.443	2	1	3
S1971	Nicorandil	c6	L8000-05	in 10mM DMSO	Potassium Channel	Transmembrane Transporters	Nicorandil (SG-75) is a potassium channel activator, and stimulates guanylate cyclase to increase formation of cyclic GMP (cGMP).	211.17	65141-46-0	42	198.89	17	80.5	http://selleckchem.com/products/Nicorandil(Ikorel).html	C8H9N3O4	free base	SG-75	[O-][N+](=O)OCCNC(=O)C1=CC=CN=C1	1.758	3	1	5
S1972	Tamoxifen (ICI 46474) Citrate	d6	L8000-05	in 10mM DMSO	Apoptosis related,Autophagy,Estrogen/progestogen Receptor,HSP (HSP90)	Endocrinology & Hormones	Tamoxifen Citrate (Istubal,ICI 46474 Citrate) is a selective estrogen receptor modulator (SERM). Tamoxifen Citrate is also a potent Hsp90 activator and enhances the Hsp90 molecular chaperone ATPase activity. Tamoxifen induces apoptosis and autophagy.	563.64	54965-24-1	100	177.42	<1	N/A	http://selleckchem.com/products/Tamoxifen-Citrate(Nolvadex).html	C26H29NO.C6H8O7	Citrate	Istubal,ICI 46474 Citrate	CC/C(C1=CC=CC=C1)=C(C2=CC=CC=C2)/C3=CC=C(OCCN(C)C)C=C3.OC(=O)CC(O)(CC(O)=O)C(O)=O	1.966	4	0	13
S1973	Cyclocytidine HCl	e6	L8000-05	in 10mM DMSO	DNA/RNA Synthesis	DNA Damage/DNA Repair	Cyclocytidine (NSC 145668) is the prodrug of cytarabine, which is a pyrimidine nucleoside analog that inhibits the DNA synthesis and used mainly in the treatment of leukemia.	261.66	10212-25-6	10	38.22	44	168.16	http://selleckchem.com/products/cyclocytidine-hcl.html	C9H12ClN3O4	Hydrochloride	NSC 145668 HCl	Cl.OCC1OC2C(OC3=NC(=N)C=CN23)C1O	-1.395	3	2	1
S1975	Aripiprazole	f6	L8000-05	in 10mM DMSO	5-HT Receptor	Neuronal Signaling	Aripiprazole (OPC-14597) is a novel atypical antipsychotic drug that is reported to be a high-affinity 5-HT receptor partial agonist.	448.39	129722-12-9	90	200.72	<1	N/A	http://selleckchem.com/products/aripiprazole-abilify.html	C23H27Cl2N3O2	free base	OPC-14597	ClC1=CC=CC(=C1Cl)N2CCN(CCCCOC3=CC=C4CCC(=O)NC4=C3)CC2	4.998	2	1	7
S1978	Methscopolamine	g6	L8000-05	in 10mM DMSO	AChR	Neuronal Signaling	Methscopolamine is a muscarinic acetylcholine receptor blocker.	398.29	155-41-9	79	198.35	67	168.22	http://selleckchem.com/products/Methscopolamine-bromide(Pamine).html	C18H24BrNO4	quaternary-N bromide salt	N/A	[Br-].C[N+]1(C)C2CC(CC1C3OC23)OC(=O)C(CO)C4=CC=CC=C4	-2.949	3	1	5
S1979	Amiodarone (NSC 85442) HCl	h6	L8000-05	in 10mM DMSO	Autophagy,Potassium Channel	Transmembrane Transporters	Amiodarone (NSC 85442,Amiodar,Amiodarone hydrochloride,Nexterone) HCl is a sodium/potassium-ATPase inhibitor and an autophagy activator, used to treat various types of cardiac dysrhythmias.	681.77	19774-82-4	23	33.74	<1	N/A	http://selleckchem.com/products/amiodarone-hcl.html	C25H29I2NO3.HCl	Hydrochloride	Amiodar,Amiodarone hydrochloride,Nexterone	Cl.CCCCC1=C(C(=O)C2=CC(=C(OCCN(CC)CC)C(=C2)I)I)C3=C(O1)C=CC=C3	7.62	3	0	11
S1990	Capsaicin(Vanilloid)	a7	L8000-05	in 10mM DMSO	TRP Channel	Transmembrane Transporters	Capsaicin (Qutenza, Vanilloid) is an active component of chili peppers, which are plants belonging to the genus Capsicum.Capsaici is a TRPV1 agonist with an EC50 of 0.29 μM in HEK293 cells.	305.41	404-86-4	61	199.73	<1	N/A	http://selleckchem.com/products/capsaicin.html	C18H27NO3	free base	Qutenza, Vanilloid	COC1=C(O)C=CC(=C1)CNC(=O)CCCC\C=C\C(C)C	3.91	2	2	9
S1992	Fluticasone propionate	b7	L8000-05	in 10mM DMSO	Glucocorticoid Receptor	Endocrinology & Hormones	Fluticasone Propionate (CCI-187881) is a synthetic glucocorticoid, used to treat non-allergic and allergic rhinitis.	500.57	80474-14-2	100	199.77	<1	N/A	http://selleckchem.com/products/fluticasone-propionate-Flonase-Veramyst.html	C25H31F3O5S	free base	CCI-187881	CCC(=O)OC1(C(C)CC2C3CC(F)C4=CC(=O)C=CC4(C)C3(F)C(O)CC12C)C(=O)SCF	4.086	4	1	6
S2003	Maraviroc (UK-427857)	c7	L8000-05	in 10mM DMSO	CCR,HIV	Microbiology	Maraviroc (Celsentri,UK-427857) is a CCR5 antagonist for MIP-1α, MIP-1β and RANTES with IC50 of 3.3 nM, 7.2 nM and 5.2 nM in cell-free assays, respectively. Maraviroc is used in the treatment of HIV infection.	513.67	376348-65-1	100	194.68	<1	N/A	http://selleckchem.com/products/Maraviroc.html	C29H41F2N5O	free base	Celsentri,UK-427857	CC(C)C1=NN=C(C)[N]1C2CC3CCC(C2)N3CCC(NC(=O)C4CCC(F)(F)CC4)C5=CC=CC=C5	3.921	3	1	8
S2006	Pyrimethamine	d7	L8000-05	in 10mM DMSO	DHFR	Metabolism	Pyrimethamine(RP 4753) is a dihydrofolate reductase (DHFR) inhibitor, used as an antimalarial drug.	248.71	58-14-0	10	40.21	<1	N/A	http://selleckchem.com/products/Pyrimethamine.html	C12H13ClN4	free base	RP 4753	CCC1=NC(=NC(=C1C2=CC=C(Cl)C=C2)N)N	2.75	2	2	2
S2007	Sulindac	e7	L8000-05	in 10mM DMSO	COX	Neuronal Signaling	Sulindac(MK-231) is a non-steroidal COX inhibitor, which potently inhibits prostaglandin synthesis, used in the treatment of acute or chronic inflammatory conditions.	356.41	38194-50-2	71	199.21	<1	N/A	http://selleckchem.com/products/Sulindac(Clinoril).html	C20H17FO3S	free base	MK-231	CC1=C(CC(O)=O)C2=C(C=CC(=C2)F)\C1=C/C3=CC=C(C=C3)[S](C)=O	3.639	2	0	4
S2015	Suplatast Tosylate	f7	L8000-05	in 10mM DMSO	Interleukins	Immunology & Inflammation	Suplatast Tosylate (IPD-1151T, Suplatast Tosilate) is a novel capsular anti-asthmatic agent that suppresses both IgE production, IL-4 and IL-5 synthesis with IC50 above 100 μM.	499.64	94055-76-2	100	200.14	100	200.14	http://selleckchem.com/products/suplatast-tosilate.html	C23H33NO7S2	Tosylate	IPD-1151T, Suplatast Tosilate	CCOCC(O)COC1=CC=C(NC(=O)CC[S+](C)C)C=C1.CC2=CC=C(C=C2)[S]([O-])(=O)=O	0.877	3	2	11
S2017	Benidipine HCl	g7	L8000-05	in 10mM DMSO	Calcium Channel	Transmembrane Transporters	Benidipine HCl (KW-3049,(±)- Benidipine) is a hydrochloride salt form of benidipine which is a dihydropyridine calcium channel blocker.	542.02	91599-74-5	8	14.76	<1	N/A	http://selleckchem.com/products/benidipine-hydrochloride.html	C28H31N3O6.HCl	Hydrochloride	KW-3049,(±)- Benidipine	Cl.COC(=O)C1=C(C)NC(=C(C1C2=CC(=CC=C2)[N+]([O-])=O)C(=O)OC3CCCN(C3)CC4=CC=CC=C4)C	4.36	4	1	9
S2020	Formoterol Hemifumarate	h7	L8000-05	in 10mM DMSO	Adrenergic Receptor	Neuronal Signaling	Formoterol Hemifumarate (Eformoterol, CGP 25827A, NSC 299587, YM 08316,Formoterol fumarate) is a potent, selective and long-acting β2-adrenoceptor agonist used in the management of asthma and chronic obstructive pulmonary disease(COPD).	402.4	43229-80-7	80	198.81	<1	N/A	http://selleckchem.com/products/formoterol-hemifumarate.html	C19H24N2O4.1/2C4H4O4	Hemifumarate	Eformoterol, CGP 25827A, NSC 299587, YM 08316,Formoterol fumarate	COC1=CC=C(CC(C)NCC(O)C2=CC=C(O)C(=C2)NC=O)C=C1.COC3=CC=C(CC(C)NCC(O)C4=CC=C(O)C(=C4)NC=O)C=C3.OC(=O)\C=C\C(O)=O	-1.526	6	8	18
S2024	Ketotifen Fumarate	a8	L8000-05	in 10mM DMSO	Histamine Receptor	Neuronal Signaling	Ketotifen Fumarate(HC 20511 fumarate) is a fumaric acid salt of ketotifen which is a H1-antihistamine and mast cell stabilizer.	425.5	34580-14-8	8	18.8	<1	N/A	http://selleckchem.com/products/ketotifen-fumarate-zaditor.html	C19H19NOS.C4H4O4	Fumarate	HC 20511 fumarate	CN1CCC(CC1)=C2C3=C(CC(=O)C4=C2C=CS4)C=CC=C3.OC(=O)\C=C\C(O)=O	0.772	3	0	2
S2025	Urapidil HCl	b8	L8000-05	in 10mM DMSO	5-HT Receptor	Neuronal Signaling	Urapidil HCl is a hydrochloride salt form of urapidil which is α1-adrenoceptor antagonist and 5-HT1A receptor agonist with pIC50 of 6.13 and 6.4 respectively.	423.94	64887-14-5	24	56.61	85	200.5	http://selleckchem.com/products/urapidil-hydrochloride.html	C20H29N5O3.HCl	Hydrochloride	N/A	Cl.COC1=CC=CC=C1N2CCN(CCCNC3=CC(=O)N(C)C(=O)N3C)CC2	1.808	3	1	7
S2028	Diclazuril	c8	L8000-05	in 10mM DMSO	Parasite	Microbiology	Diclazuril(R-64433) is an anti-coccidial drug.	407.64	101831-37-2	16	39.25	<1	N/A	http://selleckchem.com/products/diclazuril.html	C17H9Cl3N4O2	free base	R-64433	ClC1=CC=C(C=C1)C(C#N)C2=C(Cl)C=C(C=C2Cl)N3N=CC(=O)NC3=O	4.191	3	1	3
S2029	Uridine	d8	L8000-05	in 10mM DMSO	DNA/RNA Synthesis	DNA Damage/DNA Repair	Uridine (NSC 20256,β-Uridine, Uridin) is a nucleoside, contains a uracil attached to a ribose ring via a β-N1-glycosidic bond.	244.2	58-96-8	49	200.66	49	200.66	http://selleckchem.com/products/uridine.html	C9H12N2O6	free base	NSC 20256,β-Uridine, Uridin	OCC1OC(C(O)C1O)N2C=CC(=O)NC2=O	-2.451	3	4	2
S2032	Rebamipide	e8	L8000-05	in 10mM DMSO	CCK receptor	GPCR & G Protein	Rebamipide (OPC-12759,Proamipide) is a cholecystokinin type 1 (CCK1) receptor inhibitor for inhibiting [125I]BH-CCK-8S with IC50 of 37.7 μM.	370.79	90098-04-7	74	199.57	<1	N/A	http://selleckchem.com/products/rebamipide.html	C19H15ClN2O4	free base	OPC-12759,Proamipide	OC(=O)C(CC1=CC(=O)NC2=C1C=CC=C2)NC(=O)C3=CC=C(Cl)C=C3	2.606	3	2	5
S2037	Candesartan Cilexetil	f8	L8000-05	in 10mM DMSO	Angiotensin Receptor	GPCR & G Protein	Candesartan Cilexetil (TCV-116) is an angiotensin II receptor antagonist with IC50 of 0.26 nM, used in the treatment of hypertension.	610.66	145040-37-5	122	199.78	<1	N/A	http://selleckchem.com/products/Candesartan-cilexetil-Atacand.html	C33H34N6O6	free base	TCV-116	CCOC1=NC2=C([N]1CC3=CC=C(C=C3)C4=C(C=CC=C4)C5=NN=N[NH]5)C(=CC=C2)C(=O)OC(C)OC(=O)OC6CCCCC6	6.913	10	1	13
S2038	Phentolamine Mesylate	g8	L8000-05	in 10mM DMSO	Adrenergic Receptor	Neuronal Signaling	Phentolamine Mesylate(Phentolamine methanesulfonate) is a reversible and nonselective alpha-adrenergic receptor antagonist, used for the prevention or control of hypertensive episodes.	377.46	65-28-1	76	201.35	76	201.35	http://selleckchem.com/products/phentolamine-mesilate.html	C17H19N3O.CH4O3S	Mesylate	Phentolamine methanesulfonate	CC1=CC=C(C=C1)N(CC2=NCCN2)C3=CC(=CC=C3)O.C[S](O)(=O)=O	2.555	1	2	4
S2040	Nimesulide	h8	L8000-05	in 10mM DMSO	COX	Neuronal Signaling	Nimesulide is a relatively COX-2 selective inhibitor with IC50 of 26 μM.	308.31	51803-78-2	62	201.1	<1	N/A	http://selleckchem.com/products/Nimesulide.html	C13H12N2O5S	free base	N/A	C[S](=O)(=O)NC1=C(OC2=CC=CC=C2)C=C(C=C1)[N+]([O-])=O	2.195	3	1	5
S2042	Cyproterone Acetate	a9	L8000-05	in 10mM DMSO	Androgen Receptor	Endocrinology & Hormones	Cyproterone acetate is an androgen receptor (AR) antagonist with IC50 of 7.1 nM, as well as a weak progesterone receptor agonist with weak pro-gestational and glucocorticoid activity.	416.94	427-51-0	83	199.07	<1	N/A	http://selleckchem.com/products/cyproterone-acetate.html	C24H29ClO4	free base	N/A	CC(=O)OC1(CCC2C3C=C(Cl)C4=CC(=O)C5CC5C4(C)C3CCC12C)C(C)=O	3.314	4	0	3
S2045	Doxifluridine	b9	L8000-05	in 10mM DMSO	Phosphorylase	Metabolism	Doxifluridine (5'-DFUR, AMC 0101) is an oral prodrug that is converted to the cytotoxic agent 5-fluorouracil (5-FU).	246.19	3094-09-5	49	199.03	49	199.03	http://selleckchem.com/products/doxifluridine.html	C9H11FN2O5	free base	5'-DFUR, AMC 0101	CC1OC(C(O)C1O)N2C=C(F)C(=O)NC2=O	-1.653	3	3	1
S2046	Pioglitazone HCl	c9	L8000-05	in 10mM DMSO	Ferroptosis,P450 (e.g. CYP17),PPAR	Metabolism	Pioglitazone HCl (AD-4833, U-72107E) is an inhibitor of cytochrome P450 (CYP)2C8 and CYP3A4 enzymes. Pioglitazone HCl inhibits CYP2C8, CYP3A4 and CYP2C9 with Ki of 1.7 μM, 11.8 μM and 32.1 μM, respectively. Pioglitazone HCl is also a selective peroxisome proliferator-activated receptor-gamma (PPARγ) agonist with EC50 of 0.93 μM and 0.99 μM for human PPARγ and mouse PPARγ, respectively. Pioglitazo…	392.9	112529-15-4	79	201.07	<1	N/A	http://selleckchem.com/products/pioglitazone-hydrochloride-actos.html	C19H20N2O3S.HCl	Hydrochloride	AD-4833, U-72107E	Cl.CCC1=CC=C(CCOC2=CC=C(CC3SC(=O)NC3=O)C=C2)N=C1	4.289	4	1	7
S2051	Captopril	d9	L8000-05	in 10mM DMSO	ACE,RAAS	Endocrinology & Hormones	Captopril (SQ 14225,Capoten) is an angiotensin-converting enzyme (ACE) inhibitor with IC50 of 6 nM.	217.29	62571-86-2	43	197.89	2	9.2	http://selleckchem.com/products/captopril-capoten.html	C9H15NO3S	free base	SQ 14225,Capoten	CC(CS)C(=O)N1CCCC1C(O)=O	0.667	2	0	3
S2053	Cytidine	e9	L8000-05	in 10mM DMSO	Nucleoside Analog/Antimetabolite	DNA Damage/DNA Repair	Cytidine is a nucleoside molecule that is formed when cytosine is attached to a ribose ring, cytidine is a component of RNA.	243.22	65-46-3	49	201.46	49	201.46	http://selleckchem.com/products/cytidine.html	C9H13N3O5	free base	N/A	NC1=NC(=O)N(C=C1)C2OC(CO)C(O)C2O	-2.396	3	4	2
S2055	Gimeracil	f9	L8000-05	in 10mM DMSO	Dehydrogenase	Metabolism	Gimeracil is an inhibitor of dihydropyrimidine dehydrogenase, which inhibits the early step in homologous recombination for double strand breaks repair.	145.54	103766-25-2	29	199.26	<1	N/A	http://selleckchem.com/products/gimeracil.html	C5H4ClNO2	free base	N/A	OC1=CC(=O)NC=C1Cl	-0.493	1	2	0
S2057	Cyclophosphamide (NSC-26271) Monohydrate	g9	L8000-05	in 10mM DMSO	DNA alkylator	DNA Damage/DNA Repair	Cyclophosphamide (NSC-26271, Cytoxan) Monohydrate is a nitrogen mustard alkylating agent, it attaches the alkyl group to the guanine base of DNA, shown to crosslink DNA, causing strand breakage and inducing mutations.	279.1	6055-19-2	55	197.06	7	25.08	http://selleckchem.com/products/cyclophosphamide-monohydrate.html	C7H15Cl2N2O2P.H2O	Monohydrate	Cytoxan Monohydrate	O.ClCCN(CCCl)[P]1(=O)NCCCO1	-0.063	2	1	5
S2058	Tolnaftate	h9	L8000-05	in 10mM DMSO	Fungal	Microbiology	Tolnaftate is a synthetic thiocarbamate used as an anti-fungal agent.	307.41	2398-96-1	62	201.69	<1	N/A	http://selleckchem.com/products/tolnaftate.html	C19H17NOS	free base	N/A	CN(C(=S)OC1=CC=C2C=CC=CC2=C1)C3=CC(=CC=C3)C	6.289	1	0	4
S2059	Terazosin HCl Dihydrate	a10	L8000-05	in 10mM DMSO	Adrenergic Receptor	Neuronal Signaling	Terazosin HCl is a selective α1-adrenoceptor antagonist, used for treatment of symptoms of an enlarged prostate (BPH).	459.92	70024-40-7	26	56.53	<1	N/A	http://selleckchem.com/products/terazosin-hydrochloride-hytrin.html	C19H25N5O4.HCl.2H2O	HCl & Dihydrate	N/A	O.O.Cl.COC1=CC2=C(C=C1OC)C(=NC(=N2)N3CCN(CC3)C(=O)C4CCCO4)N	1.348	6	1	4
S2061	Lovastatin (MK-803)	b10	L8000-05	in 10mM DMSO	Autophagy,HMG-CoA Reductase	Metabolism	Lovastatin (MK-803, Mevinolin,Mevacor) is an inhibitor of HMG-CoA reductase with IC50 of 3.4 nM in a cell-free assay, used for lowering cholesterol (hypolipidemic agent). Lovastatin triggers autophagy.	404.54	75330-75-5	8	19.78	<1	N/A	http://selleckchem.com/products/lovastatin-mevacor.html	C24H36O5	free base	Mevinolin,Mevacor	CCC(C)C(=O)OC1CC(C)C=C2C=CC(C)C(CCC3CC(O)CC(=O)O3)C12	4.218	4	1	7
S2064	Balofloxacin	c10	L8000-05	in 10mM DMSO	Topoisomerase	DNA Damage/DNA Repair	Balofloxacin (Q-35,Q-roxin) is a quinolone antibiotic, inhibiting the synthesis of bacterial DNA by interference with the enqyme DNA gyrase.	389.42	127294-70-6	5	12.84	<1	N/A	http://selleckchem.com/products/balofloxacin.html	C20H24FN3O4	free base	Q-35,Q-roxin	CNC1CCCN(C1)C2=C(OC)C3=C(C=C2F)C(=O)C(=CN3C4CC4)C(O)=O	-0.615	3	1	5
S2065	Lafutidine	d10	L8000-05	in 10mM DMSO	Histamine Receptor	Neuronal Signaling	Lafutidine (FRG-8813), a newly developed histamine H(2)-receptor antagonist, inhibits gastric acid secretion.	431.55	118288-08-7	86	199.28	<1	N/A	http://selleckchem.com/products/lafutidine.html	C22H29N3O4S	free base	FRG-8813	O=C(C[S](=O)CC1=CC=CO1)NC\C=C/COC2=CC(=CC=N2)CN3CCCCC3	1.987	5	1	11
S2067	Ozagrel HCl	e10	L8000-05	in 10mM DMSO	P450 (e.g. CYP17),Prostaglandin Receptor	Metabolism	Ozagrel HCl (OKY-046) is a selective <n>thromboxane A(2) (TXA(2)) synthetase inhibitor with IC50 of 11 nM for rabbit platelet, used for the improvement of postoperative cerebrovascular contraction and accompanying cerebral ischaemia.	264.71	78712-43-3	52	196.44	52	196.44	http://selleckchem.com/products/ozagrel-hydrochloride.html	C13H12N2O2.HCl	HCl	OKY-046 HCl	Cl.OC(=O)/C=C/C1=CC=C(C[N]2C=CN=C2)C=C1	1.986	2	0	4
S2069	Argatroban (MCI-9038)	f10	L8000-05	in 10mM DMSO	Thrombin	Proteases	Argatroban (MCI-9038) is a potent and selective synthetic thrombin inhibitor with Ki ranging from 5 nM to 39 nM, used as an anticoagulant.	508.63	74863-84-6	9	17.69	<1	N/A	http://selleckchem.com/products/argatroban.html	C23H36N6O5S	free base	MCI-9038	CC1CCN(C(C1)C(O)=O)C(=O)C(CCCNC(N)=N)N[S](=O)(=O)C2=CC=CC3=C2NCC(C)C3	1.266	4	4	10
S2072	Seratrodast(AA-2414)	g10	L8000-05	in 10mM DMSO	Prostaglandin Receptor	Metabolism	Seratrodast (AA-2414, ABT-001) is a potent and selective thromboxane A2 receptor (TP) antagonist which is used primarily in the treatment of asthma and used as anti-inflammatory agent.	354.44	112665-43-7	71	200.32	<1	N/A	http://www.selleck.cn/products/seratrodast.html	C22H26O4	Free Base	ABT-001	CC1=C(C)C(=O)C(=C(C)C1=O)C(CCCCCC(O)=O)C2=CC=CC=C2	5.216	3	0	8
S2077	Atorvastatin Calcium	h10	L8000-05	in 10mM DMSO	Apoptosis related,Autophagy,HMG-CoA Reductase	Metabolism	Atorvastatin Calcium is an inhibitor of HMG-CoA reductase used as a cholesterol-lowering medication that blocks the production of cholesterol. Atorvastatin Calcium induces apoptosis and autophagy.	1155.34	134523-03-8	100	86.55	<1	N/A	http://selleckchem.com/products/atorvastatin-calcium-lipitor.html	2(C33H34FN2O5).Ca	Calcium	N/A	[Ca++].CC(C)C1=C(C(=O)NC2=CC=CC=C2)C(=C([N]1CCC(O)CC(O)CC([O-])=O)C3=CC=C(F)C=C3)C4=CC=CC=C4.CC(C)C5=C(C(=O)NC6=CC=CC=C6)C(=C([N]5CCC(O)CC(O)CC([O-])=O)C7=CC=C(F)C=C7)C8=CC=CC=C8	8.163	2	6	24
S2078	Famotidine	a11	L8000-05	in 10mM DMSO	Histamine Receptor	Neuronal Signaling	Famotidine (MK208) is a histamine H2–receptor antagonist with IC50 of 0.6 mM, commonly used to treat heartburn, GERD, ulcers, and other digestive conditions.	337.45	76824-35-6	67	198.55	<1	N/A	http://selleckchem.com/products/famotidine-pepcid.html	C8H15N7O2S3	free base	MK208	NC(=N)NC1=NC(=CS1)CSCCC(=N)N[S](N)(=O)=O	-1.328	3	4	9
S2080	Clevidipine Butyrate	b11	L8000-05	in 10mM DMSO	Calcium Channel	Transmembrane Transporters	Clevidipine Butyrate(Cleviprex) is a dihydropyridine calcium channel blocker, uses as an agent for the reduction of blood pressure.	456.32	167221-71-8	91	199.42	<1	N/A	http://selleckchem.com/products/cleviprex-clevidipine.html	C21H23Cl2NO6	free base	Cleviprex	CCCC(=O)OCOC(=O)C1=C(C)NC(=C(C1C2=CC=CC(=C2Cl)Cl)C(=O)OC)C	4.145	6	1	10
S2082	Adiphenine HCl	c11	L8000-05	in 10mM DMSO	AChR	Neuronal Signaling	Adiphenine HCl(NSC 129224) is a nicotinic receptor inhibitor, used as an antispasmodic drug.	347.88	50-42-0	30	86.24	70	201.22	http://selleckchem.com/products/adiphenine-hcl.html	C20H25NO2.HCl	HCl	NSC 129224	Cl.CCN(CC)CCOC(=O)C(C1=CC=CC=C1)C2=CC=CC=C2	4.433	2	0	9
S2086	Ivabradine HCl	d11	L8000-05	in 10mM DMSO	Adrenergic Receptor	Neuronal Signaling	Ivabradine HCl (S 16257-2,S-18982 D6 hydrochloride), a new If inhibitor with IC 50 of 2.9 μM which acts specifically on the pacemaker activity of the sinoatrial node, is a pure heart rate lowering agent.	505.05	148849-67-6	101	199.98	82	162.36	http://selleckchem.com/products/ivabradine-hcl-procoralan.html	C27H36N2O5.HCl	HCl	S 16257-2,S-18982 D6 hydrochloride	Cl.COC1=CC2=C(CC(=O)N(CCCN(C)CC3CC4=CC(=C(OC)C=C34)OC)CC2)C=C1OC	3.753	5	0	10
S2087	Rivastigmine Tartrate	e11	L8000-05	in 10mM DMSO	AChR	Neuronal Signaling	Rivastigmine Tartrate (ENA 713) is a cholinesterase inhibitor with IC50 of 5.5 μM, and used as a parasympathomimetic or cholinergic agent for the treatment of mild to moderate Alzheimer disease.	400.42	129101-54-8	42	104.89	80	199.79	http://selleckchem.com/products/rivastigmine-tartrate-exelon.html	C14H22N2O2.C4H6O6	Tartrate	ENA 713	CCN(C)C(=O)OC1=CC=CC(=C1)C(C)N(C)C.OC(C(O)C(O)=O)C(O)=O	-2.099	4	2	8
S2090	Dexmedetomidine HCl	f11	L8000-05	in 10mM DMSO	Adrenergic Receptor	Neuronal Signaling	Dexmedetomidine HCl((+)-Medetomidine Hydrochloride) is a highly selective and potent alpha-2 adrenoceptor agonist, which reduces anesthetic requirements for patients by providing significant sedation.	236.74	145108-58-3	48	202.75	<1	N/A	http://selleckchem.com/products/dexmedetomidine-hcl-precedex.html	C13H16N2.HCl	HCl	(+)-Medetomidine Hydrochloride	Cl.CC(C1=CN=C[NH]1)C2=CC=CC(=C2C)C	3.378	1	1	2
S2096	Almotriptan Malate	g11	L8000-05	in 10mM DMSO	5-HT Receptor	Neuronal Signaling	Almotriptan Malate (LAS 31416) is a selective 5-hydroxytryptamine1B/1D (5-HT1B/1D) receptor agonist, used for the treatment of Migraine attacks in adults.	469.55	181183-52-8	94	200.19	<1	N/A	http://selleckchem.com/products/almotriptan-malate-axert.html	C17H25N3O2S.C4H6O5	Malate	LAS 31416	CN(C)CCC1=C[NH]C2=CC=C(C[S](=O)(=O)N3CCCC3)C=C12.OC(CC(O)=O)C(O)=O	-1.943	4	2	9
S2098	Bexarotene (LGD1069)	h11	L8000-05	in 10mM DMSO	Retinoid Receptor	Metabolism	Bexarotene (Targretin, LGD1069) is a retinoid specifically selective for retinoid X receptors, used as an oral antineoplastic agent in the treatment of cutaneous T-cell lymphoma.	348	153559-49-0	8	22.99	<1	N/A	http://selleckchem.com/products/bexarotene.html	C24H28O2	free base	Targretin	CC1=CC2=C(C=C1C(=C)C3=CC=C(C=C3)C(O)=O)C(C)(C)CCC2(C)C	6.405	1	0	3
S2099	Temocapril HCl	a2	L8000-06	in 10mM DMSO	ACE,RAAS	Endocrinology & Hormones	Temocapril HCl (CS-622) is the hydrochloride of Temocapril, which is a long-acting angiotensin-converting enzyme (ACE) inhibitor, used for the treatment of hypertension.	513.07	110221-44-8	103	200.75	<1	N/A	http://selleckchem.com/products/temocapril-hcl.html	C23H28N2O5S2.HCl	Hydrochloride	CS-622 HCl	Cl.CCOC(=O)C(CCC1=CC=CC=C1)NC2CSC(CN(CC(O)=O)C2=O)C3=CC=CS3	0.787	4	1	11
S2101	Gabexate Mesylate	b2	L8000-06	in 10mM DMSO	Serine Protease	Proteases	Gabexate Mesylate(FOY) is a serine protease inhibitor with IC50 of 0.19 μM which is used therapeutically in the treatment of pancreatitis and disseminated intravascular coagulation.	417.48	56974-61-9	83	198.81	12	28.74	http://selleckchem.com/products/gabexate-mesylate.html	C16H23N3O4.CH4O3S	Mesylate	FOY	CCOC(=O)C1=CC=C(OC(=O)CCCCCNC(N)=N)C=C1.C[S](O)(=O)=O	1.774	4	2	12
S2102	Rasagiline Mesylate	c2	L8000-06	in 10mM DMSO	MAO	Metabolism	Rasagiline Mesylate (TVP-1012,(R)-AGN1135 mesylate,TVP1012 mesylate) is a new MAO-B inhibitor for the treatment of idiopathic Parkinson's disease.	267.34	161735-79-1	53	198.25	53	198.25	http://selleckchem.com/products/rasagiline-mesylate.html	C12H13N.CH4O3S	Mesylate	TVP-1012,(R)-AGN1135 mesylate,TVP1012 mesylate	C[S](O)(=O)=O.C#CCNC1CCC2=CC=CC=C12	2.705	0	1	2
S2103	Naltrexone HCl	d2	L8000-06	in 10mM DMSO	Opioid Receptor	Neuronal Signaling	Naltrexone HCl(PTI-901) is an opioid receptor antagonist used primarily in the management of alcohol dependence and opioid dependence.	377.86	16676-29-2	14	37.05	14	37.05	http://selleckchem.com/products/naltrexone-hcl.html	C20H23NO4.HCl	Hydrochloride	PTI-901	Cl.OC1=CC=C2CC3N(CCC45C(OC1=C24)C(=O)CCC35O)CC6CC6	2.039	2	1	2
S2105	Pantoprazole	e2	L8000-06	in 10mM DMSO	ATPase,Proton Pump	Transmembrane Transporters	Pantoprazole (SKF96022, BY-1023) is a proton pump inhibitor drug that inhibits gastric acid secretion. It works on gastric parietal cells to irreversibly inhibit (H+/K+)-ATPase function and suppress the production of gastric acid.	383.37	102625-70-7	76	198.24	<1	N/A	http://selleckchem.com/products/pantoprazole-protonix.html	C16H15F2N3O4S	free base	SKFSKF96022, BY-1023	COC1=C(OC)C(=NC=C1)C[S](=O)C2=NC3=CC=C(OC(F)F)C=C3[NH]2	2.737	6	1	7
S2108	Flunixin Meglumin	f2	L8000-06	in 10mM DMSO	COX	Neuronal Signaling	Flunixin Meglumin(Banamine) is a potent inhibitor of the enzyme cyclooxygenase (COX) used as analgesic agent with anti-inflammatory and antipyretic activity.	491.46	42461-84-7	98	199.41	98	199.41	http://selleckchem.com/products/flunixin-meglumin.html	C14H11F3N2O2.C7H17NO5	Meglumin	Banamine	CNCC(O)C(O)C(O)C(O)CO.CC1=C(C=CC=C1NC2=NC=CC=C2C(O)=O)C(F)(F)F	-1.676	2	7	10
S2109	Imidapril HCl	g2	L8000-06	in 10mM DMSO	ACE,RAAS	Endocrinology & Hormones	Imidapril HCl(TA-6366) is an angiotensin-converting enzyme (ACE) inhibitor with IC50 of 2.6 nM, used for the treatment of hypertension.	441.91	89396-94-1	88	199.14	54	122.2	http://selleckchem.com/products/imidapril-tanatril.html	C20H27N3O6.HCl	Hydrochloride	TA-6366	Cl.CCOC(=O)C(CCC1=CC=CC=C1)NC(C)C(=O)N2C(CN(C)C2=O)C(O)=O	-1.197	5	1	10
S2111	Lapatinib (GW-572016)	h2	L8000-06	in 10mM DMSO	Autophagy,EGFR,Ferroptosis,HER2	Protein Tyrosine Kinase	Lapatinib (GW-572016, GSK572016, GW2016), used in the form of Lapatinib Ditosylate, is a potent EGFR and ErbB2 inhibitor with IC50 of 10.8 and 9.2 nM in cell-free assays, respectively. Lapatinib induces ferroptosis and autophagic cell death.	581.06	231277-92-2	100	172.1	<1	N/A	http://selleckchem.com/products/lapatinib.html	C29H26ClFN4O4S	free base	GSK572016, GW2016	C[S](=O)(=O)CCNCC1=CC=C(O1)C2=CC=C3N=CN=C(NC4=CC=C(OCC5=CC=CC(=C5)F)C(=C4)Cl)C3=C2	6.041	6	2	11
S2113	Cisatracurium Besylate	a3	L8000-06	in 10mM DMSO	Adrenergic Receptor	Neuronal Signaling	Cisatracurium Besylate(51W89) is a nondepolarizing neuromuscular blocking agent, antagonizing the action of acetylcholine by inhibiting neuromuscular transmission.	1243.48	96946-42-8	249	200.24	47	37.8	http://selleckchem.com/products/cisatracurium-besylate-nimbex.html	C53H72N2O12.2C6H5O3S	Besylate	51W89	COC1=CC=C(CC2C3=CC(=C(OC)C=C3CC[N+]2(C)CCC(=O)OCCCCCOC(=O)CC[N+]4(C)CCC5=CC(=C(OC)C=C5C4CC6=CC=C(OC)C(=C6)OC)OC)OC)C=C1OC.[O-][S](=O)(=O)C7=CC=CC=C7.[O-][S](=O)(=O)C8=CC=CC=C8	3.646	12	0	28
S2114	Dronedarone HCl	b3	L8000-06	in 10mM DMSO	Calcium Channel,Potassium Channel,Sodium Channel	Transmembrane Transporters	Dronedarone HCl (SR33589) is a multichannel blocker targeting potassium channel, sodium channel and calcium channel, used as an antiarrhythmic drug for treatment of atrial fibrillation (AF).	593.22	141625-93-6	80	134.86	<1	N/A	http://selleckchem.com/products/dronedarone-hcl-multaq.html	C31H44N2O5S.HCl	HCl	SR33589	Cl.CCCCN(CCCC)CCCOC1=CC=C(C=C1)C(=O)C2=C(CCCC)OC3=CC=C(N[S](C)(=O)=O)C=C23	7.397	5	1	18
S2118	Ibutilide Fumarate	c3	L8000-06	in 10mM DMSO	Sodium Channel	Transmembrane Transporters	Ibutilide Fumarate (U-70226E,Corvert Fumarate) is a Class III antiarrhythmic agent that is indicated for acute cardioconversion of atrial fibrillation and atrial flutter of a recent onset to sinus rhythm by induction of slow inward sodium current, which prolongs action potential and refractory period of myocardial cells.	885.23	122647-32-9	89	100.54	89	100.54	http://selleckchem.com/products/ibutilide-fumarate.html	(C20H36N2O3S)2.C4H4O4	Fumarate	U-70226E,Corvert Fumarate	CCCCCCCN(CC)CCCC(O)C1=CC=C(N[S](C)(=O)=O)C=C1.CCCCCCCN(CC)CCCC(O)C2=CC=C(N[S](C)(=O)=O)C=C2.OC(=O)\C=C\C(O)=O	1.954	6	4	30
S2119	Probucol	d3	L8000-06	in 10mM DMSO	LDL	Metabolism	Probucol (DH-581) is an anti-hyperlipidemic drug by lowering the level of cholesterol in the bloodstream by increasing the rate of LDL catabolism.	516.84	23288-49-5	103	199.29	<1	N/A	http://selleckchem.com/products/probucol.html	C31H48O2S2	free base	DH-581	CC(C)(C)C1=CC(=CC(=C1O)C(C)(C)C)SC(C)(C)SC2=CC(=C(O)C(=C2)C(C)(C)C)C(C)(C)C	9.779	0	2	8
S2125	Mestranol	e3	L8000-06	in 10mM DMSO	Estrogen/progestogen Receptor	Endocrinology & Hormones	Mestranol is the 3-methyl ether of ethinyl estradiol, which is a potent estrogen receptor agonist and used as oral contraceptives.	310.43	72-33-3	15	48.32	<1	N/A	http://selleckchem.com/products/Mestranol.html	C21H26O2	free base	N/A	COC1=CC2=C(C=C1)C3CCC4(C)C(CCC4(O)C#C)C3CC2	5.112	1	0	1
S2126	Naftopidil	f3	L8000-06	in 10mM DMSO	Adrenergic Receptor	Neuronal Signaling	Naftopidil (KT-611) is a selective α1-adrenergic receptor antagonist with Ki of 3.7 nM, 20 nM, and 1.2 nM for α1a, α1b, and α1d, respectively, used for the treatment of benign prostatic hyperplasia.	392.49	57149-07-2	79	201.28	<1	N/A	http://selleckchem.com/products/Naftopidil(Flivas).html	C24H28N2O3	Free Base	KT-611	COC1=CC=CC=C1N2CCN(CC2)CC(O)COC3=C4C=CC=CC4=CC=C3	3.962	2	1	7
S2127	S-(+)-Rolipram	g3	L8000-06	in 10mM DMSO	PDE	Metabolism	S-(+)-Rolipram inhibits human monocyte cyclic AMP-specific PDE4 with IC50 of 0.75 μM, has anti-inflammatory and anti-depressant activity in the central nervous system, less potent than its R enantiomer.	275.34	85416-73-5	55	199.75	<1	N/A	http://selleckchem.com/products/sRolipram.html	C16H21NO3	free base	N/A	COC1=C(OC2CCCC2)C=C(C=C1)C3CNC(=O)C3	2.349	3	1	4
S2128	Bazedoxifene (WAY-140424) HCl	h3	L8000-06	in 10mM DMSO	Estrogen/progestogen Receptor	Endocrinology & Hormones	Bazedoxifene HCl (WAY-140424, TSE-424) is a novel, non-steroidal, indole-based estrogen receptor modulator (SERM) binding to both ERα and ERβ with IC50 of 23 nM and 89 nM, respectively.	507.06	198480-56-7	101	199.19	<1	N/A	http://selleckchem.com/products/bazedoxifene-hcl.html	C30H34N2O3.HCl	Hydrochloride	TSE-424	Cl.CC1=C([N](CC2=CC=C(OCCN3CCCCCC3)C=C2)C4=CC=C(O)C=C14)C5=CC=C(O)C=C5	7.602	1	2	7
S2130	Atropine sulfate monohydrate	a4	L8000-06	in 10mM DMSO	AChR,ADC Cytotoxin	Neuronal Signaling	Atropine sulfate monohydrate is a competitive antagonist for the muscarinic acetylcholine receptor, used to decrease the production of saliva and secretions of the airway prior to surgery.	694.83	5908-99-6	139	200.05	139	200.05	http://selleckchem.com/products/Atropine-sulfate-monohydrate.html	2(C17H23NO3).H2O.H2SO4	Sulfate monohydrate	N/A	O.CN1C2CCC1CC(C2)OC(=O)C(CO)C3=CC=CC=C3.CN4C5CCC4CC(C5)OC(=O)C(CO)C6=CC=CC=C6.O[S](O)(=O)=O	2.628	4	2	10
S2131	Roflumilast (B9302-107)	b4	L8000-06	in 10mM DMSO	PDE	Metabolism	Roflumilast (APTA 2217, B9302-107, BY 217, BYK 20869) is a selective inhibitor of PDE4 with IC50 of 0.2-4.3 nM in a cell-free assay.	403.21	162401-32-3	81	200.89	<1	N/A	http://selleckchem.com/products/Roflumilast(Daxas).html	C17H14Cl2F2N2O3	free base	APTA 2217, B9302-107, BY 217, BYK 20869	FC(F)OC1=CC=C(C=C1OCC2CC2)C(=O)NC3=C(Cl)C=NC=C3Cl	4.402	4	1	7
S2151	Sonidegib (NVP-LDE225)	c4	L8000-06	in 10mM DMSO	Hedgehog/Smoothened	Stem Cells & Wnt	Sonidegib (Erismodegib, NVP-LDE225) is a Smoothened (Smo) antagonist, inhibiting Hedgehog (Hh) signaling with IC50 of 1.3 nM (mouse) and 2.5 nM (human) in cell-free assays, respectively. Phase 3.	485.5	956697-53-3	97	199.79	<1	N/A	http://selleckchem.com/products/LDE225(NVP-LDE225).html	C26H26F3N3O3	free base	Erismodegib	CC1CN(CC(C)O1)C2=CC=C(NC(=O)C3=C(C)C(=CC=C3)C4=CC=C(OC(F)(F)F)C=C4)C=N2	6.732	4	1	6
S2154	Dabigatran (BIBR-1048) etexilate	d4	L8000-06	in 10mM DMSO	Thrombin	Proteases	Dabigatran Etexilate (BIBR-1048) is the prodrug of dabigatran, a potent, nonpeptidic small molecule that specifically and reversibly inhibits both free and clot-bound thrombin by binding to the active site of the thrombin molecule.	627.73	211915-06-9	126	200.72	<1	N/A	http://selleckchem.com/products/BIBR-1048(Dabigatran-etexilate).html	C34H41N7O5	free base	BIBR-1048	CCCCCCOC(=O)N=C(N)C1=CC=C(NCC2=NC3=C(C=CC(=C3)C(=O)N(CCC(=O)OCC)C4=CC=CC=N4)[N]2C)C=C1	5.751	8	2	17
S2167	Bazedoxifene (TSE-424) acetate	e4	L8000-06	in 10mM DMSO	Estrogen/progestogen Receptor	Endocrinology & Hormones	Bazedoxifene Acetate (WAY-140424,TSE-424 acetate) is a third generation selective estrogen receptor modulator (SERM).	530.65	198481-33-3	100	188.45	<1	N/A	http://selleckchem.com/products/Bazedoxifene-acetate.html	C30H34N2O3.C2H4O2	Acetate	WAY-140424,TSE-424 acetate	CC(O)=O.CC1=C([N](CC2=CC=C(OCCN3CCCCCC3)C=C2)C4=CC=C(O)C=C14)C5=CC=C(O)C=C5	3.981	2	2	7
S2169	Rosuvastatin (ZD4522) calcium	f4	L8000-06	in 10mM DMSO	COVID-19,HMG-CoA Reductase	Metabolism	Rosuvastatin Calcium (ZD4522 calcium) is a competitive inhibitor of HMG-CoA reductase with IC50 of 11 nM in a cell-free assay.	500.57	147098-20-2	100	199.77	<1	N/A	http://selleckchem.com/products/Rosuvastatin-calcium(Crestor).html	C22H28FN3O6S.1/2Ca	Calcium salt	ZD4522 calcium	[Ca++].CC(C)C1=C(\C=C\C(O)CC(O)CC([O-])=O)C(=NC(=N1)N(C)[S](C)(=O)=O)C2=CC=C(F)C=C2.CC(C)C3=C(\C=C\C(O)CC(O)CC([O-])=O)C(=NC(=N3)N(C)[S](C)(=O)=O)C4=CC=C(F)C=C4	1.906	8	4	20
S2173	Telotristat Etiprate (LX 1606 Hippurate)	g4	L8000-06	in 10mM DMSO	Hydroxylase	Metabolism	Telotristat Etiprate (LX 1606 Hippurate) is an orally bioavailable, tryptophan hydroxylase (TPH) inhibitor with potential antiserotonergic activity. Phase 3.	754.15	1137608-69-5	100	132.6	<1	N/A	http://selleckchem.com/products/telotristat-etiprate-lx-1606-hippurate.html	C27H26ClF3N6O3.C9H9NO3	Hippuric acid	N/A	CCOC(=O)C(N)CC1=CC=C(C=C1)C2=CC(=NC(=N2)N)OC(C3=CC=C(Cl)C=C3[N]4C=CC(=N4)C)C(F)(F)F.OC(=O)CNC(=O)C5=CC=CC=C5	3.747	8	3	14
S2177	Dichlorphenamide	h4	L8000-06	in 10mM DMSO	Carbonic Anhydrase	Metabolism	Dichlorphenamide (Diclofenamide) is a sulfonamide and a carbonic anhydrase inhibitor of the meta-Disulfamoylbenzene class.	305.16	120-97-8	61	199.89	N/A	N/A	http://www.selleckchem.com/products/Dichlorphenamide(Diclofenamide).html	C6H6Cl2N2O4S2	Free Base	Diclofenamide	N[S](=O)(=O)C1=CC(=C(Cl)C(=C1)[S](N)(=O)=O)Cl	N/A	N/A	N/A	N/A
S2180	Ixazomib (MLN2238)	a5	L8000-06	in 10mM DMSO	Autophagy,Proteasome	Proteases	Ixazomib (MLN2238) inhibits the chymotrypsin-like proteolytic (β5) site of the 20S proteasome with IC50 and Ki of 3.4 nM and 0.93 nM in cell-free assays, respectively, also inhibits the caspase-like (β1) and trypsin-like (β2) proteolytic sites, with IC50 of 31 and 3500 nM. Ixazomib (MLN2238) induces autophagy. Phase 3.	361.03	1072833-77-2	72	199.43	<1	N/A	http://selleckchem.com/products/MLN-2238.html	C14H19BCl2N2O4	Free Base	N/A	CC(C)CC(NC(=O)CNC(=O)C1=C(Cl)C=CC(=C1)Cl)B(O)O	3.344	2	2	7
S2181	Ixazomib Citrate (MLN9708) Analogue	b5	L8000-06	in 10mM DMSO	Autophagy,Proteasome	Proteases	Ixazomib Citrate (MLN9708) Analogue is the analogue of Ixazomib Citrate (MLN9708) from WO2016165677A1. Ixazomib Citrate (MLN9708) immediately hydrolyzed to Ixazomib (MLN2238), the biologically active form, on exposure to aqueous solutions or plasma. Ixazomib (MLN2238) inhibits the chymotrypsin-like proteolytic (β5) site of the 20S proteasome with IC50/Ki of 3.4 nM/0.93 nM in cell-free assays, les…	517.12	1201902-80-8	100	193.38	<1	N/A	http://selleckchem.com/products/MLN9708.html	C20H23BCl2N2O9	free base	N/A	CC(C)CC(NC(=O)CNC(=O)C1=C(Cl)C=CC(=C1)Cl)B2OC(=O)CC(CC(O)=O)(O2)C(O)=O	3.497	7	2	10
S2199	Aliskiren Hemifumarate	c5	L8000-06	in 10mM DMSO	RAAS	Endocrinology & Hormones	Aliskiren hemifumarate(CGP 60536 hemifumarate, CGP60536B hemifumarate, SPP 100 hemifumarate) is a direct renin inhibitor with IC50 of 1.5 nM.	609.83	173334-58-2	100	163.98	100	163.98	http://selleckchem.com/products/Aliskiren-hemifumarate.html	C30H53N3O6.1/2C4H4O4	fumarate salt	CGP 60536 hemifumarate, CGP60536B hemifumarate, SPP 100 hemifumarate	COCCCOC1=C(OC)C=CC(=C1)CC(CC(N)C(O)CC(C(C)C)C(=O)NCC(C)(C)C(N)=O)C(C)C.COCCCOC2=C(OC)C=CC(=C2)CC(CC(N)C(O)CC(C(C)C)C(=O)NCC(C)(C)C(N)=O)C(C)C.OC(=O)\C=C\C(O)=O	1.735	12	8	40
S2208	Formestane	d5	L8000-06	in 10mM DMSO	Aromatase	Endocrinology & Hormones	Formestane (CGP-32349, NSC 282175) is a second generation selective aromatase inhibitor with an IC50 of 80 nM.	302.41	566-48-3	61	201.71	<1	N/A	http://selleckchem.com/products/Formestane.html	C19H26O3	free base	CGP-32349, NSC 282175	CC12CCC3C(CCC4=C(O)C(=O)CCC34C)C1CCC2=O	3.036	2	1	0
S2217	Irinotecan (CPT-11) HCl Trihydrate	e5	L8000-06	in 10mM DMSO	Topoisomerase	DNA Damage/DNA Repair	Irinotecan (CPT-11) prevents DNA from unwinding by inhibition of topoisomerase 1.	677.18	136572-09-3	100	147.67	1	1.48	http://selleckchem.com/products/Irinotecan-Hcl-Trihydrate-Campto.html	C33H38N4O6.HCl.3H2O	HCl & trihydrat	CPT-11 HCl Trihydrate	O.O.O.Cl.CCC1=C2CN3C(=O)C4=C(C=C3C2=NC5=CC=C(OC(=O)N6CCC(CC6)N7CCCCC7)C=C15)C(O)(CC)C(=O)OC4	3.446	6	0	5
S2226	Idelalisib	f5	L8000-06	in 10mM DMSO	Autophagy,PI3K	PI3K/Akt/mTOR	Idelalisib (CAL-101, GS-1101) is a selective p110δ inhibitor with IC50 of 2.5 nM in cell-free assays; shown to have 40- to 300-fold greater selectivity for p110δ than p110α/β/γ, and 400- to 4000-fold more selectivity to p110δ than C2β, hVPS34, DNA-PK and mTOR. Idelalisib also stimulates autophagy.	415.42	870281-82-6	83	199.8	<1	N/A	http://selleckchem.com/products/CAL-101.html	C22H18FN7O	free base	CAL-101, GS-1101	CCC(NC1=C2N=C[NH]C2=NC=N1)C3=NC4=CC=CC(=C4C(=O)N3C5=CC=CC=C5)F	3.624	5	2	5
S2229	Eltrombopag (SB497115) Olamine	g5	L8000-06	in 10mM DMSO	TpoR	Immunology & Inflammation	Eltrombopag Olamine (SB-497115-GR, Revolade, Promacta,Promacta Olamine) is a member of the biarylhydrazone class, which is a nonpeptide agonist of the thrombopoietin receptor (TpoR).	564.63	496775-62-3	89	157.63	<1	N/A	http://selleckchem.com/products/Eltrombopag-SB-497115-GR.html	C29H36N6O6	diolamine	SB-497115-GR, Revolade, Promacta,Promacta Olamine	CC1=CC=C(C=C1C)N2N=C(C)C(=N/NC3=CC=CC(=C3O)C4=CC(=CC=C4)C(O)=O)/C2=O.NCCO.NCCO	-0.151	4	6	7
S2233	Esomeprazole sodium	h5	L8000-06	in 10mM DMSO	ATPase	Transmembrane Transporters	Esomeprazole Sodium((S)-Omeprazole sodium, (-)-Omeprazole sodium) is a sodium salt of esomeprazole that is a potent proton pump inhibitor with an IC50 of 0.076 mg/kg.	367.4	161796-78-7	73	198.69	73	198.69	http://selleckchem.com/products/esomeprazole-sodium.html	C17H18N3O3S.Na	Sodium salt	(S)-Omeprazole sodium, (-)-Omeprazole sodium	COC1=CC=C2[N]([Na])C(=NC2=C1)[S](=O)CC3=NC=C(C)C(=C3C)OC	3.008	5	0	5
S2246	Abiraterone Acetate (CB7630)	a6	L8000-06	in 10mM DMSO	Androgen Receptor,P450 (e.g. CYP17)	Metabolism	Abiraterone Acetate (CB7630, CB-7630) is an acetate salt form of Abiraterone which is a steroidal cytochrome CYP17 inhibitor with IC50 of 72 nM in a cell-free assay. Abiraterone acetate is an oral androgen biosynthesis inhibitor.	391.55	154229-18-2	20	51.08	<1	N/A	http://www.selleck.cn/products/Abiraterone-Acetate-CB7630.html	C26H33NO2	Acetate	CB7630, CB-7630	CC(=O)OC1CCC2(C)C3CCC4(C)C(CC=C4C5=CC=CN=C5)C3CC=C2C1	4.602	3	0	3
S2250	(-)-Epigallocatechin Gallate	b6	L8000-06	in 10mM DMSO	DNA Methyltransferase,EGFR,Fatty Acid Synthase,HER2,Telomerase	DNA Damage/DNA Repair	(-)-Epigallocatechin Gallate(EGCG) is the main catechin extraction of green tea that inhibits telomerase and DNA methyltransferase. EGCG blocks the activation of EGF receptors and HER-2 receptors. ECGG inhibits fatty acid synthase and glutamate dehydrogenase activity.	458.37	989-51-5	72	157.08	23	50.18	http://selleckchem.com/products/(-)-Epigallocatechin-gallate.html	C22H18O11	free base	EGCG	OC1=CC2=C(CC(OC(=O)C3=CC(=C(O)C(=C3)O)O)C(O2)C4=CC(=C(O)C(=C4)O)O)C(=C1)O	3.097	3	8	4
S2256	4-Methylumbelliferone (4-MU)	c6	L8000-06	in 10mM DMSO	Others	Others	4-Methylumbelliferone is a hyaluronic acid (HA) synthesis inhibitor with an IC50 of 0.4 mM.	176.17	90-33-5	35	198.67	<1	N/A	http://selleckchem.com/products/4-Methylumbelliferone(4-MU).html	C10H8O3	free base	N/A	CC1=CC(=O)OC2=C1C=CC(=C2)O	2.104	2	1	0
S2258	Esculin	d6	L8000-06	in 10mM DMSO	Others	Others	Esculin (Aesculin) is a glucoside found in horse chestnuts.	340.28	531-75-9	68	199.84	2	5.88	http://selleckchem.com/products/Aesculin(Esculin).html	C15H16O9	free base	Aesculin	OCC1OC(OC2=C(O)C=C3OC(=O)C=CC3=C2)C(O)C(O)C1O	-0.514	4	5	3
S2260	Amygdalin	e6	L8000-06	in 10mM DMSO	Others	Others	Amygdalin is a glycoside initially isolated from the seeds of the tree Prunus dulcis, also known as bitter almonds.	457.43	29883-15-6	91	198.94	<1	N/A	http://selleckchem.com/products/Amygdalin.html	C20H27NO11	free base	N/A	OCC1OC(OCC2OC(OC(C#N)C3=CC=CC=C3)C(O)C(O)C2O)C(O)C(O)C1O	-2.403	4	7	7
S2261	Andrographolide	f6	L8000-06	in 10mM DMSO	NF-κB	NF-κB	Andrographolide is a labdane diterpenoid that is the main bioactive component of the medicinal plant Andrographis paniculata.	350.45	5508-58-7	70	199.74	<1	N/A	http://selleckchem.com/products/Andrographolide.html	C20H30O5	free base	N/A	CC1(CO)C(O)CCC2(C)C(C\C=C\3C(O)COC3=O)C(=C)CCC12	2.056	2	3	3
S2262	Apigenin (LY 080400)	g6	L8000-06	in 10mM DMSO	P450 (e.g. CYP17)	Metabolism	Apigenin (NSC 83244, LY 080400) is a potent P450 inhibitor for CYP2C9 with Ki of 2 μM.	270.24	520-36-5	54	199.82	<1	N/A	http://selleckchem.com/products/Apigenin.html	C15H10O5	free base	NSC 83244	OC1=CC=C(C=C1)C2=CC(=O)C3=C(O2)C=C(O)C=C3O	2.41	2	3	1
S2263	Arbutin	h6	L8000-06	in 10mM DMSO	Tyrosinase	Proteases	Arbutin (Uva, p-Arbutin, β-Arbutin) is a tyrosinase inhibitor with IC50 of 0.9 mM and 0.7 mM for Monophenolase and Diphenolase, respectively.	272.25	497-76-7	55	202.02	55	202.02	http://selleckchem.com/products/Arbutin(Uva,-p-Arbutin).html	C12H16O7	free base	Uva,p-Arbutin, β-Arbutin	OCC1OC(OC2=CC=C(O)C=C2)C(O)C(O)C1O	-0.584	2	5	3
S2264	Artemether	a7	L8000-06	in 10mM DMSO	ADC Cytotoxin,Anti-infection	Microbiology	Artemether (SM-224, CGP 56696) is an antimalarial for the treatment of resistant strains of falciparum malaria.	298.37	71963-77-4	60	201.09	<1	N/A	http://selleckchem.com/products/Artemether(SM-224).html	C16H26O5	free base	SM-224, CGP 56696	COC1OC2OC3(C)CCC4C(C)CCC(C1C)C24OO3	2.029	5	0	1
S2265	Artesunate (WR-256283)	b7	L8000-06	in 10mM DMSO	ADC Cytotoxin,STAT	JAK/STAT	Artesunate (WR-256283) is a part of the artemisinin group of agents with an IC50 of < 5 μM for small cell lung carcinoma cell line H69. It is a potential inhibitor of STAT-3 and exhibits selective cytotoxicity of cancer cells over normal cells in vitro; A potent inhibitor of EXP1.	384.42	88495-63-0	77	200.3	<1	N/A	http://selleckchem.com/products/Artesunate.html	C19H28O8	free base	WR-256283	CC1CCC2C(C)C(OC3OC4(C)CCC1C23OO4)OC(=O)CCC(O)=O	1.845	7	0	5
S2266	Asiatic Acid	c7	L8000-06	in 10mM DMSO	p38 MAPK	MAPK	Asiatic acid (Dammarolic acid, Asiantic acid) is the aglycone of asiaticoside isolated from the plant Centella asiatica, commonly used in wound healing.	488.7	464-92-6	97	198.49	<1	N/A	http://selleckchem.com/products/Asiatic-acid.html	C30H48O5	free base	Dammarolic acid, Asiantic acid	CC1CCC2(CCC3(C)C(=CCC4C5(C)CC(O)C(O)C(C)(CO)C5CCC34C)C2C1C)C(O)=O	4.435	1	3	2
S2268	Baicalein	d7	L8000-06	in 10mM DMSO	P450 (e.g. CYP17),PREP	Metabolism	Baicalein is a CYP2C9 and prolyl endopeptidase inhibitor.	270.24	491-67-8	54	199.82	<1	N/A	http://selleckchem.com/products/Baicalein.html	C15H10O5	free base	N/A	OC1=C(O)C(=C2C(=O)C=C(OC2=C1)C3=CC=CC=C3)O	2.41	2	3	1
S2269	Baicalin (NSC-661431)	e7	L8000-06	in 10mM DMSO	GABA Receptor,PREP	Neuronal Signaling	Baicalin (NSC-661431) is a known prolyl endopeptidase inhibitor and affects the GABA receptors.	446.36	21967-41-9	89	199.39	<1	N/A	http://selleckchem.com/products/Baicalin.html	C21H18O11	free base	N/A	OC1C(O)C(OC(C1O)C(O)=O)OC2=C(O)C(=C3C(=O)C=C(OC3=C2)C4=CC=CC=C4)O	0.608	5	5	4
S2270	Bergenin	f7	L8000-06	in 10mM DMSO	Others	Others	Bergenin (Cuscutin) is trihydroxybenzoic acid glycoside and the C-glycoside of 4-O-methyl gallic acid.	328.27	477-90-7	66	201.05	<1	N/A	http://selleckchem.com/products/Bergenin-(Cuscutin).html	C14H16O9	free base	Cuscutin	COC1=C(O)C2=C(C=C1O)C(=O)OC3C(O)C(O)C(CO)OC23	-0.849	4	5	2
S2271	Berberine chloride (NSC 646666)	g7	L8000-06	in 10mM DMSO	Anti-infection,Apoptosis related,Autophagy,Bcl-2,Caspase,IAP,JNK,p38 MAPK,P450 (e.g. CYP17),PARP,ROS,Topoisomerase	Microbiology	Berberine chloride (NSC 646666, Natural Yellow 18) is a quaternary ammonium salt from the group of isoquinoline alkaloids. Berberine activates caspase 3 and caspase 8, cleavage of poly ADP-ribose polymerase (PARP) and the release of cytochrome c. Berberine chloride decreases the expression of c-IAP1, Bcl-2 and Bcl-XL. Berberine chloride induces apoptosis with sustained phosphorylation of JNK and …	371.81	633-65-8	40	107.58	<1	N/A	http://selleckchem.com/products/Berberine-Hydrochloride.html	C20H18NO4.Cl	chloride	Natural Yellow 18 chloride	[Cl-].COC1=CC=C2C=C3C4=C(CC[N+]3=CC2=C1OC)C=C5OCOC5=C4	1.289	4	0	2
S2277	Caffeic Acid	h7	L8000-06	in 10mM DMSO	Lipoxygenase,TRP Channel	Transmembrane Transporters	Caffeic acid is a hydroxycinnamic acid, a naturally occurring organic compound. Caffeic acid is an inhibitor of both TRPV1 ion channel and 5-Lipoxygenase (5-LO).	180.16	331-39-5	36	199.82	<1	N/A	http://selleckchem.com/products/Caffeic-acid.html	C9H8O4	free base	N/A	OC(=O)/C=C/C1=CC=C(O)C(=C1)O	1.443	1	2	2
S2280	Chlorogenic Acid	a8	L8000-06	in 10mM DMSO	Others	Others	Chlorogenic acid (NSC 407296, Heriguard) is a hydroxycinnamic acid and a member of a family of naturally occurring organic compounds.	354.31	327-97-9	71	200.39	18	50.8	http://selleckchem.com/products/Chlorogenic-acid.html	C16H18O9	free base	NSC 407296, Heriguard	OC1CC(O)(CC(OC(=O)\C=C\C2=CC(=C(O)C=C2)O)C1O)C(O)=O	-0.34	3	4	5
S2283	Cinchonine(LA40221)	b8	L8000-06	in 10mM DMSO	5-alpha Reductase	Angiogenesis	Cinchonine (LA40221) is an alkaloid and a stereoisomer and pseudo-enantiomer of cinchonidine.	294.4	118-10-5	9	30.57	N/A	N/A	http://selleckchem.com/products/cinchonine.html	C19H22N2O	free base	N/A	OC(C1CC2CCN1CC2C=C)C3=CC=NC4=CC=CC=C34	2.75	1	1	3
S2284	Colchicine (NSC 757)	c8	L8000-06	in 10mM DMSO	Microtubule Associated	Cell Cycle	Colchicine (NSC 757, Colchineos, Colchisol, Colcin) is a microtubule polymerization inhibitor with an IC50 of 3 nM.	399.44	64-86-8	80	200.28	80	200.28	http://selleckchem.com/products/colchicine.html	C22H25NO6	free base	Colchineos, Colchisol, Colcin,NSC 757	COC1=CC=C2C(=CC1=O)C(CCC3=C2C(=C(OC)C(=C3)OC)OC)NC(C)=O	2.044	6	1	5
S2286	Cyclosporin A (NSC 290193)	d8	L8000-06	in 10mM DMSO	Antineoplastic and Immunosuppressive Antibiotics,Complement System,Immunology & Inflammation related,phosphatase	Immunology & Inflammation	Cyclosporin A (Cyclosporine A, Cyclosporine, Ciclosporin, CsA,NSC 290193) is an immunosuppressive agent, binds to the cyclophilin and then inhibits calcineurin with IC50 of 7 nM in a cell-free assay, widely used in organ transplantation to prevent rejection.	1202.61	59865-13-3	100	83.15	<1	N/A	http://selleckchem.com/products/Cyclosporin-A(Cyclosporine-A).html	C62H111N11O12	free base	Cyclosporine A, Cyclosporine, Ciclosporin, CsA,NSC 290193	CCC1NC(=O)C(C(O)C(C)C\C=C\C)N(C)C(=O)C(C(C)C)N(C)C(=O)C(CC(C)C)N(C)C(=O)C(CC(C)C)N(C)C(=O)C(C)NC(=O)C(C)NC(=O)C(CC(C)C)N(C)C(=O)C(NC(=O)C(CC(C)C)N(C)C(=O)CN(C)C1=O)C(C)C	4.333	11	5	15
S2287	Cytisine	e8	L8000-06	in 10mM DMSO	AChR	Neuronal Signaling	Cytisine (Baphitoxine, Sophorine) is a nicotinic acetylcholine receptor agonist.	190.24	485-35-8	38	199.75	38	199.75	http://selleckchem.com/products/Cytisine(Baphitoxine,-Sophorine).html	C11H14N2O	free base	Baphitoxine,Sophorine	O=C1C=CC=C2C3CNCC(C3)CN12	-0.338	1	1	0
S2289	Daidzin	f8	L8000-06	in 10mM DMSO	Dehydrogenase	Metabolism	Daidzin (Daidzoside, Daidzein 7-O-glucoside, Daidzein 7-glucoside), a natural organic compound in the class of phytochemicals known as isoflavones, is a potent and selective inhibitor of human mitochondrial aldehyde dehydrogenase and inhibits ALDH-I selectively (Ki=20 nM); at least 500 times less effective against ALDH-Ⅱ, the cytosolic isozyme (Ki=10 μM).	416.38	552-66-9	83	199.34	<1	N/A	http://selleckchem.com/products/Daidzin.html	C21H20O9	Free Base	Daidzoside, Daidzein 7-O-glucoside, Daidzein 7-glucoside	OCC1OC(OC2=CC3=C(C=C2)C(=O)C(=CO3)C4=CC=C(O)C=C4)C(O)C(O)C1O	0.452	4	5	4
S2290	Dihydroartemisinin (DHA)	g8	L8000-06	in 10mM DMSO	Apoptosis related,Autophagy,NF-κB	NF-κB	Dihydroartemisinin (DHA, Dihydroqinghaosu, β-Dihydroartemisinin, Artenimol) is a semi-synthetic derivative of artemisinin and isolated from the traditional Chinese herb Artemisia annua. Dihydroartemisinin induces autophagy and apoptosis by suppressing NF-κB activation.	284.35	71939-50-9	56	196.94	<1	N/A	http://selleckchem.com/products/Dihydroartemisinin(DHA).html	C15H24O5	free base	Dihydroqinghaosu, β-Dihydroartemisinin, Artenimol	CC1CCC2C(C)C(O)OC3OC4(C)CCC1C23OO4	1.621	4	0	0
S2295	Emodin	h8	L8000-06	in 10mM DMSO	Dehydrogenase	Metabolism	Emodin is a purgative resin, 6-methyl-1,3,8-trihydroxyanthraquinone, from rhubarb, the buckthorn and Japanese Knotweed (Fallopia japonica).	270.24	518-82-1	54	199.82	<1	N/A	http://selleckchem.com/products/Emodin.html	C15H10O5	free base	N/A	CC1=CC2=C(C(=C1)O)C(=O)C3=C(C=C(O)C=C3O)C2=O	2.568	2	3	0
S2296	Enoxolone	a9	L8000-06	in 10mM DMSO	Dehydrogenase	Metabolism	Enoxolone (Glycyrrhetin) is a pentacyclic triterpenoid derivative of the beta-amyrin type obtained from the hydrolysis of glycyrrhizic acid, which was obtained from the herb liquorice.	470.68	471-53-4	94	199.71	<1	N/A	http://selleckchem.com/products/Enoxolone(Glycyrrhetin).html	C30H46O4	free base	Glycyrrhetin	CC1(C)C(O)CCC2(C)C1CCC3(C)C2C(=O)C=C4C5CC(C)(CCC5(C)CCC34C)C(O)=O	5.656	2	1	1
S2299	Formononetin	b9	L8000-06	in 10mM DMSO	Others	Endocrinology & Hormones	Formononetin (Formononetol, Biochanin B) is a phytoestrogen from the root of Astragalus membranaceus and an O-methylated isoflavone.	268.26	485-72-3	54	201.3	<1	N/A	http://selleckchem.com/products/Formononetin(Formononetol).html	C16H12O4	free base	Formononetol, Biochanin B	COC1=CC=C(C=C1)C2=COC3=C(C=CC(=C3)O)C2=O	2.608	3	1	2
S2300	Ferulic Acid	c9	L8000-06	in 10mM DMSO	FGFR	Angiogenesis	Ferulic Acid (Fumalic) is a hydroxycinnamic acid and a type of organic compound found in the Ferula assafoetida L. or Ligusticum chuanxiong. Ferulic acid is a novel fibroblast growth factor receptor (FGFR) inhibitor with IC50s of 3.78 μM and 12.5 μM for FGFR1 and FGFR2, respectively.	194.19	1135-24-6	39	200.83	<1	N/A	http://selleckchem.com/products/Fumalic-acid(Ferulic-acid).html	C10H10O4	free base	Fumalic Acid	COC1=CC(=CC=C1O)\C=C\C(O)=O	1.669	2	1	3
S2302	Glycyrrhizin (NSC 167409)	d9	L8000-06	in 10mM DMSO	Dehydrogenase,High-mobility Group,MAO	Metabolism	Glycyrrhizin (NSC 167409, Glycyrrhizic Acid) is a direct HMGB1(high mobility group box 1) inhibitor that inhibits HMGB1-dependent inflammatory molecule expression and oxidative stress; modulates P38 and P-JNK but not p-ERK signalling; Also inhibits 11 beta-hydroxysteroid dehydrogenase and monoamine oxidase (MAO).	822.93	1405-86-3	100	121.52	<1	N/A	http://selleckchem.com/products/Glycyrrhizic-acid.html	C42H62O16	free base	N/A	CC1(C)C(CCC2(C)C1CCC3(C)C2C(=O)C=C4C5CC(C)(CCC5(C)CCC34C)C(O)=O)OC6OC(C(O)C(O)C6OC7OC(C(O)C(O)C7O)C(O)=O)C(O)=O	2.417	8	5	7
S2303	Gossypol Acetate	e9	L8000-06	in 10mM DMSO	Dehydrogenase	Metabolism	Gossypol Acetate (Gossypol Acetic acid, Pogosin, AT101) is a polyphenolic aldehyde that permeates cells and acts as an inhibitor for several dehydrogenase enzymes such as lactate dehydrogenase, NAD-linked enzymes.	578.61	12542-36-8	100	172.83	<1	N/A	https://www.selleckchem.com/products/gossypol-acetate.html	C32H34O10	Acetate	Gossypol Acetic acid, Pogosin, AT101	CC(C)C1=C2C=C(C)C(=C(O)C2=C(C=O)C(=C1O)O)C3=C(O)C4=C(C=C3C)C(=C(O)C(=C4C=O)O)C(C)C.CC(O)=O	6.388	3	6	5
S2304	Gramine	f9	L8000-06	in 10mM DMSO	ADC Cytotoxin,AdipoR,Adrenergic Receptor	Metabolism	Gramine (Donaxine) is a natural indole alkaloid isolated from giant reed, acts as an active adiponectin receptor (AdipoR) agonist, with IC50 of 3.2 µM and 4.2 µM for AdipoR2 and AdipoR1, respectively. Gramine is also a human and mouse β2-Adrenergic receptor (β2-AR) agonist.	174.24	87-52-5	35	200.87	<1	N/A	http://selleckchem.com/products/Gramine.html	C11H14N2	free base	N/A	CN(C)CC1=C[NH]C2=C1C=CC=C2	2.197	0	1	2
S2308	Hesperetin	g9	L8000-06	in 10mM DMSO	Histamine Receptor,TGF-beta/Smad	TGF-beta/Smad	Hesperetin is a bioflavonoid and, to be more specific, a flavanone.	302.27	520-33-2	60	198.5	<1	N/A	http://selleckchem.com/products/Hesperetin.html	C16H14O6	free base	N/A	COC1=CC=C(C=C1O)C2CC(=O)C3=C(O)C=C(O)C=C3O2	2.357	3	3	2
S2309	Hesperidin	h9	L8000-06	in 10mM DMSO	Others	Others	Hesperidin (Cirantin) is a flavanone glycoside found abundantly in citrus fruits.	610.56	520-26-3	100	163.78	<1	N/A	http://selleckchem.com/products/Hesperidin.html	C28H34O15	free base	Cirantin	COC1=CC=C(C=C1O)C2CC(=O)C3=C(O)C=C(OC4OC(COC5OC(C)C(O)C(O)C5O)C(O)C(O)C4O)C=C3O2	-0.431	7	8	7
S2310	Honokiol (NSC 293100)	a10	L8000-06	in 10mM DMSO	Akt,Antineoplastic and Immunosuppressive Antibiotics,Apoptosis related,Autophagy,HCV,MEK	PI3K/Akt/mTOR	Honokiol (NSC 293100) is the active principle of magnolia extract that inhibits Akt-phosphorylation and promotes ERK1/2 phosphorylation. Honokiol causes G0/G1 phase arrest, induces apoptosis, and autophagy via the ROS/ERK1/2 signaling pathway. Honokiol inhibits hepatitis C virus (HCV) infection. Phase 3.	266.33	35354-74-6	53	199	<1	N/A	http://selleckchem.com/products/Honokiol.html	C18H18O2	free base	N/A	OC1=C(CC=C)C=C(C=C1)C2=CC(=CC=C2O)CC=C	4.88	0	2	5
S2311	Hyodeoxycholic acid (HDCA)	b10	L8000-06	in 10mM DMSO	GPCR19	GPCR & G Protein	Hyodeoxycholic (HDCA, NSC 60672) acid is a secondary bile acid, one of the metabolic byproducts of intestinal bacteria.	392.57	83-49-8	78	198.69	<1	N/A	http://selleckchem.com/products/Hyodeoxycholic-acid(HDCA).html	C24H40O4	free base	NSC 60672	CC(CCC(O)=O)C1CCC2C3CC(O)C4CC(O)CCC4(C)C3CCC12C	4.014	1	2	4
S2314	Kaempferol (NSC 407289)	c10	L8000-06	in 10mM DMSO	Estrogen/progestogen Receptor,Fatty Acid Synthase	Endocrinology & Hormones	Kaempferol (NSC 407289, Robigenin), a natural flavonol, functions as an ERRα and ERRγ inverse agonist. It inhibits topoisomerase I catalyzed DNA religation and may also inhibit the activity of fatty acid synthase.	286.23	520-18-3	57	199.14	<1	N/A	http://selleckchem.com/products/Kaempferol.html	C15H10O6	free base	Robigenin	OC1=CC=C(C=C1)C2=C(O)C(=O)C3=C(O)C=C(O)C=C3O2	1.872	2	4	1
S2318	Lappaconitine	d10	L8000-06	in 10mM DMSO	Sodium Channel	Transmembrane Transporters	Lappaconitine (LC) is a natural diterpenoid alkaloid (DTA), acting as a human heart sodium channel blocker and possessing a wide range of biological activities, including anti-arrhythmic, anti-inflammatory, antioxidative, anticancer, epileptiform etc.	584.7	32854-75-4	16	27.36	N/A	N/A	http://selleckchem.com/products/lappaconitine.html	C32H44N2O8	free base	N/A	CCN1CC2(CCC(OC)C34C2CC(C13)C5(O)CC(OC)C6CC4C5(O)C6OC)OC(=O)C7=CC=CC=C7NC(C)=O	0.029	6	1	8
S2320	Luteolin	e10	L8000-06	in 10mM DMSO	ADC Cytotoxin,PDE	Metabolism	Luteolin (Luteoline, Luteolol, Digitoflavone) is a flavonoid found in Terminalia chebula, which is a non-selective phisphodiesterase PDE inhibitor for PDE1-5 with Ki of 15.0 μM, 6.4 μM, 13.9 μM, 11.1 μM and 9.5 μM, respectively.	286.24	491-70-3	57	199.13	<1	N/A	https://www.selleckchem.com/products/luteolin.html	C15H10O6	free base	Luteoline, Luteolol, Digitoflavone	OC1=CC(=C2C(=O)C=C(OC2=C1)C3=CC=C(O)C(=C3)O)O	2.168	2	4	1
S2321	Magnolol	f10	L8000-06	in 10mM DMSO	Fungal,NF-κB	NF-κB	Magnolol (NSC 293099) is a bioactive lignin found in the bark of the Houpu magnolia (Magnolia officinalis) which shows antifungal properties. It can block TNF-α-induced NF-KB activation.	266.33	528-43-8	53	199	<1	N/A	http://selleckchem.com/products/Magnolol(2,2-Bichavicol).html	C18H18O2	free base	NSC 293099	OC1=C(C=C(CC=C)C=C1)C2=CC(=CC=C2O)CC=C	4.88	0	2	5
S2322	(+)-Matrine	g10	L8000-06	in 10mM DMSO	Opioid Receptor	Neuronal Signaling	Matrine((+)-Matrine) is an alkaloid found in plants from the Sophora family, which has a variety of pharmacological effects, including anti-cancer effects, and action as a kappa opioid receptor agonist.	248.36	519-02-8	49	197.29	11	44.29	http://selleckchem.com/products/matrine.html	C15H24N2O	free base	N/A	O=C1CCCC2C3CCCN4CCCC(CN12)C34	1.417	1	0	0
S2325	Morin Hydrate	h10	L8000-06	in 10mM DMSO	Others	Others	Morin hydrate (Aurantica) is a flavonoid isolated from Maclura pomifera (Osage orange), Maclura tinctoria (old fustic) and from leaves of Psidium guajava (common guava).	320.25	6202-27-3	64	199.84	<1	N/A	https://www.selleckchem.com/products/Morin-hydrate.html	C15H10O7.H2O	Hydrate	Aurantica	O.OC1=CC=C(C(=C1)O)C2=C(O)C(=O)C3=C(O)C=C(O)C=C3O2	1.423	2	5	1
S2328	Nalidixic acid	a11	L8000-06	in 10mM DMSO	Selection Antibiotics for Transfected Cell,Topoisomerase	DNA Damage/DNA Repair	Nalidixic acid (NSC-82174) is a synthetic 1,8-naphthyridine antimicrobial agent with a limited bacteriocidal spectrum. It is an inhibitor of the A subunit of bacterial DNA gyrase.	232.24	389-08-2	6	25.84	<1	N/A	http://selleckchem.com/products/Nalidixic-acid(NegGram).html	C12H12N2O3	free base	NSC-82174	CCN1C=C(C(O)=O)C(=O)C2=C1N=C(C)C=C2	1.176	3	0	2
S2329	Naringin	b11	L8000-06	in 10mM DMSO	P450 (e.g. CYP17)	Metabolism	Naringin (Naringoside) is a flavanone glycoside, which exerts a variety of pharmacological effects such as antioxidant activity, blood lipid lowering, anticancer activity, and inhibition of cytochrome P450 enzymes.	580.53	10236-47-2	100	172.26	<1	N/A	http://selleckchem.com/products/Naringin(Naringoside).html	C27H32O14	free base	Naringoside	CC1OC(OC2C(O)C(O)C(CO)OC2OC3=CC(=C4C(=O)CC(OC4=C3)C5=CC=C(O)C=C5)O)C(O)C(O)C1O	-0.415	6	8	6
S2331	Neohesperidin Dihydrochalcone (Nhdc)	c11	L8000-06	in 10mM DMSO	Others	Others	Neohesperidin dihydrochalcone(Nhdc, NCI-c60764), sometimes abbreviated to neohesperidin DC or simply NHDC, is an artificial sweetener derived from citrus.	612.58	20702-77-6	100	163.24	<1	N/A	http://selleckchem.com/products/Neohesperidin-dihydrochalcone(Nhdc).html	C28H36O15	free base	NCI-c60764	COC1=C(O)C=C(CCC(=O)C2=C(O)C=C(OC3OC(CO)C(O)C(O)C3OC4OC(C)C(O)C(O)C4O)C=C2O)C=C1	-0.048	6	9	10
S2332	Neohesperidin	d11	L8000-06	in 10mM DMSO	ROS	Immunology & Inflammation	Neohesperidin (NSC 31048), a flavanone glycoside found in citrus fruits, is an antioxidant agent., Neohesperidin (NSC 31048) 是一种抗氧化剂，在1,1-diphenyl-2-picryldydrazyl（DPPH）自由基清除测定中，IC50为22.31 μg/ml。	610.56	13241-33-3	122	199.82	<1	N/A	http://selleckchem.com/products/Neohesperidin.html	C28H34O15	free base	NSC 31048	COC1=CC(=CC(=C1)C2CC(=O)C3=C(O)C=C(OC4OC(CO)C(O)C(O)C4OC5OC(C)C(O)C(O)C5O)C=C3O2)O	-0.431	7	8	7
S2334	Oleanolic Acid	e11	L8000-06	in 10mM DMSO	Antiviral	Microbiology	Oleanolic Acid (Caryophyllin) is a non-toxic, hepatoprotective triterpenoid found in Phytolacca Americana, which exerts antitumor and antiviral properties.	456.7	508-02-1	21	45.98	<1	N/A	http://selleckchem.com/products/Oleanolic-Acid(Caryophyllin).html	C30H48O3	free base	Caryophyllin	CC1(C)CC(C2CCC3(C)C(=CCC4C5(C)CCC(O)C(C)(C)C5CCC34C)C2C1)C(O)=O	6.282	1	1	1
S2336	Orotic acid (6-Carboxyuracil)	f11	L8000-06	in 10mM DMSO	Others	Others	Orotic acid(6-Carboxyuracil) is a heterocyclic compound and an acid.	156.1	65-86-1	2	12.81	<1	N/A	http://selleckchem.com/products/Orotic-acid(6-Carboxyuracil).html	C5H4N2O4	free base	N/A	OC(=O)C1=CC(=O)NC(=O)N1	-1.152	3	2	1
S2337	Osthole	g11	L8000-06	in 10mM DMSO	Others	Others	Osthol is an O-methylated coumarin, which is found in the plants such as Cnidium monnieri, Angelica archangelica and Angelica pubescens.	244.29	484-12-8	49	200.58	<1	N/A	http://selleckchem.com/products/Osthole(Osthol).html	C15H16O3	free base	Osthol	COC1=CC=C2C=CC(=O)OC2=C1CC=C(C)C	3.74	3	0	3
S2338	Oxymatrine	h11	L8000-06	in 10mM DMSO	Immunology & Inflammation related	TGF-beta/Smad	Oxymatrine (Matrine N-oxide) is a quinolizidine alkaloid extracted from the root of Sophora flavescens with anti-inflammatory, antifibrosis, and antitumor effects, inhibits the iNOS expression and TGF-β/Smad pathway. It is used for the treatment of viral hepatitis, cancer, viral myocarditis, gastrointestinal hemorrhage and skin diseases.	264.36	16837-52-8	53	200.48	53	200.48	http://selleckchem.com/products/Oxymatrine(Matrine-N-oxide).html	C15H24N2O2	free base	Matrine N-oxide	[O-][N+]12CCCC3CN4C(CCCC4=O)C(CCC1)C23	0.61	1	0	0
S2341	(-)-Parthenolide	a2	L8000-07	in 10mM DMSO	HDAC,MDM2/MDMX,NF-κB,p53	NF-κB	(-)-Parthenolide, an inhibitor of the Nuclear Factor-κB Pathway, specifically depletes HDAC1 protein without affecting other class I/II HDACs; Also promotes the ubiquitination of MDM2 and activates p53 cellular functions.	248.32	20554-84-1	49	197.33	<1	N/A	http://selleckchem.com/products/Parthenolide((-)-Parthenolide).html	C15H20O3	free base	N/A	CC/1=C\CCC2(C)OC2C3OC(=O)C(=C)C3CC1	2.923	3	0	0
S2344	Piperine	b2	L8000-07	in 10mM DMSO	P450 (e.g. CYP17)	Metabolism	Piperine (1-Piperoylpiperidine) is the alkaloid responsible for the pungency of black pepper and long pepper, which has also been used in some forms of traditional medicine and as an insecticide.	285.34	94-62-2	57	199.76	<1	N/A	http://selleckchem.com/products/Piperine(1-Piperoylpiperidine).html	C17H19NO3	free base	1-Piperoylpiperidine	O=C(\C=C\C=C\C1=CC2=C(OCO2)C=C1)N3CCCCC3	2.864	3	0	3
S2346	Puerarin	c2	L8000-07	in 10mM DMSO	5-HT Receptor	Neuronal Signaling	Puerarin (Kakonein), an isoflavones found in the root of Radix puerariae, is a 5-HT2C receptor and benzodiazepine site antagonist.	416.38	3681-99-0	86	206.54	<1	N/A	http://selleckchem.com/products/Puerarin(Kakonein).html	C21H20O9	free base	Kakonein	OCC1OC(OC2=C(O)C=CC3=C2OC=C(C3=O)C4=CC=C(O)C=C4)C(O)C(O)C1O	0.21	4	6	4
S2347	Quercetin Dihydrate	d2	L8000-07	in 10mM DMSO	PI3K,Sirtuin	PI3K/Akt/mTOR	Quercetin (Sophoretin), a polyphenolic flavonoid found in a wide variety of plant-based foods, such as apples, onions, berries, and red wine, is utilized in many different cultures for their nervous system and anticancer effects. Quercetin (dihydrate), a natural flavonoid, is a stimulator of recombinant SIRT1 and a PI3K inhibitor with IC50s of 2.4 μM, 3.0 μM and 5.4 μM for PI3K γ, PI3K δ and PI3K…	338.27	6151-25-3	67	198.07	<1	N/A	http://selleckchem.com/products/Quercetin-dihydrate(Sophoretin).html	C15H10O7.2H2O	Dihydrate	Sophoretin	O.O.OC1=CC(=C2C(=O)C(=C(OC2=C1)C3=CC=C(O)C(=C3)O)O)O	1.216	2	5	1
S2348	Rotenone (Barbasco)	e2	L8000-07	in 10mM DMSO	Apoptosis related,Mitochondrial Metabolism,Mitophagy,NADPH-oxidase,ROS	Immunology & Inflammation	Rotenone (Barbasco, Dactinol, Paraderil, Rotenon, Rotocide) is a botanical insecticide that is an inhibitor of mitochondrial electron transport. Rotenone inhibits NADH/DB oxidoreductase and NADH oxidase with IC50 of 28.8 nM and 5.1 nM, respectively. Rotenone induces apoptosis through enhancing mitochondrial reactive oxygen species production.	394.42	83-79-4	78	197.76	N/A	N/A	http://selleckchem.com/products/rotenone-barbasco.html	C23H22O6	free base	Barbasco, Dactinol, Paraderil, Rotenon, Rotocide	COC1=CC2=C(C=C1OC)C3C(CO2)OC4=C(C=CC5=C4CC(O5)C(C)=C)C3=O	3.93	6	0	3
S2349	Rutaecarpine	f2	L8000-07	in 10mM DMSO	COX	Neuronal Signaling	Rutaecarpine (Rutecarpine) is an indolopyridoquinazolinone alkaloid isolated from Evodia rutaecarpa and related herbs; a new class of COX-2 inhibitor.	287.32	84-26-4	24	83.53	<1	N/A	http://selleckchem.com/products/Rutaecarpine(Rutecarpine).html	C18H13N3O	free base	Rutecarpine	O=C1N2CCC3=C([NH]C4=C3C=CC=C4)C2=NC5=C1C=CC=C5	3.359	2	1	0
S2350	Rutin	g2	L8000-07	in 10mM DMSO	ADC Cytotoxin,Immunology & Inflammation related	Immunology & Inflammation	Rutin (Rutoside), a flavonol glycoside found in many plants including buckwheat; tobacco; forsythia; hydrangea; viola, etc., which possesses healthy effects for human.	610.52	153-18-4	100	163.79	<1	N/A	http://selleckchem.com/products/Rutin(Rutoside).html	C27H30O16	free base	Rutoside	CC1OC(OCC2OC(OC3=C(OC4=C(C(=CC(=C4)O)O)C3=O)C5=CC(=C(O)C=C5)O)C(O)C(O)C2O)C(O)C(O)C1O	-1.158	6	10	6
S2351	Salicin	h2	L8000-07	in 10mM DMSO	COX	Neuronal Signaling	Salicin (Salicoside, Salicine) is a phenol β-glycosid produced from willow bark that shows anti-inflammatory effects. It is a natural, non-selective COX-1 and COX-2 inhibitor.	286.28	138-52-3	57	199.11	24	83.83	http://selleckchem.com/products/Salicin(Salicoside,-Salicine).html	C13H18O7	free base	Salicoside,Salicine	OCC1OC(OC2=CC=CC=C2CO)C(O)C(O)C1O	-0.947	2	5	4
S2354	Sclareol	a3	L8000-07	in 10mM DMSO	Others	Others	Sclareol, a labdane-type diterpene isolated from clary sage (Salvia sclarea), exerts growth inhibition and cytotoxic activity against a variety of human cancer cell lines.	308.5	515-03-7	61	197.73	<1	N/A	http://selleckchem.com/products/Sclareol.html	C20H36O2	free base	N/A	CC1(C)CCCC2(C)C1CCC(C)(O)C2CCC(C)(O)C=C	4.27	0	0	4
S2357	Silibinin (NSC 651520)	b3	L8000-07	in 10mM DMSO	Others	Others	Silibinin (NSC 651520, Silybin, Silibinin A, Silymarin I, Flavobin), the main flavonoid extracted from the milk thistle Silybum marianum, displays hepatoprotective properties in acute and chronic liver injury.	482.44	22888-70-6	96	198.99	<1	N/A	http://selleckchem.com/products/Silibinin(Silybin).html	C25H22O10	free base	Silybin, Silibinin A, Silymarin I, Flavobin	COC1=CC(=CC=C1O)C2OC3=CC(=CC=C3OC2CO)C4OC5=CC(=CC(=C5C(=O)C4O)O)O	2.592	5	5	4
S2358	Silymarin	c3	L8000-07	in 10mM DMSO	Antioxidant	Angiogenesis	Silymarin (Silybin B), a polyphenolic flavonoid extracted from the seeds of Silybum marianum or milk thistle, is used in the prevention and treatment of liver diseases and primary liver cancer.	482.44	65666-07-1	96	198.99	<1	N/A	http://selleckchem.com/products/Silymarin(Silybin-B).html	C25H22O10	free base	Silybin B	COC1=CC(=CC=C1O)C2OC3=CC=C(C=C3OC2CO)C4OC5=C(C(=CC(=C5)O)O)C(=O)C4O	2.592	5	5	4
S2362	Synephrine	d3	L8000-07	in 10mM DMSO	Adrenergic Receptor	GPCR & G Protein	Synephrine (Oxedrine), a natural protoalkaloid in the extract of bitter orange and other citrus species, is commonly used for weight loss.	167.21	94-07-5	33	197.36	<1	N/A	http://selleckchem.com/products/Synephrine(Oxedrine).html	C9H13NO2	free base	Oxedrine	CNCC(O)C1=CC=C(O)C=C1	0.615	0	3	3
S2364	Tanshinone I	e3	L8000-07	in 10mM DMSO	Phospholipase (e.g. PLA)	Metabolism	Tanshinone I, an active principle isolated from Salvia miltiorrhiza (Danshen), is structurally similar to tanshinone IIA and may possess similar cytotoxic effects on tumor cells.	276.29	568-73-0	23	83.25	<1	N/A	http://selleckchem.com/products/Tanshinone-I.html	C18H12O3	free base	N/A	CC1=COC2=C1C(=O)C(=O)C3=C2C=CC4=C(C)C=CC=C34	4.084	3	0	0
S2365	Tanshinone IIA	f3	L8000-07	in 10mM DMSO	Lipase	Metabolism	Tanshinone IIA (Tanshinone B) is the most abundant diterpene quinone in Danshen, Salviae miltiorrhizae Radix, a widely prescribed traditional herbal medicine that is used to treat cardiovascular and inflammatory diseases; A natural monoacylglycerol lipase inhibitor.	294.34	568-72-9	5	16.99	<1	N/A	http://selleckchem.com/products/Tanshinone-IIA(Tanshinone-B).html	C19H18O3	free base	Tanshinone B	CC1=COC2=C1C(=O)C(=O)C3=C2C=CC4=C3CCCC4(C)C	4.66	3	0	0
S2366	Taxifolin (Dihydroquercetin)	g3	L8000-07	in 10mM DMSO	VEGFR	Angiogenesis	Taxifolin, type I inhibitor for VEGFR-2 kinase, is a flavonoid in many plants such as Taxus chinensis, Siberian larch, Cedrus deodara and so on.	304.25	480-18-2	60	197.21	<1	N/A	http://selleckchem.com/products/Taxifolin(Dihydroquercetin).html	C15H12O7	free base	N/A	OC1C(OC2=CC(=CC(=C2C1=O)O)O)C3=CC(=C(O)C=C3)O	1.479	2	5	1
S2369	Troxerutin	h3	L8000-07	in 10mM DMSO	NLR,ROS	Immunology & Inflammation	Troxerutin, a natural bioflavonoid isolated from Sophora japonica, has been reported to have many benefits and medicinal properties. Troxerutin, also known as vitamin P4, is a tri-hydroxyethylated derivative of natural bioflavonoid rutins which can inhibit the production of reactive oxygen species (ROS) and depress ER stress-mediated NOD activation.	742.68	7085-55-4	100	134.65	100	134.65	http://selleckchem.com/products/Troxerutin.html	C33H42O19	free base	N/A	CC1OC(OCC2OC(OC3=C(OC4=CC(=CC(=C4C3=O)O)OCCO)C5=CC(=C(OCCO)C=C5)OCCO)C(O)C(O)C2O)C(O)C(O)C1O	-2.1	9	10	15
S2370	Ursolic Acid	a4	L8000-07	in 10mM DMSO	Others	Others	Ursolic acid (NSC 167406, NSC-4060, Prunol, Urson, Malol) is a pentacyclic triterpene acid, used in cosmetics.	456.7	77-52-1	91	199.26	<1	N/A	http://selleckchem.com/products/Ursolic-acid(Malol).html	C30H48O3	free base	NSC 167406, NSC-4060, Prunol, Urson, Malol	CC1CC(C2CCC3(C)C(=CCC4C5(C)CCC(O)C(C)(C)C5CCC34C)C2C1C)C(O)=O	6.327	1	1	1
S2375	Aloin	b4	L8000-07	in 10mM DMSO	Tyrosinase	Proteases	Aloin (Barbaloin, Barbalin), a natural anthracycline from Aloe vera, is a tyrosinase inhibitor.	418.39	1415-73-2	83	198.38	83	198.38	http://selleckchem.com/products/Aloin(Barbaloin).html	C21H22O9	free base	Barbaloin, Barbalin	OCC1OC(C(O)C(O)C1O)C2C3=C(C(=CC=C3)O)C(=O)C4=C2C=C(CO)C=C4O	-0.404	2	7	3
S2376	Ammonium Glycyrrhizinate	c4	L8000-07	in 10mM DMSO	Dehydrogenase,High-mobility Group	Metabolism	Ammonium Glycyrrhizinate (AMGZ, Glycyram, Glycyrrhizin ammonium salt, Glycyrrhizic acid ammonium salt) is a unique product from Licorice root with a very high sweetness. Ammonium glycyrrhizinate is a direct inhibitor of HMGB1 with anti-inflammatory, anti-tumor, anti-diabetic activities. Ammonium Glycyrrhizinate inhibits growth and cytopathology of several unrelated DNA and RNA viruses. Ammonium G…	839.96	1407-03-0	168	200.01	5	5.95	http://selleckchem.com/products/Ammonium-Glycyrrhizinate(AMGZ).html	C42H62O16.NH3	Glycyrrhizic acid salt	AMGZ, Glycyram, Glycyrrhizin ammonium salt, Glycyrrhizic acid ammonium salt	N.CC1(C)C(CCC2(C)C1CCC3(C)C2C(=O)C=C4C5CC(C)(CCC5(C)CCC34C)C(O)=O)OC6OC(C(O)C(O)C6OC7OC(C(O)C(O)C7O)C(O)=O)C(O)=O	-0.915	8	5	7
S2378	Butylscopolamine Bromide	d4	L8000-07	in 10mM DMSO	AChR	Neuronal Signaling	Butylscopolamine Bromide (Scopolamine Butylbromide,(-)-Scopolamine butylbromide, Hyoscine butylbromide), is a peripherally acting antimuscarinic, anticholinergic agent used as an abdominal-specific antispasmodic.	440.37	149-64-4	88	199.83	88	199.83	http://selleckchem.com/products/butylscopolamine-bromide.html	C21H30NO4.Br	Bromide	Scopolamine Butylbromide,(-)-Scopolamine butylbromide, Hyoscine butylbromide	[Br-].CCCC[N+]1(C)C2CC(CC1C3OC23)OC(=O)C(CO)C4=CC=CC=C4	-1.62	3	1	8
S2379	Dioscin	e4	L8000-07	in 10mM DMSO	Others	Others	Dioscin (Collettiside III, Saponin) is a saponin extracted and isolated from Polygonatum Zanlanscianense Pamp, showing antitumor activities.	869.04	19057-60-4	100	115.07	<1	N/A	http://selleckchem.com/products/Dioscin(Collettiside-III).html	C45H72O16	free base	Collettiside III, Saponin	CC1CCC2(OC1)OC3CC4C5CC=C6CC(CCC6(C)C5CCC4(C)C3C2C)OC7OC(CO)C(OC8OC(C)C(O)C(O)C8O)C(O)C7OC9OC(C)C(O)C(O)C9O	1.169	8	8	7
S2380	Diosmetin	f4	L8000-07	in 10mM DMSO	P450 (e.g. CYP17)	Metabolism	Diosmetin (Luteolin 4-methyl ether) is a bioflavonoid found in spearmint, oregano, and many other plants.	300.26	520-34-3	60	199.83	<1	N/A	http://selleckchem.com/products/Diosmetin(Luteolin-4-methyl-ether).html	C16H12O6	free base	Luteolin 4-methyl ether	COC1=CC=C(C=C1O)C2=CC(=O)C3=C(O)C=C(O)C=C3O2	2.394	3	3	2
S2382	Evodiamine	g4	L8000-07	in 10mM DMSO	NF-κB	NF-κB	Evodiamine (Isoevodiamine), an alkaloid extract from the fruit of Evodiae Fructus exhibits antitumor activities against the human tumor cells. It is shown to inhibit NF-kB activation through suppression of IkB kinase activity.	303.36	518-17-2	12	39.56	<1	N/A	http://www.selleck.cn/products/Evodiamine(Isoevodiamine).html	C19H17N3O	Free Base	Isoevodiamine	CN1C2N(CCC3=C2[NH]C4=CC=CC=C34)C(=O)C5=C1C=CC=C5	3.673	1	1	0
S2383	Gastrodin	h4	L8000-07	in 10mM DMSO	Immunology & Inflammation related	Immunology & Inflammation	Gastrodin (Gastrodine), an anti-inflammatory polyphenol extracted from Chinese natural herbal Gastrodia elata Blume., benefits neurodegenerative diseases.	286.28	62499-27-8	50	174.65	<1	N/A	http://selleckchem.com/products/Gastrodin(Gastrodine).html	C13H18O7	free base	Gastrodine	OCC1OC(OC2=CC=C(CO)C=C2)C(O)C(O)C1O	-0.947	2	5	4
S2386	Indirubin (NSC 105327)	a5	L8000-07	in 10mM DMSO	GSK-3	PI3K/Akt/mTOR	Indirubin (NSC 105327) is a potent cyclin-dependent kinases and GSK-3β inhibitor with IC50 of about 5 μM and 0.6 μM.	262.26	479-41-4	53	202.09	<1	N/A	http://selleckchem.com/products/Indirubin.html	C16H10N2O2	free base	NSC 105327	O=C1NC2=CC=CC=C2\C1=C3/NC4=C(C=CC=C4)C3=O	1.876	2	2	0
S2387	Lappaconite HBr	b5	L8000-07	in 10mM DMSO	ADC Cytotoxin,Immunology & Inflammation related	Immunology & Inflammation	Lappaconite Hydrobromide is a kind of alkaloid extracted from Aconitum sinomontanum Nakai and has anti-inflammatory effects.	665.61	97792-45-5	28	42.07	<1	N/A	http://selleckchem.com/products/Lappaconite-Hydrobromide.html	C32H44N2O8.HBr	Hydrobromide	N/A	Br.CCN1CC2(CCC(OC)C34C2CC(C13)C5(O)CC(OC)C6CC4C5(O)C6OC)OC(=O)C7=C(NC(C)=O)C=CC=C7	0.52	6	1	8
S2388	L-carnitine	c5	L8000-07	in 10mM DMSO	Others	Others	L-carnitine (Levocarnitine,Carnitor, vitamin BT, Karnitin,L(-)-Carnitine) is constituent of striated muscle and liver. It is used therapeutically to stimulate gastric and pancreatic secretions and in the treatment of hyperlipoproteinemias.	161.2	541-15-1	12	74.44	32	198.51	http://selleckchem.com/products/L-carnitine(Levocarnitine).html	C7H15NO3	quaternary-N salt	Levocarnitine,Carnitor, vitamin BT, Karnitin,L(-)-Carnitine	C[N+](C)(C)CC(O)CC([O-])=O	-3.29	0	1	4
S2389	Naringin Dihydrochalcone	d5	L8000-07	in 10mM DMSO	P450 (e.g. CYP17)	Metabolism	Naringin Dihydrochalcone(Naringin DC) is a new-style sweetening agent and an artificial sweetener derived from naringin and also an inhibitor of CYP enzymes.	582.55	18916-17-1	100	171.66	<1	N/A	http://selleckchem.com/products/Naringin-Dihydrochalcone(Naringin-DC).html	C27H34O14	free base	N/A	CC1OC(OC2C(O)C(O)C(CO)OC2OC3=CC(=C(C(=O)CCC4=CC=C(O)C=C4)C(=C3)O)O)C(O)C(O)C1O	-0.032	5	9	9
S2390	Polydatin	e5	L8000-07	in 10mM DMSO	Phospholipase (e.g. PLA)	Metabolism	Polydatin (Piceid) is a crystal component extracted from the root stem of perennial herbage Polygonum Cuspidatum Sieb.et Zucc.	390.38	65914-17-2	78	199.81	<1	N/A	http://selleckchem.com/products/Polydatin(Piceid).html	C20H22O8	free base	Piceid	OCC1OC(OC2=CC(=CC(=C2)\C=C\C3=CC=C(O)C=C3)O)C(O)C(O)C1O	1.16	2	6	5
S2391	Quercetin (NSC 9221)	f5	L8000-07	in 10mM DMSO	Apoptosis related,Autophagy,Mitophagy,PI3K,PKC,Sirtuin,Src	Epigenetics	Quercetin (NSC 9221, Sophoretin, C.I. 75720), a natural flavonoid present in vegetables, fruit and wine, is a stimulator of recombinant SIRT1 and also a PI3K inhibitor with IC50 of 2.4-5.4 μM. Quercetin induces mitophagy, apoptosis and protective autophagy. Phase 4.	302.24	117-39-5	61	201.83	<1	N/A	http://selleckchem.com/products/Quercetin(Sophoretin).html	C15H10O7	Free Base	Sophoretin, C.I. 75720	OC1=CC(=C2C(=O)C(=C(OC2=C1)C3=CC=C(O)C(=C3)O)O)O	1.63	2	5	1
S2396	Salidroside	g5	L8000-07	in 10mM DMSO	Mitophagy,mTOR,PREP	PI3K/Akt/mTOR	Salidroside (Rhodioloside), a phenylpropanoid glycoside isolated from Rhodiola rosea, has been reported to have a broad spectrum of pharmacological properties. Salidroside is a prolyl endopeptidase inhibitor. Salidroside alleviates cachexia symptoms in mouse models of cancer cachexia via activating mTOR signalling. Salidroside protects dopaminergic neurons by enhancing PINK1/Parkin-mediated mitop…	300.3	10338-51-9	60	199.8	60	199.8	http://selleckchem.com/products/Salidroside-Rhodioloside.html	C14H20O7	free base	Rhodioloside	OCC1OC(OCCC2=CC=C(O)C=C2)C(O)C(O)C1O	-0.443	2	5	5
S2397	Palmatine chloride	h5	L8000-07	in 10mM DMSO	Calcium Channel	Neuronal Signaling	Palmatine hydrochloride (Palmatine chloride (6CI,7CI); Fibrauretin) is a hydrochloride salt of palmatine which is a protoberberine alkaloid.	387.86	10605-02-4	77	198.53	5	12.89	http://selleckchem.com/products/Palmatine-chloride.html	C21H22NO4.Cl	Chloride	N/A	[Cl-].COC1=CC=C2C=C3C4=C(CC[N+]3=CC2=C1OC)C=C(OC)C(=C4)OC	1.488	4	0	4
S2401	Sodium Danshensu	a6	L8000-07	in 10mM DMSO	P450 (e.g. CYP17)	Metabolism	Sodium Danshensu is a mono sodium of danshensu, which is a natural phenolic acid of caffeic acid derivatives isolated from Salvia miltiorrhiza.	220.15	67920-52-9	7	31.8	2	9.08	http://selleckchem.com/products/Sodium-Danshensu.html	C9H9O5.Na	Sodium Salt	N/A	[Na+].OC(CC1=CC(=C(O)C=C1)O)C([O-])=O	-0.795	0	3	3
S2403	Tetrandrine (NSC-77037)	b6	L8000-07	in 10mM DMSO	Calcium Channel	Transmembrane Transporters	Tetrandrine (NSC-77037, Fanchinine, d-Tetrandrine), a bis-benzylisoquinoline alkaloid derived from Stephania tetrandra, is a calcium channel blocker.	622.75	518-34-3	7	11.24	<1	N/A	http://www.selleck.cn/products/Tetrandrine-Fanchinine.html	C38H42N2O6	Free Base	Fanchinine, d-Tetrandrine	COC1=CC=C2CC3N(C)CCC4=CC(=C(OC)C(=C34)OC5=C(OC)C=C6CCN(C)C(CC7=CC=C(OC1=C2)C=C7)C6=C5)OC	7.218	6	0	4
S2422	Ipriflavone (Osteofix)	c6	L8000-07	in 10mM DMSO	Others	Others	Ipriflavone (7-Isopropoxyisoflavon) is used to inhibit bone resorption.	280.32	35212-22-7	56	199.77	<1	N/A	http://selleckchem.com/products/ipriflavone.html	C18H16O3	free base	N/A	CC(C)OC1=CC=C2C(=C1)OC=C(C2=O)C3=CC=CC=C3	3.576	3	0	3
S2423	(S)-10-Hydroxycamptothecin	d6	L8000-07	in 10mM DMSO	Topoisomerase	DNA Damage/DNA Repair	(S)-10-Hydroxycamptothecin (10-HCPT) is a DNA topoisomerase I inhibitor with potent anti-tumor activity.	364.35	19685-09-7	8	21.96	<1	N/A	http://selleckchem.com/products/10-hydroxycamptothecin.html	C20H16N2O5	free base	10-HCPT	CCC1(O)C(=O)OCC2=C1C=C3N(CC4=CC5=CC(=CC=C5N=C34)O)C2=O	1.504	4	1	1
S2438	Synephrine HCl	e6	L8000-07	in 10mM DMSO	Adrenergic Receptor	Neuronal Signaling	SynephrineHCl (Oxedrine, p-Synephrine) is a sympathomimetic α-adrenergic receptor (AR) agonist.	203.67	5985-28-4	14	68.74	41	201.31	http://selleckchem.com/products/synephrine-hcl.html	C9H13NO2.HCl	Hydrochloride	N/A	Cl.CNCC(O)C1=CC=C(O)C=C1	0.997	0	3	3
S2439	Guanosine	f6	L8000-07	in 10mM DMSO	Nucleoside Analog/Antimetabolite	DNA Damage/DNA Repair	Guanosine is a purine nucleoside comprising guanine attached to a ribose (ribofuranose) ring via a β-N9-glycosidic bond.	283.24	118-00-3	56	197.71	<1	N/A	http://selleckchem.com/products/guanosine.html	C10H13N5O5	free base	N/A	NC1=NC2=C(N=C[N]2C3OC(CO)C(O)C3O)C(=O)N1	-2.38	4	5	2
S2443	Tolbutamide (HLS 831)	g6	L8000-07	in 10mM DMSO	Potassium Channel	Transmembrane Transporters	Tolbutamide (HLS 831) is an inhibitor of potassium channel, used for type II diabetes.	270.35	64-77-7	54	199.74	<1	N/A	http://selleckchem.com/products/tolbutamide.html	C12H18N2O3S	free base	HLS 831	CCCCNC(=O)N[S](=O)(=O)C1=CC=C(C)C=C1	2.336	3	2	5
S2450	Equol	h6	L8000-07	in 10mM DMSO	Estrogen/progestogen Receptor	Endocrinology & Hormones	Equol ,a metabolite of soybeans, is an important isoflavone in humans，specifically binds to 5α-DHT, has a modest affinity for recombinant estrogen receptor ERβ. Phase 2.	242.27	531-95-3	48	198.13	<1	N/A	http://selleckchem.com/products/equol.html	C15H14O3	free base	N/A	OC1=CC=C(C=C1)C2COC3=CC(=CC=C3C2)O	3.211	1	2	1
S2455	Bethanechol chloride	a7	L8000-07	in 10mM DMSO	AChR	Neuronal Signaling	Bethanechol chloride(Myocholine,Urecholine) is a selective muscarinic receptor agonist without any effect on nicotinic receptors.	196.68	590-63-6	39	198.29	39	198.29	http://selleckchem.com/products/Carbamyl-beta-methylcholine-chloride(Bethanechol-chloride).html	C7H17N2O2.Cl	quaternary-N Chloride salt	Myocholine,Urecholine	[Cl-].CC(C[N+](C)(C)C)OC(N)=O	-3.702	2	1	4
S2456	Chlorpromazine HCl	b7	L8000-07	in 10mM DMSO	Dopamine Receptor,Potassium Channel	Neuronal Signaling	Chlorpromazine HCl (Sonazine) is a dopamine and potassium channel inhibitor with IC50 of 6.1 and 16 μM for inward-rectifying K+ currents and time-independent outward currents.	355.33	69-09-0	71	199.81	71	199.81	http://selleckchem.com/products/Chlorpromazine-hydrochloride(Sonazine).html	C17H19ClN2S.HCl	Hydrochloride	Sonazine	Cl.CN(C)CCCN1C2=C(SC3=C1C=C(Cl)C=C3)C=CC=C2	5.121	0	0	4
S2458	Clonidine HCl	c7	L8000-07	in 10mM DMSO	Adrenergic Receptor,Autophagy	Neuronal Signaling	Clonidine HCl(Kapvay) is a direct-acting α2 adrenergic agonist with an ED50 of 0.02±0.01 mg/kg.	266.5	4205-91-8	53	198.87	53	198.87	http://selleckchem.com/products/Clonidine-hydrochloride(Catapres).html	C9H9Cl2N3.HCl	Hydrochloride	Kapvay	Cl.ClC1=C(NC2=NCCN2)C(=CC=C1)Cl	2.736	1	2	2
S2461	Domperidone	d7	L8000-07	in 10mM DMSO	Dopamine Receptor	Neuronal Signaling	Domperidone is an oral dopamine D2 receptor antagonist, used to treat nausea and vomiting.	425.91	57808-66-9	48	112.7	<1	N/A	http://selleckchem.com/products/Domperidone(Motilium).html	C22H24ClN5O2	free base	N/A	ClC1=CC2=C(C=C1)N(C3CCN(CCCN4C(=O)NC5=C4C=CC=C5)CC3)C(=O)N2	2.453	2	2	5
S2466	Estriol	e7	L8000-07	in 10mM DMSO	Estrogen/progestogen Receptor	Endocrinology & Hormones	Estriol (NSC-12169) is an antagonist of the G-protein coupled estrogen receptor in estrogen receptor-negative breast cancer cells.	288.39	50-27-1	57	197.65	<1	N/A	http://selleckchem.com/products/Estriol(Oestriol).html	C18H24O3	free base	NSC-12169	CC12CCC3C(CCC4=CC(=CC=C34)O)C1CC(O)C2O	2.871	0	3	0
S2467	Famciclovir	f7	L8000-07	in 10mM DMSO	Antiviral	Microbiology	Famciclovir (BRL-42810) is a guanine analogue antiviral drug used for the treatment of various herpesvirus infections.	321.34	104227-87-4	64	199.17	64	199.17	http://selleckchem.com/products/Famciclovir(Famvir).html	C14H19N5O4	free base	BRL-42810	CC(=O)OCC(CC[N]1C=NC2=CN=C(N)N=C12)COC(C)=O	-0.294	7	1	9
S2468	Fenbendazole	g7	L8000-07	in 10mM DMSO	Parasite	Microbiology	Fenbendazole(Fenbendazol,Phenbendasol) is a broad spectrum benzimidazole anthelmintic used against gastrointestinal parasites with an IC50 of about 0.01 μg/mL.	299.35	43210-67-9	4	13.36	<1	N/A	http://selleckchem.com/products/Fenbendazole(Panacur).html	C15H13N3O2S	free base	Fenbendazol,Phenbendasol	COC(=O)NC1=NC2=C([NH]1)C=C(SC3=CC=CC=C3)C=C2	3.769	3	2	4
S2470	Fluocinolone Acetonide	h7	L8000-07	in 10mM DMSO	Glucocorticoid Receptor	Endocrinology & Hormones	Fluocinolone Acetonide (Flucort-N) is a corticosteroid that binds to the cytosolic glucocorticoid receptor.	452.5	67-73-2	90	198.9	<1	N/A	http://selleckchem.com/products/Fluocinolone-acetonide(Flucort-N).html	C24H30F2O6	free base	Flucort-N	CC1(C)OC2CC3C4CC(F)C5=CC(=O)C=CC5(C)C4(F)C(O)CC3(C)C2(O1)C(=O)CO	0.995	4	2	2
S2471	Gallamine Triethiodide	a8	L8000-07	in 10mM DMSO	AChR	Neuronal Signaling	Gallamine Triethiodide is a cholinergic receptor blocker with an IC50 of 68.0 ± 8.4 μM.	891.53	65-29-2	100	112.17	100	112.17	http://selleckchem.com/products/Gallamine-triethiodide(Flaxedil).html	C30H60I3N3O3	tri-quaternary-N iodide salt	N/A	[I-].[I-].[I-].CC[N+](CC)(CC)CCOC1=C(OCC[N+](CC)(CC)CC)C(=CC=C1)OCC[N+](CC)(CC)CC	-8.065	3	0	21
S2473	Hexestrol	b8	L8000-07	in 10mM DMSO	Estrogen/progestogen Receptor	Endocrinology & Hormones	Hexestrol (Bibenzyl) binds to ERα and ERβ with EC50 of 0.07 nM and 0.175 nM, respectively.	270.37	84-16-2	42	155.34	<1	N/A	http://selleckchem.com/products/Hexestrol(Bibenzyl).html	C18H22O2	free base	Bibenzyl	CCC(C(CC)C1=CC=C(O)C=C1)C2=CC=C(O)C=C2	5.192	0	2	5
S2475	Imatinib (STI571)	c8	L8000-07	in 10mM DMSO	Autophagy,Bcr-Abl,c-Kit,PDGFR	Protein Tyrosine Kinase	Imatinib (STI571,Gleevec, Glivec, CGP057148B) is a multi-target inhibitor of tyrosine kinase with inhibition for v-Abl, c-Kit and PDGFR, IC50 values are 0.6 μM, 0.1 μM and 0.1 μM in cell-free or cell-based assays, respectively. Imatinib (STI571) induces autophagy.	493.6	152459-95-5	33	66.86	<1	N/A	http://selleckchem.com/products/Imatinib(STI571).html	C29H31N7O	free base	STI571,Gleevec, Glivec, CGP057148B	CN1CCN(CC1)CC2=CC=C(C=C2)C(=O)NC3=CC=C(C)C(=C3)NC4=NC=CC(=N4)C5=CC=CN=C5	4.22	4	2	7
S2480	Loperamide HCl	d8	L8000-07	in 10mM DMSO	Autophagy,Opioid Receptor	Neuronal Signaling	Loperamide HCl (ADL 2-1294,R-18553 hydrochloride) is a selective μ-opioid receptor agonist opioid with Ki of 3.3 nM, 15-fold and 350-fold selective over the δ subtype and the κ subtype of the opioid receptor, used against diarrhea resulting from gastroenteritis or inflammatory bowel disease.	513.5	34552-83-5	22	42.84	<1	N/A	http://selleckchem.com/products/Loperamide-hydrochloride.html	C29H33ClN2O2.HCl	Hydrochloride	ADL 2-1294,R-18553 hydrochloride	Cl.CN(C)C(=O)C(CCN1CCC(O)(CC1)C2=CC=C(Cl)C=C2)(C3=CC=CC=C3)C4=CC=CC=C4	5.017	1	0	7
S2481	Manidipine	e8	L8000-07	in 10mM DMSO	Calcium Channel	Transmembrane Transporters	Manidipine(CV-4093,(±)-Manidipine) is a calcium channel blocker (dihydropyridine type) that is used clinically as an antihypertensive.	610.7	89226-50-6	122	199.77	<1	N/A	http://selleckchem.com/products/Manidipine(Manyper).html	C35H38N4O6	free base	CV-4093,(±)-Manidipine	COC(=O)C1=C(C)NC(=C(C1C2=CC=CC(=C2)[N+]([O-])=O)C(=O)OCCN3CCN(CC3)C(C4=CC=CC=C4)C5=CC=CC=C5)C	5.058	4	1	12
S2484	Milrinone	f8	L8000-07	in 10mM DMSO	PDE	Metabolism	Milrinone (Win 47203,Primacor) is a phosphodiesterase 3 (PDE3) inhibitor, used to increase the heart's contractility.	211.22	78415-72-2	42	198.84	<1	N/A	http://selleckchem.com/products/Milrinone(Primacor).html	C12H9N3O	free base	Win 47203,Primacor	CC1=C(C=C(C#N)C(=O)N1)C2=CC=NC=C2	0.356	2	1	1
S2485	Mitoxantrone (NSC-301739) 2HCl	g8	L8000-07	in 10mM DMSO	Apoptosis related,COVID-19,PKC,Topoisomerase	DNA Damage/DNA Repair	Mitoxantrone 2HCl (NSC-301739) is a dihydrochloride salt of Mitoxantrone. Mitoxantrone is an inhibitor of type II topoisomerase and protein kinase C (PKC) with IC50 of 8.5 μM for PKC. Mitoxantrone inhibits cell proliferative growth of MCF-7/wt cells with IC50 of 0.42 μM. Mitoxantrone also induces apoptosis.	517.4	70476-82-3	89	172.01	89	172.01	http://selleckchem.com/products/Mitoxantrone-Hydrochloride.html	C22H29ClN4O6.2HCl	Dihydrochloride	NSC-301739 2HCl	Cl.Cl.OCCNCCNC1=CC=C(NCCNCCO)C2=C1C(=O)C3=C(O)C=CC(=C3C2=O)O	0.832	2	8	12
S2486	Moroxydine HCl	h8	L8000-07	in 10mM DMSO	Antiviral	Microbiology	Moroxydine HCl(ABOB hydrochloride) is a synthetic antiviral compound chemically belonging to the series of the heterocyclic biguanidines.	207.66	3160-91-6	42	202.25	42	202.25	http://selleckchem.com/products/Moroxydine-hydrochloride.html	C6H13N5O.HCl	Hydrochloride	ABOB hydrochloride	Cl.NC(=N)NC(=N)N1CCOCC1	-0.672	1	2	3
S2487	Mycophenolic acid	a9	L8000-07	in 10mM DMSO	Antineoplastic and Immunosuppressive Antibiotics,Dehydrogenase,Selection Antibiotics for Transfected Cell	Metabolism	Mycophenolic acid (Mycophenolate, RS-61443) is a potent IMPDH inhibitor and the active metabolite of an immunosuppressive drug, used to prevent rejection in organ transplantation.	320.34	24280-93-1	64	199.79	<1	N/A	http://selleckchem.com/products/Mycophenolic-acid(Mycophenolate).html	C17H20O6	free base	Mycophenolate, RS-61443	COC1=C(C)C2=C(C(=C1C\C=C(/C)CCC(O)=O)O)C(=O)OC2	3.157	4	1	6
S2489	Nateglinide	b9	L8000-07	in 10mM DMSO	Potassium Channel	Transmembrane Transporters	Nateglinide (Starlix,A-4166,SDZ DJN 608) is an insulin secretagog agent that lowers blood glucose levels by stimulating insulin secretion from the pancreas.	317.42	105816-04-4	63	198.48	<1	N/A	http://selleckchem.com/products/Nateglinide(Starlix).html	C19H27NO3	free base	Starlix,A-4166,SDZ DJN 608	CC(C)C1CCC(CC1)C(=O)NC(CC2=CC=CC=C2)C(O)=O	3.981	2	1	6
S2492	Novobiocin Sodium (NSC 2382)	c9	L8000-07	in 10mM DMSO	Antineoplastic and Immunosuppressive Antibiotics,Topoisomerase	DNA Damage/DNA Repair	Novobiocin Sodium (NSC 2382, Albamycin, Cathomycin) is an aminocoumarin antibiotic that targets bacterial DNA gyrase (TopoIV), used to treat susceptible gram positive bacteria.	634.61	1476-53-5	100	157.58	100	157.58	http://selleckchem.com/products/Novobiocin-sodium(Albamycin).html	C31H35N2O11.Na	Sodium Salt	Albamycin,Cathomycin,NSC 2382	[Na+].COC1C(OC(N)=O)C(O)C(OC2=CC=C3C(=C(NC(=O)C4=CC=C([O-])C(=C4)CC=C(C)C)C(=O)OC3=C2C)O)OC1(C)C	2.747	8	4	9
S2493	Olanzapine	d9	L8000-07	in 10mM DMSO	5-HT Receptor,Dopamine Receptor	Neuronal Signaling	Olanzapine (LY170053,Zyprexa, Zalasta, Zolafren, Olzapin, Oferta, Zypadhera) is a high affinity for 5-HT2 serotonin and D2 dopamine receptor antagonist.	312.44	132539-06-1	62	198.44	<1	N/A	http://selleckchem.com/products/Olanzapine(Zyprexa).html	C17H20N4S	free base	LY170053,Zyprexa, Zalasta, Zolafren, Olzapin, Oferta, Zypadhera	CN1CCN(CC1)C2=NC3=C(NC4=C2C=C(C)S4)C=CC=C3	2.69	1	1	1
S2494	Olopatadine HCl	e9	L8000-07	in 10mM DMSO	Histamine Receptor	Neuronal Signaling	Olopatadine HCl(ALO4943A,KW4679) is a histamine blocker and mast cell stabilizer with an IC50 of 559 μM for the release of histamine.	373.87	140462-76-6	75	200.6	13	34.77	http://selleckchem.com/products/Olopatadine-hydrochloride(Opatanol).html	C21H23NO3.HCl	Hydrochloride	ALO4943A,KW4679	Cl.CN(C)CC\C=C/1C2=C(COC3=C1C=C(CC(O)=O)C=C3)C=CC=C2	0.92	2	0	5
S2496	Ozagrel	f9	L8000-07	in 10mM DMSO	P450 (e.g. CYP17),Prostaglandin Receptor	GPCR & G Protein	Ozagrel (OKY-046) is a selective thromboxane A(2) (TXA(2)) synthetase inhibitor with IC50 of 11 nM for rabbit platelet, used for the improvement of postoperative cerebrovascular contraction and accompanying cerebral ischaemia.	228.25	82571-53-7	46	201.53	<1	N/A	http://selleckchem.com/products/Ozagrel.html	C13H12N2O2	free base	OKY-046	OC(=O)/C=C/C1=CC=C(C[N]2C=CN=C2)C=C1	1.604	2	0	4
S2497	Pancuronium dibromide	g9	L8000-07	in 10mM DMSO	AChR	Neuronal Signaling	Pancuronium dibromide(Pavulon) is a competitive nicotinic acetylcholine receptor antagonist, used as a muscle relaxant.	732.67	15500-66-0	100	136.49	100	136.49	http://selleckchem.com/products/Pancuronium-bromide(Pavulon).html	C35H60N2O4.2Br	di-quaternary-N bromide salt	Pavulon	[Br-].[Br-].CC(=O)OC1CC2CCC3C(CCC4(C)C3CC(C4OC(C)=O)[N+]5(C)CCCCC5)C2(C)CC1[N+]6(C)CCCCC6	-2.043	4	0	6
S2499	Phenoxybenzamine HCl	h9	L8000-07	in 10mM DMSO	Adrenergic Receptor	GPCR & G Protein	Phenoxybenzamine HCl (NSC 37448, NCI-c01661) is a non-specific, irreversible alpha antagonist with an IC50 of 550 nM.	340.3	63-92-3	68	199.82	17	49.96	http://selleckchem.com/products/Phenoxybenzamine-hydrochloride.html	C18H22ClNO.HCl	HCl	NSC 37448, NCI-c01661	Cl.CC(COC1=CC=CC=C1)N(CCCl)CC2=CC=CC=C2	4.96	1	0	8
S2502	Quinine HCl Dihydrate	a10	L8000-07	in 10mM DMSO	Potassium Channel	Transmembrane Transporters	Quinine HCl Dihydrate is a white crystalline K+ channel blocker, used to treat malaria.	396.91	6119-47-7	79	199.04	43	108.34	http://selleckchem.com/products/Quinine-hydrochloride-dihydrate.html	C20H24N2O2.HCl.2H2O	Hydrochloride dihydrate	N/A	O.O.Cl.COC1=CC2=C(C=C1)N=CC=C2C(O)C3CC4CCN3CC4C=C	2.701	2	1	4
S2503	Racecadotril	b10	L8000-07	in 10mM DMSO	Opioid Receptor	Neuronal Signaling	Racecadotril (Acetorphan) is a peripherally acting enkephalinase inhibitor with an IC50 of 4.5 μM.	385.48	81110-73-8	22	57.07	<1	N/A	http://selleckchem.com/products/Racecadotril(Acetorphan).html	C21H23NO4S	free base	Acetorphan	CC(=O)SCC(CC1=CC=CC=C1)C(=O)NCC(=O)OCC2=CC=CC=C2	3.128	4	1	11
S2504	Ribavirin (ICN-1229)	c10	L8000-07	in 10mM DMSO	Antiviral	Microbiology	Ribavirin (NSC-163039, ICN-1229, RTCA, Tribavirin), a synthetic guanosine analogue, possesses a broad spectrum of activity against DNA and RNA viruses.	244.21	36791-04-5	49	200.65	49	200.65	http://selleckchem.com/products/Ribavirin(Copegus).html	C8H12N4O5	free base	NSC-163039, RTCA, Tribavirin	NC(=O)C1=N[N](C=N1)C2OC(CO)C(O)C2O	-2.745	4	4	3
S2505	Rosiglitazone (BRL-49653) maleate	d10	L8000-07	in 10mM DMSO	Autophagy,Ferroptosis,PPAR,TRP Channel	Metabolism	Rosiglitazone maleate (BRL-49653C), a member of the thiazolidinedione class of antihyperglycaemic agents, is a high-affinity selective agonist of the peroxisome proliferator-activated receptor-γ (PPAR-γ) with IC50 of 42 nM. Rosiglitazone maleate also modulates TRP channels and induces autophagy. Rosiglitazone prevents ferroptosis.	473.5	155141-29-0	94	198.52	<1	N/A	http://selleckchem.com/products/Rosiglitazone-maleate.html	C18H19N3O3S.C4H4O4	Maleate	BRL-49653C	CN(CCOC1=CC=C(CC2SC(=O)NC2=O)C=C1)C3=NC=CC=C3.OC(=O)\C=C/C(O)=O	3.307	6	1	9
S2508	Scopolamine (LSM-4015) HBr	e10	L8000-07	in 10mM DMSO	AChR	Neuronal Signaling	Scopolamine HBr (LSM-4015,NSC 61806,(-)-Scopolamine hydrobromide, Hyoscine hydrobromide, Scopine hydrobromide) is a competitive muscarinic acetylcholine receptor antagonist with an IC50 of 55.3 nM.	384.26	114-49-8	76	197.78	76	197.78	http://selleckchem.com/products/Scopolamine-hydrobromide.html	C17H21NO4.HBr	Hydrobromide	LSM-4015,NSC 61806,(-)-Scopolamine hydrobromide, Hyoscine hydrobromide, Scopine hydrobromide	Br.CN1C2CC(CC1C3OC23)OC(=O)C(CO)C4=CC=CC=C4	1.314	3	1	5
S2509	Sotalol HCl	f10	L8000-07	in 10mM DMSO	Adrenergic Receptor	Neuronal Signaling	Sotalol(MJ-1999) is a non-selective beta blocker and a potassium channel blocker with an IC50 of 43 μM.	308.82	959-24-0	61	197.53	61	197.53	http://selleckchem.com/products/Sotalol-hydrochloride(Betapace).html	C12H20N2O3S.HCl	Hydrochloride	MJ-1999	Cl.CC(C)NCC(O)C1=CC=C(N[S](C)(=O)=O)C=C1	0.876	2	3	6
S2511	Sulfadoxine	g10	L8000-07	in 10mM DMSO	Anti-infection	Microbiology	Sulfadoxine (Sulphadoxine) is an ultra-long-lasting sulfonamide with an IC50 of 249 μg/ml for P. vivax.	310.33	2447-57-6	62	199.78	<1	N/A	http://selleckchem.com/products/Sulfadoxine(Sulphadoxine).html	C12H14N4O4S	free base	Sulphadoxine	COC1=C(OC)C(=NC=N1)N[S](=O)(=O)C2=CC=C(N)C=C2	0.837	6	2	5
S2512	Tenoxicam	h10	L8000-07	in 10mM DMSO	Immunology & Inflammation related	Immunology & Inflammation	Tenoxicam(Ro-12-0068) is a good HO. radicals scavenger with an IC50 of 56.7 μM.	337.38	59804-37-4	68	201.55	<1	N/A	http://selleckchem.com/products/Tenoxicam(Mobiflex).html	C13H11N3O4S2	free base	Ro-12-0068	CN1C(=C(O)C2=C(C=CS2)[S]1(=O)=O)C(=O)NC3=CC=CC=N3	0.454	4	2	2
S2515	Vardenafil HCl Trihydrate	a11	L8000-07	in 10mM DMSO	PDE	Metabolism	Vardenafil HCl Trihydrate (BAY38-9456) is a new type PDE inhibitor with IC50 of 0.7 and 180 nM for PDE5 and PDE1, respectively.	579.11	330808-88-3	100	172.68	10	17.27	http://selleckchem.com/products/Vardenafil(Vivanza).html	C23H32N6O4S.HCl.3H2O	Hydrochloride trihydrate	BAY38-9456	O.O.O.Cl.CCCC1=NC(=C2[N]1N=C(NC2=O)C3=CC(=CC=C3OCC)[S](=O)(=O)N4CCN(CC)CC4)C	2.109	6	1	8
S2516	Xylazine HCl	b11	L8000-07	in 10mM DMSO	Adrenergic Receptor	Neuronal Signaling	Xylazine(BAY 1470 hydrochloride) is an α2-Adrenergic receptor agonist, used as a sedative and muscle relaxant.	256.79	23076-35-9	50	194.71	12	46.73	http://selleckchem.com/products/Xylazine(Rompun).html	C12H16N2S.HCl	Hydrochloride	BAY 1470 hydrochloride	Cl.CC1=C(NC2=NCCCS2)C(=CC=C1)C	3.647	1	1	2
S2517	Maprotiline HCl	c11	L8000-07	in 10mM DMSO	Adrenergic Receptor	Neuronal Signaling	Maprotiline HCl is a selective noradrenalin re-uptake inhibitor, used in the treatment of depression.	313.86	10347-81-6	63	200.73	<1	N/A	http://selleckchem.com/products/Maprotiline-hydrochloride.html	C20H23N.HCl	Hydrochloride	N/A	Cl.CNCCCC12CCC(C3=CC=CC=C13)C4=C2C=CC=C4	4.498	0	1	4
S2519	Naphazoline HCl	d11	L8000-07	in 10mM DMSO	Adrenergic Receptor	Neuronal Signaling	Naphazoline HCl is an ocular vasoconstrictor and imidazoline derivative sympathomimetic amine.	246.74	550-99-2	17	68.9	49	198.59	http://selleckchem.com/products/Naphazoline-hydrochloride-Naphcon.html	C14H14N2.HCl	Hydrochloride	N/A	Cl.C1CN=C(CC2=C3C=CC=CC3=CC=C2)N1	2.442	1	1	2
S2528	Ciclopirox	e11	L8000-07	in 10mM DMSO	ATPase,Fungal	Transmembrane Transporters	Ciclopirox(HOE 296b, Penlac) is a broad-spectrum antifungal agent working as an iron chelator.	207.27	29342-05-0	42	202.63	<1	N/A	http://selleckchem.com/products/Ciclopirox-Penlac.html	C12H17NO2	Free Base	HOE 296b, Penlac	CC1=CC(=O)N(O)C(=C1)C2CCCCC2	2.489	1	0	1
S2529	Dopamine HCl	f11	L8000-07	in 10mM DMSO	Dopamine Receptor	Neuronal Signaling	Dopamine HCl(ASL279, NSC 173182) is a catecholamine neurotransmitter present in a wide variety of animals,And a dopamine D1-5 receptors agonist.	189.64	62-31-7	38	200.38	38	200.38	http://selleckchem.com/products/Dopamine-hydrochloride-Inotropin.html	C8H11NO2.HCl	Hydrochloride	ASL279, NSC 173182	Cl.NCCC1=CC(=C(O)C=C1)O	1.155	0	3	2
S2533	Ritodrine HCl	g11	L8000-07	in 10mM DMSO	Adrenergic Receptor	Neuronal Signaling	Ritodrine HCl (NSC 291565,DU 21220, Ritodrine) is a hydrochloride salt of ritodrine which is a β-2 adrenergic receptor agonist.	323.81	23239-51-2	65	200.73	65	200.73	http://selleckchem.com/products/Ritodrine-hydrochloride-Yutopar.html	C17H21NO3.HCl	Hydrochloride	NSC 291565,DU 21220, Ritodrine	Cl.CC(NCCC1=CC=C(O)C=C1)C(O)C2=CC=C(O)C=C2	3.037	0	4	6
S2535	Econazole nitrate	h11	L8000-07	in 10mM DMSO	Calcium Channel,Fungal	Transmembrane Transporters	Econazole Nitrate (NSC 243115,Spectazole) is a Ca2+ channel blocker, used as an antifungal medicine that fights infections caused by fungus.	444.7	24169-02-6	89	200.13	<1	N/A	http://selleckchem.com/products/Econazole-nitrate-Spectazole.html	C18H15Cl3N2O.HNO3	Nitrate	NSC 243115,Spectazole	O[N+]([O-])=O.ClC1=CC=C(COC(C[N]2C=CN=C2)C3=CC=C(Cl)C=C3Cl)C=C1	3.722	2	0	6
S2536	Miconazole	a2	L8000-08	in 10mM DMSO	Fungal	Microbiology	Miconazole (Monistat,R18134) is an imidazole antifungal agent.	416.13	22916-47-8	83	199.46	<1	N/A	http://selleckchem.com/products/Miconazole-Monistat.html	C18H14Cl4N2O	Free Base	Monistat,R18134	ClC1=CC=C(COC(C[N]2C=CN=C2)C3=C(Cl)C=C(Cl)C=C3)C(=C1)Cl	5.645	2	0	6
S2537	Secnidazole	b2	L8000-08	in 10mM DMSO	Anti-infection	Microbiology	Secnidazole (Flagentyl, PM 185184, RP 14539) is a nitroimidazole anti-infective.	185.18	3366-95-8	37	199.81	37	199.81	http://selleckchem.com/products/Secnidazole-Flagentyl.html	C7H11N3O3	free base	PM 185184, RP 14539	CC(O)C[N]1C(=NC=C1[N+]([O-])=O)C	0.04	1	1	3
S2541	Clomipramine HCl	c2	L8000-08	in 10mM DMSO	Serotonin Transporter	Neuronal Signaling	Clomipramine HCl(Anafranil) is a hydrochloride salt of clomipramine which is a serotonin transporter (SERT), norepinephrine transporter (NET) dopamine transporter (DAT) blocker with Ki of 0.14, 54 and 3 nM, respectively.	351.31	17321-77-6	70	199.25	70	199.25	http://selleckchem.com/products/Clomipramine-hydrochloride-Anafranil.html	C19H23ClN2.HCl	Hydrochloride	Anafranil	Cl.CN(C)CCCN1C2=C(CCC3=C1C=C(Cl)C=C3)C=CC=C2	5.434	0	0	4
S2543	Ceftiofur HCl	e2	L8000-08	in 10mM DMSO	Antibiotics,Bacterial	Microbiology	Ceftiofur HCl (U-67279A,Excenel hydrochloride) is a cephalosporin antibiotic, used to treat both Gram-positive and Gram-negative bacteria infection.	560.02	103980-44-5	100	178.57	<1	N/A	http://selleckchem.com/products/Ceftiofur-hydrochloride.html	C19H17N5O7S3.HCl	Hydrochloride	U-67279A,Excenel hydrochloride	Cl.CO/N=C(/C(=O)NC1C2SCC(=C(N2C1=O)C(O)=O)CSC(=O)C3=CC=CO3)C4=CSC(=N4)N	1.09	8	2	9
S2549	Trospium chloride	f2	L8000-08	in 10mM DMSO	AChR	Neuronal Signaling	Trospium chloride is a competitive muscarinic cholinergic receptor antagonist.	427.96	10405-02-4	41	95.8	86	200.95	http://selleckchem.com/products/Trospium-chloride-Sanctura.html	C25H30NO3.Cl	quaternary-N chloride salt	N/A	[Cl-].OC(C(=O)OC1CC2CCC(C1)[N+]23CCCC3)(C4=CC=CC=C4)C5=CC=CC=C5	-0.324	2	0	5
S2552	Azelastine HCl	h2	L8000-08	in 10mM DMSO	Histamine Receptor	Neuronal Signaling	Azelastine HCl is a potent, second-generation, selective, histamine receptor antagonist, used in the treatment of rhinitis.	418.36	79307-93-0	28	66.93	35	83.66	http://selleckchem.com/products/azelastine.html	C22H24ClN3O.HCl	Hydrochloride	N/A	Cl.CN1CCCC(CC1)N2N=C(CC3=CC=C(Cl)C=C3)C4=CC=CC=C4C2=O	4.476	2	0	3
S2553	5-Aminolevulinic acid HCl	a3	L8000-08	in 10mM DMSO	Others	Others	5-Aminolevulinic Acid HCl(5-ALA hydrochloride) is an intermediate in the porphyrin synthesis pathway, used as a photosensitizing agent and a antineoplastic agent.	167.59	5451-09-2	34	202.88	34	202.88	http://selleckchem.com/products/5-Aminolevulinic-acid-hydrochloride.html	C5H9NO3.HCl	Hydrochloride	5-ALA hydrochloride	Cl.NCC(=O)CCC(O)=O	-3.318	2	1	4
S2554	Daphnetin	b3	L8000-08	in 10mM DMSO	EGFR,PKA,PKC	Angiogenesis	Daphnetin, a natural coumarin derivative, is a protein kinase inhibitor, inhibits EGFR, PKA and PKC with IC50 of 7.67 μM, 9.33 μM and 25.01 μM, respectively, also known to exhibit anti-inflammatory and anti-oxidant activities.	178.14	486-35-1	35	196.47	<1	N/A	http://selleckchem.com/products/Daphnetin.html	C9H6O4	free base	N/A	OC1=CC=C2C=CC(=O)OC2=C1O	1.415	2	2	0
S2555	Clarithromycin	c3	L8000-08	in 10mM DMSO	P450 (e.g. CYP17)	Metabolism	Clarithromycin (A-56268) is a macrolide antibiotic and a CYP3A4 inhibitor, used to treat a number of bacterial infections.	747.95	81103-11-9	25	33.42	<1	N/A	http://selleckchem.com/products/clarithromycin.html	C38H69NO13	free base	A-56268	CCC1OC(=O)C(C)C(OC2CC(C)(OC)C(O)C(C)O2)C(C)C(OC3OC(C)CC(C3O)N(C)C)C(C)(CC(C)C(=O)C(C)C(O)C1(C)O)OC	2.2	9	3	8
S2556	Rosiglitazone (BRL 49653)	d3	L8000-08	in 10mM DMSO	Autophagy,Ferroptosis,PPAR,TRP Channel	Metabolism	Rosiglitazone (BRL 49653) is a potent antihyperglycemic agent and a potent thiazolidinedione insulin sensitizer with IC50 of 12, 4 and 9 nM for rat, 3T3-L1 and human adipocytes, respectively. Rosiglitazone is a pure ligand of PPAR-gamma, and has no PPAR-alpha-binding action. Rosiglitazone modulates TRP channels and induces autophagy. Rosiglitazone prevents ferroptosis.	357.43	122320-73-4	71	198.64	<1	N/A	http://selleckchem.com/products/Rosiglitazone-Avandia.html	C18H19N3O3S	Free Base	BRL 49653	CN(CCOC1=CC=C(CC2SC(=O)NC2=O)C=C1)C3=CC=CC=N3	3.268	4	1	7
S2559	Cortisone acetate	e3	L8000-08	in 10mM DMSO	Glucocorticoid Receptor	Endocrinology & Hormones	Cortisone acetate (Cortone, NSC 49420) is an acetate salt form of cortisone that is a steroid hormone and a glucocorticoid.	402.48	50-04-4	7	17.39	<1	N/A	http://selleckchem.com/products/Cortisone-acetate-Cortone.html	C23H30O6	free base	Cortone,NSC 49420	CC(=O)OCC(=O)C1(O)CCC2C3CCC4=CC(=O)CCC4(C)C3C(=O)CC12C	1.619	5	0	4
S2561	Clomifene citrate	f3	L8000-08	in 10mM DMSO	Estrogen/progestogen Receptor	Endocrinology & Hormones	Clomifene citrate (NSC 35770, Clomiphene citrate) is a selective estrogen receptor modulator, used in the treatment of ovulation induction.	598.08	50-41-9	120	200.64	<1	N/A	http://selleckchem.com/products/Clomifene-citrate-Serophene.html	C26H28ClNO.C6H8O7	Citrate	NSC 35770, Clomiphene citrate	CCN(CC)CCOC1=CC=C(C=C1)C(=C(Cl)/C2=CC=CC=C2)/C3=CC=CC=C3.OC(=O)CC(O)(CC(O)=O)C(O)=O	2.129	4	0	14
S2564	Cloxacillin Sodium	g3	L8000-08	in 10mM DMSO	Anti-infection	Microbiology	Cloxacillin Sodium(Cloxacap,BRL 1621 sodium salt) is a sodium salt of cloxacillin that is a penicillinase-resistant, acid resistant, semi-synthetic penicillin.	475.88	7081-44-9	55	115.58	55	115.58	http://selleckchem.com/products/Cloxacillin-sodium-Cloxacap.html	C19H19ClN3NaO6S	Sodium Salt & hydrate	Cloxacap,BRL 1621 sodium salt	O.[Na+].CC1=C(C(=O)NC2C3SC(C)(C)C(N3C2=O)C([O-])=O)C(=NO1)C4=CC=CC=C4Cl	0.619	4	1	4
S2566	Isoprenaline (NCI-C55630) HCl	h3	L8000-08	in 10mM DMSO	Adrenergic Receptor	Neuronal Signaling	Isoprenaline HCl (NCI-c55630,Isoproterenol hydrochloride) is a non-selective beta-adrenergic receptor agonist, used for the treatment of bradycardia and heart block.	247.72	51-30-9	50	201.84	50	201.84	http://selleckchem.com/products/Isoprenaline-hydrochloride.html	C11H17NO3.HCl	Hydrochloride	NCI-c55630,Isoproterenol hydrochloride	Cl.CC(C)NCC(O)C1=CC=C(O)C(=C1)O	1.481	0	4	4
S2567	Medroxyprogesterone acetate (NSC-26386)	a4	L8000-08	in 10mM DMSO	Estrogen/progestogen Receptor	Endocrinology & Hormones	Medroxyprogesterone acetate (MPA, NSC-26386, Medroxyprogesterone 17-acetate, Farlutin) is a synthetic progestin and act as a potent progesterone receptor agonist, used to treat abnormal menstruation or irregular vaginal bleeding.	386.52	71-58-9	12	31.05	<1	N/A	http://selleckchem.com/products/Medroxyprogesterone-acetate.html	C24H34O4	Free Base	MPA, NSC-26386, Medroxyprogesterone 17-acetate, Farlutin	CC1CC2C(CCC3(C)C2CCC3(OC(C)=O)C(C)=O)C4(C)CCC(=O)C=C14	3.755	4	0	3
S2569	Phenylephrine (NCI-C55641) HCl	b4	L8000-08	in 10mM DMSO	Adrenergic Receptor	GPCR & G Protein	Phenylephrine HCl (NCI-c55641,Phenylephrine hydrochloride,(R)-(-)-Phenylephrine hydrochloride, L-Phenylephrine hydrochloride) is a selective α1-adrenergic receptor agonist, used primarily as a decongestant.	203.67	61-76-7	41	201.31	41	201.31	http://selleckchem.com/products/Phenylephrine-hydrochloride.html	C9H13NO2.HCl	Hydrochloride	NCI-c55641,Phenylephrine hydrochloride,(R)-(-)-Phenylephrine hydrochloride, L-Phenylephrine hydrochloride	Cl.CNCC(O)C1=CC(=CC=C1)O	0.997	0	3	3
S2570	Prednisolone Acetate	c4	L8000-08	in 10mM DMSO	Glucocorticoid Receptor	Endocrinology & Hormones	Prednisolone Acetate (Omnipred,Prednisolone-21-acetate) is a synthetic corticosteroid drug that is particularly effective as an immunosuppressant agent.	402.48	52-21-1	81	201.25	<1	N/A	http://selleckchem.com/products/Prednisolone-acetate-Omnipred.html	C23H30O6	free base	Omnipred,Prednisolone-21-acetate	CC(=O)OCC(=O)C1(O)CCC2C3CCC4=CC(=O)C=CC4(C)C3C(O)CC12C	1.639	4	1	4
S2576	Xylometazoline HCl	d4	L8000-08	in 10mM DMSO	Adrenergic Receptor	GPCR & G Protein	Xylometazoline is an α-adrenoceptor agonist commonly used as nasal decongestant, exhibits highest potency at α2B-adrenoceptor subtype with EC50 of 99 μM.	280.84	1218-35-5	27	96.14	56	199.4	http://selleckchem.com/products/xylometazoline-hcl.html	C16H24N2.HCl	HCl	N/A	Cl.CC1=C(CC2=NCCN2)C(=CC(=C1)C(C)(C)C)C	3.906	1	1	3
S2577	Phenacetin	e4	L8000-08	in 10mM DMSO	COX	Neuronal Signaling	Phenacetin (Acetophenetidin) is a non-opioid analgesic without anti-inflammatory properties.	179.22	62-44-2	36	200.87	<1	N/A	http://selleckchem.com/products/phenacetin.html	C10H13NO2	free base	Acetophenetidin	CCOC1=CC=C(NC(C)=O)C=C1	1.282	2	1	3
S2579	Zidovudine	f4	L8000-08	in 10mM DMSO	CRISPR/Cas9,Reverse Transcriptase	Microbiology	Zidovudine (ZDV, Azidothymidine, NSC 602670,Retrovir) is a nucleoside analogue reverse transcriptase inhibitor, used to treat HIV. It could decrease the HDR efficiency and decrease CRISPR-mediated sequence-specific genome knockin events while increaseing knockout efficiency.	267.24	30516-87-1	53	198.32	53	198.32	http://selleckchem.com/products/zidovudine-retrovir.html	C10H13N5O4	free base	Azidothymidine, NSC 602670,Retrovir	CC1=CN(C2CC(N=[N+]=[N-])C(CO)O2)C(=O)NC1=O	0.064	4	2	3
S2581	Quinapril HCl	g4	L8000-08	in 10mM DMSO	RAAS	Endocrinology & Hormones	Quinapril HCl (CI-906, PD-109452-2) is the hydrochloride salt of quinapril that is an angiotensin-converting enzyme inhibitor with a Ki of 20 μM.	474.98	82586-55-8	18	37.9	95	200.01	http://selleckchem.com/products/quinapril-hydrochloride-accupril.html	C25H30N2O5.HCl	Hydrochloride	CI-906, PD-109452-2	Cl.CCOC(=O)C(CCC1=CC=CC=C1)NC(C)C(=O)N2CC3=C(CC2C(O)=O)C=CC=C3	1.038	4	1	10
S2584	Clobetasol propionate	h4	L8000-08	in 10mM DMSO	Glucocorticoid Receptor	Endocrinology & Hormones	Clobetasol propionate (CGP9555, CCl 4725) is an anti-inflammatory corticosteroid used to treat various skin disorders.	466.97	25122-46-7	93	199.16	<1	N/A	http://selleckchem.com/products/clobetasol-propionate.html	C25H32ClFO5	free base	CGP9555, CCl 4725	CCC(=O)OC1(C(C)CC2C3CCC4=CC(=O)C=CC4(C)C3(F)C(O)CC12C)C(=O)CCl	3.958	4	1	5
S2585	Brompheniramine hydrogen maleate	a5	L8000-08	in 10mM DMSO	Histamine Receptor	Neuronal Signaling	Brompheniramine hydrogen maleate(Brompheniramine maleate) is a histamine H1 receptors antagonist.	435.31	980-71-2	87	199.86	46	105.67	http://selleckchem.com/products/brompheniramine.html	C16H19BrN2.C4H4	Maleate	Brompheniramine maleate	CN(C)CCC(C1=CC=C(Br)C=C1)C2=CC=CC=N2.OC(=O)\C=C/C(O)=O	0.784	3	0	7
S2586	Dimethyl Fumarate	b5	L8000-08	in 10mM DMSO	Nrf2	Immunology & Inflammation	Dimethyl fumarate (DMF,Tecfidera,BG-12) is the methyl ester of fumaric acid, used to treat people with relapsing forms of multiple sclerosis. Dimethyl fumarate is a nuclear factor (erythroid-derived)-like 2 (Nrf2) pathway activator and induces upregulation of antioxidant gene expression.	144.13	624-49-7	29	201.21	<1	N/A	http://selleckchem.com/products/dimethyl-Fumarate.html	C6H8O4	free base	DMF,Tecfidera,BG-12	COC(=O)\C=C\C(=O)OC	0.49	4	0	4
S2590	Pioglitazone (AD-4833)	c5	L8000-08	in 10mM DMSO	PPAR	Metabolism	Pioglitazone (AD-4833, U 72107) is a selective peroxisome proliferator-activated receptor-gamma (PPARγ) agonist, used to treat diabetes; A weak activator for full-length hPPARα, but not full-length hPPARδ.	356.44	111025-46-8	10	28.06	<1	N/A	https://www.selleckchem.com/products/pioglitazone.html	C19H20N2O3S	Free Base	U 72107	CCC1=CC=C(CCOC2=CC=C(CC3SC(=O)NC3=O)C=C2)N=C1	3.907	4	1	7
S2593	Tolvaptan	d5	L8000-08	in 10mM DMSO	Vasopressin Receptor	GPCR & G Protein	Tolvaptan (OPC-41061) is an orally effective nonpeptide arginine vasopressin V2 receptor antagonist with IC50 of 3 nM, used to treat hyponatremia.	448.94	150683-30-0	89	198.24	<1	N/A	http://selleckchem.com/products/tolvaptan-opc-41061.html	C26H25ClN2O3	free base	OPC-41061	CC1=CC=CC=C1C(=O)NC2=CC(=C(C=C2)C(=O)N3CCCC(O)C4=C3C=CC(=C4)Cl)C	5.127	2	2	3
S2601	Gliclazide	e5	L8000-08	in 10mM DMSO	Potassium Channel	Transmembrane Transporters	Gliclazide(S1702, SE1702) is a whole-cell beta-cell ATP-sensitive potassium currents blocker with an IC50 of 184 nM.	323.41	21187-98-4	65	200.98	<1	N/A	http://selleckchem.com/products/gliclazide-diamicron.html	C15H21N3O3S	free base	S1702, SE1702	CC1=CC=C(C=C1)[S](=O)(=O)NC(=O)NN2CC3CCCC3C2	1.905	3	2	3
S2602	Acemetacin	f5	L8000-08	in 10mM DMSO	COX	Neuronal Signaling	Acemetacin (K-708,TVX 1322) is a non-steroidal anti-inflammatory drug and a glycolic acid ester of indometacin that is a cyclooxygenase inhibitor.	415.82	53164-05-9	83	199.61	<1	N/A	http://selleckchem.com/products/acemetacin-emflex.html	C21H18ClNO6	free base	K-708,TVX 1322	COC1=CC2=C(C=C1)[N](C(=C2CC(=O)OCC(O)=O)C)C(=O)C3=CC=C(Cl)C=C3	3.942	5	0	7
S2603	Tioxolone	g5	L8000-08	in 10mM DMSO	Carbonic Anhydrase	Metabolism	Tioxolone(Thioxolone) is a metalloenzyme carbonic anhydrase I inhibitor with a Ki of 91 nM.	168.17	4991-65-5	34	202.18	<1	N/A	http://selleckchem.com/products/tioxolone.html	C7H4O3S	free base	Thioxolone	OC1=CC=C2SC(=O)OC2=C1	2.303	2	1	0
S2606	Mifepristone (RU486)	a6	L8000-08	in 10mM DMSO	Apoptosis related,Autophagy,Bcl-2,Estrogen/progestogen Receptor,Glucocorticoid Receptor	Endocrinology & Hormones	Mifepristone (RU486, C-1073, RU 38486, Mifegyne) is a remarkably active antagonist of progesterone receptor and glucocorticoid receptor with IC50 of 0.2 nM and 2.6 nM, respectively. Mifepristone promotes cell autophagy and apoptosis, decreases Bcl-2 level and increases Beclin1 level, accompanied by weakened interaction between Bcl-2 and Beclin1.	429.59	84371-65-3	85	197.86	<1	N/A	http://selleckchem.com/products/Mifepristone(Mifeprex).html	C29H35NO2	free base	RU486, C-1073, RU 38486, RU-486, Mifegyne	CC#CC1(O)CCC2C3CCC4=CC(=O)CCC4=C3C(CC12C)C5=CC=C(C=C5)N(C)C	5.655	1	0	3
S2607	Buflomedil HCl	b6	L8000-08	in 10mM DMSO	Adrenergic Receptor	Neuronal Signaling	Buflomedil HCl(NSC 759291) is a vasodilator used to treat claudication or the symptoms of peripheral arterial disease; A nonselective alpha adrenergic receptor inhibitor.	343.85	35543-24-9	31	90.16	69	200.67	http://selleckchem.com/products/auflomedil-hcl.html	C17H25NO4.HCl	Hydrochloride	NSC 759291	Cl.COC1=CC(=C(C(=O)CCCN2CCCC2)C(=C1)OC)OC	2.939	4	0	8
S2610	Lonidamine (AF-1890)	c6	L8000-08	in 10mM DMSO	Carbohydrate Metabolism,Others	Metabolism	Lonidamine (AF 1890, Diclondazolic Acid, DICA) is an orally administered small molecule hexokinase inactivator.	321.16	50264-69-2	64	199.28	<1	N/A	http://selleckchem.com/products/lonidamine.html	C15H10Cl2N2O2	free base	Diclondazolic Acid, DICA	OC(=O)C1=N[N](CC2=C(Cl)C=C(Cl)C=C2)C3=CC=CC=C13	4.65	2	0	3
S2611	Ethisterone	d6	L8000-08	in 10mM DMSO	Estrogen/progestogen Receptor	Endocrinology & Hormones	Ethisterone(17α-Ethynyltestosterone) is a progestogen hormone being considered to treat prostate cancer.	312.45	434-03-7	4	12.8	<1	N/A	http://www.selleck.cn/products/ethisterone.html	C21H28O2	Free Base	17α-Ethynyltestosterone	CC12CCC(=O)C=C1CCC3C2CCC4(C)C3CCC4(O)C#C	4.521	1	0	0
S2615	Noradrenaline bitartrate monohydrate	e6	L8000-08	in 10mM DMSO	Adrenergic Receptor	GPCR & G Protein	Noradrenaline bitartrate monohydrate (Levophed) is a direct alpha-adrenergic receptors stimulator.	337.28	108341-18-0	64	189.75	64	189.75	http://selleckchem.com/products/noradrenaline-bitartrate-monohydrate-levophed.html	C8H11NO3.C4H6O6.H2O	bitartrate monohydrate	Levophed	O.NCC(O)C1=CC(=C(O)C=C1)O.OC(C(O)C(O)=O)C(O)=O	-4.409	2	6	5
S2625	Fostamatinib (R788)	f6	L8000-08	in 10mM DMSO	Syk	Angiogenesis	Fostamatinib (R788), a prodrug of the active metabolite R406, is a Syk inhibitor with IC50 of 41 nM, strongly inhibits Syk but not Lyn, 5-fold less potent to Flt3. Phase 3.	580.46	901119-35-5	116	199.84	<1	N/A	http://selleckchem.com/products/R7935788-Fostamatinib.html	C23H26FN6O9P	free base	N/A	COC1=C(OC)C(=CC(=C1)NC2=NC=C(F)C(=N2)NC3=CC=C4OC(C)(C)C(=O)N(CO[P](O)(O)=O)C4=N3)OC	3.458	9	2	10
S2664	Clinofibrate	h6	L8000-08	in 10mM DMSO	HMG-CoA Reductase	Metabolism	Clinofibrate inhibits hydroxymethylglutaryl coenzyme A reductase (HMGCR) with IC50 of 0.47 mM, is a lipid-lowering agent used for controlling high cholesterol and triacylglyceride levels in the blood.	468.58	30299-08-2	94	200.61	<1	N/A	http://selleckchem.com/products/clinofibrate.html	C28H36O6	free base	N/A	CCC(C)(OC1=CC=C(C=C1)C2(CCCCC2)C3=CC=C(OC(C)(CC)C(O)=O)C=C3)C(O)=O	6.829	4	0	10
S2665	Ciprofibrate	a7	L8000-08	in 10mM DMSO	PPAR	DNA Damage/DNA Repair	Ciprofibrate (Win-35833) is a peroxisome proliferator-activated receptor agonist.	289.15	52214-84-3	58	200.59	<1	N/A	http://selleckchem.com/products/ciprofibrate.html	C13H14Cl2O3	free base	Win-35833	CC(C)(OC1=CC=C(C=C1)C2CC2(Cl)Cl)C(O)=O	2.954	2	0	4
S2673	Trametinib (GSK1120212)	b7	L8000-08	in 10mM DMSO	Apoptosis related,Autophagy,MEK	MAPK	Trametinib (GSK1120212, JTP-74057, Mekinist) is a highly specific and potent MEK1/2 inhibitor with IC50 of 0.92 nM/1.8 nM in cell-free assays, no inhibition of the kinase activities of c-Raf, B-Raf, ERK1/2. Trametinib activates autophagy and induces apoptosis.	615.39	871700-17-3	22	35.75	<1	N/A	http://selleckchem.com/products/gsk1120212-jtp-74057.html	C26H23FIN5O4	free base	JTP-74057, Mekinist	CN1C(=O)C(=C2N(C(=O)N(C3CC3)C(=O)C2=C1NC4=CC=C(I)C=C4F)C5=CC(=CC=C5)NC(C)=O)C	3.176	4	2	5
S2680	Ibrutinib (PCI-32765)	c7	L8000-08	in 10mM DMSO	BTK,Target Protein Ligand	Angiogenesis	Ibrutinib (PCI-32765,Imbruvica) is a potent and highly selective Brutons tyrosine kinase (Btk) inhibitor with IC50 of 0.5 nM in cell-free assays, modestly potent to Bmx, CSK, FGR, BRK, HCK, less potent to EGFR, Yes, ErbB2, JAK3, etc. Ibrutinib is applicable as a Btk ligand in the synthesis of a series of PROTACs including P13I.	440.5	936563-96-1	88	199.77	<1	N/A	http://selleckchem.com/products/pci-32765.html	C25H24N6O2	free base	PCI-32765,Imbruvica	NC1=C2C(=NC=N1)[N](N=C2C3=CC=C(OC4=CC=CC=C4)C=C3)C5CCCN(C5)C(=O)C=C	3.985	5	1	5
S2727	Dacomitinib (PF-00299804)	d7	L8000-08	in 10mM DMSO	Apoptosis related,EGFR,HER2	Protein Tyrosine Kinase	Dacomitinib (PF299804, PF299) is a potent, irreversible pan-ErbB inhibitor, mostly to EGFR with IC50 of 6 nM in a cell-free assay. Dacomitinib inhibits ERBB2 and ERBB4 with IC50 of 45.7 nM and 73.7 nM, respectively. Dacomitinib is effective against NSCLCs with EGFR or ERBB2 mutations (resistant to gefitinib) as well as those harboring the EGFR T790M mutation. Dacomitinib inhibits cell growth and …	469.94	1110813-31-4	19	40.43	<1	N/A	http://selleckchem.com/products/pf299804.html	C24H25ClFN5O2	free base	PF299804,PF299	COC1=C(NC(=O)/C=C/CN2CCCCC2)C=C3C(=NC=NC3=C1)NC4=CC(=C(F)C=C4)Cl	5.055	4	2	7
S2736	Fedratinib (TG101348)	e7	L8000-08	in 10mM DMSO	Apoptosis related,c-RET,FLT3,JAK	JAK/STAT	Fedratinib (SAR302503, TG101348) is a selective inhibitor of JAK2 with IC50 of 3 nM in cell-free assays, 35- and 334-fold more selective for JAK2 versus JAK1 and JAK3. Fedratinib also inhibits FMS-like tyrosine kinase 3 (FLT3) and RET (c-RET) with IC50 of 15 nM and 48 nM, respectively. Fedratinib has potential antineoplastic activity. Fedratinib inhibits proliferation and induces apoptosis. Phase…	524.68	936091-26-8	100	190.59	<1	N/A	http://selleckchem.com/products/Fedratinib-SAR302503-TG101348.html	C27H36N6O3S	free base	SAR302503	CC1=C(NC2=CC=CC(=C2)[S](=O)(=O)NC(C)(C)C)N=C(NC3=CC=C(OCCN4CCCC4)C=C3)N=C1	5.123	5	3	11
S2741	Niraparib (MK-4827)	f7	L8000-08	in 10mM DMSO	Apoptosis related,PARP	DNA Damage/DNA Repair	Niraparib (MK-4827) is a selective inhibitor of PARP1/2 with IC50 of 3.8 nM/2.1 nM, with great activity in cancer cells with mutant BRCA-1 and BRCA-2. It is >330-fold selective against PARP3, V-PARP and Tank1. Niraparib can form PARP–DNA complexes resulting in DNA damage, apoptosis, and cell death. Phase 3.	320.39	1038915-60-4	64	199.76	<1	N/A	http://selleckchem.com/products/mk-4827.html	C19H20N4O	Free Base	N/A	NC(=O)C1=CC=CC2=C[N](N=C12)C3=CC=C(C=C3)C4CCCNC4	2.618	2	2	3
S2760	Canagliflozin (JNJ 28431754)	g7	L8000-08	in 10mM DMSO	SGLT	GPCR & G Protein	Canagliflozin (TA 7284, JNJ 28431754) is a highly potent and selective SGLT2 inhibitor for hSGLT2 with IC50 of 2.2 nM in a cell-free assay, exhibits 413-fold selectivity over hSGLT1.	444.52	842133-18-0	88	197.97	<1	N/A	http://selleckchem.com/products/canagliflozin.html	C24H25FO5S	free base	TA 7284	CC1=C(CC2=CC=C(S2)C3=CC=C(F)C=C3)C=C(C=C1)C4OC(CO)C(O)C(O)C4O	3.446	1	4	5
S2762	Alectinib (CH5424802)	h7	L8000-08	in 10mM DMSO	ALK	Protein Tyrosine Kinase	Alectinib (CH5424802, AF-802, RG-7853) is a potent ALK inhibitor with IC50 of 1.9 nM in cell-free assays, sensitive to L1196M mutation and higher selectivity for ALK than PF-02341066, NVP-TAE684 and PHA-E429.	482.62	1256580-46-7	6	12.43	1	2.07	http://www.selleckchem.com/products/ch5424802.html	C30H34N4O2	Free Base	AF-802, RG-7853,CH5424802	CCC1=CC2=C(C=C1N3CCC(CC3)N4CCOCC4)C(C)(C)C5=C(C2=O)C6=CC=C(C=C6[NH]5)C#N	5.203	2	1	3
S2789	Tofacitinib (CP-690550)	a8	L8000-08	in 10mM DMSO	Apoptosis related,JAK	JAK/STAT	Tofacitinib (CP-690550,Tasocitinib) is a novel inhibitor of JAK3 with IC50 of 1 nM in cell-free assays, 20- to 100-fold less potent against JAK2 and JAK1. Tofacitinib inhibits the expression of antiapoptotic BCL-A1 and BCL-XL in human plasmacytoid dendritic cells (PDC) and induced PDC apoptosis.	312.37	477600-75-2	62	198.48	<1	N/A	http://selleckchem.com/products/tofacitinib-cp-690550.html	C16H20N6O	free base	Tasocitinib	CC1CCN(CC1N(C)C2=C3C=C[NH]C3=NC=N2)C(=O)CC#N	1.512	3	1	3
S2790	Istradefylline	b8	L8000-08	in 10mM DMSO	Adenosine Receptor	GPCR & G Protein	Istradefylline (KW-6002) is a selective adenosine A2A receptor (A2AR) antagonist with Ki of 2.2 nM. Phase 3.	384.43	155270-99-8	6	15.61	<1	N/A	http://selleckchem.com/products/istradefylline-kw-6002.html	C20H24N4O4	free base	KW-6002	CCN1C(=O)N(CC)C2=C([N](C)C(=N2)\C=C\C3=CC=C(OC)C(=C3)OC)C1=O	2.957	5	0	6
S2792	Torcetrapib	c8	L8000-08	in 10mM DMSO	CETP	Metabolism	Torcetrapib (CP-529414) is a CETP inhibitor with IC50 of 37 nM, elevates HDL-C and reduces nonHDL-C in plasma. Phase 3.	600.47	262352-17-0	120	199.84	<1	N/A	http://selleckchem.com/products/torcetrapib-cp-529414.html	C26H25F9N2O4	free base	CP-529414	CCOC(=O)N1C(CC)CC(N(CC2=CC(=CC(=C2)C(F)(F)F)C(F)(F)F)C(=O)OC)C3=C1C=CC(=C3)C(F)(F)F	7.345	4	0	10
S2797	Lonafarnib (SCH66336)	d8	L8000-08	in 10mM DMSO	Ras,Transferase	Metabolism	Lonafarnib (SCH66336) is an orally bioavailable FPTase inhibitor for H-ras, K-ras-4B and N-ras with IC50 of 1.9 nM, 5.2 nM and 2.8 nM in cell-free assays, respectively. Phase 3.	638.82	193275-84-2	127	198.8	<1	N/A	http://selleckchem.com/products/lonafarnib-sch66336.html	C27H31Br2ClN4O2	free base	SCH66336	NC(=O)N1CCC(CC1)CC(=O)N2CCC(CC2)C3C4=C(CCC5=C3C(=CC(=C5)Cl)Br)C=C(Br)C=N4	5.271	3	1	3
S2807	Dabrafenib (GSK2118436)	e8	L8000-08	in 10mM DMSO	Raf	MAPK	Dabrafenib (GSK2118436, GSK2118436A) is a mutant BRAFV600E specific inhibitor with IC50 of 0.7 nM in cell-free assays, with 7- and 9-fold less potency against B-Raf(wt) and c-Raf, respectively.	519.56	1195765-45-7	30	57.74	<1	N/A	http://selleckchem.com/products/dabrafenib-gsk2118436.html	C23H20F3N5O2S2	free base	GSK2118436A	CC(C)(C)C1=NC(=C(S1)C2=NC(=NC=C2)N)C3=C(F)C(=CC=C3)N[S](=O)(=O)C4=C(F)C=CC=C4F	5.377	5	2	6
S2809	MPEP	f8	L8000-08	in 10mM DMSO	GluR	Neuronal Signaling	MPEP is a selective mGlu5 receptor antagonist with IC50 of 36 nM, exhibits no appreciable activity at mGlu1b/2/3/4a/7b/8a/6 receptors.	193.24	96206-92-7	39	201.82	<1	N/A	http://selleckchem.com/products/mpep.html	C14H11N	free base	N/A	CC1=NC(=CC=C1)C#CC2=CC=CC=C2	3.499	1	0	2
S2814	Alpelisib (BYL719)	g8	L8000-08	in 10mM DMSO	PI3K	PI3K/Akt/mTOR	Alpelisib (BYL719) is a potent and selective PI3Kα inhibitor with IC50 of 5 nM in a cell-free assay, and minimal effect on PI3Kβ/γ/δ. Phase 2.	441.47	1217486-61-7	88	199.33	<1	N/A	http://selleckchem.com/products/byl719.html	C19H22F3N5O2S	free base	N/A	CC1=C(SC(=N1)NC(=O)N2CCCC2C(N)=O)C3=CC(=NC=C3)C(C)(C)C(F)(F)F	2.826	4	2	5
S2840	Apalutamide (ARN-509)	a9	L8000-08	in 10mM DMSO	Androgen Receptor	Endocrinology & Hormones	Apalutamide (ARN-509) is a selective and competitive androgen receptor inhibitor with IC50 of 16 nM in a cell-free assay, useful for prostate cancer treatment. Phase 3.	477.43	956104-40-8	18	37.7	<1	N/A	http://selleckchem.com/products/arn-509.html	C21H15F4N5O2S	free base	N/A	CNC(=O)C1=CC=C(C=C1F)N2C(=S)N(C(=O)C23CCC3)C4=CN=C(C#N)C(=C4)C(F)(F)F	4.452	3	1	4
S2851	Baricitinib (INCB028050)	b9	L8000-08	in 10mM DMSO	COVID-19,JAK	JAK/STAT	Baricitinib (LY3009104, INCB028050) is a selective JAK1 and JAK2 inhibitor with IC50 of 5.9 nM and 5.7 nM in cell-free assays, ~70 and ~10-fold selective versus JAK3 and Tyk2, no inhibition to c-Met and Chk2. Baricitinib is found to reduce or interrupt the passage of the virus into target cells and is used in the treatment research for COVID-19. Phase 3.	371.42	1187594-09-7	74	199.24	<1	N/A	http://selleckchem.com/products/baricitinib-ly3009104.html	C16H17N7O2S	free base	LY3009104	CC[S](=O)(=O)N1CC(CC#N)(C1)[N]2C=C(C=N2)C3=NC=NC4=C3C=C[NH]4	0.36	5	1	5
S2853	Carfilzomib (PR-171)	c9	L8000-08	in 10mM DMSO	Apoptosis related,Autophagy,COVID-19,Proteasome	Proteases	Carfilzomib (PR-171) is an irreversible proteasome inhibitor with IC50 of <5 nM in ANBL-6 cells, displayed preferential in vitro inhibitory potency against the ChT-L activity in the β5 subunit, but little or no effect on the PGPH and T-L activities. Carfilzomib activates prosurvival autophagy and induces cell apoptosis.	719.91	868540-17-4	50	69.45	<1	N/A	http://selleckchem.com/products/carfilzomib-pr-171.html	C40H57N5O7	free base	N/A	CC(C)CC(NC(=O)C(CCC1=CC=CC=C1)NC(=O)CN2CCOCC2)C(=O)NC(CC3=CC=CC=C3)C(=O)NC(CC(C)C)C(=O)C4(C)CO4	3.799	7	4	20
S2868	Alogliptin (SYR-322) benzoate	d9	L8000-08	in 10mM DMSO	DPP	Proteases	Alogliptin (SYR-322) benzoate is a potent, selective inhibitor of DPP-4 with IC50 of <10 nM, exhibits greater than 10,000-fold selectivity over DPP-8 and DPP-9.	461.51	850649-62-6	68	147.34	2	4.33	http://selleckchem.com/products/alogliptin-syr-322.html	C18H21N5O2.C7H6O2	benzoate	SYR-322	CN1C(=O)C=C(N2CCCC(N)C2)N(CC3=CC=CC=C3C#N)C1=O	1.271	2	1	3
S2874	Camostat Mesilate	e9	L8000-08	in 10mM DMSO	COVID-19,Sodium Channel	Transmembrane Transporters	Camostat (FOY-305, FOY-S980) is a trypsin-like protease inhibitor, inhibits airway epithelial sodium channel (ENaC) function with IC50 of 50 nM, less potent to trpsin, prostasin and matriptase.	494.52	59721-29-8	99	200.19	10	20.22	http://selleckchem.com/products/camostat-mesilate-foy-305.html	C20H22N4O5.CH4O3S	Mesilate	FOY-305, FOY-S980	CN(C)C(=O)COC(=O)CC1=CC=C(OC(=O)C2=CC=C(NC(N)=N)C=C2)C=C1.C[S](O)(=O)=O	0.969	5	2	10
S2875	Prucalopride	f9	L8000-08	in 10mM DMSO	5-HT Receptor	Neuronal Signaling	Prucalopride (R-93877) is a selective, high affinity 5-HT receptor agonist for 5-HT4A and 5-HT4B receptor with Ki of 2.5 nM and 8 nM, respectively, exhibits >290-fold selectivity against other 5-HT receptor subtypes.	367.87	179474-81-8	60	163.1	<1	N/A	http://selleckchem.com/products/prucalopride.html	C18H26ClN3O3	Free Base	R-93877	COCCCN1CCC(CC1)NC(=O)C2=CC(=C(N)C3=C2OCC3)Cl	1.056	3	2	6
S2883	4-Aminohippuric Acid	g9	L8000-08	in 10mM DMSO	Others	Others	4-Aminohippuric acid is a typical substrate of organic anion transport systems.	194.19	61-78-9	39	200.83	3	15.45	http://selleckchem.com/products/4-aminohippuric-acid.html	C9H10N2O3	free base	N/A	NC1=CC=C(C=C1)C(=O)NCC(O)=O	-0.227	2	2	3
S2884	Acesulfame Potassium	h9	L8000-08	in 10mM DMSO	Others	Others	Acesulfame potassium is a non-nutritive sweetener.	202.25	55589-62-3	40	197.78	40	197.78	http://selleckchem.com/products/acesulfame-potassium.html	C4H5NO4S.K	Potassium Salt	N/A	[KH].CC1=CC(=O)N[S](=O)(=O)O1	-0.858	2	1	0
S2900	Cobicistat (GS-9350)	a10	L8000-08	in 10mM DMSO	P450 (e.g. CYP17)	Metabolism	Cobicistat (GS-9350) is a potent and selective inhibitor of CYP3A with IC50 of 30-285 nM.	776.02	1004316-88-4	100	128.86	<1	N/A	http://selleckchem.com/products/cobicistat-gs-9350.html	C40H53N7O5S2	free base	N/A	CC(C)C1=NC(=CS1)CN(C)C(=O)NC(CCN2CCOCC2)C(=O)NC(CCC(CC3=CC=CC=C3)NC(=O)OCC4=CN=CS4)CC5=CC=CC=C5	4.765	7	3	20
S2902	S-Ruxolitinib (INCB018424)	b10	L8000-08	in 10mM DMSO	JAK	JAK/STAT	S-Ruxolitinib is the chirality of INCB018424, which is the first potent, selective, JAK1/2 inhibitor to enter the clinic with IC50 of 3.3 nM/2.8 nM, >130-fold selectivity for JAK1/2 versus JAK3. Phase 3.	306.37	941685-37-6	61	199.11	5	16.32	http://selleckchem.com/products/s-ruxolitinib.html	C17H18N6	free base	N/A	N#CCC(C1CCCC1)[N]2C=C(C=N2)C3=NC=NC4=C3C=C[NH]4	2.88	3	1	4
S2907	Pirfenidone (S-7701)	c10	L8000-08	in 10mM DMSO	CCR,TGF-beta/Smad	TGF-beta/Smad	Pirfenidone (S-7701, AMR-69) is an inhibitor for TGF-β production and TGF-β stimulated collagen production, reduces production of TNF-α and IL-1β, and also has anti-fibrotic and anti-inflammatory properties. Pirfenidone attenuates chemokine (CC motif) ligand-2 (CCL2) and CCL12 production with anti-fibrotic activity. Phase 3.	185.22	53179-13-8	37	199.76	<1	N/A	http://selleckchem.com/products/pirfenidone.html	C12H11NO	free base	AMR-69	CC1=CN(C(=O)C=C1)C2=CC=CC=C2	1.905	1	0	1
S2922	Icotinib (BPI-2009H)	d10	L8000-08	in 10mM DMSO	EGFR	Protein Tyrosine Kinase	Icotinib (BPI-2009H) is a potent and specific EGFR inhibitor with IC50 of 5 nM, including the EGFR, EGFR(L858R), EGFR(L861Q), EGFR(T790M) and EGFR(T790M, L858R).	391.42	610798-31-7	78	199.27	<1	N/A	http://selleckchem.com/products/icotinib.html	C22H21N3O4	free base	BPI-2009H	C#CC1=CC(=CC=C1)NC2=NC=NC3=C2C=C4OCCOCCOCCOC4=C3	4.128	6	1	2
S3001	Clevudine	e10	L8000-08	in 10mM DMSO	DNA/RNA Synthesis	DNA Damage/DNA Repair	Clevudine(Levovir,L-FMAU) is an antiviral drug for the treatment of hepatitis B.	260.22	163252-36-6	52	199.83	52	199.83	http://selleckchem.com/products/clevudine-levovir.html	C10H13FN2O5	free base	Levovir,L-FMAU	CC1=CN(C2OC(CO)C(O)C2F)C(=O)NC1=O	-1.065	3	3	2
S3002	Rivaroxaban (BAY 59-7939)	f10	L8000-08	in 10mM DMSO	Factor Xa	Metabolism	Rivaroxaban (BAY 59-7939) is a direct inhibitor of Factor Xa with Ki and IC50 of 0.4 nM and 0.7 nM in cell-free assays, respectively. It is selective for human factor Xa, for which it has >10 000-fold greater selectivity than for other biologically relevant serine proteases (IC50 >20 μM).	435.88	366789-02-8	87	199.6	<1	N/A	http://selleckchem.com/products/Rivaroxaban.html	C19H18ClN3O5S	free base	BAY 59-7939	ClC1=CC=C(S1)C(=O)NCC2CN(C(=O)O2)C3=CC=C(C=C3)N4CCOCC4=O	1.797	5	1	5
S3005	Paroxetine HCl	g10	L8000-08	in 10mM DMSO	Serotonin Transporter	Neuronal Signaling	Paroxetine HCl (BRL-29060A, FG-7051) is an antidepressant drug of the SSRI type.	365.83	78246-49-8	73	199.55	1	2.73	http://selleckchem.com/products/paroxetine-hcl.html	C19H20FNO3.HCl	Hydrochloride	BRL-29060A, FG-7051	Cl.FC1=CC=C(C=C1)C2CCNCC2COC3=CC4=C(OCO4)C=C3	3.611	3	1	4
S3008	Zaltoprofen	h10	L8000-08	in 10mM DMSO	COX	Neuronal Signaling	Zaltoprofen(CN100,Soleton) is an inhibitor of COX-1 and COX-2 for treatment of arthritis.	298.36	74711-43-6	60	201.1	<1	N/A	http://selleckchem.com/products/zaltoprofen.html	C17H14O3S	free base	CN100,Soleton	CC(C(O)=O)C1=CC2=C(SC3=CC=CC=C3C(=O)C2)C=C1	3.684	2	0	2
S3012	Pazopanib	a11	L8000-08	in 10mM DMSO	Autophagy,Cathepsin B,c-Kit,CSF-1R,Cysteine Protease,FGFR,PDGFR,VEGFR	Protein Tyrosine Kinase	Pazopanib (GW786034) is a novel multi-target inhibitor of VEGFR1, VEGFR2, VEGFR3, PDGFR, FGFR, c-Kit and c-Fms/CSF1R with IC50 of 10 nM, 30 nM, 47 nM, 84 nM, 74 nM, 140 nM and 146 nM in cell-free assays, respectively. Pazopanib induces cathepsin B activation and autophagy.	437.52	444731-52-6	87	198.85	<1	N/A	http://selleckchem.com/products/pazopanib.html	C21H23N7O2S	Free Base	GW786034	C[N]1N=C2C=C(C=CC2=C1C)N(C)C3=NC(=NC=C3)NC4=CC=C(C)C(=C4)[S](N)(=O)=O	3.741	5	2	5
S3015	Amoxicillin	b11	L8000-08	in 10mM DMSO	Antibiotics,Bacterial	Microbiology	Amoxicillin (Amoxycillin) is a moderate-spectrum, bacteriolytic, β-lactam antibiotic used to treat bacterial infections caused by susceptible microorganisms.	365.4	26787-78-0	73	199.78	<1	N/A	http://selleckchem.com/products/amoxicillin-amoxycillin.html	C16H19N3O5S	Free Base	Amoxycillin	CC1(C)SC2C(NC(=O)C(N)C3=CC=C(O)C=C3)C(=O)N2C1C(O)=O	-2.539	3	3	4
S3017	Aspirin (NSC 27223)	c11	L8000-08	in 10mM DMSO	Autophagy,COX,Mitophagy	Metabolism	Aspirin (NSC 27223, Acetylsalicylic acid, ASA) is a salicylate, and irreversible COX1 and COX2 inhibitor, used as an analgesic to relieve minor aches and pains, as an antipyretic to reduce fever, and as an anti-inflammatory medication. Aspirin induces autophagy and stimulates mitophagy.	180.16	50-78-2	36	199.82	<1	N/A	http://selleckchem.com/products/aspirin-acetylsalicylic-acid.html	C9H8O4	free base	Acetylsalicylic acid, ASA	CC(=O)OC1=C(C=CC=C1)C(O)=O	1.227	3	0	3
S3018	Niflumic acid	d11	L8000-08	in 10mM DMSO	COX,GABA Receptor	Neuronal Signaling	Niflumic acid(Nifluril) is an inhibitor of cyclooxygenase-2 used for joint and muscular pain.	282.22	4394-00-7	56	198.43	<1	N/A	http://selleckchem.com/products/niflumic-acid.html	C13H9F3N2O2	free base	Nifluril	OC(=O)C1=CC=CN=C1NC2=CC=CC(=C2)C(F)(F)F	3.34	2	1	4
S3019	Ciclopirox ethanolamine	e11	L8000-08	in 10mM DMSO	ATPase,Fungal	Transmembrane Transporters	Ciclopirox ethanolamine (Ciclopirox olamine, HOE 296,Ciclopiroxolamine) is a broad-spectrum antifungal agent working as an iron chelator.	268.35	41621-49-2	6	22.36	<1	N/A	http://selleckchem.com/products/ciclopirox-ethanolamine.html	C12H17NO2.C2H7NO	Ethanolamine	Ciclopirox olamine, HOE 296,Ciclopiroxolamine	CC1=CC(=O)N(O)C(=C1)C2CCCCC2.NCCO	1.302	1	2	2
S3021	Rimonabant (SR141716)	f11	L8000-08	in 10mM DMSO	Acyltransferase,Bacterial,Cannabinoid Receptor,MmpL3,Transferase	GPCR & G Protein	Rimonabant (SR141716) is a selective antagonist of CB1 with IC50 of 13.6 nM and EC50 of 17.3 nM in hCB1 transfected HEK 293 membrane. Rimonabant is also a dual inhibitor of acyl CoA:cholesterol acyltransferases(ACAT) 1 and 2 and inhibits mycobacterial MmpL3.	463.79	168273-06-1	25	53.9	<1	N/A	http://selleckchem.com/products/rimonabant-sr141716.html	C22H21Cl3N4O	free base	SR141716	CC1=C([N](N=C1C(=O)NN2CCCCC2)C3=CC=C(Cl)C=C3Cl)C4=CC=C(Cl)C=C4	6.613	2	1	4
S3022	Cabazitaxel (XRP6258)	g11	L8000-08	in 10mM DMSO	Autophagy,Microtubule Associated	Cytoskeletal Signaling	Cabazitaxel (RPR-116258A, XRP6258, TXD 258, Taxoid XRP6258) is a semi-synthetic derivative of a natural taxoid that kills cancer cells by inhibiting cell division and growth. Cabazitaxel exerts its effects by inhibiting microtubule growth and assembly, processes that are essential for cells to divide. Cabazitaxel induces autophagy via the PI3K/Akt/mTOR pathway.	835.93	183133-96-2	100	119.63	<1	N/A	http://selleckchem.com/products/cabazitaxel-jevtana.html	C45H57NO14	free base	RPR-116258A, TXD 258, Taxoid XRP6258	COC1CC2OCC2(OC(C)=O)C3C(OC(=O)C4=CC=CC=C4)C5(O)CC(OC(=O)C(O)C(NC(=O)OC(C)(C)C)C6=CC=CC=C6)C(=C(C(OC)C(=O)C13C)C5(C)C)C	3.403	12	2	15
S3023	Bufexamac	h11	L8000-08	in 10mM DMSO	COX,IFN	Neuronal Signaling	Bufexamac(Bufexamic acid) is a COX inhibitor for IFN-α release with EC50 of 8.9 μM.	223.27	2438-72-4	45	201.55	<1	N/A	http://selleckchem.com/products/bufexamac.html	C12H17NO3	free base	Bufexamic acid	CCCCOC1=CC=C(CC(=O)NO)C=C1	2.191	2	1	6
S3024	Lamotrigine	a2	L8000-09	in 10mM DMSO	5-HT Receptor,Sodium Channel	Transmembrane Transporters	Lamotrigine (BW-430C,LTG) is a novel anticonvulsant drug for inhibition of 5-HT with IC50 of 240 μM and 474 μM in human platelets and rat brain synaptosomes, and also is a sodium channel blocker.	256.09	84057-84-1	10	39.05	<1	N/A	http://selleckchem.com/products/lamotrigine.html	C9H7Cl2N5	free base	BW-430C,LTG	NC1=NC(=C(N=N1)C2=CC=CC(=C2Cl)Cl)N	2.426	3	2	1
S3027	Fenoprofen calcium hydrate	b2	L8000-09	in 10mM DMSO	Immunology & Inflammation related	Immunology & Inflammation	Fenoprofen calcium hydrate(Fenoprofen calcium salt dihydrate,Feprona dihydrate,Progesic dihydrate) is a non-steroidal anti-inflammatory drug (NSAID).	558.63	71720-56-4, 53746-45-5	48	85.92	<1	N/A	http://selleckchem.com/products/fenoprofen-calcium-hydrate.html	C30H30CaO8	Calcium dihydrate salt	Fenoprofen calcium salt dihydrate,Feprona dihydrate,Progesic dihydrate	O.O.CC(C(=O)O[Ca]OC(=O)C(C)C1=CC=CC(=C1)OC2=CC=CC=C2)C3=CC=CC(=C3)OC4=CC=CC=C4	6.802	6	0	12
S3030	Niclosamide (BAY2353)	c2	L8000-09	in 10mM DMSO	Autophagy,STAT	JAK/STAT	Niclosamide (BAY2353, Niclocide, NSC 178296) can inhibit DNA replication and inhibit STAT3 with IC50 of 0.7 μM in a cell-free assay. Niclosamide selectively inhibited the phosphorylation of STAT3 and had no obvious inhibition against the activation of other homologues (e.g., STAT1 and STAT5).	327.12	50-65-7	8	24.46	<1	N/A	http://www.selleck.cn/products/niclosamide-niclocide.html	C13H8Cl2N2O4	Free Base	Niclocide, NSC 178296	OC1=CC=C(Cl)C=C1C(=O)NC2=C(Cl)C=C(C=C2)[N+]([O-])=O	3.595	1	2	3
S3035	Daunorubicin (RP 13057) HCl	d2	L8000-09	in 10mM DMSO	ADC Cytotoxin,Antineoplastic and Immunosuppressive Antibiotics,Apoptosis related,COVID-19,DNA/RNA Synthesis,Topoisomerase	DNA Damage/DNA Repair	Daunorubicin HCl (Daunomycin, RP 13057, Rubidomycin) inhibits both DNA and RNA synthesis and inhibits DNA synthesis with Ki of 0.02 μM in a cell-free assay. Daunorubicin is a topoisomerase II inhibitor that induces apoptosis.	563.98	23541-50-6	100	177.31	100	177.31	http://selleckchem.com/products/daunorubicin-hcl-daunomycin-hcl.html	C27H29NO10.HCl	Hydrochloride	Daunomycin HCl, Rubidomycin HCl	Cl.COC1=C2C(=O)C3=C(C(=C4CC(O)(CC(OC5CC(N)C(O)C(C)O5)C4=C3O)C(C)=O)O)C(=O)C2=CC=C1	1.01	6	4	4
S3036	Pravastatin sodium	e2	L8000-09	in 10mM DMSO	HMG-CoA Reductase	Metabolism	Pravastatin sodium (CS-514) is an HMG-CoA reductase inhibitor against sterol synthesis with IC50 of 5.6 μM.	446.51	81131-70-6	89	199.32	89	199.32	http://selleckchem.com/products/pravastatin-pravachol.html	C23H35O7.Na	sodium	CS-514 Sodium	[Na+].CCC(C)C(=O)OC1CC(O)C=C2C=CC(C)C(CCC(O)CC(O)CC([O-])=O)C12	0.682	2	3	11
S3037	Bepotastine Besilate	f2	L8000-09	in 10mM DMSO	COVID-19,Histamine Receptor	Neuronal Signaling	Bepotastine Besilate (TAU 284) is a non-sedating, selective antagonist of histamine 1 (H1) receptor with pIC50 of 5.7.	547.06	190786-44-8	109	199.25	<1	N/A	http://selleckchem.com/products/bepotastine-besilate.html	C21H25ClN2O3.C6H6O3S	Besilate salt	TAU 284	OC(=O)CCCN1CCC(CC1)OC(C2=CC=C(Cl)C=C2)C3=NC=CC=C3.O[S](=O)(=O)C4=CC=CC=C4	1.371	3	0	9
S3038	Fosaprepitant dimeglumine salt	g2	L8000-09	in 10mM DMSO	Neurokinin Receptor	Neuronal Signaling	Fosaprepitant dimeglumine salt (MK-0517) is a water-soluble phosphoryl prodrug for Aprepitant which is a NK1 antagonist.	1004.83	265121-04-8	201	200.03	135	134.35	http://selleckchem.com/products/fosaprepitant.html	C23H22F7N4O6P.2C7H17NO5	dimeglumine salt	MK-0517	CNCC(O)C(O)C(O)C(O)CO.CNCC(O)C(O)C(O)C(O)CO.CC(OC1OCCN(CC2=NN(C(=O)N2)[P](O)(O)=O)C1C3=CC=C(F)C=C3)C4=CC(=CC(=C4)C(F)(F)F)C(F)(F)F	-1.235	4	13	21
S3043	Rofecoxib	h2	L8000-09	in 10mM DMSO	COX	Neuronal Signaling	Rofecoxib (MK-0966) is a COX-2 inhibitor with IC50 of 18 nM.	314.36	162011-90-7	63	200.41	<1	N/A	http://selleckchem.com/products/rofecoxib-vioxx.html	C17H14O4S	free base	MK-0966	C[S](=O)(=O)C1=CC=C(C=C1)C2=C(C(=O)OC2)C3=CC=CC=C3	2.871	4	0	3
S3046	Azilsartan	a3	L8000-09	in 10mM DMSO	Angiotensin Receptor	GPCR & G Protein	Azilsartan (TAK-536) is an angiotensin II type 1 (AT1) receptor antagonist with IC50 of 2.6 nM.	456.45	147403-03-0	91	199.36	<1	N/A	http://selleckchem.com/products/azilsartan-tak-536.html	C25H20N4O5	free base	TAK-536	CCOC1=NC2=CC=CC(=C2[N]1CC3=CC=C(C=C3)C4=CC=CC=C4C5=NC(=O)ON5)C(O)=O	4.662	6	1	7
S3047	Otilonium Bromide	b3	L8000-09	in 10mM DMSO	AChR	Neuronal Signaling	Otilonium bromide is an antimuscarinic.	563.57	26095-59-0	113	200.51	113	200.51	http://selleckchem.com/products/otilonium-bromide.html	C29H43BrN2O4	quaternary-N bromide salt	N/A	[Br-].CCCCCCCCOC1=CC=CC=C1C(=O)NC2=CC=C(C=C2)C(=O)OCC[N+](C)(CC)CC	2.67	4	1	17
S3052	Rupatadine Fumarate	c3	L8000-09	in 10mM DMSO	Histamine Receptor	Neuronal Signaling	Rupatadine is an inhibitor of PAFR and histamine (H1) receptor with Ki of 550 nM and 102 nM, respectively.	532.03	182349-12-8	9	16.92	<1	N/A	http://selleckchem.com/products/rupatadine-fumarate.html	C26H26ClN3.C4H4O4	Fumarate	N/A	CC1=CN=CC(=C1)CN2CCC(CC2)=C3C4=CC=C(Cl)C=C4CCC5=CC=CN=C35.OC(=O)\C=C\C(O)=O	2.672	4	0	4
S3054	Alverine Citrate	d3	L8000-09	in 10mM DMSO	5-HT Receptor	Neuronal Signaling	Alverine citrate (NSC 35459) is a drug used for functional gastrointestinal disorders. Alverine citrate is a 5-HT1A receptor antagonist, with an IC50 of 101 nM.	473.56	5560-59-8	95	200.61	<1	N/A	http://selleckchem.com/products/alverine-citrate.html	C20H27N.C6H8O7	Citrate	NSC 35459	CCN(CCCC1=CC=CC=C1)CCCC2=CC=CC=C2.OC(=O)CC(O)(CC(O)=O)C(O)=O	1.037	3	0	14
S3057	Azilsartan Medoxomil	e3	L8000-09	in 10mM DMSO	Angiotensin Receptor	GPCR & G Protein	Azilsartan Medoxomil (TAK-491) is a potent angiotensin II type 1 (AT1) receptor antagonist, inhibits the RAAS, with an IC50 of 2.6 nM, exhibits >10,000-fold selectivity over AT2.	568.53	863031-21-4	114	200.52	<1	N/A	http://selleckchem.com/products/azilsartan-medoxomil-tak-491.html	C30H24N4O8	free base	TAK-491	CCOC1=NC2=CC=CC(=C2[N]1CC3=CC=C(C=C3)C4=CC=CC=C4C5=NC(=O)ON5)C(=O)OCC6=C(C)OC(=O)O6	5.27	10	1	10
S3067	Chlorhexidine 2HCl	f3	L8000-09	in 10mM DMSO	Anti-infection	Microbiology	Chlorhexidine hydrochloride (NSC-185) is an antiseptic effective against a wide variety of gram-negative and gram-positive organisms.	578.37	3697-42-5	100	172.9	<1	N/A	http://selleckchem.com/products/chlorhexidine-hcl.html	C22H30Cl2N10.2HCl	HCl	NSC-185	Cl.Cl.ClC1=CC=C(NC(=N)NC(=N)NCCCCCCNC(=N)NC(=N)NC2=CC=C(Cl)C=C2)C=C1	5.137	0	6	17
S3078	Beclomethasone dipropionate	h3	L8000-09	in 10mM DMSO	Glucocorticoid Receptor	Endocrinology & Hormones	Beclomethasone dipropionate(Beclovent,Beconase,Vancenase) is a potent glucocorticoid steroid used for the treatment of rhinitis and sinusitis.	521.04	5534-09-8	104	199.6	<1	N/A	http://selleckchem.com/products/beclomethasone-dipropionate.html	C28H37ClO7	free base	Beclometasone dipropionate,Beclovent,Beconase,Vancenase	CCC(=O)OCC(=O)C1(OC(=O)CC)C(C)CC2C3CCC4=CC(=O)C=CC4(C)C3(Cl)C(O)CC12C	4.064	6	1	8
S3079	Atovaquone	a4	L8000-09	in 10mM DMSO	COVID-19,Fungal,Parasite	Microbiology	Atovaquone (Atavaquone) is a medication used to treat or prevent for pneumocystis pneumonia, toxoplasmosis, malaria, and babesia.	366.84	95233-18-4	5	13.63	<1	N/A	http://selleckchem.com/products/atovaquone-atavaquone.html	C22H19ClO3	free base	Atavaquone	OC1=C(C2CCC(CC2)C3=CC=C(Cl)C=C3)C(=O)C4=C(C=CC=C4)C1=O	5.319	2	1	2
S3080	Etravirine (TMC125)	b4	L8000-09	in 10mM DMSO	Reverse Transcriptase	Microbiology	Etravirine (TMC125, R-165335) is a non-nucleoside reverse transcriptase inhibitor (NNRTI) used for the treatment of HIV.	435.28	269055-15-4	42	96.49	<1	N/A	http://selleckchem.com/products/etravirine-tmc125.html	C20H15BrN6O	free base	R-165335	CC1=CC(=CC(=C1OC2=C(Br)C(=NC(=N2)NC3=CC=C(C=C3)C#N)N)C)C#N	5.492	3	2	4
S3081	Ulipristal Acetate (CDB 2914)	c4	L8000-09	in 10mM DMSO	Estrogen/progestogen Receptor	Endocrinology & Hormones	Ulipristal acetate (CDB-2914, HRP 2000, RU 44675) is a selective SPRM for emergency contraception after an unprotected intercourse or contraceptive failure.	475.62	126784-99-4	83	191.43	<1	N/A	http://selleckchem.com/products/ulipristal.html	C30H37NO4	free base	HRP 2000, RU 44675	CN(C)C1=CC=C(C=C1)C2CC3(C)C(CCC3(OC(C)=O)C(C)=O)C4CCC5=CC(=O)CCC5=C24	4.309	2	0	3
S3083	Indacaterol Maleate	d4	L8000-09	in 10mM DMSO	Adrenergic Receptor	Neuronal Signaling	Indacaterol (QAB149) is an ultra-long-acting β-adrenoceptor agonist with pKi of 7.36 for β1-adrenoceptor and pKi of 5.48 for β2-adrenoceptor.	508.56	753498-25-8	102	200.57	<1	N/A	http://selleckchem.com/products/indacaterol-maleate.html	C24H28N2O3.C4H4O4	Maleate	QAB149	CCC1=CC2=C(CC(C2)NCC(O)C3=CC=C(O)C4=C3C=CC(=O)N4)C=C1CC.OC(=O)\C=C/C(O)=O	1.264	3	4	8
S3100	2-Thiouracil	e4	L8000-09	in 10mM DMSO	Hydroxylase	Neuronal Signaling	2-Thiouracil(Deracil,Thiouracil) is a thiolated uracil derivative that is a known antihyperthyroid agent.	128.15	141-90-2	26	202.89	<1	N/A	http://selleckchem.com/products/2-thiouracil.html	C4H4N2OS	free base	Deracil,Thiouracil	O=C1NC(=S)NC=C1	0.081	1	2	0
S3104	Moguisteine	f4	L8000-09	in 10mM DMSO	Others	Others	Moguisteine(BBR-2173) is a novel peripheral non-narcotic antitussive drug.	339.41	119637-67-1	68	200.35	<1	N/A	http://selleckchem.com/products/moguisteine.html	C16H21NO5S	free base	BBR-2173	CCOC(=O)CC(=O)N1CCSC1COC2=CC=CC=C2OC	2.212	5	0	8
S3105	Nadifloxacin	g4	L8000-09	in 10mM DMSO	Antibiotics	Microbiology	Nadifloxacin (OPC-7251) is a topical fluoroquinolone antibiotic for the treatment of acne vulgaris.	360.38	124858-35-1	20	55.5	<1	N/A	http://selleckchem.com/products/nadifloxacin.html	C19H21FN2O4	free base	OPC-7251	CC1CCC2=C3N1C=C(C(O)=O)C(=O)C3=CC(=C2N4CCC(O)CC4)F	1.865	2	1	2
S3116	Sulfathiazole	h4	L8000-09	in 10mM DMSO	Anti-infection	Microbiology	Sulfathiazole is an organosulfur compound that has been used as a short-acting sulfa drug.	255.32	72-14-0	51	199.75	<1	N/A	http://selleckchem.com/products/sulfathiazole.html	C9H9N3O2S2	free base	N/A	NC1=CC=C(C=C1)[S](=O)(=O)NC2=NC=CS2	0.568	3	2	3
S3117	Oxybutynin hydrochloride	a5	L8000-09	in 10mM DMSO	AChR	Neuronal Signaling	Oxybutynin(MJ4309-1) is an anticholinergic medication used to relieve urinary and bladder difficulties.	393.95	1508-65-2	79	200.53	4	10.15	https://www.selleckchem.com/products/oxybutynin-hydrochloride.html	C22H31NO3.HCl	hydrochloride	MJ4309-1	Cl.CCN(CC)CC#CCOC(=O)C(O)(C1CCCCC1)C2=CC=CC=C2	5.028	2	0	10
S3120	Doxepin HCl	b5	L8000-09	in 10mM DMSO	Histamine Receptor	Neuronal Signaling	Doxepin is a tricyclic antidepressant formulated as a mixture of E-(trans) and Z-(cis) stereoisomers. It inhibits CYP2D6 activity in vivo.	315.84	1229-29-4	63	199.47	63	199.47	http://selleckchem.com/products/doxepin-hydrochloride-sinequan.html	C19H21NO.HCl	hydrochloride	N/A	Cl.CN(C)CC\C=C1/C2=CC=CC=C2COC3=C1C=CC=C3	4.29	1	0	3
S3124	Dexamethasone Acetate	c5	L8000-09	in 10mM DMSO	Complement System,COVID-19,IL Receptor	Immunology & Inflammation	Dexamethasone (NSC 39471,Dexamethasone 21-acetate) is a potent synthetic member of the glucocorticoid class of steroid drugs, and an interleukin receptor modulator that has anti-inflammatory and immunosuppressant effects.	434.5	1177-87-3	87	200.23	<1	N/A	http://selleckchem.com/products/dexamethasone-acetate.html	C24H31FO6	free base	NSC 39471,Dexamethasone 21-acetate	CC1CC2C3CCC4=CC(=O)C=CC4(C)C3(F)C(O)CC2(C)C1(O)C(=O)COC(C)=O	2.087	4	1	4
S3129	Trimethoprim	d5	L8000-09	in 10mM DMSO	Antibiotics,Bacterial,DHFR	Microbiology	Trimethoprim (BW 56-72, NIH 204, NSC-106568) is a bacteriostatic antibiotic mainly used in the prophylaxis and treatment of urinary tract infections.	290.32	738-70-5	58	199.78	<1	N/A	http://selleckchem.com/products/trimethoprim.html	C14H18N4O3	free base	BW 56-72, NIH 204, NSC-106568	COC1=C(OC)C(=CC(=C1)CC2=CN=C(N)N=C2N)OC	1.543	5	2	5
S3132	Sulfamerazine	e5	L8000-09	in 10mM DMSO	Bacterial	Microbiology	Sulfamerazine (RP 2632,sulphamerazine) is a sulfonamide antibacterial.	264.3	127-79-7	53	200.53	<1	N/A	http://selleckchem.com/products/sulfamerazine.html	C11H12N4O2S	free base	RP 2632,sulphamerazine	CC1=NC(=NC=C1)N[S](=O)(=O)C2=CC=C(N)C=C2	0.595	4	2	3
S3137	Sodium salicylate	f5	L8000-09	in 10mM DMSO	NF-κB	NF-κB	Sodium salicylate(2-Hydroxybenzoic acid Sodium salt,Salicylic acid Sodium salt) is used in medicine as an analgesic and antipyretic.	161.11	54-21-7	32	198.62	32	198.62	http://selleckchem.com/products/sodium-salicylate.html	C7H6O3.Na	sodium salt	2-Hydroxybenzoic acid Sodium salt,Salicylic acid Sodium salt	[NaH].OC(=O)C1=CC=CC=C1O	1.217	1	1	1
S3138	Methylthiouracil	g5	L8000-09	in 10mM DMSO	ERK,Interleukins,NF-κB,TNF-alpha	NF-κB	Methylthiouracil (NSC-193526, NSC-9378,MTU) is an antithyroid agent. Methylthiouracil suppresses the production TNF-α and IL-6, and the activation of NF-κB and ERK1/2.	142.18	56-04-2	28	196.93	<1	N/A	http://selleckchem.com/products/methylthiouracil.html	C5H6N2OS	free base	NSC-193526, NSC-9378,MTU	CC1=CC(=O)NC(=S)N1	0.595	1	2	0
S3144	Darifenacin HBr	h5	L8000-09	in 10mM DMSO	AChR	Neuronal Signaling	Darifenacin HBr (UK-88525) is a selective M3 muscarinic receptor antagonist with pKi of 8.9.	507.46	133099-07-7	100	197.06	<1	N/A	http://selleckchem.com/products/darifenacin-hydrobromide.html	C28H30N2O2.HBr	HBr	UK-88525	Br.NC(=O)C(C1CCN(CCC2=CC=C3OCCC3=C2)C1)(C4=CC=CC=C4)C5=CC=CC=C5	5.048	2	1	7
S3149	Estradiol valerate	a6	L8000-09	in 10mM DMSO	Estrogen/progestogen Receptor	Endocrinology & Hormones	Estradiol(E2V) is a synthetic ester used to treat menopausal symptoms and hormone deficiencies.	356.5	979-32-8	71	199.16	<1	N/A	http://selleckchem.com/products/estradiol-valerate.html	C23H32O3	free base	E2V	CCCCC(=O)OC1CCC2C3CCC4=CC(=CC=C4C3CCC12C)O	5.796	2	1	5
S3151	Gliquidone	b6	L8000-09	in 10mM DMSO	Potassium Channel	Transmembrane Transporters	Gliquidone (Glurenorm,AR-DF 26) is an ATP-sensitive K+ channel antagonist with IC50 of 27.2 nM.	527.63	33342-05-1	105	199	<1	N/A	http://selleckchem.com/products/gliquidone.html	C27H33N3O6S	free base	Glurenorm,AR-DF 26	COC1=CC2=C(C=C1)C(C)(C)C(=O)N(CCC3=CC=C(C=C3)[S](=O)(=O)NC(=O)NC4CCCCC4)C2=O	4.214	6	2	7
S3160	Ethynodiol diacetate	c6	L8000-09	in 10mM DMSO	Estrogen/progestogen Receptor	Endocrinology & Hormones	Ethynodiol diacetate (8080 CB,Ethynodiol acetate) is one of the first synthetic progestogens used in contraceptive pills.	384.51	297-76-7	77	200.25	77	200.25	http://selleckchem.com/products/ethynodiol-diacetate.html	C24H32O4	free base	8080 CB,Ethynodiol acetate	CC(=O)OC1CCC2C3CCC4(C)C(CCC4(OC(C)=O)C#C)C3CCC2=C1	4.973	4	0	4
S3162	Tylosin tartrate	d6	L8000-09	in 10mM DMSO	Antibiotics,Antibiotics for Mammalian Cell Culture	Microbiology	Tylosin tartrate is a macrolide antibiotic approved for the control of mycoplasmosis in poultry.	1066.19	74610-55-2	300	281.38	200	187.58	http://selleckchem.com/products/tylosin-tartrate.html	C46H77NO17.C4H6O6	Tartrate	N/A	CCC1OC(=O)CC(O)C(C)C(OC2OC(C)C(OC3CC(C)(O)C(O)C(C)O3)C(C2O)N(C)C)C(CC=O)CC(C)C(=O)\C=C\C(=C\C1COC4OC(C)C(O)C(OC)C4OC)C.OC(C(O)C(O)=O)C(O)=O	-2.989	14	6	16
S3167	Altrenogest	e6	L8000-09	in 10mM DMSO	Estrogen/progestogen Receptor	Endocrinology & Hormones	Altrenogest (A35957, RU2267,R2267) is a progestogen structurally related to veterinary steroid trenbolone.	310.43	850-52-2	62	199.72	<1	N/A	http://selleckchem.com/products/altrenogest.html	C21H26O2	free base	A35957, RU2267,R2267	CC12C=CC3=C4CCC(=O)C=C4CCC3C1CCC2(O)CC=C	3.561	1	0	2
S3170	Ampicillin sodium	f6	L8000-09	in 10mM DMSO	Antibiotics,Antibiotics for Mammalian Cell Culture,Selection Antibiotics for Transfected Cell	Microbiology	Ampicillin(D-(-)-α-Aminobenzylpenicillin sodium salt) is a beta-lactam antibiotic that is part of the aminopenicillin family.	371.39	69-52-3	37	99.63	74	199.25	http://selleckchem.com/products/ampicillin-sodium.html	C16H18N3NaO4S	Sodium	D-(-)-α-Aminobenzylpenicillin sodium salt	[Na+].CC1(C)SC2C(NC(=O)C(N)C3=CC=CC=C3)C(=O)N2C1C([O-])=O	-1.292	2	2	4
S3172	Anagrelide HCl	g6	L8000-09	in 10mM DMSO	PDE	Metabolism	Anagrelide (BL-4162A,BMY 26538-01) is a drug used for the treatment of essential thrombocytosis.	292.55	58579-51-4	14	47.86	<1	N/A	http://selleckchem.com/products/anagrelide-hydrochloride.html	C10H7Cl2N3O.HCl	Hydrochloride	BL-4162A,BMY 26538-01	Cl.ClC1=CC=C2NC3=NC(=O)CN3CC2=C1Cl	2.347	2	1	0
S3173	Antipyrine	h6	L8000-09	in 10mM DMSO	COX	Neuronal Signaling	Antipyrine (Phenazone,Phenazon) is an analgesic and antipyretic agent; selective COX-3 inhibitor.	188.23	60-80-0	38	201.88	38	201.88	http://selleckchem.com/products/antipyrine.html	C11H12N2O	free base	Phenazone,Phenazon	CN1N(C(=O)C=C1C)C2=CC=CC=C2	1.218	1	0	1
S3175	Atomoxetine HCl	a7	L8000-09	in 10mM DMSO	5-HT Receptor	Neuronal Signaling	Atomoxetine (LY 139603) is a selective norepinephrine (NE) transporter inhibitor with Ki of 5 nM, with 15- and 290-fold lower affinity for human 5-HT and DA transporters.	291.82	82248-59-7	58	198.75	2	6.85	http://selleckchem.com/products/atomoxetine-hydrochloride.html	C17H21NO.HCl	HCl	LY 139603 HCl	Cl.CNCCC(OC1=CC=CC=C1C)C2=CC=CC=C2	3.959	1	1	6
S3176	Betahistine 2HCl	b7	L8000-09	in 10mM DMSO	Histamine Receptor	Neuronal Signaling	Betahistine (PT-9) is a histamine H3 receptor inhibitor with IC50 of 1.9 μM.	209.12	5579-84-0	38	181.71	38	181.71	http://selleckchem.com/products/betahistine-dihydrochloride.html	C8H12N2.2HCl	2HCl	PT-9	Cl.Cl.CNCCC1=NC=CC=C1	1.444	1	1	3
S3178	Brinzolamide	c7	L8000-09	in 10mM DMSO	Carbonic Anhydrase	Metabolism	Brinzolamide (AL-4862) is a potent carbonic anhydrase II inhibitor with IC50 of 3.19 nM.	383.51	138890-62-7	77	200.78	<1	N/A	http://selleckchem.com/products/brinzolamide.html	C12H21N3O5S3	free base	AL-4862	CCNC1CN(CCCOC)[S](=O)(=O)C2=C1C=C(S2)[S](N)(=O)=O	-0.772	5	2	7
S3180	Eletriptan HBr	d7	L8000-09	in 10mM DMSO	5-HT Receptor	Neuronal Signaling	Eletriptan (UK-116044) is a selective 5-HT1B and 5-HT1D receptor agonist with Ki of 0.92 nM and 3.14 nM, respectively.	463.43	177834-92-3	93	200.68	<1	N/A	http://selleckchem.com/products/eletriptan-hydrobromide.html	C22H26N2O2S.HBr	HBr	UK-116044	Br.CN1CCCC1CC2=C[NH]C3=C2C=C(CC[S](=O)(=O)C4=CC=CC=C4)C=C3	4.929	2	1	6
S3181	Flumequine	e7	L8000-09	in 10mM DMSO	Topoisomerase	DNA Damage/DNA Repair	Flumequine(R-802) is a synthetic chemotherapeutic antibiotic, inhibiting topoisomerase II with IC50 of 15 μM.	261.25	42835-25-6	3	11.48	<1	N/A	http://selleckchem.com/products/flumequine.html	C14H12FNO3	free base	R-802	CC1CCC2=C3N1C=C(C(O)=O)C(=O)C3=CC(=C2)F	2.27	2	0	1
S3183	Amitriptyline HCl	f7	L8000-09	in 10mM DMSO	5-HT Receptor,Histamine Receptor,Serotonin Transporter	Neuronal Signaling	Amitriptyline HCl is an inhibitor of both serotonin transporter (SERT) and norepinephrine transporter (NET) with Ki of 3.45 nM and 13.3 nM, respectively. Amitriptyline HCl also inhibits histamine receptor H1, histamine receptor H4, 5-HT2 and sigma 1 receptor with Ki of 0.5 nM, 7.31 nM, 235 nM and 287 nM, respectively. Amitriptyline is a tricyclic antidepressant (TCA).	313.86	549-18-8	63	200.73	15	47.79	http://selleckchem.com/products/amitriptyline-hydrochloride.html	C20H23N.HCl	HCl	N/A	Cl.CN(C)CCC=C1C2=CC=CC=C2CCC3=CC=CC=C13	5.154	0	0	3
S3185	Adrenalone HCl	g7	L8000-09	in 10mM DMSO	Adrenergic Receptor	Neuronal Signaling	Adrenalone is an adrenergic agonist used as a topical vasoconstrictor and hemostatic, mainly acts on alpha-1 adrenergic receptors.	217.65	62-13-5	44	202.16	44	202.16	http://selleckchem.com/products/adrenalone-hcl.html	C9H11NO3.HCl	HCl	N/A	Cl.CNCC(=O)C1=CC(=C(O)C=C1)O	0.938	1	3	3
S3186	Azatadine dimaleate	h7	L8000-09	in 10mM DMSO	Histamine Receptor	Neuronal Signaling	Azatadine (SCH10649,Azatadine Maleate) is an histamine and cholinergic inhibitor with IC50 of 6.5 nM and 10 nM, respectively.	522.55	3978-86-7	105	200.94	105	200.94	http://selleckchem.com/products/azatadine-dimaleate.html	C20H22N2.2C4H4O4	Dimaleate	SCH10649,Azatadine Maleate	CN1CCC(CC1)=C2C3=CC=CC=C3CCC4=CC=CN=C24.OC(=O)\C=C/C(O)=O.OC(=O)\C=C/C(O)=O	1.128	5	0	4
S3195	Azlocillin sodium salt	b8	L8000-09	in 10mM DMSO	Bacterial	Microbiology	Azlocillin is an acylampicillin with a broad spectrum against bacteria.	484.48	37091-65-9	97	200.21	97	200.21	http://selleckchem.com/products/azlocillin-sodium-salt.html	C20H23N5O6S.Na	Sodium Salt	N/A	[NaH].CC1(C)SC2C(NC(=O)C(NC(=O)N3CCNC3=O)C4=CC=CC=C4)C(=O)N2C1C(O)=O	0.004	5	3	5
S3200	Triflusal	c8	L8000-09	in 10mM DMSO	COX	Immunology & Inflammation	Triflusal (UR1501) irreversibly inhibits the production of thromboxane-B2 in platelets by acetylating cycloxygenase-1.	248.16	322-79-2	50	201.48	<1	N/A	http://selleckchem.com/products/triflusal.html	C10H7F3O4	free base	UR1501	CC(=O)OC1=CC(=CC=C1C(O)=O)C(F)(F)F	2.169	3	0	4
S3201	Trifluoperazine 2HCl	d8	L8000-09	in 10mM DMSO	Dopamine Receptor	Neuronal Signaling	Trifluoperazine (NSC-17474, RP-7623, SKF-5019) 2HCl is a dopamine D2 receptor inhibitor with IC50 of 1.1 nM. Trifluoperazine also inhibits calmodulin (CaM).	480.42	440-17-5	88	183.17	96	199.83	http://selleckchem.com/products/trifluoperazine-dihydrochloride.html	C21H24F3N3S.2HCl	2HCl	SKF5019	Cl.Cl.CN1CCN(CCCN2C3=C(SC4=CC=C(C=C24)C(F)(F)F)C=CC=C3)CC1	5.739	0	0	5
S3202	Catharanthine	e8	L8000-09	in 10mM DMSO	AChR	Neuronal Signaling	Catharanthine inhibits nicotinic receptor mediated diaphragm contractions with IC50 of 59.6 μM.	336.43	2468-21-5	67	199.15	<1	N/A	http://selleckchem.com/products/catharanthine.html	C21H24N2O2	free base	N/A	CCC1=CC2CN3CCC4=C([NH]C5=CC=CC=C45)C(C2)(C13)C(=O)OC	3.877	2	1	3
S3212	Moclobemide (Ro 111163)	f8	L8000-09	in 10mM DMSO	MAO	Metabolism	Moclobemide is a MAO-A (5-HT) inhibitor with IC50 of 6.1 μM.	268.74	71320-77-9	53	197.22	<1	N/A	http://selleckchem.com/products/moclobemide.html	C13H17ClN2O2	free base	N/A	ClC1=CC=C(C=C1)C(=O)NCCN2CCOCC2	1.528	2	1	4
S3604	Triptolide (PG490)	g8	L8000-09	in 10mM DMSO	ADC Cytotoxin,Apoptosis related,HSP (HSP90),MDM2/MDMX,NF-κB	NF-κB	Triptolide (PG490, NSC 163062) is a diterpene triepoxide, immunosuppresive agent extracted from the Chinese herb Tripterygium wilfordii. It functions as a NF-κB inhibitor with dual actions by disruption of p65/CBP interaction and by reduction of p65 protein. Triptolide (PG490) abrogates the transactivation function of heat shock transcription factor 1 (HSF1). Triptolide inhibits MDM2 and induces …	360.4	38748-32-2	72	199.78	<1	N/A	http://selleckchem.com/products/triptolide.html	C20H24O6	free base	NSC 163062	CC(C)C12OC1C3OC34C5(C)CCC6=C(COC6=O)C5CC7OC47C2O	0.872	5	1	1
S3606	Fangchinoline	h8	L8000-09	in 10mM DMSO	Reverse Transcriptase	Microbiology	Fangchinoline, a bisbenzylisoquinoline alkaloid, is a novel HIV-1 inhibitor with pain-relieving, blood pressure-depressing, and antibiotic activities.	608.72	33889-68-8	100	164.28	<1	N/A	http://selleckchem.com/products/r-s-fangchinoline.html	C37H40N2O6	free base	N/A	COC1=C2OC3=CC=C(CC4N(C)CCC5=C4C=C(OC6=C(O)C(=CC7=C6C(CC(=C2)C=C1)N(C)CC7)OC)C(=C5)OC)C=C3	6.992	5	1	3
S3609	Berbamine dihydrochloride	a9	L8000-09	in 10mM DMSO	Bcr-Abl,CaMK,NF-κB	Angiogenesis	Berbamine (BA, BBM) dihydrochloride, a traditional Chinese medicines extracted from Berberis amurensis (xiaoboan), is a novel inhibitor of bcr/abl fusion gene with potent anti-leukemia activity and also an inhibitor of NF-κB. Berbamine (BA, BBM) dihydrochloride induces apoptosis in human myeloma cells and inhibits the growth of cancer cells by targeting Ca²⁺/calmodulin-dependent protein kinase II…	681.65	6078-17-7	100	146.7	100	146.7	http://selleckchem.com/products/berbamine-dihydrochloride.html	C37H40N2O6.2HCl	dihydrochloride	BA, BBM	Cl.Cl.COC1=CC2=C3C=C1OC4=C(OC)C(=CC5=C4C(CC6=CC(=C(O)C=C6)OC7=CC=C(CC3N(C)CC2)C=C7)N(C)CC5)OC	7.756	5	1	3
S3611	(+)-Fangchinoline	b9	L8000-09	in 10mM DMSO	Others	Others	Fangchinoline ((+)-Limacine, Tetrandrine B, Hanfangichin B) is a phytochemical that has been shown to elicit anti-cancer effects in prostate and breast cancer cell lines via inducing G1 cell cycle arrest. It has also been shown to possess neuroprotective activity.	608.72	436-77-1	40	65.71	<1	N/A	http://selleckchem.com/products/s-s-fangchinoline.html	C37H40N2O6	free base	(+)-Limacine, Tetrandrine B, Hanfangichin B	COC1=C2OC3=CC=C(CC4N(C)CCC5=C4C=C(OC6=C7C(CC(=C2)C=C1)N(C)CCC7=CC(=C6O)OC)C(=C5)OC)C=C3	6.992	5	1	3
S3612	Rosmarinic acid	c9	L8000-09	in 10mM DMSO	Complement System,IκB/IKK	NF-κB	Rosmarinic acid (RA, Rosemary acid) is a naturally occurring hydroxylated compound. It has the ability to block complement fixation, inhibit lipoxygenase and cyclooxygenase activity and inhibit the expression of CCL11 and CCR3 by suppressing the IKK-β activity in NF-κB activation signaling.	360.31	20283-92-5	72	199.83	24	66.61	http://selleckchem.com/products/rosmarinic-acid.html	C18H16O8	free base	Rosemary acid	OC(=O)C(CC1=CC=C(O)C(=C1)O)OC(=O)\C=C\C2=CC=C(O)C(=C2)O	2.706	3	4	7
S3615	Dehydrocostus Lactone	d9	L8000-09	in 10mM DMSO	IκB/IKK	NF-κB	Dehydrocostus lactone (DHE), a natural sesquiterpene lactone, inhibits IKKβ activity, IκBα phosphorylation and degradation, coactivators p300 recruitments and p50/p65 NF-κB nuclear translocation, and their DNA binding activity on COX-2 promoter. It has anti-inflammatory, anti-ulcer, immunomodulatory and anti-tumor properties.	230.3	477-43-0	46	199.74	<1	N/A	http://selleckchem.com/products/dehydrocostus-lactone.html	C15H18O2	free base	N/A	C=C1CCC2C(OC(=O)C2=C)C3C1CCC3=C	3.282	2	0	0
S3616	Asiaticoside	e9	L8000-09	in 10mM DMSO	ROS	Immunology & Inflammation	Asiaticoside (Ba 2742, BRN0078195, CCRIS8995, NSC166062, Emdecassol,Madecassol), the major active principle of Centella asiatica, prevents ultraviolet A-dependent photoaging by suppressing ultraviolet A-induced reactive oxygen species production. It also decreases DNA binding by MITF.	959.12	16830-15-2	100	104.26	<1	N/A	http://selleckchem.com/products/asiaticoside.html	C48H78O19	free base	Ba 2742, BRN0078195, CCRIS8995, NSC166062, Emdecassol,Madecassol	CC1CCC2(CCC3(C)C(=CCC4C5(C)CC(O)C(O)C(C)(CO)C5CCC34C)C2C1C)C(=O)OC6OC(COC7OC(CO)C(OC8OC(C)C(O)C(O)C8O)C(O)C7O)C(O)C(O)C6O	-0.101	7	12	10
S3621	Pazufloxacin mesylate	f9	L8000-09	in 10mM DMSO	Bacterial	Microbiology	Pazufloxacin Mesylate (T-3762, Pazucross), also known as Pazucross and T-3762, is a quinolone antibacterial agent used for the intravenous therapy of several infections.	414.41	163680-77-1	82	197.87	82	197.87	http://selleckchem.com/products/pazufloxacin-mesylate.html	C16H15FN2O4.CH4O3S	methanesulfonate	T-3762, Pazucross	CC1COC2=C(C(=CC3=C2N1C=C(C(O)=O)C3=O)F)C4(N)CC4.C[S](O)(=O)=O	-1.899	3	1	2
S3622	Diammonium Glycyrrhizinate	g9	L8000-09	in 10mM DMSO	Immunology & Inflammation related	Immunology & Inflammation	Diammonium glycyrrhizinate (DG), a traditional Chinese medicine (TCM), is extracted and purified from liquorices (Radix glycyrrhizae). It is known for its anti-inflammatory effects, resistance to biologic oxidation and membranous protection. DG is able to reduce inflammatory injury via suppression of NF‑κB, TNF‑α and intercellular adhesion molecule 1.	856.99	79165-06-3	100	116.69	100	116.69	http://selleckchem.com/products/diammonium-glycyrrhizinate.html	C42H62O16.2H3N	ammonium salt	N/A	N.N.CC1(C)C(CCC2(C)C1CCC3(C)C2C(=O)C=C4C5CC(C)(CCC5(C)CCC34C)C(O)=O)OC6OC(C(O)C(O)C6OC7OC(C(O)C(O)C7O)C(O)=O)C(O)=O	-4.247	8	5	7
S3625	Tyramine	h9	L8000-09	in 10mM DMSO	TAAR	GPCR & G Protein	Tyramine (4-hydroxyphenethylamine, para-tyramine, mydrial, uteramin) is a naturally occurring trace amine derived from the amino acid tyrosine and acts as a catecholamine releasing agent.	137.18	51-67-2	27	196.82	<1	N/A	http://selleckchem.com/products/tyramine.html	C8H11NO	free base	4-hydroxyphenethylamine, para-tyramine, mydrial, uteramin	NCCC1=CC=C(O)C=C1	1.015	0	2	2
S3627	Tryptamine	a10	L8000-09	in 10mM DMSO	TAAR	GPCR & G Protein	Tryptamine is a monoamine alkaloid and may play a role as a neuromodulator or neurotransmitter. It is an agonist of hTAAR1. It acts as a non-selective serotonin receptor agonist and serotonin-norepinephrine-dopamine releasing agent (SNDRA).	160.22	61-54-1	32	199.73	<1	N/A	http://selleckchem.com/products/tryptamine.html	C10H12N2	free base	N/A	NCCC1=C[NH]C2=CC=CC=C12	1.55	0	2	2
S3635	Medroxyprogesterone	b10	L8000-09	in 10mM DMSO	Estrogen/progestogen Receptor	Endocrinology & Hormones	Medroxyprogesterone (MP) is a synthetic pregnane steroid and a derivative of progesterone. It is a potent progesterone receptor agonist.	344.49	520-85-4	68	197.39	<1	N/A	http://selleckchem.com/products/medroxyprogesterone.html	C22H32O3	free base	MP	CC1CC2C(CCC3(C)C2CCC3(O)C(C)=O)C4(C)CCC(=O)C=C14	3.376	2	0	1
S3639	Tacrine hydrochloride hydrate	c10	L8000-09	in 10mM DMSO	AChR,HNMT	Neuronal Signaling	Tacrine (Tetrahydroaminacrine, Tetrahydroaminoacridine) is a centerally active cholinesterase inhibitor that has been used to counter the effects of muscle relaxants, as a respiratory stimulant, and in the treatment of Alzheimer's disease and other central nervous system disorders. It also acts as a histamine N-methyltransferase inhibitor.	198.26(free bases)	206658-92-6	50	252.19	50	252.19	http://selleckchem.com/products/tacrine-hydrochloride-hydrate.html	C13H14N2.xHCl.xH2O	hydrochloride hydrate	Tacrine, Tetrahydroaminacrine, Tetrahydroaminoacridine	NC1=C2C=CC=CC2=NC3=C1CCCC3	4.258	1	1	0
S3641	Osalmid	d10	L8000-09	in 10mM DMSO	DNA/RNA Synthesis,RNR	DNA Damage/DNA Repair	Osalmid suppresses ribonucleotide reductase (RNR) activity in a concentration-dependent manner, with a 50% RR activity-inhibitory concentration (IC50) of 8.23 μM.	229.23	526-18-1	45	196.31	<1	N/A	http://selleckchem.com/products/osalmid.html	C13H11NO3	free base	N/A	OC1=CC=C(NC(=O)C2=C(O)C=CC=C2)C=C1	2.13	1	3	2
S3643	Amitraz	e10	L8000-09	in 10mM DMSO	Adrenergic Receptor	Neuronal Signaling	Amitraz (NSC 324552) is a triazapentadiene, an α2 adrenergic agonist and a member of the amidine chemical family. It is a non-systemic acaricide and insecticide.	293.41	33089-61-1	58	197.68	<1	N/A	http://selleckchem.com/products/amitraz.html	C19H23N3	free base	NSC 324552	CN(C=NC1=CC=C(C)C=C1C)C=NC2=CC=C(C)C=C2C	4.825	2	0	4
S3647	Mafenide Acetate	f10	L8000-09	in 10mM DMSO	Carbonic Anhydrase	Metabolism	Mafenide Acetate is a sulfonamide that inhibits the enzyme carbonic anhydrase and is used as topical anti-infective, especially in burn therapy.	246.28	13009-99-9	49	198.96	49	198.96	http://selleckchem.com/products/mafenide-acetate.html	C7H10N2O2S.C2H4O2	acetate	N/A	CC(O)=O.NCC1=CC=C(C=C1)[S](N)(=O)=O	-3.043	3	2	2
S3648	Amlexanox (AA-673)	g10	L8000-09	in 10mM DMSO	Immunology & Inflammation related,IκB/IKK,TBK1	Immunology & Inflammation	Amlexanox (AA-673, CHX-3673, Amoxanox) is an anti-inflammatory antiallergic immunomodulator and also an inhibitor of the protein kinases TBK1 and IKK-ε.	298.29	68302-57-8	59	197.79	<1	N/A	http://selleckchem.com/products/amlexanox.html	C16H14N2O4	free base	CHX-3673, Amoxanox	CC(C)C1=CC2=C(OC3=NC(=C(C=C3C2=O)C(O)=O)N)C=C1	2.969	4	1	2
S3654	Tauroursodeoxycholic Acid (TUDCA)	h10	L8000-09	in 10mM DMSO	Mitochondrial Metabolism	Neuronal Signaling	Tauroursodeoxycholic acid (TUDCA) is the taurine conjugate of ursodeoxycholic acid (UDCA) and acts as a mitochondrial stabilizer and anti-apoptotic agent in several models of neurodegenerative diseases, including AD, Parkinson's diseases (PD), and Huntington's diseases (HD).	499.7	14605-22-2	99	198.12	30	60.04	http://selleckchem.com/products/tauroursodeoxycholic-acid.html	C26H45NO6S	free base	N/A	CC(CCC(=O)NCC[S](O)(=O)=O)C1CCC2C3C(O)CC4CC(O)CCC4(C)C3CCC12C	2.997	1	3	7
S3655	Cefepime Dihydrochloride Monohydrate	a11	L8000-09	in 10mM DMSO	Bacterial	Microbiology	Cefepime is a cephalosporin antibacterial drug used to treat pneumonia, urinary tract, skin, and intra-abdominal infections.	571.5	123171-59-5	100	174.98	1	1.75	http://selleckchem.com/products/cefepime-dihydrochloride-monohydrate.html	C19H25N6O5S2.HCl.Cl.H2O	dihydrochloride hydrate	N/A	O.Cl.Cl.CO\N=C(/C(=O)NC1C2SCC(=C(N2C1=O)C([O-])=O)C[N+]3(C)CCCC3)C4=CSC(=N4)N	-2.421	5	2	7
S3656	Piribedil	b11	L8000-09	in 10mM DMSO	Adrenergic Receptor,Dopamine Receptor	Neuronal Signaling	Piribedil (Trivastal, Trivastan) is a relatively selective dopamine (D2/D3) agonist with moderate antidepressant activity. It also has α2-adrenergic (α2A/α2C) antagonist properties.	298.34	3605-01-4	59	197.76	<1	N/A	http://selleckchem.com/products/piribedil.html	C16H18N4O2	free base	Trivastal, Trivastan	C1OC2=CC=C(CN3CCN(CC3)C4=NC=CC=N4)C=C2O1	2.043	4	0	3
S3657	Promestriene	c11	L8000-09	in 10mM DMSO	Estrogen/progestogen Receptor	Endocrinology & Hormones	Promestriene (3-propyl ethyl, 17B-methyl estradiol) is a synthetic estrogen analog that has been reported to significantly improve the symptoms of vaginal atrophy caused by estrogen deprivation in topical application.	328.49	39219-28-8	65	197.88	3	9.13	http://selleckchem.com/products/promestriene.html	C22H32O2	free base	3-propyl ethyl, 17B-methyl estradiol	CCCOC1=CC2=C(C=C1)C3CCC4(C)C(CCC4C3CC2)OC	5.344	2	0	4
S3659	Fludrocortisone acetate	d11	L8000-09	in 10mM DMSO	Others	Others	Fludrocortisone (9α-fluorocortisol) is a synthetic pregnane steroid and a halogenated derivative of cortisol. It is used to treat adrenogenital syndrome, postural hypotension, and adrenal insufficiency.	422.49	514-36-3	84	198.82	<1	N/A	http://selleckchem.com/products/fludrocortisone-acetate.html	C23H31FO6	free base	9α-fluorocortisol acetate	CC(=O)OCC(=O)C1(O)CCC2C3CCC4=CC(=O)CCC4(C)C3(F)C(O)CC12C	1.791	4	1	4
S3666	Ilaprazole	e11	L8000-09	in 10mM DMSO	ATPase,Proton Pump	Transmembrane Transporters	Ilaprazole (IY-81149) is a new proton pump inhibitor (PPI) used in the treatment of dyspepsia, peptic ulcer disease (PUD), gastroesophageal reflux disease (GORD/GERD) and duodenal ulcer. It inhibits H+/K+-ATPase with an IC50 of 6.0 μM.	366.44	172152-36-2	73	199.21	<1	N/A	http://selleckchem.com/products/ilaprazole.html	C19H18N4O2S	free base	IY-81149	COC1=CC=NC(=C1C)C[S](=O)C2=NC3=C([NH]2)C=C(C=C3)[N]4C=CC=C4	3.311	4	1	5
S3668	Thymopentin	f11	L8000-09	in 10mM DMSO	Immunology & Inflammation related	Immunology & Inflammation	Thymopentin (TP5) has immuno-regulatory activities. The immuno-regulatory actions of thymopentin on peripheral T cells are mediated by intracellular cyclic GMP elevations in contrast to the intracellular cyclic AMP elevations induced in precursor T cells that trigger their further differentiation to T cells.	679.77	69558-55-0	100	147.11	100	147.11	http://selleckchem.com/products/thymopentin.html	C30H49N9O9	free base	TP5	CC(C)C(NC(=O)C(CC(O)=O)NC(=O)C(CCCCN)NC(=O)C(N)CCCNC(N)=N)C(=O)NC(CC1=CC=C(O)C=C1)C(O)=O	-6.675	6	9	23
S3669	Carmustine	g11	L8000-09	in 10mM DMSO	DNA/RNA Synthesis	DNA Damage/DNA Repair	Carmustine (bis-chloroethylnitrosourea, BCNU, BiCNU) is a cell-cycle phase nonspecific alkylating antineoplastic agent and used in the treatment of brain tumors and various other malignant neoplasms.	214.05	154-93-8	The physical form of the compound is liquid, which can be dissolved in any proportion.	N/A	N/A	N/A	http://selleckchem.com/products/carmustine.html	C5H9Cl2N3O2	free base	bis-chloroethylnitrosourea, BCNU, BiCNU	ClCCNC(=O)N(CCCl)N=O	1.201	2	1	5
S3671	Quinestrol	h11	L8000-09	in 10mM DMSO	Estrogen/progestogen Receptor	Endocrinology & Hormones	Quinestrol (Ethinylestradiol 3-cyclopentyl ether, EE2CPE, W-3566) is a synthetic, steroidal estrogen which is used in hormone replacement therapy and occasionally to treat breast cancer and prostate cancer.	364.52	152-43-2	72	197.52	<1	N/A	http://selleckchem.com/products/quinestrol.html	C25H32O2	free base	Ethinylestradiol 3-cyclopentyl ether, EE2CPE, W-3566	CC12CCC3C(CCC4=C3C=CC(=C4)OC5CCCC5)C1CCC2(O)C#C	6.514	1	0	2
S3672	Cefonicid sodium	a2	L8000-10	in 10mM DMSO	Antibiotics,Bacterial	Microbiology	Cefonicid sodium (Monocid) is a cephalosporin antibiotic. It interferes with cell wall biosynthesis in bacteria, leading to lysis of the infectious organism.	586.53	61270-78-8	100	170.49	100	170.49	http://selleckchem.com/products/cefonicid-sodium.html	C18H16N6O8S3.2Na	disodium salt	Monocid sodium	[Na+].[Na+].OC(C(=O)NC1C2SCC(=C(N2C1=O)C([O-])=O)CSC3=NN=N[N]3C[S]([O-])(=O)=O)C4=CC=CC=C4	-4.327	5	2	9
S3675	Umbelliferone	b2	L8000-10	in 10mM DMSO	Immunology & Inflammation related	Immunology & Inflammation	Umbelliferone (7-hydroxycoumarin, hydrangine, skimmetine, beta-umbelliferone) is a 7-hydroxycoumarin that is a pharmacologically active agent. It is a fluorescing compound used as a sunscreen agent and shows good inhibitions of DPPH, hydroxyl, superoxide anion and ABTS radicals with anti-inflammatory, anti-hyperglycaemic, molluscicidal and anti-tumor activities.	162.14	93-35-6	32	197.36	<1	N/A	http://selleckchem.com/products/umbelliferone.html	C9H6O3	free base	7-hydroxycoumarin, hydrangine, skimmetine, beta-umbelliferone	OC1=CC2=C(C=C1)C=CC(=O)O2	1.657	2	1	0
S3676	Carbendazim	c2	L8000-10	in 10mM DMSO	Fungal	Microbiology	Carbendazim (Mercarzole, Carbendazole) is a broad-spectrum systemic antimycotic and can be used to control a broad range of diseases on field crops, fruits, and vegetables, including sclerotinia rot of canola, wheat head blight, peanut leaf spot, and SB on rice. Its mode of action is to inhibit the formation of mitotic microtubules in of fungi.	191.19	10605-21-7	17	88.92	<1	N/A	http://selleckchem.com/products/carbendazim.html	C9H9N3O2	free base	Mercarzole, Carbendazole	COC(=O)NC1=NC2=C([NH]1)C=CC=C2	1.65	3	2	2
S3677	Cinnamic acid	d2	L8000-10	in 10mM DMSO	Others	Others	Cinnamic acid (Benzenepropenoic acid, Isocinnamic acid, trans-Cinnamic acid, Phenylacrylic acid), a naturally occurring aromatic fatty acid of low toxicity, induces cytostasis and a reversal of malignant properties of human tumor cells in vitro.	148.16	140-10-3	29	195.73	<1	N/A	http://selleckchem.com/products/cinnamic-acid.html	C9H8O2	free base	trans-Cinnamic acid, Phenylacrylic acid, Cinnamylic acid, 3-Phenylacrylic acid|(E)-Cinnamic acid, Benzenepropenoic acid, Isocinnamic acid	OC(=O)/C=C/C1=CC=CC=C1	1.927	1	0	2
S3681	Vitamin E Acetate	e2	L8000-10	in 10mM DMSO	Vitamin	Metabolism	Vitamin E Acetate (Tocopherol) is the stable form of Vitamin E most often used in cosmetic formulations for its skin care benefits. It protects the cells against free radicals and prevents the peroxidation of body fats as an in-vivo antioxidant., Vitamin E Acetate (Tocopherol) is the stable form of Vitamin E most often used in cosmetic formulations for its skin care benefits. It protects the cell…	472.74	58-95-7	The physical form of the compound is liquid, which can be dissolved in any proportion.	N/A	N/A	N/A	http://selleckchem.com/products/vitamin-e-acetate.html	C31H52O3	free base	Tocopherol acetate	CC(C)CCCC(C)CCCC(C)CCCC1(C)CCC2=C(C)C(=C(C)C(=C2O1)C)OC(C)=O	10.45	3	0	14
S3684	Methacholine chloride	f2	L8000-10	in 10mM DMSO	AChR	Neuronal Signaling	Methacholine (Mecholyl, Acetyl-β-methylcholine) is a synthetic choline ester that acts as a non-selective muscarinic receptor agonist in the parasympathetic nervous system but has little effects on the nicotinic receptors.	195.69	62-51-1	39	199.29	39	199.29	http://selleckchem.com/products/methacholine-chloride.html	C8H18NO2.Cl	chloride	Mecholyl chloride, Acetyl-β-methylcholine chloride	[Cl-].CC(C[N+](C)(C)C)OC(C)=O	-3.492	2	0	4
S3687	Urea	h2	L8000-10	in 10mM DMSO	Others	Metabolism	Urea (Carbonyldiamide, Ureophil) is a highly soluble organic compound formed in the liver from ammonia produced by the deamination of amino acids. It is the principal end product of protein catabolism and constitutes about one half of the total urinary solids.	60.06	57-13-6	12	199.8	12	199.8	http://selleckchem.com/products/urea.html	CH4N2O	free base	Carbonyldiamide, Ureophil	NC(N)=O	-1.043	1	2	0
S3690	Pargyline hydrochloride	a3	L8000-10	in 10mM DMSO	MAO	Metabolism	Pargyline is an irreversible inhibitor of monoamine oxidase (MAO)-B with Ki values of 13 and 0.5 μM for time-dependent inhibition of the activity of MAO-A and -B, respectivey.	195.69	306-07-0	39	199.29	39	199.29	http://selleckchem.com/products/pargyline-hydrochloride.html	C11H13N.HCl	hydrochloride	Pargylamine hydrochloride	Cl.CN(CC#C)CC1=CC=CC=C1	3.477	0	0	3
S3692	N-Ethylmaleimide (NEM)	b3	L8000-10	in 10mM DMSO	Cysteine Protease,DUB	Proteases	N-Ethylmaleimide (NEM) is an organic compound that is derived from maleic acid. It is an irreversible inhibitor of all cysteine peptidases, with alkylation occurring at the active site thiol group. N-Ethylmaleimide (NEM) inactivates endogenous deubiquitinating enzymes (DUBs). N-Ethylmaleimide (NEM) specifically inhibits phosphate transport in mitochondria.	125.13	128-53-0	25	199.79	25	199.79	http://selleckchem.com/products/n-ethylmaleimide-nem.html	C6H7NO2	free base	N/A	CCN1C(=O)C=CC1=O	0.16	2	0	1
S3694	Glucosamine hydrochloride	c3	L8000-10	in 10mM DMSO	Others	Immunology & Inflammation	Glucosamine (2-Amino-2-deoxy-glucose, Chitosamine) is a natural constituent of glycosaminoglycans in the cartilage matrix and synovial fluid, also presents in the shells of shellfish, animal bones, bone marrow, and fungi. Glucosamine is commonly used as a treatment for osteoarthritis, although its acceptance as a medical therapy varies.	215.63	66-84-2	4	18.55	43	199.42	http://selleckchem.com/products/glucosamine-hydrochloride.html	C6H13NO5.HCl	hydrochloride	2-Amino-2-deoxy-glucose HCl, Chitosamine HCl	Cl.NC1C(O)OC(CO)C(O)C1O	-2.422	1	4	1
S3697	Mafenide hydrochloride	d3	L8000-10	in 10mM DMSO	Carbonic Anhydrase	Metabolism	Mafenide is a sulfonamide that inhibits the enzyme carbonic anhydrase and is used as topical anti-infective, especially in burn therapy.	222.69	138-37-4	44	197.58	44	197.58	http://selleckchem.com/products/mafenide-hydrochloride.html	C7H10N2O2S.HCl	hydrochloride	4-Aminomethylbenzenesulfonamide hydrochloride	Cl.NCC1=CC=C(C=C1)[S](N)(=O)=O	0.023	2	2	2
S3698	Nortriptyline hydrochloride	e3	L8000-10	in 10mM DMSO	Autophagy	Autophagy	Nortriptyline hydrochloride (Desitriptyline, ELF-101, EN-7048, Desmethylamitriptyline) is the hydrochloride salt form of nortriptyline, a tricyclic antidepressant agent used for short-term treatment of various forms of depression.	299.84	894-71-3	59	196.77	59	196.77	http://selleckchem.com/products/nortriptyline-hydrochloride.html	C19H21N.HCl	hydrochloride	Desitriptyline HCl, ELF-101 hydrochloride, EN-7048 hydrochloride, Desmethylamitriptyline hydrochloride	Cl.CNCCC=C1C2=C(CCC3=C1C=CC=C3)C=CC=C2	4.618	0	1	3
S3701	Benactyzine hydrochloride	f3	L8000-10	in 10mM DMSO	AChR	Neuronal Signaling	Benactyzine hydrochloride is a centrally acting muscarinic antagonist. It is used as an antidepressant in the treatment of depression and associated anxiety.	363.88	57-37-4	72	197.87	72	197.87	http://selleckchem.com/products/benactyzine-hydrochloride.html	C20H25NO3.HCl	hydrochloride	N/A	Cl.CCN(CC)CCOC(=O)C(O)(C1=CC=CC=C1)C2=CC=CC=C2	3.832	2	0	9
S3707	Ethopabate	g3	L8000-10	in 10mM DMSO	Parasite	Microbiology	Ethopabate (ETP, Ethyl pabate) is a coccidiostat that is frequently used to prevent and treat coccidiosis in chickens.	237.25	59-06-3	47	198.1	<1	N/A	http://selleckchem.com/products/ethopabate.html	C12H15NO4	free base	Ethyl pabate	CCOC1=CC(=CC=C1C(=O)OC)NC(C)=O	1.138	4	1	5
S3711	Carbasalate Calcium	h3	L8000-10	in 10mM DMSO	Anti-infection	Microbiology	Carbasalate calcium (Iromin, Alcacyl, Omegin, Rheomin, Solupsan) is an analgesic, antipyretic, and anti-inflammatory drug as well as a platelet aggregation inhibitor.	458.43	5749-67-7	11	23.99	91	198.5	http://selleckchem.com/products/carbasalate-calcium.html	C18H14O8.CH4N2O.Ca	calcium salt	Iromin, Alcacyl, Omegin, Rheomin, Solupsan	CC(=O)OC1=C(C=CC=C1)C(=O)O[Ca]OC(=O)C2=C(OC(C)=O)C=CC=C2.NC(N)=O	1.594	9	2	10
S3714	Lifitegrast	a4	L8000-10	in 10mM DMSO	Integrin	Cytoskeletal Signaling	Lifitegrast (SAR1118,SHP-606) is a novel small molecule integrin antagonist that inhibits a specific T cell-mediated inflammatory pathway involved in the pathogenesis of DED.	615.48	1025967-78-5	100	162.47	<1	N/A	http://selleckchem.com/products/lifitegrast.html	C29H24Cl2N2O7S	free base	SAR1118,SHP-606	C[S](=O)(=O)C1=CC=CC(=C1)CC(NC(=O)C2=C(Cl)C=C3CN(CCC3=C2Cl)C(=O)C4=CC=C5C=COC5=C4)C(O)=O	4.79	6	1	7
S3724	Velpatasvir	d4	L8000-10	in 10mM DMSO	COVID-19,HCV Protease	Proteases	Velpatasvir (GS-5816,VEL) is a second-generation NS5A inhibitor that inhibits hepatitis C viral replication through acting on the crucial "membranous web" that facilitates RNA replication.	883	1377049-84-7	100	113.25	100	113.25	http://selleckchem.com/products/velpatasvir.html	C49H54N8O8	free base	GS-5816,VEL	COCC1CC(N(C1)C(=O)C(NC(=O)OC)C2=CC=CC=C2)C3=NC=C([NH]3)C4=CC=C5C(=C4)COC6=C5C=C7C=CC8=C(N=C([NH]8)C9CCC(C)N9C(=O)C(NC(=O)OC)C(C)C)C7=C6	5.789	10	4	13
S3731	Tipiracil hydrochloride	e4	L8000-10	in 10mM DMSO	Phosphorylase,Thymidylate Synthase	Metabolism	Tipiracil (MA-1) is an inhibitor of thymidine phosphorylase, the enzyme that degrades trifluridine into trifluorothymidine. Its combination with trifluridine increases the bioavailability of trifluridine.	279.12	183204-72-0	8	28.66	55	197.05	http://selleckchem.com/products/tipiracil-hydrochloride.html	C9H11ClN4O2.HCl	hydrochloride	MA-1 hydrochloride	Cl.ClC1=C(CN2CCCC2=N)NC(=O)NC1=O	-0.388	2	2	2
S3732	Avibactam sodium	f4	L8000-10	in 10mM DMSO	β-lactamase	Microbiology	Avibactam (AVE-1330A, NXL104) is a covalent, reversible, non-β-lactam β-lactamase inhibitor with IC50 values of 8, 80, and 38 nM for TEM-1, P99, and KPC-2 β-lactamases, respectively.	287.23	1192491-61-4	57	198.45	57	198.45	http://selleckchem.com/products/avibactam-sodium.html	C7H10N3O6.Na	sodium salt	AVE-1330A, NXL104	[Na+].NC(=O)C1CCC2CN1C(=O)N2O[S]([O-])(=O)=O	-3.785	3	1	3
S3739	Calcipotriene	g4	L8000-10	in 10mM DMSO	Vitamin	Metabolism	Calcipotriene (Calcipotriol, MC903) is a synthetic derivative of calcitriol, a form of vitamin D. It can induce differentiation and suppresses proliferation of keratinocytes, reversing abnormal keratinocyte changes in psoriasis, and lead to normalization of epidermal growth. Calcipotriol is a synthetic VitD3 analogue with a high affinity for the vitamin D receptor.	412.6	112965-21-6	82	198.74	<1	N/A	http://selleckchem.com/products/calcipotriene.html	C27H40O3	free base	Calcipotriol, MC903	CC(\C=C\C(O)C1CC1)C2CCC3/C(CCCC23C)=C/C=C\4CC(O)CC(O)C4=C	4.679	0	3	5
S3742	Cholic acid	h4	L8000-10	in 10mM DMSO	Others	Metabolism	Cholic acid is a naturally occurring bile acid that is insoluble in water and is used to treat patients with genetic deficiencies in the synthesis of bile acids.	408.57	81-25-4	81	198.25	<1	N/A	http://selleckchem.com/products/cholic-acid.html	C24H40O5	free base	N/A	CC(CCC(O)=O)C1CCC2C3C(O)CC4CC(O)CCC4(C)C3CC(O)C12C	2.912	1	3	4
S3745	Balsalazide disodium	a5	L8000-10	in 10mM DMSO	Immunology & Inflammation related,Interleukins,STAT	Immunology & Inflammation	Balsalazide Disodium is the disodium salt form of balsalazide, an aminosalicylate and oral prodrug that is enzymatically cleaved in the colon to produce the anti-inflammatory agent mesalazine. Balsalazide Disodium suppress colitis-associated carcinogenesis through modulation of IL-6/STAT3 pathway.	437.31	150399-21-6	87	198.94	87	198.94	http://selleckchem.com/products/balsalazide-disodium.html	C17H13N3O6.2H2O.2Na	disodium salt dihydrate	N/A	O.O.[Na+].[Na+].OC1=CC=C(C=C1C([O-])=O)N=NC2=CC=C(C=C2)C(=O)NCCC([O-])=O	-0.838	3	2	7
S3751	Quinidine hemisulfate hydrate	b5	L8000-10	in 10mM DMSO	Sodium Channel	Transmembrane Transporters	Quinidine hemisulfate hydrate(Chinidin, Pitayine, β-quinine, (+)-quinidine) acts as a blocker of voltage-gated sodium channels, also an antimuscarinic and antimalarial.	391.47	6591-63-5	100	154.12	9	13.87	http://selleckchem.com/products/quinidine-sulfate.html	C20H24N2O2.1/2H2SO4.H2O	hemisulfate hydrate	Chinidin Sodium, Pitayine Sodium, β-quinine Sodium, (+)-quinidine Sodium	O.O.COC1=CC2=C(C=C1)N=CC=C2C(O)C3CC4CCN3CC4C=C.COC5=CC6=C(C=C5)N=CC=C6C(O)C7CC8CCN7CC8C=C.O[S](O)(=O)=O	4.446	4	2	8
S3755	Betaine	c5	L8000-10	in 10mM DMSO	Others	Others	Betaine (trimethylglycine, glycine betaine, lycine, oxyneurine), a methyl derivative of glycine first isolated from sugar beets, has been shown to have potential benefits for fighting heart disease, improving body composition, and helping promote muscle gain and fat loss because of its abilities to promote protein synthesis in the body.	117.15	107-43-7	23	196.33	N/A	N/A	http://selleckchem.com/products/betaine.html	C5H11NO2	inner salt	trimethylglycine, glycine betaine, lycine, oxyneurine	C[N+](C)(C)CC([O-])=O	-3.028	0	0	2
S3758	Sinomenine hydrochloride	d5	L8000-10	in 10mM DMSO	Autophagy,Immunology & Inflammation related	Immunology & Inflammation	Sinomenine (SN, Cucoline, Kukoline, Sabianine A), extracted from the Chinese medicinal plant, sinomenium acutum, is a potent anti-inflammatory and neuroprotective agent.	365.85	6080-33-7	73	199.54	N/A	N/A	http://selleckchem.com/products/sinomenine-hydrochloride.html	C19H23NO4.HCl	hydrochloride	Cucoline hydrochloride, Kukoline hydrochloride, Sabianine A hydrochloride	Cl.COC1=C(O)C2=C(CC3C4C=C(OC)C(=O)CC24CCN3C)C=C1	2.056	3	1	2
S3759	Norcantharidin	e5	L8000-10	in 10mM DMSO	c-Met,EGFR	Protein Tyrosine Kinase	Norcantharidin (Endothall anhydride) is a synthetic anticancer compound which is a dual inhibitor for c-Met and EGFR in human colon cancers.	168.15	29745-04-8	33	196.25	N/A	N/A	http://selleckchem.com/products/norcantharidin.html	C8H8O4	free base	Endothall anhydride	O=C1OC(=O)C2C3CCC(O3)C12	-0.117	4	0	0
S3763	Cinnamaldehyde	f5	L8000-10	in 10mM DMSO	TRP Channel	Transmembrane Transporters	Cinnamaldehyde is a flavonoid that is naturally synthesized by the shikimate pathway. Its supplementation can improve glucose and lipid homeostasis in diabetic animals; a TRPA1 agonist.	132.16	14371-10-9	The physical form of the compound is liquid, which can be dissolved in any proportion.	N/A	N/A	N/A	http://selleckchem.com/products/cinnamaldehyde.html	C9H8O	free base	N/A	O=C\C=C\C1=CC=CC=C1	1.949	1	0	2
S3766	Tanshinone IIA sulfonate sodium	g5	L8000-10	in 10mM DMSO	Calcium Channel,P2 Receptor,P450 (e.g. CYP17)	Metabolism	Sodium tanshinone IIA sulfonate (STS) is a water-soluble derivative of tanshinone IIA isolated as the main pharmacologically active natural compound from a traditional Chinese herbal medicine, the dried root of Salvia miltiorrhiza Bunge known as Danshen. Sodium tanshinone IIA sulfonate (STS) is a potent negative allosteric modulator of the human purinergic receptor P2X7. Sodium tanshinone IIA sul…	396.39	69659-80-9	79	199.3	N/A	N/A	http://selleckchem.com/products/tanshinone-iia-sulfonate-sodium.html	C19H17O6S.Na	sodium salt	N/A	[Na+].CC1=C(OC2=C1C(=O)C(=O)C3=C2C=CC4=C3CCCC4(C)C)[S]([O-])(=O)=O	1.873	3	0	1
S3769	Palmatine	h5	L8000-10	in 10mM DMSO	AChR	Neuronal Signaling	Palmatine (Berbericinine, Burasaine), an isoquinoline alkaloid, has sedative, antidepressant, antioxidative, anti-ulcerative, antacid, anticancer, and anti-metastatic activities.	352.4	3486-67-7	70	198.64	N/A	N/A	http://selleckchem.com/products/palmatine.html	C21H22NO4	free base	Berbericinine, Burasaine	COC1=CC2=C(C=C1OC)C3=CC4=C(C=[N+]3CC2)C(=C(OC)C=C4)OC	4.161	4	0	4
S3774	Dehydroandrographolide Succinate Potasium Salt	a6	L8000-10	in 10mM DMSO	Immunology & Inflammation related	Immunology & Inflammation	Dehydroandrographolide Succinate (DAS), extracted from herbal medicine Andrographis paniculata (Burm f) Nees, is widely used for the treatment of viral pneumonia and viral upper respiratory tract infections because of its immunostimulatory, anti-infective and anti-inflammatory effect.	570.67	76958-99-1	10	17.52	N/A	N/A	http://selleckchem.com/products/dehydroandrographolide-succinate-potasium-salt.html	C28H35O10.K	potassium salt	N/A	[K+].CC1(COC(=O)CCC([O-])=O)C(CCC2(C)C1CCC(=C)C2\C=C\C3=CCOC3=O)OC(=O)CCC(O)=O	1.553	7	0	13
S3776	Sophoricoside	b6	L8000-10	in 10mM DMSO	Immunology & Inflammation related	Immunology & Inflammation	Sophoricoside (SOPH) is an isoflavone isolated from Sophora japonica (Leguminosae) with numerous pharmacological effects, including anti- inflammatory, anti-cancer and immunosuppressive effects.	432.38	152-95-4	86	198.9	N/A	N/A	http://selleckchem.com/products/sophoricoside.html	C21H20O10	Isoflavone glycoside	N/A	OCC1OC(OC2=CC=C(C=C2)C3=COC4=C(C(=CC(=C4)O)O)C3=O)C(O)C(O)C1O	0.21	4	6	4
S3779	cis-Anethole	c6	L8000-10	in 10mM DMSO	Others	Others	Anethole ((Z)-Anethole, Cis-p-Propenylanisole, Cis-p-Anethole) has two isomers, the cis(Z) isomer being 15-38 times more toxic to animal than the trans(E) isomer. cis-Anethole is found in anise and Only a low level is permitted in flavours.	148.2	104-46-1	The physical form of the compound is liquid, which can be dissolved in any proportion.	N/A	N/A	N/A	http://selleckchem.com/products/cis-anethole.html	C10H12O	free base	(Z)-Anethole, Cis-p-Propenylanisole, Cis-p-Anethole	COC1=CC=C(\C=C\C)C=C1	2.767	1	0	2
S3785	Notoginsenoside R1	d6	L8000-10	in 10mM DMSO	Akt,ERK,PAI-1,PI3K	Metabolism	Notoginsenoside R1 (Sanchinoside R1) is the main ingredient with cardiovascular activity in Panax notoginseng. It inhibits TNF-α-induced PAI-1 overexpression via extracellular signal-related kinases (ERK1/2) and phosphatidylinositol 3-kinase (PI3K)/protein kinase B (PKB) signaling pathways.	933.13	80418-24-2	100	107.17	N/A	N/A	http://selleckchem.com/products/notoginsenoside-r1.html	C47H80O18	free base	Sanchinoside R1, NG-R1, NGR1	CC(C)=CCCC(C)(OC1OC(CO)C(O)C(O)C1O)C2CCC3(C)C2C(O)CC4C5(C)CCC(O)C(C)(C)C5C(CC34C)OC6OC(CO)C(O)C(O)C6OC7OCC(O)C(O)C7O	-0.11	6	12	12
S3788	Carvacrol	e6	L8000-10	in 10mM DMSO	AChR	Neuronal Signaling	Carvacrol (Cymophenol), monoterpenic phenol isomeric with thymol, has diverse activities such as antimicrobial, antitumor, an-timutagenic, antigenotoxic, analgesic, antispasmodic, anti-inflammatory, angiogenic, antiparasitic, antiplatelet, AChE inhibitory, antielastase, insecticidal, antihepatotoxic and hepatoprotective activities.	150.22	499-75-2	The physical form of the compound is liquid, which can be dissolved in any proportion.	N/A	N/A	N/A	http://selleckchem.com/products/carvacrol.html	C10H14O	free base	cymophenol	CC(C)C1=CC=C(C)C(=C1)O	3.268	0	1	1
S3794	Palmitic acid	f6	L8000-10	in 10mM DMSO	Others	Others	Palmitic acid (Hexadecanoic acid, Cetylic acid) is the most common saturated fatty acid found in animals, plants and microorganisms with anti-tumor activity.	256.42	57-10-3	51	198.89	N/A	N/A	http://selleckchem.com/products/palmitic-acid.html	C16H32O2	free base	hexadecanoic acid, Cetylic acid	CCCCCCCCCCCCCCCC(O)=O	6.393	1	0	14
S3802	Trigonelline Hydrochloride	g6	L8000-10	in 10mM DMSO	Bacterial	Microbiology	Trigonelline (Nicotinic acid N-methylbetaine, Coffearine, Gynesine), a major alkaloid component of fenugreek, has hypoglycemic, hypolipidemic, neuroprotective, antimigraine, sedative, memory-improving, antibacterial, antiviral, and anti-tumor activities, and also has been shown to reduce diabetic auditory neuropathy and platelet aggregation.	173.6	6138-41-6	18	103.69	N/A	N/A	http://selleckchem.com/products/trigonelline-hydrochloride.html	C7H8NO2.Cl	chloride	Nicotinic acid N-methylbetaine Hydrochloride, Coffearine Hydrochloride, Gynesine Hydrochloride	[Cl-].C[N+]1=CC(=CC=C1)C(O)=O	-1.61	1	0	1
[truncated: 990 more rows]
